# Supplementary material for: Molecular Mechanisms Underlying Hull-Caryopsis Adhesion/Separation Revealed by Comparative Transcriptomic Analysis of Covered/Naked Barley (Hordeum vulgare L.)
Source: Int J Mol Sci. 2015 Jun 23;16(6):14181–93. doi: 10.3390/ijms160614181 (PMC4490547; doi:10.3390/ijms160614181)
Supplement: Supplementary file 1 [file ijms-16-14181-s001.xlsx]

## Sheet: Table S1
Table S1. List of all expressed genes between Morex-VS-Dulihuang.
geneID	annotation in NCBI	annotation in IPK	geneLength	Morex-Expression	Dulihuang-Expression	Morex-RPKM	Dulihuang-RPKM	log2 Ratio(Dulihuang/Morex)	Up-Down-Regulation(Dulihuang/Morex)	P-value	FDR
AK354890	Hordeum vulgare subsp. vulgare mRNA for predicted protein, complete cds, clone: NIASHv1012P07	defensin precursor	252	0	707	0.001	284.009	18.1156	Up	3.23e-181	2.52e-179
MLOC_71920.1	Pectinesterase (EC 3.1.1.11)	880713 pectinesterase	1683	0	1961	0.001	117.952	16.8478	Up	0	0
AK360528	Hordeum vulgare subsp. vulgare mRNA for predicted protein, complete cds, clone: NIASHv1119O03	2613517 protein	729	0	769	0.001	106.785	16.7044	Up	4.75e-197	4.03e-195
AK251040.1	-	adp-ribosylation factor	543	0	551	0.001	102.722	16.6484	Up	2.21e-141	1.38e-139
MLOC_21916.1	Uncharacterized protein	hypothetical protein ZEAMMB73_263650	297	0	291	0.001	99.1858	16.5978	Up	5.46e-75	1.92e-73
MLOC_20004.1	Uncharacterized protein	PREDICTED: uncharacterized protein LOC100824735	249	0	226	0.001	91.8802	16.4875	Up	2.16e-58	6.07e-57
MLOC_66998.1	Predicted protein (Uncharacterized protein)	chalcone synthase	1239	0	926	0.001	75.6576	16.2072	Up	3.85e-237	3.75e-235
AK359941	Hordeum vulgare subsp. vulgare mRNA for predicted protein, complete cds, clone: NIASHv1107B18	skp1 protein	507	0	373	0.001	74.4756	16.1845	Up	6.28e-96	2.75e-94
AK357931	Hordeum vulgare subsp. vulgare mRNA for predicted protein, complete cds, clone: NIASHv1065C14	2770663 r40g2 protein	918	0	585	0.001	64.5099	15.9772	Up	4.59e-150	3.01e-148
AK248871.1	-	cationic amino acid partial	1281	0	748	0.001	59.1106	15.8511	Up	1.09e-191	9.01e-190
MLOC_21496.2	Uncharacterized protein	2612018 protein	891	0	373	0.001	42.3783	15.371	Up	6.28e-96	2.75e-94
MLOC_18385.1	Uncharacterized protein	bifunctional inhibitor lipid-transfer protein seed storage 2s albumin superfamily protein	378	0	150	0.001	40.171	15.2939	Up	5.52e-39	1.07e-37
MLOC_66363.2	Uncharacterized protein	extracellular ribonuclease le precursor	756	0	284	0.001	38.0285	15.2148	Up	3.35e-73	1.14e-71
AK372851	Hordeum vulgare subsp. vulgare mRNA for predicted protein, complete cds, clone: NIASHv3014E09	904233 leucine-rich repeat protein	489	0	180	0.001	37.2629	15.1855	Up	1.21e-46	2.76e-45
MLOC_16041.1	Uncharacterized protein	plant invertase pectin methylesterase inhibitor domain-containing protein	597	0	202	0.001	34.2523	15.0639	Up	2.91e-52	7.32e-51
MLOC_78521.1	Uncharacterized protein	sant myb protein	252	0	85	0.001	34.1453	15.0594	Up	2.19e-22	2.6e-21
AK376764	Hordeum vulgare subsp. vulgare mRNA for predicted protein, complete cds, clone: NIASHv3135C01	protein	1389	0	448	0.001	32.6504	14.9948	Up	4.43e-115	2.31e-113
AK369485	Hordeum vulgare subsp. vulgare mRNA for predicted protein, complete cds, clone: NIASHv2092D21	tpa: cellulose synthase-like family protein	2571	0	821	0.001	32.3262	14.9804	Up	2.5e-210	2.23e-208
MLOC_61669.1	Uncharacterized protein	PREDICTED: uncharacterized protein LOC100824735	234	0	74	0.001	32.0132	14.9664	Up	1.41e-19	1.49e-18
AK248479.1	-	f-box kelch-repeat protein skip4-like	1038	0	328	0.001	31.9882	14.9653	Up	1.94e-84	7.58e-83
AK357400	Hordeum vulgare subsp. vulgare mRNA for predicted protein, partial cds, clone: NIASHv1052H04	e3 ubiquitin-protein ligase rha1b-like	375	0	117	0.001	31.584	14.9469	Up	1.48e-30	2.3e-29
MLOC_38646.1	Predicted protein (Uncharacterized protein)	pectinesterase inhibitor domain containing protein	618	0	191	0.001	31.2866	14.9333	Up	1.87e-49	4.45e-48
AK375855	Hordeum vulgare subsp. vulgare mRNA for predicted protein, complete cds, clone: NIASHv3107M21	hat family dimerisation domain containing protein	1416	0	428	0.001	30.598	14.9012	Up	5.66e-110	2.84e-108
MLOC_26846.1	Uncharacterized protein	69573 zinc-binding	645	0	192	0.001	30.1338	14.8791	Up	1.04e-49	2.48e-48
MLOC_16261.1	Uncharacterized protein	-1 protein	600	0	151	0.001	25.4764	14.6369	Up	3.07e-39	5.99e-38
MLOC_47606.1	Uncharacterized protein	basic blue	366	0	86	0.001	23.7865	14.5379	Up	1.22e-22	1.47e-21
AK252827.1	-	2646418 chain covalent adduct between polyamine oxidase and n1ethyln11 ( methyl) at ph	1485	0	337	0.001	22.9729	14.4876	Up	9.78e-87	3.93e-85
AK360670	Hordeum vulgare subsp. vulgare mRNA for predicted protein, complete cds, clone: NIASHv1122P17	722423 lipid transfer protein	345	0	75	0.001	22.0067	14.4257	Up	7.83e-20	8.39e-19
AK376543	Hordeum vulgare subsp. vulgare mRNA for predicted protein, complete cds, clone: NIASHv3127E05	33743 os01g0106500	639	0	135	0.001	21.3868	14.3844	Up	3.74e-35	6.53e-34
MLOC_77504.1	Uncharacterized protein (Fragment)	nadh dehydrogenase nd2	108	0	22	0.001	20.6211	14.3318	Up	2.68e-06	1.11e-05
MLOC_13245.1	Uncharacterized protein	1907916 tpa: carboxyl-terminal peptidase	1188	0	240	0.001	20.4507	14.3199	Up	5.76e-62	1.71e-60
AK370683	Hordeum vulgare subsp. vulgare mRNA for predicted protein, complete cds, clone: NIASHv2114J14	60s ribosomal protein mitochondrial-like	357	0	63	0.001	17.8643	14.1248	Up	9.08e-17	8.5e-16
MLOC_10899.1	Leucoanthocyanidin reductase (EC 1.17.1.3) (Predicted protein) (Uncharacterized protein)	leucoanthocyanidin reductase	1056	0	178	0.001	17.0635	14.0586	Up	3.91e-46	8.9e-45
MLOC_6041.1	Uncharacterized protein	transcription factor gamyb-like	1281	0	214	0.001	16.9113	14.0457	Up	2.51e-55	6.66e-54
AK363547	Hordeum vulgare subsp. vulgare mRNA for predicted protein, complete cds, clone: NIASHv2016J04	2605932 protein	888	0	146	0.001	16.6438	14.0227	Up	5.8e-38	1.1e-36
MLOC_17358.1	Predicted protein (Uncharacterized protein)	erg28 like protein	426	0	66	0.001	15.6837	13.937	Up	1.56e-17	1.51e-16
AK372789	Hordeum vulgare subsp. vulgare mRNA for predicted protein, complete cds, clone: NIASHv3012N18	protein iq-domain 1-like	1497	0	231	0.001	15.6208	13.9312	Up	1.14e-59	3.27e-58
AK364111	Hordeum vulgare subsp. vulgare mRNA for predicted protein, complete cds, clone: NIASHv2021N11	1040737 ef-hand containing	1128	0	171	0.001	15.3462	13.9056	Up	2.4e-44	5.23e-43
MLOC_62883.1	Uncharacterized protein	invertase inhibitor	615	0	90	0.001	14.8143	13.8547	Up	1.16e-23	1.46e-22
MLOC_1315.1	Predicted protein (Uncharacterized protein)	pectinmethylesterase inhibitor	540	0	78	0.001	14.6222	13.8359	Up	1.34e-20	1.48e-19
AK357890	Hordeum vulgare subsp. vulgare mRNA for predicted protein, complete cds, clone: NIASHv1064D24	pore-forming toxin-like protein hfr-2	1524	0	216	0.001	14.3477	13.8085	Up	7.74e-56	2.07e-54
AK375038	Hordeum vulgare subsp. vulgare mRNA for predicted protein, complete cds, clone: NIASHv3084A05	5a2 protein precursor	387	0	54	0.001	14.1252	13.786	Up	1.8e-14	1.48e-13
MLOC_38034.1	Uncharacterized protein	771776 invertase inhibitor homolog	552	0	73	0.001	13.3874	13.7086	Up	2.54e-19	2.66e-18
AK248200.1	-	2614069 protein	780	0	103	0.001	13.3677	13.7065	Up	5.55e-27	7.76e-26
MLOC_41452.1	Uncharacterized protein	predicted protein	246	0	32	0.001	13.1682	13.6848	Up	7.49e-09	4.07e-08
MLOC_17891.1	Uncharacterized protein	protein srg1-like	510	0	63	0.001	12.505	13.6102	Up	9.08e-17	8.5e-16
MLOC_28859.1	Uncharacterized protein	chemocyanin precursor	366	0	44	0.001	12.1698	13.571	Up	6.46e-12	4.49e-11
MLOC_71845.1	Uncharacterized protein	2608577 protein	1431	0	172	0.001	12.1675	13.5707	Up	1.33e-44	2.93e-43
AK249150.1	-	proline-rich protein	534	0	64	0.001	12.1325	13.5666	Up	5.04e-17	4.78e-16
AK365563	Hordeum vulgare subsp. vulgare mRNA for predicted protein, complete cds, clone: NIASHv2035A21	2607816 protein	936	0	112	0.001	12.1131	13.5643	Up	2.79e-29	4.17e-28
AK249652.1	-	probable phospholipid hydroperoxide glutathione peroxidase mitochondrial-like	495	0	58	0.001	11.8614	13.534	Up	1.72e-15	1.49e-14
AK248822.1	-	2506354 expansin os-expa2	747	0	82	0.001	11.1124	13.4399	Up	1.28e-21	1.48e-20
MLOC_16642.1	Uncharacterized protein	-1 protein	957	0	98	0.001	10.3664	13.3396	Up	1.05e-25	1.41e-24
AK359149	Hordeum vulgare subsp. vulgare mRNA for predicted protein, complete cds, clone: NIASHv1090L24	2705667 precursor thionin	411	0	40	0.001	9.85215	13.2662	Up	6.78e-11	4.35e-10
MLOC_6194.1	Uncharacterized protein	bowman-birk trypsin inhibitor-like protein	276	0	26	0.001	9.53624	13.2192	Up	2.55e-07	1.18e-06
MLOC_81119.1	Predicted protein (Uncharacterized protein)	protein	1311	0	122	0.001	9.42042	13.2016	Up	7.8e-32	1.26e-30
MLOC_59726.1	Uncharacterized protein	leucine-rich repeat-like protein	1287	0	114	0.001	8.96684	13.1304	Up	8.61e-30	1.32e-28
AK357981	Hordeum vulgare subsp. vulgare mRNA for predicted protein, complete cds, clone: NIASHv1066F21	gata transcription factor family protein	1338	0	118	0.001	8.92768	13.1241	Up	8.2e-31	1.29e-29
AK373769	Hordeum vulgare subsp. vulgare mRNA for predicted protein, complete cds, clone: NIASHv3043E01	727075 os12g0599800	579	0	49	0.001	8.56703	13.0646	Up	3.41e-13	2.58e-12
MLOC_69264.1	Uncharacterized protein	2612671 protein	540	0	45	0.001	8.4359	13.0423	Up	3.59e-12	2.55e-11
MLOC_78076.1	Uncharacterized protein	2902325 protein	390	0	32	0.001	8.30612	13.02	Up	7.49e-09	4.07e-08
AK373922	Hordeum vulgare subsp. vulgare mRNA for predicted protein, complete cds, clone: NIASHv3047K10	protein	1902	0	154	0.001	8.1964	13.0008	Up	5.26e-40	1.05e-38
MLOC_28203.1	Uncharacterized protein	leucine rich repeat family protein	426	0	34	0.001	8.07946	12.98	Up	2.31e-09	1.31e-08
AK248185.1	-	2752855 os07g0646600	1386	0	110	0.001	8.03419	12.9719	Up	9.05e-29	1.34e-27
MLOC_62538.1	Uncharacterized protein	2889837 protein	1143	0	90	0.001	7.97093	12.9605	Up	1.16e-23	1.46e-22
MLOC_50452.1	Uncharacterized protein	1178830 os04g0587200	525	0	41	0.001	7.90565	12.9487	Up	3.77e-11	2.47e-10
AK376358	Hordeum vulgare subsp. vulgare mRNA for predicted protein, complete cds, clone: NIASHv3121K08	f-box kelch-repeat protein at1g67480-like	1155	0	90	0.001	7.88812	12.9455	Up	1.16e-23	1.45e-22
AK363840	Hordeum vulgare subsp. vulgare mRNA for predicted protein, complete cds, clone: NIASHv2019F06	protein	1017	0	79	0.001	7.86356	12.941	Up	7.46e-21	8.34e-20
AK368127	Hordeum vulgare subsp. vulgare mRNA for predicted protein, complete cds, clone: NIASHv2068K18	cathepsin b	1065	0	80	0.001	7.6042	12.8926	Up	4.14e-21	4.69e-20
MLOC_56674.1	Uncharacterized protein	hypothetical protein ZEAMMB73_155830	375	0	28	0.001	7.55857	12.8839	Up	7.86e-08	3.87e-07
MLOC_14435.1	Uncharacterized protein	2604840 protein	666	0	49	0.001	7.44792	12.8626	Up	3.41e-13	2.58e-12
MLOC_34868.1	Uncharacterized protein	1023481 os03g0594700	249	0	18	0.001	7.31789	12.8372	Up	2.81e-05	0.00010231
MLOC_53961.1	Uncharacterized protein	retrotransposon unclassified	1110	0	78	0.001	7.11352	12.7963	Up	1.34e-20	1.48e-19
AK375625	Hordeum vulgare subsp. vulgare mRNA for predicted protein, complete cds, clone: NIASHv3099K09	2879544 os02g0778500	1269	0	87	0.001	6.94018	12.7608	Up	6.76e-23	8.25e-22
MLOC_63017.1	Uncharacterized protein	f-box fbd lrr-repeat protein at4g03220-like	786	0	53	0.001	6.826	12.7368	Up	3.25e-14	2.62e-13
MLOC_57898.2	Predicted protein (Uncharacterized protein)	basic blue	366	0	24	0.001	6.63809	12.6966	Up	8.26e-07	3.63e-06
MLOC_78774.1	Uncharacterized protein	2840914 os08g0142900	573	0	37	0.001	6.53672	12.6744	Up	3.96e-10	2.39e-09
MLOC_14012.1	Uncharacterized protein	protein	1374	0	86	0.001	6.33614	12.6294	Up	1.22e-22	1.47e-21
AK363281	Hordeum vulgare subsp. vulgare mRNA for predicted protein, complete cds, clone: NIASHv2013P07	k(+) efflux antiporter chloroplastic-like	2007	0	122	0.001	6.15354	12.5872	Up	7.8e-32	1.26e-30
MLOC_75951.1	Uncharacterized protein	sant myb protein	252	0	15	0.001	6.02565	12.5569	Up	0.000164182	0.000531358
MLOC_73385.1	Uncharacterized protein (Fragment)	transposon mutator sub-class	144	0	8	0.001	5.62394	12.4574	Up	0.0100652	0.0229634
MLOC_22984.1	Uncharacterized protein	heavy metal associated domain-containing protein	369	0	20	0.001	5.48677	12.4217	Up	8.68e-06	3.38e-05
MLOC_201.1	Uncharacterized protein	chemocyanin precursor	372	0	20	0.001	5.44252	12.4101	Up	8.68e-06	3.38e-05
MLOC_13375.1	Uncharacterized protein	49605 transcription factor 1	1995	0	107	0.001	5.42942	12.4066	Up	5.28e-28	7.61e-27
AK372660	Hordeum vulgare subsp. vulgare mRNA for predicted protein, partial cds, clone: NIASHv3008J11	1712400 qltg3-1	339	0	18	0.001	5.37509	12.3921	Up	2.81e-05	0.000102241
MLOC_78417.1	Uncharacterized protein	tpa: protein phosphatase 2c family protein	705	0	37	0.001	5.31283	12.3753	Up	3.96e-10	2.39e-09
AK370562	Hordeum vulgare subsp. vulgare mRNA for predicted protein, complete cds, clone: NIASHv2112H22	hat family dimerization domain-containing protein	858	0	45	0.001	5.30931	12.3743	Up	3.59e-12	2.55e-11
MLOC_38560.1	Uncharacterized protein	rna binding protein	921	0	48	0.001	5.27588	12.3652	Up	6.15e-13	4.58e-12
MLOC_61532.1	Predicted protein (Uncharacterized protein)	purine permease	1221	0	63	0.001	5.22321	12.3507	Up	9.08e-17	8.5e-16
AK251849.1	-	protein mei2-like 4-like	1242	0	64	0.001	5.2164	12.3488	Up	5.04e-17	4.78e-16
MLOC_35529.1	Uncharacterized protein	protein	498	0	25	0.001	5.08187	12.3111	Up	4.59e-07	2.07e-06
MLOC_65533.1	Uncharacterized protein	gibberellin-regulated protein	360	0	18	0.001	5.06154	12.3054	Up	2.81e-05	0.00010219
AK364898	Hordeum vulgare subsp. vulgare mRNA for predicted protein, partial cds, clone: NIASHv2029D19	protein kinase superfamily protein	1635	0	80	0.001	4.95319	12.2741	Up	4.14e-21	4.69e-20
AK358748	Hordeum vulgare subsp. vulgare mRNA for predicted protein, complete cds, clone: NIASHv1082I03	2890917 os02g0637200	249	0	12	0.001	4.8786	12.2523	Up	0.000958064	0.00271657
MLOC_10339.1	Uncharacterized protein	-1 protein	834	0	40	0.001	4.8552	12.2453	Up	6.78e-11	4.35e-10
MLOC_10053.1	Uncharacterized protein	proline-rich protein precursor	843	0	40	0.001	4.80336	12.2298	Up	6.78e-11	4.35e-10
MLOC_22809.1	Uncharacterized protein	protein	654	0	30	0.001	4.64362	12.181	Up	2.43e-08	1.25e-07
MLOC_5043.1	Uncharacterized protein	1029128 at3g22845 mwi23_22	699	0	32	0.001	4.63432	12.1781	Up	7.49e-09	4.07e-08
AK376262	Hordeum vulgare subsp. vulgare mRNA for predicted protein, complete cds, clone: NIASHv3119G17	anther-specific protein	729	0	33	0.001	4.58247	12.1619	Up	4.16e-09	2.31e-08
MLOC_78576.1	Uncharacterized protein	1219980 os07g0515700	672	0	30	0.001	4.51923	12.1419	Up	2.43e-08	1.25e-07
MLOC_17346.2	Uncharacterized protein	bidirectional sugar transporter sweet6b-like	741	0	33	0.001	4.50826	12.1384	Up	4.16e-09	2.31e-08
MLOC_79874.1	Uncharacterized protein	transposon mutator sub-class	270	0	12	0.001	4.49915	12.1354	Up	0.000958064	0.00271798
MLOC_43395.1	Uncharacterized protein	hypothetical protein SORBIDRAFT_06g020403	135	0	6	0.001	4.49915	12.1354	Up	0.0326238	0.0652895
AK361123	Hordeum vulgare subsp. vulgare mRNA for predicted protein, complete cds, clone: NIASHv1132O14	1636228 os09g0309500	666	0	29	0.001	4.40795	12.1059	Up	4.37e-08	2.2e-07
AK249751.1	-	abscisic stress ripening	414	0	18	0.001	4.40134	12.1037	Up	2.81e-05	0.000102224
MLOC_62422.1	Predicted protein (Uncharacterized protein)	snf1-related protein kinase regulatory subunit beta-1-like	858	0	37	0.001	4.36543	12.0919	Up	3.96e-10	2.39e-09
AK249066.1	-	1665687 os03g0241400	849	0	36	0.001	4.29247	12.0676	Up	7.13e-10	4.21e-09
AK249159.1	-	cyclin h-1	999	0	42	0.001	4.25595	12.0553	Up	2.09e-11	1.4e-10
AK359871	Hordeum vulgare subsp. vulgare mRNA for predicted protein, complete cds, clone: NIASHv1105C06	catalytic hydrolase	480	0	20	0.001	4.21795	12.0423	Up	8.68e-06	3.38e-05
AK354554	Hordeum vulgare subsp. vulgare mRNA for predicted protein, complete cds, clone: NIASHv1008G18	1901424 harpin-induced protein	723	0	30	0.001	4.20045	12.0363	Up	2.43e-08	1.25e-07
MLOC_78880.1	Uncharacterized protein	basic blue	366	0	15	0.001	4.14881	12.0185	Up	0.000164182	0.000531121
AK354213	Hordeum vulgare subsp. vulgare mRNA for predicted protein, complete cds, clone: NIASHv1005N04	legumin-like protein	252	0	10	0.001	4.0171	11.9719	Up	0.00310532	0.00796427
MLOC_24849.2	Uncharacterized protein	kinesin heavy chain isoform	405	0	16	0.001	3.99924	11.9655	Up	9.12e-05	0.000306687
AK371947	Hordeum vulgare subsp. vulgare mRNA for predicted protein, complete cds, clone: NIASHv2143M09	probable plastid-lipid-associated protein chloroplastic-like	513	0	20	0.001	3.94662	11.9464	Up	8.68e-06	3.38e-05
MLOC_4832.2	Uncharacterized protein	thiosulfate chloroplastic-like	387	0	15	0.001	3.92368	11.938	Up	0.000164182	0.000531043
AK375435	Hordeum vulgare subsp. vulgare mRNA for predicted protein, complete cds, clone: NIASHv3094D20	expansin expa2	774	0	30	0.001	3.92368	11.938	Up	2.43e-08	1.25e-07
MLOC_59030.1	Uncharacterized protein	1909347 cs 5	1098	0	42	0.001	3.87222	11.9189	Up	2.09e-11	1.4e-10
AK358948	Hordeum vulgare subsp. vulgare mRNA for predicted protein, complete cds, clone: NIASHv1086D15	599622 nb-arc domain containing expressed	2985	0	114	0.001	3.8661	11.9167	Up	8.61e-30	1.32e-28
MLOC_18875.1	Uncharacterized protein (Fragment)	2604723 ribosomal protein s14	105	0	4	0.001	3.85641	11.913	Up	0.105742	0.178465
MLOC_9448.1	Uncharacterized protein	protein far1-related sequence 5-like	240	0	9	0.001	3.79616	11.8903	Up	0.00559068	0.0135899
MLOC_16758.1	Uncharacterized protein	predicted protein	267	0	10	0.001	3.79142	11.8885	Up	0.00310532	0.00797926
MLOC_34275.1	Uncharacterized protein	1178473 osigba0157k09-	216	0	8	0.001	3.74929	11.8724	Up	0.0100652	0.0229251
MLOC_64293.1	Uncharacterized protein	pollen surface protein	669	0	24	0.001	3.6316	11.8264	Up	8.26e-07	3.63e-06
MLOC_16.1	Uncharacterized protein	hypothetical protein SORBIDRAFT_02g035795	474	0	17	0.001	3.63064	11.826	Up	5.07e-05	0.000177398
MLOC_34311.1	Uncharacterized protein	59106 os06g0727000	336	0	12	0.001	3.61539	11.8199	Up	0.000958064	0.00271445
MLOC_63000.1	Uncharacterized protein	2881468 germin-like protein	648	0	23	0.001	3.59307	11.811	Up	1.49e-06	6.35e-06
MLOC_53612.2	Uncharacterized protein	heavy-metal-associated domain-containing	1140	0	40	0.001	3.55196	11.7944	Up	6.78e-11	4.36e-10
MLOC_28171.1	Uncharacterized protein (Fragment)	retrotransposon line subclass	258	0	9	0.001	3.53131	11.786	Up	0.00559068	0.0135748
MLOC_9992.1	Uncharacterized protein	cox viia-like protein	201	0	7	0.001	3.52545	11.7836	Up	0.0181208	0.038732
MLOC_20899.1	Uncharacterized protein	1636831 os10g0549850	579	0	20	0.001	3.49675	11.7718	Up	8.68e-06	3.38e-05
MLOC_32427.1	Uncharacterized protein	retrotransposon line subclass	348	0	12	0.001	3.49072	11.7693	Up	0.000958064	0.00271375
AK249685.1	-	2535141 at4g37930 f20d10_50	1530	0	51	0.001	3.37436	11.7204	Up	1.05e-13	8.23e-13
MLOC_69785.1	Uncharacterized protein	serine threonine-protein phosphatase 7 long form homolog	210	0	7	0.001	3.37436	11.7204	Up	0.0181208	0.0387017
MLOC_7523.1	Uncharacterized protein	harpin-induced protein 1 containing expressed	660	0	21	0.001	3.22098	11.6533	Up	4.82e-06	1.93e-05
MLOC_69072.2	Uncharacterized protein	77850 myb dna-binding domain superfamily protein	600	0	19	0.001	3.20564	11.6464	Up	1.56e-05	5.88e-05
MLOC_42518.1	Uncharacterized protein (Fragment)	minichromosomal maintenance factor	159	0	5	0.001	3.18336	11.6363	Up	0.0587342	0.108431
AK362403	Hordeum vulgare subsp. vulgare mRNA for predicted protein, partial cds, clone: NIASHv2004M03	protein cypro4-like	969	0	30	0.001	3.13408	11.6138	Up	2.43e-08	1.25e-07
MLOC_28252.1	Uncharacterized protein (Fragment)	retrotransposon unclassified	261	0	8	0.001	3.10286	11.5994	Up	0.0100652	0.0229347
AK373255	Hordeum vulgare subsp. vulgare mRNA for predicted protein, complete cds, clone: NIASHv3025E23	protein hothead-like	1767	0	54	0.001	3.09364	11.5951	Up	1.8e-14	1.48e-13
MLOC_18448.1	Uncharacterized protein	hypothetical protein SORBIDRAFT_07g003420	393	0	12	0.001	3.09102	11.5939	Up	0.000958064	0.0027148
MLOC_32955.1	Uncharacterized protein	PREDICTED: uncharacterized protein LOC100843700	426	0	13	0.001	3.0892	11.593	Up	0.000532154	0.00157818
AK377101	Hordeum vulgare subsp. vulgare mRNA for predicted protein, partial cds, clone: NIASHv3148E12	2613648 protein	1992	0	58	0.001	2.94748	11.5253	Up	1.72e-15	1.49e-14
MLOC_77069.1	Uncharacterized protein (Fragment)	vacuolar iron transporter-like protein	210	0	6	0.001	2.89231	11.498	Up	0.0326238	0.0651819
MLOC_51364.3	Uncharacterized protein	btb poz domain-containing protein at5g47800-like	1716	0	49	0.001	2.89062	11.4972	Up	3.41e-13	2.58e-12
AK361371	Hordeum vulgare subsp. vulgare mRNA for predicted protein, complete cds, clone: NIASHv1139A20	squamosa promoter-binding-like protein 1-like	984	0	28	0.001	2.88055	11.4921	Up	7.86e-08	3.87e-07
MLOC_75123.1	Uncharacterized protein	retrotransposon line subclass	252	0	7	0.001	2.81197	11.4574	Up	0.0181208	0.0388079
MLOC_66781.1	Uncharacterized protein	dead box helicase	834	0	23	0.001	2.79174	11.4469	Up	1.49e-06	6.35e-06
MLOC_47258.1	Uncharacterized protein (Fragment)	retrotransposon unclassified	255	0	7	0.001	2.77889	11.4403	Up	0.0181208	0.0387927
MLOC_56233.1	Sulfotransferase (EC 2.8.2.-)	flavonol sulfotransferase-like	1068	0	29	0.001	2.74878	11.4246	Up	4.37e-08	2.2e-07
AK376503	Hordeum vulgare subsp. vulgare mRNA for predicted protein, partial cds, clone: NIASHv3126B16	probable lrr receptor-like serine threonine-protein kinase at3g47570-like	3198	0	86	0.001	2.72228	11.4106	Up	1.22e-22	1.47e-21
AK358598	Hordeum vulgare subsp. vulgare mRNA for predicted protein, complete cds, clone: NIASHv1079K10	leucoanthocyanidin dioxygenase	1056	0	28	0.001	2.68415	11.3903	Up	7.86e-08	3.87e-07
MLOC_5353.1	Uncharacterized protein	2614115 protein	771	0	20	0.001	2.62596	11.3586	Up	8.68e-06	3.38e-05
MLOC_68332.1	Uncharacterized protein (Fragment)	reverse transcriptase	156	0	4	0.001	2.59566	11.3419	Up	0.105742	0.177532
MLOC_12108.2	Uncharacterized protein	598875 os11g0249300	2283	0	58	0.001	2.57179	11.3286	Up	1.72e-15	1.49e-14
MLOC_23302.1	Uncharacterized protein	retrotransposon unclassified	513	0	13	0.001	2.5653	11.3249	Up	0.000532154	0.00157796
MLOC_15577.2	Uncharacterized protein (Fragment)	thymocyte nuclear protein 1-like	237	0	6	0.001	2.56281	11.3235	Up	0.0326238	0.0654514
MLOC_53940.1	Uncharacterized protein	2831968 ternary complex factor-like	1563	0	39	0.001	2.52591	11.3026	Up	1.22e-10	7.7e-10
MLOC_111.1	Uncharacterized protein	cysteine-rich receptor-like protein kinase 23-like	201	0	5	0.001	2.51818	11.2982	Up	0.0587342	0.108339
MLOC_11249.1	Histone-lysine N-methyltransferase (EC 2.1.1.43)	set domain	282	0	7	0.001	2.51282	11.2951	Up	0.0181208	0.0388194
AK353743	Hordeum vulgare subsp. vulgare mRNA for predicted protein, complete cds, clone: NIASHv1002G20	1251050 os08g0138900	363	0	9	0.001	2.50986	11.2934	Up	0.00559068	0.0135808
MLOC_78906.1	Uncharacterized protein (Fragment)	af466646_7 polyprotein	204	0	5	0.001	2.48115	11.2768	Up	0.0587342	0.108312
MLOC_79568.1	Predicted protein (Uncharacterized protein)	early nodulin-like protein 3 precursor	612	0	15	0.001	2.48115	11.2768	Up	0.000164182	0.000531279
AK353778	Hordeum vulgare subsp. vulgare mRNA for predicted protein, partial cds, clone: NIASHv1002L08	probable receptor-like protein kinase at1g67000-like	1065	0	26	0.001	2.47136	11.2711	Up	2.55e-07	1.18e-06
AK374609	Hordeum vulgare subsp. vulgare mRNA for predicted protein, complete cds, clone: NIASHv3070I06	1850646 os08g0557300	1032	0	25	0.001	2.4523	11.2599	Up	4.59e-07	2.07e-06
MLOC_976.1	Uncharacterized protein	PREDICTED: uncharacterized protein LOC100824735	210	0	5	0.001	2.41026	11.235	Up	0.0587342	0.108138
AK363491	Hordeum vulgare subsp. vulgare mRNA for predicted protein, complete cds, clone: NIASHv2015O23	2608474 protein	1179	0	28	0.001	2.40413	11.2313	Up	7.86e-08	3.87e-07
MLOC_53242.1	Uncharacterized protein	PREDICTED: uncharacterized protein LOC100836241	972	0	23	0.001	2.39538	11.226	Up	1.49e-06	6.35e-06
MLOC_43541.2	Uncharacterized protein	zinc finger mym-type protein 1-like	339	0	8	0.001	2.38893	11.2221	Up	0.0100652	0.0229275
MLOC_80582.2	Uncharacterized protein	1634460 os05g0219300	345	0	8	0.001	2.34738	11.1968	Up	0.0100652	0.0229299
MLOC_29207.2	Uncharacterized protein	724603 os11g0678200	957	0	22	0.001	2.32715	11.1843	Up	2.68e-06	1.11e-05
MLOC_65368.1	Predicted protein (Uncharacterized protein)	2252209 tpa: saur55-auxin-responsive saur family member	435	0	10	0.001	2.32715	11.1843	Up	0.00310532	0.00796988
MLOC_15135.2	Uncharacterized protein	predicted protein	219	0	5	0.001	2.31121	11.1744	Up	0.0587342	0.108257
MLOC_68278.1	Uncharacterized protein	1908575 ferredoxin-3	453	0	10	0.001	2.23468	11.1259	Up	0.00310532	0.00797738
MLOC_23483.1	Uncharacterized protein	dynein light chain	318	0	7	0.001	2.22835	11.1218	Up	0.0181208	0.0387889
MLOC_5165.1	Predicted protein (Uncharacterized protein)	2881450 nac domain protein nac1	930	0	20	0.001	2.17701	11.0881	Up	8.68e-06	3.38e-05
MLOC_55265.2	Predicted protein (Uncharacterized protein)	1030669 burp domain-containing protein	1122	0	24	0.001	2.16537	11.0804	Up	8.26e-07	3.63e-06
MLOC_77870.1	Uncharacterized protein	retrotransposon unclassified	282	0	6	0.001	2.15385	11.0727	Up	0.0326238	0.0654755
MLOC_18956.1	Uncharacterized protein	cold shock protein-1 precursor	282	0	6	0.001	2.15385	11.0727	Up	0.0326238	0.0654094
AK367135	Hordeum vulgare subsp. vulgare mRNA for predicted protein, complete cds, clone: NIASHv2051O03	2612587 protein	282	0	6	0.001	2.15385	11.0727	Up	0.0326238	0.0651939
MLOC_13474.1	Uncharacterized protein	PREDICTED: uncharacterized protein LOC100824735	237	0	5	0.001	2.13567	11.0605	Up	0.0587342	0.108513
AK371433	Hordeum vulgare subsp. vulgare mRNA for predicted protein, complete cds, clone: NIASHv2133P15	bcl-2 binding anthanogene-1	777	0	16	0.001	2.08455	11.0255	Up	9.12e-05	0.000306404
MLOC_12844.1	Uncharacterized protein	galactoside 2-alpha-l-fucosyltransferase-like	1167	0	24	0.001	2.08187	11.0237	Up	8.26e-07	3.63e-06
MLOC_34231.1	Uncharacterized protein (Fragment)	retrotransposon ty1-copia subclass	195	0	4	0.001	2.07653	11.02	Up	0.105742	0.177901
MLOC_77065.1	Uncharacterized protein	retrotransposon line subclass	195	0	4	0.001	2.07653	11.02	Up	0.105742	0.17786
MLOC_28168.1	Uncharacterized protein (Fragment)	reverse transcriptase	246	0	5	0.001	2.05754	11.0067	Up	0.0587342	0.108111
MLOC_74282.1	Uncharacterized protein	transposon mutator sub-class	792	0	16	0.001	2.04507	10.9979	Up	9.12e-05	0.000306735
AK372807	Hordeum vulgare subsp. vulgare mRNA for predicted protein, complete cds, clone: NIASHv3013G11	predicted protein	693	0	14	0.001	2.04507	10.9979	Up	0.000295584	0.000912279
MLOC_76508.1	Uncharacterized protein	major allergen phl p 5	894	0	18	0.001	2.03821	10.9931	Up	2.81e-05	0.000102207
MLOC_62265.2	E3 ubiquitin-protein ligase (EC 6.3.2.-)	e3 ubiquitin-protein ligase sina-like 10-like	897	0	18	0.001	2.03139	10.9883	Up	2.81e-05	0.000102258
AK358756	Hordeum vulgare subsp. vulgare mRNA for predicted protein, partial cds, clone: NIASHv1082K03	850952 harpin-induced -like	201	0	4	0.001	2.01454	10.9762	Up	0.105742	0.178231
MLOC_62402.1	Uncharacterized protein	2598192 os01g0793800	303	0	6	0.001	2.00457	10.9691	Up	0.0326238	0.0655176
MLOC_72967.1	Predicted protein (Uncharacterized protein)	1294591 os05g0516100	354	0	7	0.001	2.00174	10.967	Up	0.0181208	0.0387813
MLOC_71542.1	Uncharacterized protein	reverse transcriptase	153	0	3	0.001	1.98492	10.9549	Up	0.190372	0.284334
MLOC_9415.1	Uncharacterized protein	photosystem i assembly protein ycf4	102	0	2	0.001	1.98492	10.9549	Up	0.342736	0.450842
MLOC_8219.1	Uncharacterized protein (Fragment)		156	0	3	0.001	1.94675	10.9268	Up	0.190372	0.283791
AK365704	Hordeum vulgare subsp. vulgare mRNA for predicted protein, complete cds, clone: NIASHv2036H18	2163746 nbs-lrr class disease resistance protein	2868	0	55	0.001	1.94132	10.9228	Up	1e-14	8.35e-14
MLOC_29271.1	Uncharacterized protein	713017 ring u-box domain-containing protein	471	0	9	0.001	1.93435	10.9176	Up	0.00559068	0.0135914
MLOC_21592.1	Uncharacterized protein	2549259 at1g34320	315	0	6	0.001	1.92821	10.913	Up	0.0326238	0.0654154
MLOC_49646.1	Uncharacterized protein (Fragment)	retrotransposon unclassified	369	0	7	0.001	1.92037	10.9072	Up	0.0181208	0.0387396
MLOC_31569.1	Uncharacterized protein	ribonuclease h-like protein	369	0	7	0.001	1.92037	10.9072	Up	0.0181208	0.038713
MLOC_35455.1	Uncharacterized protein (Fragment)	retrotransposon unclassified	375	0	7	0.001	1.88964	10.8839	Up	0.0181208	0.0387244
MLOC_42012.1	Uncharacterized protein	retrotransposon line subclass	378	0	7	0.001	1.87465	10.8724	Up	0.0181208	0.0388232
MLOC_39825.1	Uncharacterized protein	2881578 os02g0620400	327	0	6	0.001	1.85745	10.8591	Up	0.0326238	0.0654935
MLOC_34608.2	Uncharacterized protein	1635128 os06g0612950	546	0	10	0.001	1.85404	10.8565	Up	0.00310532	0.00798208
AK374718	Hordeum vulgare subsp. vulgare mRNA for predicted protein, partial cds, clone: NIASHv3074B15	ubiquitin-protein expressed	984	0	18	0.001	1.85178	10.8547	Up	2.81e-05	0.000102156
MLOC_51594.1	Uncharacterized protein	1635363 os07g0199250	882	0	16	0.001	1.83639	10.8427	Up	9.12e-05	0.000306499
AK368913	Hordeum vulgare subsp. vulgare mRNA for predicted protein, complete cds, clone: NIASHv2082C12	nac domain-containing protein 18	663	0	12	0.001	1.83223	10.8394	Up	0.000958064	0.0027141
AK366178	Hordeum vulgare subsp. vulgare mRNA for predicted protein, complete cds, clone: NIASHv2040O04	transposon en spm sub-class	1443	0	26	0.001	1.82398	10.8329	Up	2.55e-07	1.18e-06
AK375437	Hordeum vulgare subsp. vulgare mRNA for predicted protein, complete cds, clone: NIASHv3094E12	2799845 f-box protein family-like	783	0	14	0.001	1.81	10.8218	Up	0.000295584	0.000913053
AK373513	Hordeum vulgare subsp. vulgare mRNA for predicted protein, complete cds, clone: NIASHv3033I05	hlh dna-binding domain superfamily protein	729	0	13	0.001	1.80521	10.818	Up	0.000532154	0.00157968
AK249296.1	-	predicted protein	393	0	7	0.001	1.80309	10.8163	Up	0.0181208	0.0387585
MLOC_52764.1	Uncharacterized protein (Fragment)	50317 ribosomal rna apurinic site specific lyase-like	339	0	6	0.001	1.7917	10.8071	Up	0.0326238	0.0653434
MLOC_36992.1	Uncharacterized protein	2550860 calmodulin	453	0	8	0.001	1.78774	10.8039	Up	0.0100652	0.0229538
MLOC_37268.1	Pectinesterase (EC 3.1.1.11)	pectin methylesterase	1254	0	22	0.001	1.77598	10.7944	Up	2.68e-06	1.11e-05
MLOC_53949.2	Uncharacterized protein	piriformospora indica-insensitive protein 2-like	1371	0	24	0.001	1.77209	10.7912	Up	8.26e-07	3.63e-06
MLOC_48508.1	Uncharacterized protein (Fragment)	ribonuclease h protein at1g65750-like	462	0	8	0.001	1.75292	10.7755	Up	0.0100652	0.0229394
MLOC_33841.1	Uncharacterized protein	interferon-induced gtp-binding protein	405	0	7	0.001	1.74967	10.7729	Up	0.0181208	0.0388308
MLOC_38000.1	Uncharacterized protein	retrotransposon unclassified	522	0	9	0.001	1.74536	10.7693	Up	0.00559068	0.0135929
MLOC_76253.1	Uncharacterized protein		348	0	6	0.001	1.74536	10.7693	Up	0.0326238	0.065164
MLOC_55490.5	Uncharacterized protein	60s ribosomal protein l18a-1-like	351	0	6	0.001	1.73044	10.7569	Up	0.0326238	0.0653374
MLOC_33785.1	Uncharacterized protein		294	0	5	0.001	1.72161	10.7495	Up	0.0587342	0.108202
AK369990	Hordeum vulgare subsp. vulgare mRNA for predicted protein, complete cds, clone: NIASHv2102N15	723945 os11g0100300	2592	0	44	0.001	1.71843	10.7469	Up	6.46e-12	4.49e-11
MLOC_56512.1	Uncharacterized protein	spz12_orysj ame: full= serpin-z12 ame: full= 12	1314	0	22	0.001	1.69488	10.727	Up	2.68e-06	1.11e-05
MLOC_44918.1	Uncharacterized protein	flavonol synthase flavanone 3-hydroxylase	603	0	10	0.001	1.67879	10.7132	Up	0.00310532	0.00796707
AK377088	Hordeum vulgare subsp. vulgare mRNA for predicted protein, complete cds, clone: NIASHv3148A11	2770532 mitochondrial+prohibitin+complex+protein+2	1749	0	29	0.001	1.6785	10.713	Up	4.37e-08	2.2e-07
MLOC_78515.1	Uncharacterized protein	2607290 protein	1209	0	20	0.001	1.67462	10.7096	Up	8.68e-06	3.38e-05
MLOC_67061.1	Uncharacterized protein	disease resistance response protein 206-like	546	0	9	0.001	1.66864	10.7045	Up	0.00559068	0.0135793
MLOC_12999.1	Uncharacterized protein	two-component response regulator arr12-like	1704	0	28	0.001	1.66342	10.6999	Up	7.86e-08	3.87e-07
AK356510	Hordeum vulgare subsp. vulgare mRNA for predicted protein, complete cds, clone: NIASHv1035K19	2883541 at-hook protein 1	1098	0	18	0.001	1.65952	10.6966	Up	2.81e-05	0.000102327
MLOC_33637.1	Uncharacterized protein (Fragment)	ribonuclease h protein at1g65750-like	309	0	5	0.001	1.63804	10.6778	Up	0.0587342	0.108211
MLOC_69588.2	Uncharacterized protein	8-amino-7-oxononanoate synthase	1362	0	22	0.001	1.63515	10.6752	Up	2.68e-06	1.11e-05
MLOC_20490.1	Uncharacterized protein		186	0	3	0.001	1.63276	10.6731	Up	0.190372	0.284665
MLOC_32666.1	Uncharacterized protein	retrotransposon line subclass	312	0	5	0.001	1.62229	10.6638	Up	0.0587342	0.108486
MLOC_15042.1	Predicted protein (Uncharacterized protein)	2605986 protein	1131	0	18	0.001	1.6111	10.6538	Up	2.81e-05	0.000102293
MLOC_47986.1	Uncharacterized protein	ac103891_8 transposase	189	0	3	0.001	1.60684	10.65	Up	0.190372	0.285428
MLOC_29777.1	Uncharacterized protein	retrotransposon unclassified	252	0	4	0.001	1.60684	10.65	Up	0.105742	0.177709
MLOC_6871.2	Uncharacterized protein	1851899 os12g0102700	951	0	15	0.001	1.5967	10.6409	Up	0.000164182	0.0005312
MLOC_8870.1	3-ketoacyl-CoA synthase (EC 2.3.1.-)	3-ketoacyl- synthase 6-like	1461	0	23	0.001	1.59364	10.6381	Up	1.49e-06	6.35e-06
MLOC_47123.1	Uncharacterized protein (Fragment)	1023481 os03g0594700	321	0	5	0.001	1.5768	10.6228	Up	0.0587342	0.108348
AK248736.1	-	citrate synthase 4	1416	0	22	0.001	1.5728	10.6191	Up	2.68e-06	1.11e-05
MLOC_67727.1	Predicted protein (Uncharacterized protein)	phytosulfokine receptor 2-like	855	0	13	0.001	1.53918	10.5879	Up	0.000532154	0.00157753
MLOC_920.1	Uncharacterized protein (Fragment)	ribonuclease h protein at1g65750-like	132	0	2	0.001	1.5338	10.5829	Up	0.342736	0.452013
MLOC_69959.1	Pectinesterase (EC 3.1.1.11)	probable pectinesterase pectinesterase inhibitor 21-like	1386	0	21	0.001	1.5338	10.5829	Up	4.82e-06	1.93e-05
MLOC_67226.1	Uncharacterized protein (Fragment)	retrotransposon line subclass	264	0	4	0.001	1.5338	10.5829	Up	0.105742	0.177559
AK358680	Hordeum vulgare subsp. vulgare mRNA for predicted protein, complete cds, clone: NIASHv1081G17	f-box family protein	1338	0	20	0.001	1.51317	10.5634	Up	8.68e-06	3.37e-05
AK369306	Hordeum vulgare subsp. vulgare mRNA for predicted protein, complete cds, clone: NIASHv2088M11	2605712 protein	669	0	10	0.001	1.51317	10.5634	Up	0.00310532	0.00796333
MLOC_62084.1	Uncharacterized protein	pectinesterase inhibitor domain containing protein	603	0	9	0.001	1.51091	10.5612	Up	0.00559068	0.0135763
MLOC_63963.2	Predicted protein (Uncharacterized protein)	dirigent-like protein pdir17	543	0	8	0.001	1.49143	10.5425	Up	0.0100652	0.0229754
MLOC_74546.1	Uncharacterized protein	retrotransposon unclassified	552	0	8	0.001	1.46711	10.5188	Up	0.0100652	0.0229874
MLOC_42650.1	Uncharacterized protein	hypothetical protein SORBIDRAFT_06g020403	138	0	2	0.001	1.46711	10.5188	Up	0.342736	0.451277
MLOC_29914.1	Uncharacterized protein (Fragment)	ribonuclease h protein at1g65750-like	276	0	4	0.001	1.46711	10.5188	Up	0.105742	0.177614
MLOC_24563.1	Uncharacterized protein	transposon en spm sub-class	492	0	7	0.001	1.44028	10.4921	Up	0.0181208	0.0387775
MLOC_72683.1	Predicted protein (Uncharacterized protein)	2248971 gdu1	492	0	7	0.001	1.44028	10.4921	Up	0.0181208	0.0387623
MLOC_6403.2	Uncharacterized protein	ap2 erf domain-containing transcription factor	492	0	7	0.001	1.44028	10.4921	Up	0.0181208	0.0387206
MLOC_4113.1	Uncharacterized protein (Fragment)	retrotransposon line subclass	213	0	3	0.001	1.42579	10.4775	Up	0.190372	0.283849
MLOC_61475.1	Uncharacterized protein (Fragment)	zinc finger mym-type protein 1-like	498	0	7	0.001	1.42292	10.4746	Up	0.0181208	0.0387054
AK366265	Hordeum vulgare subsp. vulgare mRNA for predicted protein, partial cds, clone: NIASHv2041J01	peptide transporter ptr2-like	1431	0	20	0.001	1.41483	10.4664	Up	8.68e-06	3.38e-05
MLOC_11869.1	Predicted protein (Uncharacterized protein)	udp-n-acetylglucosamine--n-acetylmuramyl- pyrophosphoryl-undecaprenol n-acetylglucosamine transferase-like	288	0	4	0.001	1.40598	10.4574	Up	0.105742	0.178921
MLOC_5359.1	Uncharacterized protein	protein maoc-like	504	0	7	0.001	1.40598	10.4574	Up	0.0181208	0.0387471
MLOC_52972.1	Uncharacterized protein (Fragment)	timeless c-term domain and homeodomain protein	288	0	4	0.001	1.40598	10.4574	Up	0.105742	0.177805
MLOC_62332.1	Peroxidase (EC 1.11.1.7)	peroxidase 15-like	1011	0	14	0.001	1.40181	10.4531	Up	0.000295584	0.000912537
AK250996.1	-	815303 early nodulin	291	0	4	0.001	1.39149	10.4424	Up	0.105742	0.17888
MLOC_67579.3	Uncharacterized protein	predicted protein	219	0	3	0.001	1.38672	10.4375	Up	0.190372	0.284373
MLOC_31965.1	Uncharacterized protein (Fragment)	abc1 protein at2g40090-like	219	0	3	0.001	1.38672	10.4375	Up	0.190372	0.283888
MLOC_31208.2	Uncharacterized protein	chaperone protein 1-like	1683	0	23	0.001	1.38343	10.434	Up	1.49e-06	6.35e-06
AK357410	Hordeum vulgare subsp. vulgare mRNA for predicted protein, complete cds, clone: NIASHv1052K04	phd finger protein	879	0	12	0.001	1.38199	10.4325	Up	0.000958064	0.00271516
MLOC_2395.1	Uncharacterized protein	resistance protein rga2	1392	0	19	0.001	1.38174	10.4323	Up	1.56e-05	5.88e-05
MLOC_55993.1	Uncharacterized protein	probable non-specific lipid-transfer protein akcs9-like	294	0	4	0.001	1.37729	10.4276	Up	0.105742	0.178783
AK363122	Hordeum vulgare subsp. vulgare mRNA for predicted protein, complete cds, clone: NIASHv2012O22	1666954 os03g0242300	735	0	10	0.001	1.37729	10.4276	Up	0.00310532	0.00798302
MLOC_65597.1	Uncharacterized protein (Fragment)	ribonuclease h protein at1g65750-like	222	0	3	0.001	1.36798	10.4178	Up	0.190372	0.285624
MLOC_51400.1	Uncharacterized protein	1634148 partial	225	0	3	0.001	1.34974	10.3985	Up	0.190372	0.285781
MLOC_28364.1	Uncharacterized protein (Fragment)	1849446 os05g0133900	225	0	3	0.001	1.34974	10.3985	Up	0.190372	0.283713
MLOC_21667.1	Uncharacterized protein	1634460 os05g0219300	453	0	6	0.001	1.34081	10.3889	Up	0.0326238	0.0654635
AK249590.1	-	2250088 60s ribosomal protein l13-2	624	2	3342	0.405396	542.169	10.3852	Up	0	0
MLOC_27023.1	Uncharacterized protein	hat family dimerisation domain containing protein	303	0	4	0.001	1.33638	10.3841	Up	0.105742	0.178977
MLOC_32827.1	Uncharacterized protein (Fragment)	1357442 retrotransposon unclassified	153	0	2	0.001	1.32328	10.3699	Up	0.342736	0.457988
MLOC_33914.1	Uncharacterized protein (Fragment)	predicted protein	153	0	2	0.001	1.32328	10.3699	Up	0.342736	0.455674
MLOC_27015.1	Uncharacterized protein	retrotransposon unclassified	231	0	3	0.001	1.31469	10.3605	Up	0.190372	0.284821
MLOC_68291.2	Uncharacterized protein	PREDICTED: uncharacterized protein LOC100824552	465	0	6	0.001	1.3062	10.3512	Up	0.0326238	0.0651879
MLOC_75135.1	Uncharacterized protein	ap2 erf and b3 domain-containing transcription repressor tem1-like	1086	0	14	0.001	1.305	10.3498	Up	0.000295584	0.000912795
AK373374	Hordeum vulgare subsp. vulgare mRNA for predicted protein, partial cds, clone: NIASHv3028M14	probable glucan endo- -beta-glucosidase a6-like	1242	0	16	0.001	1.3041	10.3488	Up	9.12e-05	0.00030664
MLOC_55815.1	Uncharacterized protein	ring zinc finger domain superfamily protein	546	0	7	0.001	1.29783	10.3419	Up	0.0181208	0.0388346
MLOC_42947.1	Uncharacterized protein (Fragment)	minichromosomal maintenance factor	156	0	2	0.001	1.29783	10.3419	Up	0.342736	0.456981
MLOC_7873.1	Uncharacterized protein (Fragment)	2835145 nadh-plastoquinone oxidoreductase subunit i	234	0	3	0.001	1.29783	10.3419	Up	0.190372	0.284237
MLOC_33210.1	Uncharacterized protein (Fragment)	af466646_7 polyprotein	234	0	3	0.001	1.29783	10.3419	Up	0.190372	0.283985
MLOC_9076.1	Uncharacterized protein (Fragment)	cysteine-rich receptor-like protein kinase 23-like	237	0	3	0.001	1.2814	10.3235	Up	0.190372	0.285134
MLOC_31542.1	Uncharacterized protein (Fragment)	retrotransposon unclassified	237	0	3	0.001	1.2814	10.3235	Up	0.190372	0.283907
MLOC_10140.1	Uncharacterized protein	calcineurin b-like protein	639	0	8	0.001	1.26737	10.3076	Up	0.0100652	0.0229826
AK250054.1	-	f-box lrr-repeat protein 14-like	1455	0	18	0.001	1.25234	10.2904	Up	2.81e-05	0.000102276
AK353780	Hordeum vulgare subsp. vulgare mRNA for predicted protein, complete cds, clone: NIASHv1002L14	upf0481 protein at3g47200-like	1494	0	18	0.001	1.21965	10.2523	Up	2.81e-05	0.000102139
MLOC_46348.1	Uncharacterized protein	726304 os12g0422200	249	0	3	0.001	1.21965	10.2523	Up	0.190372	0.283694
MLOC_60100.1	Uncharacterized protein	blue copper binding protein	585	0	7	0.001	1.21131	10.2424	Up	0.0181208	0.0387661
MLOC_55245.1	Uncharacterized protein	hypothetical protein SORBIDRAFT_09g013513	252	0	3	0.001	1.20513	10.235	Up	0.190372	0.284841
MLOC_8125.1	Uncharacterized protein		336	0	4	0.001	1.20513	10.235	Up	0.105742	0.177942
MLOC_65627.1	Uncharacterized protein	cysteine-rich receptor-like protein kinase 23-like	168	0	2	0.001	1.20513	10.235	Up	0.342736	0.451631
AK375615	Hordeum vulgare subsp. vulgare mRNA for predicted protein, complete cds, clone: NIASHv3099I02	leucine rich repeat family expressed	2028	0	24	0.001	1.198	10.2264	Up	8.26e-07	3.63e-06
MLOC_74641.2	Uncharacterized protein	599622 nb-arc domain containing expressed	2289	0	27	0.001	1.19407	10.2217	Up	1.42e-07	6.77e-07
MLOC_6820.1	Uncharacterized protein	predicted protein	600	0	7	0.001	1.18103	10.2058	Up	0.0181208	0.0387509
AK374906	Hordeum vulgare subsp. vulgare mRNA for predicted protein, complete cds, clone: NIASHv3079N11	tpa: cyclin superfamily	1122	0	13	0.001	1.17291	10.1959	Up	0.000532154	0.00157925
AK373607	Hordeum vulgare subsp. vulgare mRNA for predicted protein, complete cds, clone: NIASHv3036G24	lob domain-containing family protein	777	0	9	0.001	1.17256	10.1954	Up	0.00559068	0.0135869
MLOC_76025.1	Uncharacterized protein	2616584 protein	264	0	3	0.001	1.15035	10.1679	Up	0.190372	0.283655
MLOC_64586.1	Uncharacterized protein	retrotransposon unclassified	441	0	5	0.001	1.14774	10.1646	Up	0.0587342	0.108403
MLOC_67680.1	Uncharacterized protein	retroelement protein	177	0	2	0.001	1.14385	10.1597	Up	0.342736	0.453712
MLOC_9443.1	Uncharacterized protein (Fragment)	cysteine-rich receptor-like protein kinase 23-like	177	0	2	0.001	1.14385	10.1597	Up	0.342736	0.452587
MLOC_66252.1	Uncharacterized protein	transcription factor rf2b-like	798	0	9	0.001	1.1417	10.157	Up	0.00559068	0.0135823
AK368401	Hordeum vulgare subsp. vulgare mRNA for predicted protein, complete cds, clone: NIASHv2073B01	1411861 os11g0278300	1779	0	20	0.001	1.13806	10.1524	Up	8.68e-06	3.38e-05
MLOC_6122.1	Uncharacterized protein	opa3-like protein	534	0	6	0.001	1.13743	10.1516	Up	0.0326238	0.0655538
AK357554	Hordeum vulgare subsp. vulgare mRNA for predicted protein, complete cds, clone: NIASHv1056H03	60s ribosomal protein l28	447	0	5	0.001	1.13234	10.1451	Up	0.0587342	0.10822
MLOC_42135.1	Uncharacterized protein (Fragment)	retrotransposon line subclass	360	0	4	0.001	1.12479	10.1354	Up	0.105742	0.177846
MLOC_33668.1	Uncharacterized protein (Fragment)	ribonuclease h protein at1g65750-like	360	0	4	0.001	1.12479	10.1354	Up	0.105742	0.177764
MLOC_56413.1	Uncharacterized protein	subtilisin-like protease sdd1-like	2256	0	25	0.001	1.1218	10.1316	Up	4.59e-07	2.07e-06
MLOC_4150.2	Uncharacterized protein	25536 os09g0459200	273	0	3	0.001	1.11243	10.1195	Up	0.190372	0.284548
MLOC_24786.4	Uncharacterized protein	basic blue	366	0	4	0.001	1.10635	10.1116	Up	0.105742	0.178603
MLOC_76092.1	Uncharacterized protein (Fragment)	zinc finger	183	0	2	0.001	1.10635	10.1116	Up	0.342736	0.4493
AK372683	Hordeum vulgare subsp. vulgare mRNA for predicted protein, complete cds, clone: NIASHv3009E08	1267951 os03g0663900	642	0	7	0.001	1.10376	10.1082	Up	0.0181208	0.0387699
AK369149	Hordeum vulgare subsp. vulgare mRNA for predicted protein, partial cds, clone: NIASHv2085N19	protein	1290	0	14	0.001	1.09863	10.1015	Up	0.000295584	0.000911892
MLOC_54691.1	Uncharacterized protein	f-box domain containing protein	1206	0	13	0.001	1.09121	10.0917	Up	0.000532154	0.00157839
MLOC_63744.1	Uncharacterized protein	2840914 os08g0142900	558	0	6	0.001	1.0885	10.0881	Up	0.0326238	0.0652835
MLOC_49761.1	CASP-like protein	casp-like protein at3g53850-like	465	0	5	0.001	1.0885	10.0881	Up	0.0587342	0.108147
MLOC_42209.1	Uncharacterized protein	omega-hydroxypalmitate o-feruloyl transferase-like	933	0	10	0.001	1.085	10.0835	Up	0.00310532	0.0079727
MLOC_17192.1	Uncharacterized protein	plant-specific domain tigr01568 family protein	747	0	8	0.001	1.08413	10.0823	Up	0.0100652	0.0229658
MLOC_8430.1	Uncharacterized protein	ap2 erebp-like protein	936	0	10	0.001	1.08153	10.0789	Up	0.00310532	0.00796801
AK362495	Hordeum vulgare subsp. vulgare mRNA for predicted protein, complete cds, clone: NIASHv2006C19	peptidyl-prolyl cis-trans isomerase cyp40-like	1137	0	12	0.001	1.0684	10.0612	Up	0.000958064	0.00271763
MLOC_52861.1	Uncharacterized protein	727075 os12g0599800	570	0	6	0.001	1.06559	10.0574	Up	0.0326238	0.0653553
MLOC_40221.1	Uncharacterized protein (Fragment)	retrotransposon unclassified	477	0	5	0.001	1.06112	10.0514	Up	0.0587342	0.108193
MLOC_64430.1	Uncharacterized protein	f-box protein	1623	0	17	0.001	1.06034	10.0503	Up	5.07e-05	0.000177426
MLOC_42781.1	Uncharacterized protein	retrotransposon line subclass	192	0	2	0.001	1.05449	10.0423	Up	0.342736	0.452204
MLOC_54160.1	Uncharacterized protein	f-box fbd lrr-repeat protein	1254	0	13	0.001	1.04944	10.0354	Up	0.000532154	0.00157861
AK367686	Hordeum vulgare subsp. vulgare mRNA for predicted protein, complete cds, clone: NIASHv2060G03	nucleotide binding protein	966	0	10	0.001	1.04794	10.0333	Up	0.00310532	0.00798772
MLOC_27958.1	Uncharacterized protein	retrotransposon ty1-copia subclass	291	0	3	0.001	1.04362	10.0274	Up	0.190372	0.28447
MLOC_30070.1	Uncharacterized protein (Fragment)	retrotransposon unclassified	291	0	3	0.001	1.04362	10.0274	Up	0.190372	0.284218
MLOC_74263.1	Uncharacterized protein	1665977 os03g0342100	486	0	5	0.001	1.04147	10.0244	Up	0.0587342	0.108422
MLOC_23006.1	Uncharacterized protein	papain-like cysteine proteinase	1167	0	12	0.001	1.04093	10.0237	Up	0.000958064	0.00271727
MLOC_12960.1	Uncharacterized protein	retrotransposon unclassified	876	0	9	0.001	1.04004	10.0224	Up	0.00559068	0.013596
MLOC_42238.1	Uncharacterized protein	835765 os01g0673300	786	0	8	0.001	1.03034	10.0089	Up	0.0100652	0.022961
MLOC_46349.1	Uncharacterized protein	reverse transcriptase	393	0	4	0.001	1.03034	10.0089	Up	0.105742	0.178451
MLOC_32011.1	Uncharacterized protein	nuclease harbi1-like	198	0	2	0.001	1.02253	9.99793	Up	0.342736	0.455286
MLOC_36682.1	Uncharacterized protein	nuclear transcription factor y subunit b-6-like	594	0	6	0.001	1.02253	9.99793	Up	0.0326238	0.0651283
AK369274	Hordeum vulgare subsp. vulgare mRNA for predicted protein, complete cds, clone: NIASHv2088C17	2612187 protein	597	0	6	0.001	1.0174	9.99066	Up	0.0326238	0.0653494
AK374018	Hordeum vulgare subsp. vulgare mRNA for predicted protein, partial cds, clone: NIASHv3051E03	1848851 partial	2199	0	22	0.001	1.01277	9.98409	Up	2.68e-06	1.11e-05
MLOC_15504.1	Uncharacterized protein (Fragment)	retrotransposon unclassified	300	0	3	0.001	1.01231	9.98343	Up	0.190372	0.285173
MLOC_41918.1	Uncharacterized protein (Fragment)	reverse transcriptase	300	0	3	0.001	1.01231	9.98343	Up	0.190372	0.28449
MLOC_78710.1	Uncharacterized protein (Fragment)	retrotransposon line subclass	201	0	2	0.001	1.00727	9.97624	Up	0.342736	0.45407
MLOC_80490.1	Uncharacterized protein	retrotransposon unclassified	402	0	4	0.001	1.00727	9.97624	Up	0.105742	0.177915
MLOC_73497.2	Predicted protein (Uncharacterized protein)	nuclease s1	909	0	9	0.001	1.00229	9.96908	Up	0.00559068	0.0135975
MLOC_22078.1	Uncharacterized protein	chaperone protein dnaj chloroplastic-like	303	0	3	0.001	1.00229	9.96908	Up	0.190372	0.284121
AK372924	Hordeum vulgare subsp. vulgare mRNA for predicted protein, partial cds, clone: NIASHv3016A04	1849417 os05g0148500	1011	0	10	0.001	1.00129	9.96765	Up	0.00310532	0.00798584
MLOC_78638.1	Uncharacterized protein	polcalcin jun o 2	507	0	5	0.001	0.998332	9.96338	Up	0.0587342	0.108321
MLOC_2384.1	Uncharacterized protein (Fragment)	ac093178_4 reverse transcriptase	204	0	2	0.001	0.992459	9.95486	Up	0.342736	0.452341
MLOC_10485.1	Uncharacterized protein	flavoprotein wrba-like	612	0	6	0.001	0.992459	9.95486	Up	0.0326238	0.0652536
MLOC_16077.1	Predicted protein (Uncharacterized protein)	1635363 os07g0199250	1029	0	10	0.001	0.983779	9.94219	Up	0.00310532	0.0079896
MLOC_58790.1	Predicted protein (Uncharacterized protein)	848115 glutaredoxin-like protein	309	0	3	0.001	0.982824	9.94079	Up	0.190372	0.285565
MLOC_9466.2	Uncharacterized protein	protein far1-related sequence 5-like	309	0	3	0.001	0.982824	9.94079	Up	0.190372	0.284958
AK249446.1	-	2608046 protein	207	0	2	0.001	0.978076	9.9338	Up	0.342736	0.454043
MLOC_52865.1	Uncharacterized protein	nadp-dependent alkenal double bond reductase p1-like	1038	0	10	0.001	0.975249	9.92963	Up	0.00310532	0.00797176
MLOC_37944.1	Predicted protein (Uncharacterized protein)	724441 os12g0117800	936	0	9	0.001	0.973374	9.92685	Up	0.00559068	0.0136035
AK364303	Hordeum vulgare subsp. vulgare mRNA for predicted protein, complete cds, clone: NIASHv2023J11	871838 dehydrogenase	1251	0	12	0.001	0.971039	9.92339	Up	0.000958064	0.00271833
MLOC_80197.1	Uncharacterized protein	ethylene-responsive transcription factor 1b-like	837	0	8	0.001	0.967559	9.91821	Up	0.0100652	0.0229514
MLOC_29502.1	Uncharacterized protein	retrotransposon protein	315	0	3	0.001	0.964103	9.91304	Up	0.190372	0.285447
MLOC_2327.1	Uncharacterized protein	ribosomal protein	210	0	2	0.001	0.964103	9.91304	Up	0.342736	0.4503
AK360305	Hordeum vulgare subsp. vulgare mRNA for predicted protein, complete cds, clone: NIASHv1115B19	863875 cyt-p450 monooxygenase	1476	0	14	0.001	0.960184	9.90717	Up	0.000295584	0.000913441
MLOC_54699.1	Uncharacterized protein	retrotransposon ty1-copia subclass	1374	0	13	0.001	0.957788	9.90356	Up	0.000532154	0.00157882
MLOC_9271.1	Uncharacterized protein (Fragment)	reverse transcriptase	213	0	2	0.001	0.950524	9.89258	Up	0.342736	0.459337
MLOC_28394.1	Uncharacterized protein (Fragment)	transposon mariner sub-class	213	0	2	0.001	0.950524	9.89258	Up	0.342736	0.453877
MLOC_43280.1	Uncharacterized protein	retrotransposon unclassified	426	0	4	0.001	0.950524	9.89258	Up	0.105742	0.178066
MLOC_18481.1	Uncharacterized protein	727801 os12g0548800	213	0	2	0.001	0.950524	9.89258	Up	0.342736	0.451577
MLOC_6153.1	Uncharacterized protein	galactoside 2-alpha-l-fucosyltransferase-like	1491	0	14	0.001	0.950524	9.89258	Up	0.000295584	0.000912408
MLOC_80726.1	Uncharacterized protein		213	0	2	0.001	0.950524	9.89258	Up	0.342736	0.451386
AK364343	Hordeum vulgare subsp. vulgare mRNA for predicted protein, complete cds, clone: NIASHv2024A03	cleavage and polyadenylation specificity factor 5	639	0	6	0.001	0.950524	9.89258	Up	0.0326238	0.0651521
AK361714	Hordeum vulgare subsp. vulgare mRNA for predicted protein, complete cds, clone: NIASHv1146P14	2615360 protein	1071	0	10	0.001	0.945199	9.88447	Up	0.00310532	0.00798396
MLOC_8336.1	Uncharacterized protein (Fragment)	ribonuclease h protein at1g65750-like	537	0	5	0.001	0.942559	9.88044	Up	0.0587342	0.108074
MLOC_56649.4	Uncharacterized protein	coiled-coil domain-containing protein 25-like	645	0	6	0.001	0.941682	9.8791	Up	0.0326238	0.0654214
AK364669	Hordeum vulgare subsp. vulgare mRNA for predicted protein, complete cds, clone: NIASHv2027G19	beta-amyrin synthase	2154	0	20	0.001	0.939934	9.87642	Up	8.68e-06	3.38e-05
AK358643	Hordeum vulgare subsp. vulgare mRNA for predicted protein, complete cds, clone: NIASHv1080N03	dna-directed rna polymerases and iii subunit rpabc1-like	324	0	3	0.001	0.937323	9.8724	Up	0.190372	0.285526
AK363234	Hordeum vulgare subsp. vulgare mRNA for predicted protein, complete cds, clone: NIASHv2013K03	1634039 partial	648	0	6	0.001	0.937323	9.8724	Up	0.0326238	0.0654996
MLOC_76041.1	Uncharacterized protein (Fragment)	retrotransposon line subclass	216	0	2	0.001	0.937323	9.8724	Up	0.342736	0.455507
AK373632	Hordeum vulgare subsp. vulgare mRNA for predicted protein, complete cds, clone: NIASHv3037J09	monooxygenase 1	1200	0	11	0.001	0.92795	9.8579	Up	0.00172485	0.00465272
MLOC_80489.2	Uncharacterized protein	predicted protein	438	0	4	0.001	0.924483	9.8525	Up	0.105742	0.178866
MLOC_72235.1	Uncharacterized protein	1712400 qltg3-1	438	0	4	0.001	0.924483	9.8525	Up	0.105742	0.178313
MLOC_59565.1	Uncharacterized protein (Fragment)	1637258 os11g0599101	438	0	4	0.001	0.924483	9.8525	Up	0.105742	0.177518
MLOC_81772.1	Uncharacterized protein	retrotransposon line subclass	330	0	3	0.001	0.920281	9.84593	Up	0.190372	0.284393
MLOC_35341.1	Uncharacterized protein	transposon ping pong snoopy sub-class	993	0	9	0.001	0.9175	9.84156	Up	0.00559068	0.0136005
MLOC_73474.1	Uncharacterized protein	medium-chain-fatty-acid-- ligase-like	1437	0	13	0.001	0.915798	9.83888	Up	0.000532154	0.00157903
MLOC_25370.2	Uncharacterized protein	probable atp-dependent dna helicase hfm1-like	333	0	3	0.001	0.91199	9.83287	Up	0.190372	0.284626
MLOC_16156.2	Uncharacterized protein	disease resistance protein rpp8-like	2223	0	20	0.001	0.910759	9.83093	Up	8.68e-06	3.38e-05
MLOC_72375.6	Uncharacterized protein	protein kinase superfamily protein	1005	0	9	0.001	0.906545	9.82423	Up	0.00559068	0.013605
MLOC_80168.1	Uncharacterized protein	retrotransposon unclassified	447	0	4	0.001	0.905869	9.82316	Up	0.105742	0.177983
MLOC_21993.1	Predicted protein (Uncharacterized protein)	1852178 os12g0157700	336	0	3	0.001	0.903847	9.81993	Up	0.190372	0.285702
MLOC_50740.1	Uncharacterized protein	protein p21-like	672	0	6	0.001	0.903847	9.81993	Up	0.0326238	0.0651462
MLOC_81310.1	Uncharacterized protein	reverse transcriptase	225	0	2	0.001	0.89983	9.81351	Up	0.342736	0.451005
MLOC_31289.1	Uncharacterized protein	retrotransposon line subclass	225	0	2	0.001	0.89983	9.81351	Up	0.342736	0.449678
MLOC_19551.1	Non-specific lipid-transfer protein	2648763 chain lipid binding in rice nonspecific lipid transfer protein-1 complexes from oryza sativa	360	1	1121	0.351343	315.222	9.80927	Up	3.09e-284	3.65e-282
MLOC_15680.1	Uncharacterized protein	at1g76250-like protein	453	0	4	0.001	0.893871	9.80392	Up	0.105742	0.178025
MLOC_18963.2	Predicted protein (Uncharacterized protein)	tpa: nudix hydrolase family protein	681	0	6	0.001	0.891902	9.80074	Up	0.0326238	0.0652416
MLOC_29888.1	Uncharacterized protein	ribonuclease h protein at1g65750-like	228	0	2	0.001	0.88799	9.7944	Up	0.342736	0.458128
MLOC_56540.5	Uncharacterized protein	1633035 os01g0909300	456	0	4	0.001	0.88799	9.7944	Up	0.105742	0.178644
MLOC_15777.3	Uncharacterized protein	thylakoid lumenal kda chloroplastic-like	684	0	6	0.001	0.88799	9.7944	Up	0.0326238	0.0653733
MLOC_51239.1	Uncharacterized protein	type ii nad h dehydrogenase	1719	0	15	0.001	0.883341	9.78683	Up	0.000164182	0.000530885
MLOC_65606.1	Uncharacterized protein	retrotransposon unclassified	462	0	4	0.001	0.876458	9.77554	Up	0.105742	0.177573
MLOC_20925.1	Uncharacterized protein	retrotransposon ty1-copia subclass	348	0	3	0.001	0.87268	9.76931	Up	0.190372	0.285193
MLOC_56245.1	Uncharacterized protein	pentatricopeptide repeat-containing protein at5g66520-like	930	0	8	0.001	0.870803	9.7662	Up	0.0100652	0.0229155
MLOC_51337.2	Uncharacterized protein	myb dna-binding domain superfamily protein	1281	0	11	0.001	0.869274	9.76367	Up	0.00172485	0.0046533
MLOC_41265.1	Uncharacterized protein (Fragment)	ribonuclease h protein at1g65750-like	234	0	2	0.001	0.865221	9.75692	Up	0.342736	0.457009
MLOC_76996.1	Uncharacterized protein	far-red impaired response protein	471	0	4	0.001	0.85971	9.74771	Up	0.105742	0.177819
MLOC_36305.2	Uncharacterized protein	1632502 os01g0240700	1296	0	11	0.001	0.859213	9.74687	Up	0.00172485	0.00465445
MLOC_17510.1	Uncharacterized protein	ac025296_10 reverse transcriptase	354	0	3	0.001	0.857889	9.74465	Up	0.190372	0.285349
MLOC_32724.1	Uncharacterized protein	ribonuclease h protein at1g65750-like	237	0	2	0.001	0.854269	9.73855	Up	0.342736	0.456898
MLOC_66230.1	Uncharacterized protein	vacuolar iron transporter homolog 4-like	474	0	4	0.001	0.854269	9.73855	Up	0.105742	0.177464
MLOC_48781.2	Predicted protein (Uncharacterized protein)	1634258 os04g0643800	474	0	4	0.001	0.854269	9.73855	Up	0.105742	0.17745
MLOC_34382.5	Uncharacterized protein	1245264 os04g0117200	1074	0	9	0.001	0.848303	9.72844	Up	0.00559068	0.0135778
MLOC_10001.2	Uncharacterized protein	extracellular ribonuclease	1077	0	9	0.001	0.84594	9.72441	Up	0.00559068	0.013599
MLOC_31431.1	Uncharacterized protein	retrotransposon line subclass	240	0	2	0.001	0.84359	9.7204	Up	0.342736	0.459056
MLOC_59534.1	Uncharacterized protein	ccr4-not transcription complex subunit 1-like	240	0	2	0.001	0.84359	9.7204	Up	0.342736	0.454263
MLOC_8654.1	Uncharacterized protein (Fragment)	ribonuclease h protein at1g65750-like	240	0	2	0.001	0.84359	9.7204	Up	0.342736	0.453987
AK371967	Hordeum vulgare subsp. vulgare mRNA for predicted protein, complete cds, clone: NIASHv2144D01	1160465 at1g30300	963	0	8	0.001	0.840962	9.7159	Up	0.0100652	0.0229586
MLOC_18488.1	Uncharacterized protein	hypothetical protein	843	0	7	0.001	0.840588	9.71526	Up	0.0181208	0.0387092
MLOC_29762.1	Uncharacterized protein	zinc finger ccch domain-containing protein 43-like	486	0	4	0.001	0.833176	9.70248	Up	0.105742	0.1776
MLOC_57238.1	Uncharacterized protein	saur family protein	489	0	4	0.001	0.828064	9.6936	Up	0.105742	0.178479
MLOC_53950.2	Uncharacterized protein	glucomannan 4-beta-mannosyltransferase 9-like	1350	0	11	0.001	0.824844	9.68798	Up	0.00172485	0.00465215
MLOC_3468.1	Uncharacterized protein	1636584 os10g0192300	246	0	2	0.001	0.823015	9.68478	Up	0.342736	0.455757
MLOC_8628.1	Uncharacterized protein (Fragment)	ribonuclease h protein at1g65750-like	246	0	2	0.001	0.823015	9.68478	Up	0.342736	0.449461
AK355981	Hordeum vulgare subsp. vulgare mRNA for predicted protein, complete cds, clone: NIASHv1028I09	synaptic vesicle 2-related	1482	0	12	0.001	0.819683	9.67892	Up	0.000958064	0.00271586
MLOC_77321.3	Uncharacterized protein	af466646_7 polyprotein	744	0	6	0.001	0.816378	9.67309	Up	0.0326238	0.0653014
AK356606	Hordeum vulgare subsp. vulgare mRNA for predicted protein, complete cds, clone: NIASHv1036M24	13908 protein	1986	0	16	0.001	0.815556	9.67164	Up	9.12e-05	0.000306451
AK356303	Hordeum vulgare subsp. vulgare mRNA for predicted protein, complete cds, clone: NIASHv1032N20	predicted protein	249	0	2	0.001	0.813099	9.66729	Up	0.342736	0.451768
AK372620	Hordeum vulgare subsp. vulgare mRNA for predicted protein, complete cds, clone: NIASHv3007D20	pectin acetylesterase	1248	0	10	0.001	0.811145	9.66382	Up	0.00310532	0.00797832
AK368562	Hordeum vulgare subsp. vulgare mRNA for predicted protein, complete cds, clone: NIASHv2076A16	2835952 auxin-regulated protein	1002	0	8	0.001	0.80823	9.65862	Up	0.0100652	0.0229682
MLOC_66479.1	Predicted protein (Uncharacterized protein)	protease inhibitor seed storage ltp family protein precursor	627	0	5	0.001	0.807264	9.6569	Up	0.0587342	0.108056
MLOC_531.1	Uncharacterized protein	1637229 os11g0573700	252	0	2	0.001	0.803419	9.65001	Up	0.342736	0.459112
MLOC_24134.1	Uncharacterized protein	retrotransposon ty1-copia subclass	381	0	3	0.001	0.797093	9.6386	Up	0.190372	0.285761
MLOC_58931.1	Predicted protein (Uncharacterized protein)	2897420 protein	762	0	6	0.001	0.797093	9.6386	Up	0.0326238	0.0652058
MLOC_7.2	Uncharacterized protein	heat shock transcription factor	255	0	2	0.001	0.793967	9.63294	Up	0.342736	0.455535
MLOC_3246.1	Uncharacterized protein	1675691 transposon en spm sub- expressed	255	0	2	0.001	0.793967	9.63294	Up	0.342736	0.452423
MLOC_55908.1	Uncharacterized protein	pectinesterase inhibitor domain containing protein	633	1	989	0.199816	158.163	9.62853	Up	1.39e-250	1.43e-248
MLOC_35344.1	Uncharacterized protein	cytochrome expressed	1536	0	12	0.001	0.790866	9.62729	Up	0.000958064	0.00271622
MLOC_57223.1	Uncharacterized protein	1632399 os01g0137100	897	0	7	0.001	0.789984	9.62568	Up	0.0181208	0.0388003
MLOC_80403.1	Uncharacterized protein	retrotransposon unclassified	513	0	4	0.001	0.789324	9.62447	Up	0.105742	0.179004
MLOC_33948.1	Uncharacterized protein (Fragment)	reverse transcriptase	258	0	2	0.001	0.784735	9.61606	Up	0.342736	0.457093
MLOC_60159.1	Uncharacterized protein	2837185 os08g0553400	258	0	2	0.001	0.784735	9.61606	Up	0.342736	0.454815
MLOC_34612.1	Uncharacterized protein	retrotransposon line subclass	258	0	2	0.001	0.784735	9.61606	Up	0.342736	0.452533
MLOC_74310.1	Uncharacterized protein	1633845 os04g0220500	906	0	7	0.001	0.782137	9.61128	Up	0.0181208	0.0388156
MLOC_4904.1	Uncharacterized protein	pentatricopeptide repeat-containing protein	1557	0	12	0.001	0.780199	9.6077	Up	0.000958064	0.00271692
MLOC_37810.1	Uncharacterized protein	predicted protein	390	0	3	0.001	0.778699	9.60492	Up	0.190372	0.284587
MLOC_60708.1	Uncharacterized protein	predicted protein	651	0	5	0.001	0.777503	9.6027	Up	0.0587342	0.108239
MLOC_75511.1	Flavin-containing monooxygenase (EC 1.-.-.-)	flavin-containing monooxygenase yucca10-like	261	0	2	0.001	0.775715	9.59938	Up	0.342736	0.457316
MLOC_27919.1	Uncharacterized protein	retrotransposon line subclass	264	0	2	0.001	0.7669	9.5829	Up	0.342736	0.456702
MLOC_79732.1	Uncharacterized protein (Fragment)	retrotransposon line subclass	264	0	2	0.001	0.7669	9.5829	Up	0.342736	0.456675
MLOC_78003.1	Uncharacterized protein (Fragment)	1631952 os02g0463700	132	0	1	0.001	0.7669	9.5829	Up	0.617044	0.703628
MLOC_81372.1	Uncharacterized protein (Fragment)	af466646_7 polyprotein	132	0	1	0.001	0.7669	9.5829	Up	0.617044	0.701832
AK251401.1	-	protein wax2-like	1857	0	14	0.001	0.763184	9.57589	Up	0.000295584	0.000912666
AK357160	Hordeum vulgare subsp. vulgare mRNA for predicted protein, partial cds, clone: NIASHv1047E12	duf827 domain containing family protein	2127	0	16	0.001	0.761492	9.57269	Up	9.12e-05	0.000306546
AK373724	Hordeum vulgare subsp. vulgare mRNA for predicted protein, complete cds, clone: NIASHv3041K18	---NA---	267	0	2	0.001	0.758284	9.56659	Up	0.342736	0.45352
AK373297	Hordeum vulgare subsp. vulgare mRNA for predicted protein, complete cds, clone: NIASHv3026F15	tpa: protein kinase superfamily protein	2286	0	17	0.001	0.75281	9.55614	Up	5.07e-05	0.00017737
MLOC_44297.1	Uncharacterized protein	1636340 os09g0421600	2424	0	18	0.001	0.751714	9.55404	Up	2.81e-05	0.000102173
MLOC_33927.1	Uncharacterized protein	retrotransposon line subclass	540	0	4	0.001	0.749858	9.55047	Up	0.105742	0.179046
MLOC_64172.1	Uncharacterized protein (Fragment)	retrotransposon unclassified	405	0	3	0.001	0.749858	9.55047	Up	0.190372	0.285486
MLOC_48367.1	Uncharacterized protein (Fragment)	dna-directed rna polymerase d subunit 2a-like	135	0	1	0.001	0.749858	9.55047	Up	0.617044	0.707991
MLOC_53379.7	Uncharacterized protein	pentatricopeptide repeat-containing protein at3g62890-like	1356	0	10	0.001	0.74654	9.54408	Up	0.00310532	0.00797457
MLOC_44143.1	Uncharacterized protein	xylanase inhibitor taxi-iv	1359	0	10	0.001	0.744892	9.54089	Up	0.00310532	0.00796614
AK369678	Hordeum vulgare subsp. vulgare mRNA for predicted protein, complete cds, clone: NIASHv2095I14	244112 ring fyve phd zinc finger-containing protein	816	0	6	0.001	0.744345	9.53983	Up	0.0326238	0.0655659
MLOC_41191.1	Uncharacterized protein	plastidic glucose transporter 3	273	0	2	0.001	0.741618	9.53453	Up	0.342736	0.456285
MLOC_48423.1	Uncharacterized protein	cysteine-rich receptor-like protein kinase 23-like	273	0	2	0.001	0.741618	9.53453	Up	0.342736	0.454153
MLOC_74398.1	Uncharacterized protein	2246677 nonspecific lipid-transfer protein precursor	273	0	2	0.001	0.741618	9.53453	Up	0.342736	0.45185
MLOC_39496.1	Uncharacterized protein	af237570_1receptor-like protein kinase	273	0	2	0.001	0.741618	9.53453	Up	0.342736	0.449192
MLOC_39533.1	Uncharacterized protein	l-type lectin-domain containing receptor kinase -like	2058	0	15	0.001	0.737834	9.52715	Up	0.000164182	0.000530964
MLOC_512.1	Uncharacterized protein	reverse transcriptase	276	0	2	0.001	0.733557	9.51877	Up	0.342736	0.458943
MLOC_31964.1	Uncharacterized protein (Fragment)	reverse transcriptase	276	0	2	0.001	0.733557	9.51877	Up	0.342736	0.457037
MLOC_54020.1	Uncharacterized protein (Fragment)	reverse transcriptase	138	0	1	0.001	0.733557	9.51877	Up	0.617044	0.709333
MLOC_77644.1	Uncharacterized protein	49461 os06g0710900	138	0	1	0.001	0.733557	9.51877	Up	0.617044	0.706469
MLOC_38450.1	Uncharacterized protein	auxin induced protein	414	0	3	0.001	0.733557	9.51877	Up	0.190372	0.284179
MLOC_2328.1	Uncharacterized protein	retrotransposon unclassified	558	0	4	0.001	0.725669	9.50317	Up	0.105742	0.178631
MLOC_4401.1	Uncharacterized protein	1634018 os04g0431700	3084	0	22	0.001	0.72214	9.49613	Up	2.68e-06	1.11e-05
MLOC_23430.1	Uncharacterized protein	protein	564	0	4	0.001	0.717949	9.48774	Up	0.105742	0.178727
MLOC_80213.1	Uncharacterized protein (Fragment)	retrotransposon unclassified	141	0	1	0.001	0.717949	9.48774	Up	0.617044	0.709519
MLOC_72863.1	Uncharacterized protein (Fragment)		141	0	1	0.001	0.717949	9.48774	Up	0.617044	0.705507
MLOC_788.1	Uncharacterized protein (Fragment)	retrotransposon line subclass	141	0	1	0.001	0.717949	9.48774	Up	0.617044	0.702454
MLOC_34280.1	Uncharacterized protein	retrotransposon unclassified	282	0	2	0.001	0.717949	9.48774	Up	0.342736	0.449542
MLOC_62114.2	Uncharacterized protein	ac084748_4 calmodulin-binding protein	1845	0	13	0.001	0.71328	9.47832	Up	0.000532154	0.00157946
MLOC_40507.1	Uncharacterized protein (Fragment)	f-box fbd lrr-repeat protein at4g03220-like	285	0	2	0.001	0.710392	9.47247	Up	0.342736	0.452095
MLOC_37608.1	Uncharacterized protein	2752693 glutaredoxin-like protein	429	0	3	0.001	0.707908	9.46742	Up	0.190372	0.284004
MLOC_5316.1	Uncharacterized protein	2246460 remorin	573	0	4	0.001	0.706673	9.4649	Up	0.105742	0.17775
MLOC_58689.1	Uncharacterized protein	tubulin alpha-6 chain	288	0	2	0.001	0.702992	9.45736	Up	0.342736	0.458156
AK376621	Hordeum vulgare subsp. vulgare mRNA for predicted protein, complete cds, clone: NIASHv3129E04	type 2 non specific lipid transfer protein precursor	288	0	2	0.001	0.702992	9.45736	Up	0.342736	0.453026
MLOC_48287.1	Uncharacterized protein	retrotransposon unclassified	576	0	4	0.001	0.702992	9.45736	Up	0.105742	0.178038
AK357680	Hordeum vulgare subsp. vulgare mRNA for predicted protein, partial cds, clone: NIASHv1059E13	retrotransposon unclassified	435	0	3	0.001	0.698144	9.44738	Up	0.190372	0.28414
AK376021	Hordeum vulgare subsp. vulgare mRNA for predicted protein, complete cds, clone: NIASHv3112J07	973250 myb-related protein	291	0	2	0.001	0.695745	9.44241	Up	0.342736	0.454677
MLOC_47665.1	Uncharacterized protein	1632802 os01g0676900	582	0	4	0.001	0.695745	9.44241	Up	0.105742	0.177956
MLOC_71450.3	Uncharacterized protein	246319 protein phosphatase 2c 68	1170	0	8	0.001	0.692177	9.435	Up	0.0100652	0.0229778
AK375666	Hordeum vulgare subsp. vulgare mRNA for predicted protein, complete cds, clone: NIASHv3100M11	pectinesterase inhibitor domain containing protein precursor	591	0	4	0.001	0.68515	9.42028	Up	0.105742	0.178852
MLOC_47872.1	Uncharacterized protein		297	0	2	0.001	0.681689	9.41297	Up	0.342736	0.456368
MLOC_53628.1	Uncharacterized protein	sant myb protein	297	0	2	0.001	0.681689	9.41297	Up	0.342736	0.455119
MLOC_80421.1	Uncharacterized protein	retrotransposon unclassified	297	0	2	0.001	0.681689	9.41297	Up	0.342736	0.451495
AK368545	Hordeum vulgare subsp. vulgare mRNA for predicted protein, complete cds, clone: NIASHv2075M07	holliday junction resolvase-like	597	0	4	0.001	0.678264	9.4057	Up	0.105742	0.177696
AK372589	Hordeum vulgare subsp. vulgare mRNA for predicted protein, partial cds, clone: NIASHv3005M06	tpa: lstk-1-like -related protein kinase family protein	1497	0	10	0.001	0.676225	9.40136	Up	0.00310532	0.00796895
MLOC_33634.1	Uncharacterized protein (Fragment)	reverse transcriptase	300	0	2	0.001	0.674872	9.39847	Up	0.342736	0.459027
MLOC_35603.1	Uncharacterized protein	reverse transcriptase	300	0	2	0.001	0.674872	9.39847	Up	0.342736	0.458044
MLOC_30476.1	Uncharacterized protein	reverse transcriptase	450	0	3	0.001	0.674872	9.39847	Up	0.190372	0.284724
MLOC_27364.1	Uncharacterized protein	1634649 os05g0475600	303	0	2	0.001	0.66819	9.38412	Up	0.342736	0.459619
MLOC_69184.1	Uncharacterized protein (Fragment)	reverse transcriptase	303	0	2	0.001	0.66819	9.38412	Up	0.342736	0.456647
AK367693	Hordeum vulgare subsp. vulgare mRNA for predicted protein, complete cds, clone: NIASHv2060I17	2608304 protein	456	0	3	0.001	0.665992	9.37936	Up	0.190372	0.28529
AK374927	Hordeum vulgare subsp. vulgare mRNA for predicted protein, complete cds, clone: NIASHv3080I14	ribosomal protein l2	762	0	5	0.001	0.664244	9.37557	Up	0.0587342	0.108175
MLOC_65713.1	Uncharacterized protein	1851965 os12g0106100	765	0	5	0.001	0.66164	9.3699	Up	0.0587342	0.108266
MLOC_1250.1	Uncharacterized protein	gem-like protein 4-like	612	0	4	0.001	0.66164	9.3699	Up	0.105742	0.178148
MLOC_2071.1	Uncharacterized protein	retrotransposon ty1-copia subclass	306	0	2	0.001	0.66164	9.3699	Up	0.342736	0.453053
AK251179.1	-	jasmonate induced protein	1071	0	7	0.001	0.66164	9.3699	Up	0.0181208	0.0387168
AK376529	Hordeum vulgare subsp. vulgare mRNA for predicted protein, complete cds, clone: NIASHv3126N04	1665422 domain containing expressed	2454	0	16	0.001	0.660022	9.36637	Up	9.12e-05	0.000306593
AK373680	Hordeum vulgare subsp. vulgare mRNA for predicted protein, partial cds, clone: NIASHv3039L10	endo- -beta-glucanase	1233	0	8	0.001	0.65681	9.35933	Up	0.0100652	0.022973
AK353886	Hordeum vulgare subsp. vulgare mRNA for predicted protein, partial cds, clone: NIASHv1003H14	2881796 os02g0489500	933	0	6	0.001	0.651002	9.34652	Up	0.0326238	0.0652596
MLOC_69385.1	Uncharacterized protein	422829 embryo-specific protein	936	0	6	0.001	0.648916	9.34189	Up	0.0326238	0.0655237
MLOC_30080.1	Uncharacterized protein	retrotransposon unclassified	312	0	2	0.001	0.648916	9.34189	Up	0.342736	0.453163
MLOC_40443.1	Uncharacterized protein	retrotransposon unclassified	312	0	2	0.001	0.648916	9.34189	Up	0.342736	0.450219
MLOC_57519.1	Uncharacterized protein	2553162 alpha-expansin 23	780	0	5	0.001	0.648916	9.34189	Up	0.0587342	0.108047
MLOC_72511.2	Predicted protein (Uncharacterized protein)	1137547 chain structure of oryza sativa complex with octanoic acid	471	0	3	0.001	0.644783	9.33267	Up	0.190372	0.285212
AK356380	Hordeum vulgare subsp. vulgare mRNA for predicted protein, complete cds, clone: NIASHv1033P09	reticuline oxidase-like	1728	0	11	0.001	0.644409	9.33183	Up	0.00172485	0.00465157
AK367855	Hordeum vulgare subsp. vulgare mRNA for predicted protein, partial cds, clone: NIASHv2063J01	phytochromobilin:ferredoxin chloroplastic-like	315	0	2	0.001	0.642736	9.32808	Up	0.342736	0.459732
MLOC_36363.1	Peroxidase (EC 1.11.1.7)	class iii peroxidase	945	0	6	0.001	0.642736	9.32808	Up	0.0326238	0.0655478
AK357337	Hordeum vulgare subsp. vulgare mRNA for predicted protein, complete cds, clone: NIASHv1051C16	900937 dihydropyrimidine amidohydrolase	1578	0	10	0.001	0.641514	9.32534	Up	0.00310532	0.0079802
MLOC_17650.1	Uncharacterized protein	ring-h2 finger protein atl70-like	159	0	1	0.001	0.636672	9.31441	Up	0.617044	0.711994
MLOC_75091.1	Uncharacterized protein	retrotransposon unclassified	318	0	2	0.001	0.636672	9.31441	Up	0.342736	0.455868
MLOC_34954.1	Uncharacterized protein	nbs-lrr disease resistance protein homologue	1755	0	11	0.001	0.634495	9.30947	Up	0.00172485	0.00465502
MLOC_58328.1	Uncharacterized protein	2889793 protein	798	0	5	0.001	0.634279	9.30897	Up	0.0587342	0.108495
AK361215	Hordeum vulgare subsp. vulgare mRNA for predicted protein, complete cds, clone: NIASHv1135D07	wall-associated receptor kinase 2-like	2238	0	14	0.001	0.633258	9.30665	Up	0.000295584	0.000912924
MLOC_7554.5	DNA-directed RNA polymerase (EC 2.7.7.6)	dna-directed rna polymerase ii subunit rpb1-like	1446	0	9	0.001	0.630068	9.29936	Up	0.00559068	0.0135839
MLOC_49116.2	Predicted protein (Uncharacterized protein)	dna methyltransferase 1-associated protein	807	0	5	0.001	0.627205	9.29279	Up	0.0587342	0.108504
AK370232	Hordeum vulgare subsp. vulgare mRNA for predicted protein, complete cds, clone: NIASHv2107F12	2163746 nbs-lrr class disease resistance protein	2586	0	16	0.001	0.626332	9.29078	Up	9.12e-05	0.000306357
MLOC_63564.2	Uncharacterized protein	1304981 os05g0547600	486	0	3	0.001	0.624882	9.28744	Up	0.190372	0.285918
MLOC_73056.1	Uncharacterized protein (Fragment)	retrotransposon unclassified	162	0	1	0.001	0.624882	9.28744	Up	0.617044	0.71068
MLOC_55767.2	Uncharacterized protein	mads box	1296	0	8	0.001	0.624882	9.28744	Up	0.0100652	0.0229562
MLOC_3037.1	Uncharacterized protein	disease resistance protein rga4-like	975	0	6	0.001	0.622959	9.28299	Up	0.0326238	0.0653134
AK249918.1	-	2607365 protein	990	0	6	0.001	0.61352	9.26097	Up	0.0326238	0.06517
AK355279	Hordeum vulgare subsp. vulgare mRNA for predicted protein, complete cds, clone: NIASHv1018H11	107556 tpa: dna dependent rna polymerase d largest subunit family protein	660	0	4	0.001	0.61352	9.26097	Up	0.105742	0.177477
AK354929	Hordeum vulgare subsp. vulgare mRNA for predicted protein, complete cds, clone: NIASHv1013I10	serine threonine-protein kinase chloroplastic-like	1332	0	8	0.001	0.607993	9.24791	Up	0.0100652	0.022985
MLOC_33736.1	Uncharacterized protein	reverse transcriptase	333	0	2	0.001	0.607993	9.24791	Up	0.342736	0.456842
MLOC_3892.1	Uncharacterized protein	reverse transcriptase	501	0	3	0.001	0.606173	9.24359	Up	0.190372	0.285095
MLOC_74908.2	Uncharacterized protein	probable lrr receptor-like serine threonine-protein kinase at1g53430-like	1170	0	7	0.001	0.605655	9.24235	Up	0.0181208	0.038827
MLOC_74319.1	Uncharacterized protein	retrotransposon unclassified	669	0	4	0.001	0.605267	9.24143	Up	0.105742	0.177436
AK369945	Hordeum vulgare subsp. vulgare mRNA for predicted protein, complete cds, clone: NIASHv2101L04	nas3_horvu ame: full=probable nicotianamine synthase 3 ame: full= 3 ame: full=s-adenosyl-l-methionine:s-adenosyl-l-methionine:s-adenosyl-methionine 3-amino-3-carboxypropyltransferase 3	1008	0	6	0.001	0.602565	9.23497	Up	0.0326238	0.0655418
MLOC_68168.1	Uncharacterized protein	2898581 protein	1008	0	6	0.001	0.602565	9.23497	Up	0.0326238	0.0654574
MLOC_81890.1	Uncharacterized protein (Fragment)	ribosomal protein	168	0	1	0.001	0.602565	9.23497	Up	0.617044	0.710417
MLOC_69407.1	Uncharacterized protein (Fragment)	ribonuclease h protein at1g65750-like	168	0	1	0.001	0.602565	9.23497	Up	0.617044	0.709931
MLOC_32711.1	Uncharacterized protein (Fragment)	af466646_7 polyprotein	168	0	1	0.001	0.602565	9.23497	Up	0.617044	0.707025
AK373192	Hordeum vulgare subsp. vulgare mRNA for predicted protein, complete cds, clone: NIASHv3023G03	61442 os06g0134300	678	0	4	0.001	0.597232	9.22215	Up	0.105742	0.177641
MLOC_6685.1	Uncharacterized protein	14351 ferredoxin-like	678	0	4	0.001	0.597232	9.22215	Up	0.105742	0.177491
MLOC_64392.1	Uncharacterized protein	polygalacturonase inhibitor-like	1020	0	6	0.001	0.595476	9.2179	Up	0.0326238	0.0654815
MLOC_56673.1	Uncharacterized protein	epidermal patterning factor-like protein 2-like	681	0	4	0.001	0.594601	9.21578	Up	0.105742	0.177997
MLOC_4638.1	Uncharacterized protein	1909347 cs 5	342	0	2	0.001	0.591993	9.20944	Up	0.342736	0.457932
AK363724	Hordeum vulgare subsp. vulgare mRNA for predicted protein, complete cds, clone: NIASHv2018G10	protein	1710	0	10	0.001	0.591993	9.20944	Up	0.00310532	0.00797363
MLOC_55858.1	Uncharacterized protein	ribonuclease h protein at1g65750-like	342	0	2	0.001	0.591993	9.20944	Up	0.342736	0.451033
MLOC_78698.1	Uncharacterized protein (Fragment)	af466646_7 polyprotein	171	0	1	0.001	0.591993	9.20944	Up	0.617044	0.703702
MLOC_30768.1	Uncharacterized protein	1224971 retrotransposon line subclass	513	0	3	0.001	0.591993	9.20944	Up	0.190372	0.28381
MLOC_59591.1	Uncharacterized protein	no apical meristem protein	687	0	4	0.001	0.589408	9.20312	Up	0.105742	0.17852
MLOC_27199.1	Uncharacterized protein	hypothetical protein SORBIDRAFT_01g029380	345	0	2	0.001	0.586846	9.19684	Up	0.342736	0.459676
AK354354	Hordeum vulgare subsp. vulgare mRNA for predicted protein, complete cds, clone: NIASHv1006L24	dnaj homolog subfamily c member 3 homolog	1383	0	8	0.001	0.585573	9.1937	Up	0.0100652	0.0229227
MLOC_67394.1	Uncharacterized protein	pentatricopeptide repeat-containing protein at5g61800- partial	1389	0	8	0.001	0.583043	9.18746	Up	0.0100652	0.0229108
MLOC_21425.1	Uncharacterized protein (Fragment)	728563 os12g0609600	174	0	1	0.001	0.581787	9.18435	Up	0.617044	0.710305
MLOC_29759.1	Uncharacterized protein	retrotransposon unclassified	348	0	2	0.001	0.581787	9.18435	Up	0.342736	0.455896
AK372376	Hordeum vulgare subsp. vulgare mRNA for predicted protein, complete cds, clone: NIASHv2150O24	6354 protein	1218	0	7	0.001	0.581787	9.18435	Up	0.0181208	0.0387433
MLOC_8925.1	Uncharacterized protein (Fragment)		174	0	1	0.001	0.581787	9.18435	Up	0.617044	0.705175
AK374816	Hordeum vulgare subsp. vulgare mRNA for predicted protein, partial cds, clone: NIASHv3077C18	peroxidase 65	1044	0	6	0.001	0.581787	9.18435	Up	0.0326238	0.0651581
MLOC_25731.1	Uncharacterized protein	gdsl esterase lipase at4g10955-like	1047	0	6	0.001	0.58012	9.18021	Up	0.0326238	0.0654454
MLOC_1230.1	Uncharacterized protein	probable beta-d-xylosidase 5-like	2445	0	14	0.001	0.579645	9.17903	Up	0.000295584	0.000912021
MLOC_11336.1	Uncharacterized protein	retrotransposon unclassified	525	0	3	0.001	0.578462	9.17608	Up	0.190372	0.285056
MLOC_4360.1	Uncharacterized protein	pentatricopeptide repeat-containing protein	876	0	5	0.001	0.577802	9.17443	Up	0.0587342	0.108129
MLOC_29357.1	Uncharacterized protein	retrotransposon unclassified	351	0	2	0.001	0.576814	9.17196	Up	0.342736	0.458634
MLOC_14384.1	Uncharacterized protein	retrotransposon unclassified	351	0	2	0.001	0.576814	9.17196	Up	0.342736	0.452396
MLOC_62970.1	Uncharacterized protein	f-box protein at5g18160-like	1230	0	7	0.001	0.576111	9.1702	Up	0.0181208	0.0388117
MLOC_44247.1	Predicted protein (Uncharacterized protein)	monoglyceride lipase-like	1056	0	6	0.001	0.575175	9.16786	Up	0.0326238	0.0653254
MLOC_59357.1	Uncharacterized protein	invertase inhibitor	528	0	3	0.001	0.575175	9.16786	Up	0.190372	0.284451
AK363683	Hordeum vulgare subsp. vulgare mRNA for predicted protein, complete cds, clone: NIASHv2018B04	251204 at1g78110	1056	0	6	0.001	0.575175	9.16786	Up	0.0326238	0.0652476
MLOC_61076.1	Predicted protein (Uncharacterized protein)	364332 endosomal targeting bro1-like domain-containing protein	1236	0	7	0.001	0.573314	9.16318	Up	0.0181208	0.0387737
MLOC_79797.1	Uncharacterized protein (Fragment)	retrotransposon line subclass	177	0	1	0.001	0.571926	9.15968	Up	0.617044	0.712107
MLOC_75182.1	Uncharacterized protein	ap2 erf domain-containing transcription factor	531	0	3	0.001	0.571926	9.15968	Up	0.190372	0.285271
MLOC_33467.1	Uncharacterized protein (Fragment)	af466646_7 polyprotein	177	0	1	0.001	0.571926	9.15968	Up	0.617044	0.71023
MLOC_60505.1	Uncharacterized protein	indole-3-acetic acid-amido synthetase	1770	0	10	0.001	0.571926	9.15968	Up	0.00310532	0.00797551
MLOC_63274.1	Uncharacterized protein	myb dna-binding domain superfamily protein	711	0	4	0.001	0.569513	9.15358	Up	0.105742	0.17797
MLOC_56263.1	Uncharacterized protein	inositol hexakisphosphate and diphosphoinositol-pentakisphosphate kinase 1-like	1071	0	6	0.001	0.56712	9.14751	Up	0.0326238	0.0651223
AK371913	Hordeum vulgare subsp. vulgare mRNA for predicted protein, complete cds, clone: NIASHv2143D23	276743 phosphoesterase	1434	0	8	0.001	0.564747	9.14146	Up	0.0100652	0.0229418
AK376471	Hordeum vulgare subsp. vulgare mRNA for predicted protein, complete cds, clone: NIASHv3125C09	599102 -1	897	0	5	0.001	0.564275	9.14025	Up	0.0587342	0.108084
MLOC_50852.1	Uncharacterized protein	724757 os11g0514800	1257	0	7	0.001	0.563736	9.13888	Up	0.0181208	0.0387282
MLOC_41703.1	Uncharacterized protein	retrotransposon unclassified	360	0	2	0.001	0.562394	9.13544	Up	0.342736	0.459366
AK373121	Hordeum vulgare subsp. vulgare mRNA for predicted protein, complete cds, clone: NIASHv3021L02	49447 zinc finger	360	0	2	0.001	0.562394	9.13544	Up	0.342736	0.457484
MLOC_32859.1	Uncharacterized protein	retrotransposon unclassified	360	0	2	0.001	0.562394	9.13544	Up	0.342736	0.455064
MLOC_65988.1	Uncharacterized protein	tpr repeat	540	0	3	0.001	0.562394	9.13544	Up	0.190372	0.284101
MLOC_47.1	Uncharacterized protein	math domain containing protein	363	0	2	0.001	0.557746	9.12346	Up	0.342736	0.455923
AK364623	Hordeum vulgare subsp. vulgare mRNA for predicted protein, complete cds, clone: NIASHv2027A11	receptor serine threonine kinase pr5k	1452	0	8	0.001	0.557746	9.12346	Up	0.0100652	0.0229442
MLOC_36993.2	Uncharacterized protein	hydroxyproline-rich glycoprotein family protein	726	0	4	0.001	0.557746	9.12346	Up	0.105742	0.178093
MLOC_13597.2	Uncharacterized protein	disease resistance protein at3g14460-like	1452	0	8	0.001	0.557746	9.12346	Up	0.0100652	0.0229203
MLOC_8488.1	Uncharacterized protein (Fragment)	retrotransposon unclassified	183	0	1	0.001	0.553174	9.11159	Up	0.617044	0.704216
AK367792	Hordeum vulgare subsp. vulgare mRNA for predicted protein, complete cds, clone: NIASHv2062D22	nudix hydrolase 23	549	0	3	0.001	0.553174	9.11159	Up	0.190372	0.283926
MLOC_38530.1	Uncharacterized protein	cytokinin-o-glucosyltransferase 3	1464	0	8	0.001	0.553174	9.11159	Up	0.0100652	0.022906
MLOC_23109.1	Uncharacterized protein (Fragment)	retrotransposon unclassified	369	0	2	0.001	0.548677	9.09981	Up	0.342736	0.454953
AK358757	Hordeum vulgare subsp. vulgare mRNA for predicted protein, complete cds, clone: NIASHv1082K08	1338127 os05g0193100	738	0	4	0.001	0.548677	9.09981	Up	0.105742	0.177778
MLOC_28582.1	Uncharacterized protein (Fragment)	polyadenylate-binding protein 2	186	0	1	0.001	0.544252	9.08813	Up	0.617044	0.713842
MLOC_78273.1	Uncharacterized protein (Fragment)	retrotransposon line subclass	186	0	1	0.001	0.544252	9.08813	Up	0.617044	0.713464
MLOC_23748.1	Uncharacterized protein (Fragment)	cysteine-rich receptor-like protein kinase 23-like	186	0	1	0.001	0.544252	9.08813	Up	0.617044	0.71098
MLOC_27949.1	Uncharacterized protein (Fragment)		186	0	1	0.001	0.544252	9.08813	Up	0.617044	0.706432
MLOC_40495.1	Uncharacterized protein	cytochrome p450 superfamily protein	1116	0	6	0.001	0.544252	9.08813	Up	0.0326238	0.0652357
MLOC_61542.1	Uncharacterized protein	transposon mutator sub-class	186	0	1	0.001	0.544252	9.08813	Up	0.617044	0.703371
MLOC_35169.1	Uncharacterized protein	2615023 protein	1491	0	8	0.001	0.543157	9.08523	Up	0.0100652	0.0229036
AK369515	Hordeum vulgare subsp. vulgare mRNA for predicted protein, complete cds, clone: NIASHv2092L06	disease resistance rpp13-like protein 3-like	4113	0	22	0.001	0.541473	9.08075	Up	2.68e-06	1.11e-05
MLOC_72790.1	Uncharacterized protein	predicted protein	561	0	3	0.001	0.541341	9.0804	Up	0.190372	0.285879
MLOC_4926.1	Hexokinase (EC 2.7.1.1)	2258665 hexokinase-1	1500	0	8	0.001	0.539898	9.07654	Up	0.0100652	0.0229131
MLOC_14606.2	Plastidial ADP-glucose transporter (Uncharacterized protein)	adp-glucose brittle-1 transporter precursor	1275	6	4040	0.595216	320.763	9.07388	Up	0	0
MLOC_9059.1	Uncharacterized protein (Fragment)	ribonuclease h protein at1g65750-like	189	0	1	0.001	0.535613	9.06505	Up	0.617044	0.712483
MLOC_6762.1	Uncharacterized protein (Fragment)	af466646_7 polyprotein	189	0	1	0.001	0.535613	9.06505	Up	0.617044	0.702381
MLOC_51301.4	Uncharacterized protein	f-box protein pp2-b1	948	0	5	0.001	0.533918	9.06047	Up	0.0587342	0.108294
MLOC_16127.1	Uncharacterized protein (Fragment)	1665983 os03g0175800	570	0	3	0.001	0.532794	9.05743	Up	0.190372	0.283733
MLOC_16325.1	Uncharacterized protein	transmembrane bax inhibitor motif-containing protein 4	762	0	4	0.001	0.531396	9.05364	Up	0.105742	0.17841
AK371479	Hordeum vulgare subsp. vulgare mRNA for predicted protein, partial cds, clone: NIASHv2135B24	leucine rich repeat family protein	762	0	4	0.001	0.531396	9.05364	Up	0.105742	0.177627
MLOC_61742.1	Uncharacterized protein	uncharacterized mscs family protein at1g78610-like	2673	0	14	0.001	0.530203	9.0504	Up	0.000295584	0.000913182
MLOC_11154.1	Uncharacterized protein	exocyst complex component sec3a-like	1719	0	9	0.001	0.530004	9.04986	Up	0.00559068	0.0135854
MLOC_62307.3	Uncharacterized protein	1850160 os06g0165300	1533	0	8	0.001	0.528276	9.04515	Up	0.0100652	0.0229371
MLOC_41814.1	Uncharacterized protein (Fragment)	34666 kinesin heavy chain	192	0	1	0.001	0.527244	9.04233	Up	0.617044	0.710904
MLOC_80501.1	Uncharacterized protein	e3 sumo-protein ligase siz2-like	192	0	1	0.001	0.527244	9.04233	Up	0.617044	0.709893
MLOC_64499.1	Predicted protein (Uncharacterized protein)	2561180 os04g0639000	192	0	1	0.001	0.527244	9.04233	Up	0.617044	0.709221
MLOC_46009.1	Uncharacterized protein		384	0	2	0.001	0.527244	9.04233	Up	0.342736	0.455369
MLOC_72570.1	Uncharacterized protein	upf0481 protein at3g47200-like	1923	0	10	0.001	0.526422	9.04007	Up	0.00310532	0.00798866
MLOC_17120.1	Uncharacterized protein	pentatricopeptide repeat-containing protein mitochondrial-like	1929	0	10	0.001	0.524784	9.03558	Up	0.00310532	0.00797645
AK353613	Hordeum vulgare subsp. vulgare mRNA for predicted protein, complete cds, clone: NIASHv1001H17	protein	1545	0	8	0.001	0.524173	9.0339	Up	0.0100652	0.0229802
MLOC_27396.1	Uncharacterized protein	reverse transcriptase	969	0	5	0.001	0.522347	9.02886	Up	0.0587342	0.10844
MLOC_71160.1	Uncharacterized protein	protein fez-like	777	0	4	0.001	0.521137	9.02552	Up	0.105742	0.178713
MLOC_33114.1	Uncharacterized protein (Fragment)	reverse transcriptase	195	0	1	0.001	0.519133	9.01996	Up	0.617044	0.712295
MLOC_78854.1	Uncharacterized protein	retrotransposon line subclass	195	0	1	0.001	0.519133	9.01996	Up	0.617044	0.708773
MLOC_9897.3	Uncharacterized protein	guanylate-binding protein 4-like	1179	0	6	0.001	0.51517	9.0089	Up	0.0326238	0.0652775
MLOC_18469.1	Predicted protein (Uncharacterized protein)	phospholipase a1-iigamma-like	1182	0	6	0.001	0.513862	9.00524	Up	0.0326238	0.0653194
MLOC_16968.1	Uncharacterized protein (Fragment)	wall-associated receptor kinase 2-like	1182	0	6	0.001	0.513862	9.00524	Up	0.0326238	0.0651998
AK375622	Hordeum vulgare subsp. vulgare mRNA for predicted protein, complete cds, clone: NIASHv3099J21	60811 snare-interacting protein keule	1971	0	10	0.001	0.513602	9.00451	Up	0.00310532	0.00798678
MLOC_70140.1	Predicted protein (Uncharacterized protein)	2612099 uclacyanin 3-like protein	594	0	3	0.001	0.511267	8.99793	Up	0.190372	0.285506
MLOC_31107.1	Uncharacterized protein (Fragment)	1311640 os05g0539900	198	0	1	0.001	0.511267	8.99793	Up	0.617044	0.709594
MLOC_58274.1	Uncharacterized protein	retrotransposon line subclass	198	0	1	0.001	0.511267	8.99793	Up	0.617044	0.707582
AK369330	Hordeum vulgare subsp. vulgare mRNA for predicted protein, complete cds, clone: NIASHv2089D05	370811 amp deaminase	2376	0	12	0.001	0.511267	8.99793	Up	0.000958064	0.00271551
MLOC_3298.1	Uncharacterized protein	ap2 erebp-like protein	594	0	3	0.001	0.511267	8.99793	Up	0.190372	0.283868
MLOC_53357.1	Uncharacterized protein	kinesin-related protein	2586	0	13	0.001	0.508894	8.99122	Up	0.000532154	0.00157775
MLOC_11147.1	Uncharacterized protein	2663196 os08g0162700	597	0	3	0.001	0.508698	8.99066	Up	0.190372	0.285075
MLOC_66001.1	Glutamate receptor	glutamate receptor -like	2799	0	14	0.001	0.506335	8.98395	Up	0.000295584	0.00091215
AK360116	Hordeum vulgare subsp. vulgare mRNA for predicted protein, complete cds, clone: NIASHv1110L03	cysteine-rich receptor-like protein kinase 10-like	1200	0	6	0.001	0.506154	8.98343	Up	0.0326238	0.0654034
MLOC_14016.1	Uncharacterized protein	indole-3-acetic acid-induced protein arg7-like	402	0	2	0.001	0.503636	8.97624	Up	0.342736	0.45993
MLOC_4835.1	Uncharacterized protein	thiosulfate chloroplastic-like	402	0	2	0.001	0.503636	8.97624	Up	0.342736	0.457708
MLOC_40742.1	Uncharacterized protein	ap2-containing protein	402	0	2	0.001	0.503636	8.97624	Up	0.342736	0.454291
MLOC_30472.1	Uncharacterized protein	retrotransposon line subclass	201	0	1	0.001	0.503636	8.97624	Up	0.617044	0.70658
MLOC_27431.1	Uncharacterized protein	reverse transcriptase	603	0	3	0.001	0.503636	8.97624	Up	0.190372	0.284354
MLOC_31782.1	Uncharacterized protein	predicted protein	603	0	3	0.001	0.503636	8.97624	Up	0.190372	0.283965
AK358075	Hordeum vulgare subsp. vulgare mRNA for predicted protein, complete cds, clone: NIASHv1068C06	fructose- - chloroplastic-like	1212	0	6	0.001	0.501143	8.96908	Up	0.0326238	0.0651402
MLOC_77941.1	Uncharacterized protein	uncharacterized rna-binding	405	0	2	0.001	0.499905	8.96551	Up	0.342736	0.451822
MLOC_17989.1	Uncharacterized protein	high-affinity potassium transporter	1014	0	5	0.001	0.499166	8.96338	Up	0.0587342	0.108458
MLOC_71764.1	Uncharacterized protein	predicted protein	609	0	3	0.001	0.498674	8.96195	Up	0.190372	0.284257
MLOC_71688.1	E3 ubiquitin-protein ligase (EC 6.3.2.-)	e3 ubiquitin-protein ligase sina-like 7-like	1017	0	5	0.001	0.497693	8.95911	Up	0.0587342	0.10812
MLOC_3231.1	Uncharacterized protein	---NA---	204	0	1	0.001	0.49623	8.95486	Up	0.617044	0.711919
MLOC_9165.1	Uncharacterized protein (Fragment)	ribonuclease h protein at1g65750-like	204	0	1	0.001	0.49623	8.95486	Up	0.617044	0.706802
AK354781	Hordeum vulgare subsp. vulgare mRNA for predicted protein, complete cds, clone: NIASHv1011B20	26205 os06g0645500	615	0	3	0.001	0.493809	8.94781	Up	0.190372	0.284412
MLOC_44384.1	Uncharacterized protein	ribonuclease h protein at1g65750-like	411	0	2	0.001	0.492608	8.94429	Up	0.342736	0.453767
AK358285	Hordeum vulgare subsp. vulgare mRNA for predicted protein, partial cds, clone: NIASHv1072L15	probable gmp synthase	1233	0	6	0.001	0.492608	8.94429	Up	0.0326238	0.0652177
MLOC_52355.1	Uncharacterized protein	zpt4-4 (zinc-finger protein)-like protein	825	0	4	0.001	0.490816	8.93904	Up	0.105742	0.178492
MLOC_32687.1	Uncharacterized protein	cysteine-rich receptor-like protein kinase 23-like	207	0	1	0.001	0.489038	8.9338	Up	0.617044	0.713502
MLOC_81995.1	Uncharacterized protein		414	0	2	0.001	0.489038	8.9338	Up	0.342736	0.456229
MLOC_46848.1	Uncharacterized protein	1636213 os09g0292400	207	0	1	0.001	0.489038	8.9338	Up	0.617044	0.707916
MLOC_8759.1	Uncharacterized protein	lysine-specific demethylase 5c-like	207	0	1	0.001	0.489038	8.9338	Up	0.617044	0.703187
MLOC_25363.1	Uncharacterized protein	af466646_7 polyprotein	207	0	1	0.001	0.489038	8.9338	Up	0.617044	0.702527
MLOC_9085.1	Uncharacterized protein	2799890 zinc knuckle domain containing	207	0	1	0.001	0.489038	8.9338	Up	0.617044	0.701869
MLOC_19546.1	Predicted protein (Uncharacterized protein)	rho gdp-dissociation inhibitor 1	624	0	3	0.001	0.486687	8.92685	Up	0.190372	0.284763
MLOC_60945.1	Uncharacterized protein	f-box domain containing expressed	1248	0	6	0.001	0.486687	8.92685	Up	0.0326238	0.0653673
MLOC_21188.1	Uncharacterized protein	2751355 os04g0684600	417	0	2	0.001	0.48552	8.92339	Up	0.342736	0.45174
MLOC_38764.1	Uncharacterized protein	PREDICTED: uncharacterized protein LOC100843700	417	0	2	0.001	0.48552	8.92339	Up	0.342736	0.450679
AK360526	Hordeum vulgare subsp. vulgare mRNA for predicted protein, partial cds, clone: NIASHv1119N19	nedd8-activating enzyme e1 regulatory subunit-like	1251	0	6	0.001	0.48552	8.92339	Up	0.0326238	0.065176
AK354923	Hordeum vulgare subsp. vulgare mRNA for predicted protein, complete cds, clone: NIASHv1013G22	probable serine incorporator-like	1251	0	6	0.001	0.48552	8.92339	Up	0.0326238	0.0651343
MLOC_10669.1	Predicted protein (Uncharacterized protein)	2771575 beta- -glucanase	1671	0	8	0.001	0.484648	8.92079	Up	0.0100652	0.0229323
AK377023	Hordeum vulgare subsp. vulgare mRNA for predicted protein, complete cds, clone: NIASHv3145N13	1311691 os05g0467400	1254	0	6	0.001	0.484358	8.91993	Up	0.0326238	0.0653973
MLOC_2873.1	Uncharacterized protein (Fragment)	ribonuclease h protein at1g65750-like	210	0	1	0.001	0.482052	8.91304	Up	0.617044	0.713691
MLOC_26678.1	Uncharacterized protein	reverse transcriptase	210	0	1	0.001	0.482052	8.91304	Up	0.617044	0.713615
MLOC_56924.1	Uncharacterized protein	ji23_horvu ame: full=23 kda jasmonate-induced protein	630	0	3	0.001	0.482052	8.91304	Up	0.190372	0.285643
MLOC_58506.12	Predicted protein (Uncharacterized protein)	1342881 auxin induced protein	420	0	2	0.001	0.482052	8.91304	Up	0.342736	0.457904
MLOC_42570.1	Uncharacterized protein	retrotransposon unclassified	210	0	1	0.001	0.482052	8.91304	Up	0.617044	0.711392
MLOC_32911.1	Uncharacterized protein (Fragment)	retrotransposon line subclass	210	0	1	0.001	0.482052	8.91304	Up	0.617044	0.705766
MLOC_11741.1	Uncharacterized protein	2847993 zinc finger protein	849	0	4	0.001	0.476942	8.89767	Up	0.105742	0.178935
MLOC_72016.2	Uncharacterized protein	gibberellin 2-oxidase	852	0	4	0.001	0.475262	8.89258	Up	0.105742	0.178575
MLOC_35677.1	Uncharacterized protein	retrotransposon unclassified	213	0	1	0.001	0.475262	8.89258	Up	0.617044	0.709445
MLOC_49376.1	Uncharacterized protein (Fragment)	1233656 protein rotundifolia like 15	213	0	1	0.001	0.475262	8.89258	Up	0.617044	0.705877
MLOC_9039.1	Uncharacterized protein (Fragment)	hypothetical protein SORBIDRAFT_03g034306	213	0	1	0.001	0.475262	8.89258	Up	0.617044	0.703224
MLOC_69737.1	Uncharacterized protein	cysteine proteinase	1071	0	5	0.001	0.4726	8.88447	Up	0.0587342	0.108065
MLOC_2989.1	Uncharacterized protein	dna-binding protein escarola-like	858	0	4	0.001	0.471939	8.88246	Up	0.105742	0.178258
MLOC_60212.1	Predicted protein (Uncharacterized protein)	ring-h2 finger protein atl70-like	429	0	2	0.001	0.471939	8.88246	Up	0.342736	0.450788
MLOC_17252.1	Uncharacterized protein	resistance protein rga2	1077	0	5	0.001	0.469967	8.87642	Up	0.0587342	0.108394
AK250544.1	-	surp and g-patch domain-containing protein 1-like	1293	0	6	0.001	0.469749	8.87575	Up	0.0326238	0.0652237
MLOC_9032.1	Uncharacterized protein (Fragment)	reverse transcriptase	216	0	1	0.001	0.468661	8.8724	Up	0.617044	0.712823
MLOC_8909.1	Uncharacterized protein (Fragment)	retrotransposon line subclass	432	0	2	0.001	0.468661	8.8724	Up	0.342736	0.45782
MLOC_1290.1	Uncharacterized protein	1636584 os10g0192300	432	0	2	0.001	0.468661	8.8724	Up	0.342736	0.455424
MLOC_80933.1	Uncharacterized protein	TPA: hypothetical protein ZEAMMB73_049070	432	0	2	0.001	0.468661	8.8724	Up	0.342736	0.452998
MLOC_5528.1	Predicted protein (Uncharacterized protein)	pentatricopeptide repeat-containing protein at5g02860-like	2379	0	11	0.001	0.46807	8.87058	Up	0.00172485	0.00465387
MLOC_6839.3	Uncharacterized protein	2611193 protein	870	0	4	0.001	0.465429	8.86242	Up	0.105742	0.178217
MLOC_64948.1	3-ketoacyl-CoA synthase (EC 2.3.1.-)	3-ketoacyl- synthase 11-like	1527	0	7	0.001	0.464058	8.85816	Up	0.0181208	0.0387547
MLOC_28994.1	Uncharacterized protein (Fragment)	af466646_7 polyprotein	219	0	1	0.001	0.462241	8.8525	Up	0.617044	0.713653
MLOC_2007.1	Uncharacterized protein (Fragment)	retrotransposon unclassified	219	0	1	0.001	0.462241	8.8525	Up	0.617044	0.708512
AK358761	Hordeum vulgare subsp. vulgare mRNA for predicted protein, partial cds, clone: NIASHv1082L02	peptidase m16	1317	0	6	0.001	0.461188	8.84921	Up	0.0326238	0.0653913
MLOC_5005.2	Predicted protein (Uncharacterized protein)	gdsl esterase lipase at2g40250-like	1101	0	5	0.001	0.459722	8.84462	Up	0.0587342	0.108477
AK367467	Hordeum vulgare subsp. vulgare mRNA for predicted protein, complete cds, clone: NIASHv2057K19	sugar transport protein 5-like	1545	0	7	0.001	0.458651	8.84125	Up	0.0181208	0.0387965
MLOC_21919.1	Uncharacterized protein (Fragment)	TPA: hypothetical protein ZEAMMB73_072370	663	0	3	0.001	0.458058	8.83939	Up	0.190372	0.285153
MLOC_82087.1	Uncharacterized protein	disease resistance protein rpm1-like	885	0	4	0.001	0.457541	8.83776	Up	0.105742	0.178991
MLOC_36537.2	Uncharacterized protein	retrotransposon unclassified	885	0	4	0.001	0.457541	8.83776	Up	0.105742	0.178272
MLOC_20729.1	Uncharacterized protein	metal ion binding protein	444	0	2	0.001	0.455995	8.83287	Up	0.342736	0.458212
MLOC_35189.1	Uncharacterized protein	phosphatidylinositide phosphatase sac1-like	222	0	1	0.001	0.455995	8.83287	Up	0.617044	0.70814
MLOC_29641.1	Uncharacterized protein	retrotransposon unclassified	222	0	1	0.001	0.455995	8.83287	Up	0.617044	0.704069
MLOC_13234.2	Uncharacterized protein	powdery mildew resistance protein pm3 variant	2229	0	10	0.001	0.454154	8.82704	Up	0.00310532	0.00797082
MLOC_43626.1	Predicted protein (Uncharacterized protein)	1006292 os01g0219300	447	0	2	0.001	0.452934	8.82316	Up	0.342736	0.457065
MLOC_57043.1	Predicted protein (Uncharacterized protein)	c vif2	672	0	3	0.001	0.451923	8.81993	Up	0.190372	0.284743
MLOC_7912.1	Uncharacterized protein (Fragment)	retrotransposon unclassified	450	0	2	0.001	0.449915	8.81351	Up	0.342736	0.457456
AK369798	Hordeum vulgare subsp. vulgare mRNA for predicted protein, complete cds, clone: NIASHv2098G24	2675917 actin	1125	0	5	0.001	0.449915	8.81351	Up	0.0587342	0.108376
MLOC_76896.1	Uncharacterized protein	upf0481 protein at3g47200-like	1575	0	7	0.001	0.449915	8.81351	Up	0.0181208	0.0387851
MLOC_60258.2	-	599177 os11g0448700	450	0	2	0.001	0.449915	8.81351	Up	0.342736	0.453218
MLOC_81179.1	Uncharacterized protein (Fragment)	reverse transcriptase	225	0	1	0.001	0.449915	8.81351	Up	0.617044	0.704806
MLOC_27198.1	Uncharacterized protein (Fragment)	retrotransposon unclassified	675	0	3	0.001	0.449915	8.81351	Up	0.190372	0.28383
MLOC_16483.3	Uncharacterized protein	1323556 at5g46220	903	0	4	0.001	0.44842	8.80871	Up	0.105742	0.177791
MLOC_58539.1	Uncharacterized protein	protein kinase xa21	3165	0	14	0.001	0.447783	8.80665	Up	0.000295584	0.000913311
MLOC_78412.1	Uncharacterized protein	carboxyl-terminal peptidase precursor	1140	0	5	0.001	0.443995	8.7944	Up	0.0587342	0.108385
MLOC_29336.1	Uncharacterized protein (Fragment)	ccr4-not transcription complex subunit 1-like	228	0	1	0.001	0.443995	8.7944	Up	0.617044	0.708922
MLOC_33608.1	Uncharacterized protein (Fragment)	ribonuclease h protein at1g65750-like	228	0	1	0.001	0.443995	8.7944	Up	0.617044	0.703334
MLOC_75184.1	Uncharacterized protein	pentatricopeptide repeat-containing protein at3g13880-like	2283	0	10	0.001	0.443412	8.7925	Up	0.00310532	0.00798114
MLOC_6230.1	Uncharacterized protein	probable receptor-like protein kinase at5g39030-like	1143	0	5	0.001	0.44283	8.79061	Up	0.0587342	0.108468
AK369366	Hordeum vulgare subsp. vulgare mRNA for predicted protein, partial cds, clone: NIASHv2089O15	glutathione s-transferase	915	0	4	0.001	0.442539	8.78966	Up	0.105742	0.178548
MLOC_79378.1	Uncharacterized protein	protein	687	0	3	0.001	0.442056	8.78809	Up	0.190372	0.284082
MLOC_5865.2	Uncharacterized protein	retrotransposon unclassified	462	0	2	0.001	0.438229	8.77554	Up	0.342736	0.459281
AK370831	Hordeum vulgare subsp. vulgare mRNA for predicted protein, complete cds, clone: NIASHv2117O03	2606858 protein	1386	0	6	0.001	0.438229	8.77554	Up	0.0326238	0.0655357
MLOC_58801.1	Uncharacterized protein (Fragment)	reverse transcriptase	231	0	1	0.001	0.438229	8.77554	Up	0.617044	0.711655
MLOC_2085.1	Uncharacterized protein	gdsl esterase lipase at1g71250-like	231	0	1	0.001	0.438229	8.77554	Up	0.617044	0.71128
MLOC_6888.2	Uncharacterized protein	pgps d12	462	0	2	0.001	0.438229	8.77554	Up	0.342736	0.45487
MLOC_5285.1	Uncharacterized protein (Fragment)	ribonuclease h protein at1g65750-like	231	0	1	0.001	0.438229	8.77554	Up	0.617044	0.705988
MLOC_60054.1	Uncharacterized protein (Fragment)	retrotransposon line expressed	231	0	1	0.001	0.438229	8.77554	Up	0.617044	0.704364
AK250845.1	-	ml domain protein precursor	462	0	2	0.001	0.438229	8.77554	Up	0.342736	0.450246
MLOC_41306.1	Uncharacterized protein	transposon en spm sub-class	231	0	1	0.001	0.438229	8.77554	Up	0.617044	0.701649
MLOC_1772.1	Uncharacterized protein	2884136 os09g0363500	1389	0	6	0.001	0.437282	8.77242	Up	0.0326238	0.0654274
MLOC_63768.1	Uncharacterized protein	599336 os11g0247500	930	0	4	0.001	0.435402	8.7662	Up	0.105742	0.177545
MLOC_69448.2	Uncharacterized protein	aldose reductase	933	0	4	0.001	0.434002	8.76156	Up	0.105742	0.17906
MLOC_59298.1	Uncharacterized protein	1308941 os05g0390300	933	0	4	0.001	0.434002	8.76156	Up	0.105742	0.178327
MLOC_15832.1	Uncharacterized protein	snap25 homologous protein snap33-like	933	0	4	0.001	0.434002	8.76156	Up	0.105742	0.178079
MLOC_80713.1	Uncharacterized protein (Fragment)	transposon pong sub-class	234	0	1	0.001	0.43261	8.75692	Up	0.617044	0.70547
MLOC_42866.1	Uncharacterized protein	hypothetical protein OsI_35400	234	0	1	0.001	0.43261	8.75692	Up	0.617044	0.702491
MLOC_42524.1	Uncharacterized protein (Fragment)	retrotransposon unclassified	234	0	1	0.001	0.43261	8.75692	Up	0.617044	0.701759
MLOC_60750.1	Predicted protein (Uncharacterized protein)	1847015 os01g0875800	1173	0	5	0.001	0.431504	8.75323	Up	0.0587342	0.108102
AK366868	Hordeum vulgare subsp. vulgare mRNA for predicted protein, complete cds, clone: NIASHv2047J22	753440 c-terminal region family expressed	939	0	4	0.001	0.431228	8.75231	Up	0.105742	0.178368
MLOC_61106.1	Uncharacterized protein	probable glutathione s-transferase gstu6-like	708	0	3	0.001	0.428944	8.74465	Up	0.190372	0.285584
MLOC_41381.1	Uncharacterized protein	retrotransposon unclassified	237	0	1	0.001	0.427134	8.73855	Up	0.617044	0.712333
MLOC_29243.1	Uncharacterized protein	PREDICTED: uncharacterized protein LOC100840175	474	0	2	0.001	0.427134	8.73855	Up	0.342736	0.45768
AK376129	Hordeum vulgare subsp. vulgare mRNA for predicted protein, complete cds, clone: NIASHv3115F22	2703028 homeodomain-like transcription factor superfamily protein	1896	0	8	0.001	0.427134	8.73855	Up	0.0100652	0.0229466
MLOC_42913.1	Uncharacterized protein (Fragment)	retrotransposon ty1-copia subclass	237	0	1	0.001	0.427134	8.73855	Up	0.617044	0.706173
MLOC_11323.1	Uncharacterized protein	transposon en spm sub- expressed	474	0	2	0.001	0.427134	8.73855	Up	0.342736	0.452697
MLOC_3290.1	Uncharacterized protein (Fragment)	1634161 os04g0563500	237	0	1	0.001	0.427134	8.73855	Up	0.617044	0.705581
MLOC_8395.1	Uncharacterized protein (Fragment)	cysteine-rich receptor-like protein kinase 23-like	237	0	1	0.001	0.427134	8.73855	Up	0.617044	0.702821
MLOC_2900.1	Uncharacterized protein (Fragment)	retrotransposon unclassified	237	0	1	0.001	0.427134	8.73855	Up	0.617044	0.701905
AK353805	Hordeum vulgare subsp. vulgare mRNA for predicted protein, complete cds, clone: NIASHv1002N22	epoxide hydrolase 4-like	954	0	4	0.001	0.424448	8.72944	Up	0.105742	0.178769
MLOC_25495.1	Uncharacterized protein	TPA: hypothetical protein ZEAMMB73_049070	480	0	2	0.001	0.421795	8.7204	Up	0.342736	0.456926
MLOC_62661.1	Uncharacterized protein (Fragment)	retrotransposon unclassified	240	0	1	0.001	0.421795	8.7204	Up	0.617044	0.711055
MLOC_35704.1	Uncharacterized protein (Fragment)	ribonuclease h protein at1g65750-like	240	0	1	0.001	0.421795	8.7204	Up	0.617044	0.708326
MLOC_35435.1	Uncharacterized protein	343578 proline-rich protein	480	0	2	0.001	0.421795	8.7204	Up	0.342736	0.45396
MLOC_4088.1	Uncharacterized protein	cysteine-rich receptor-like protein kinase 23-like	240	0	1	0.001	0.421795	8.7204	Up	0.617044	0.703518
MLOC_75964.1	Uncharacterized protein	60822 os06g0153600	240	0	1	0.001	0.421795	8.7204	Up	0.617044	0.702711
AK375575	Hordeum vulgare subsp. vulgare mRNA for predicted protein, partial cds, clone: NIASHv3098F17	udp-glycosyltransferase 75d1-like	1443	0	6	0.001	0.420918	8.7174	Up	0.0326238	0.0654394
AK364709	Hordeum vulgare subsp. vulgare mRNA for predicted protein, complete cds, clone: NIASHv2027M04	phi-1-like phosphate-induced protein	963	0	4	0.001	0.420481	8.7159	Up	0.105742	0.177586
MLOC_60975.2	Uncharacterized protein	carotenoid (9 )-cleavage dioxygenase 1-like	1929	0	8	0.001	0.419827	8.71365	Up	0.0100652	0.022949
MLOC_77956.1	Uncharacterized protein (Fragment)	ribonuclease h protein at1g65750-like	483	0	2	0.001	0.419175	8.71141	Up	0.342736	0.454484
AK365370	Hordeum vulgare subsp. vulgare mRNA for predicted protein, complete cds, clone: NIASHv2033L23	protein	969	0	4	0.001	0.417878	8.70694	Up	0.105742	0.177723
MLOC_20284.1	Uncharacterized protein (Fragment)		486	0	2	0.001	0.416588	8.70248	Up	0.342736	0.459591
MLOC_42266.1	Uncharacterized protein (Fragment)	retrotransposon unclassified	486	0	2	0.001	0.416588	8.70248	Up	0.342736	0.459253
MLOC_71799.1	Uncharacterized protein (Fragment)	ribonuclease h protein at1g65750-like	243	0	1	0.001	0.416588	8.70248	Up	0.617044	0.707285
MLOC_2642.1	Uncharacterized protein (Fragment)	mitochondrial atp synthase 6 kda subunit	243	0	1	0.001	0.416588	8.70248	Up	0.617044	0.705729
MLOC_32042.1	Uncharacterized protein (Fragment)	retrotransposon unclassified	243	0	1	0.001	0.416588	8.70248	Up	0.617044	0.705138
MLOC_23884.1	Uncharacterized protein	b3 domain-containing protein os12g0592300-like	1218	0	5	0.001	0.415562	8.69892	Up	0.0587342	0.108157
AK361221	Hordeum vulgare subsp. vulgare mRNA for predicted protein, complete cds, clone: NIASHv1135F23	1326583 os05g0521900	489	0	2	0.001	0.414032	8.6936	Up	0.342736	0.452806
MLOC_19416.1	Uncharacterized protein	retrotransposon unclassified	489	0	2	0.001	0.414032	8.6936	Up	0.342736	0.449219
MLOC_51430.2	Uncharacterized protein	1848680 os04g0381500	420	2	1030	0.602302	248.257	8.68713	Up	1.13e-258	1.18e-256
MLOC_52437.1	Uncharacterized protein (Fragment)	retrotransposon line subclass	492	0	2	0.001	0.411508	8.68478	Up	0.342736	0.454511
MLOC_30152.1	Uncharacterized protein (Fragment)	reverse transcriptase	246	0	1	0.001	0.411508	8.68478	Up	0.617044	0.707173
MLOC_30538.1	Uncharacterized protein	reverse transcriptase	246	0	1	0.001	0.411508	8.68478	Up	0.617044	0.704253
MLOC_81246.1	Uncharacterized protein	2651761 transposase	1974	0	8	0.001	0.410257	8.68038	Up	0.0100652	0.0229706
MLOC_47994.1	Uncharacterized protein	pectinesterase inhibitor domain containing protein	438	6	3063	1.73265	707.923	8.67447	Up	0	0
AK375409	Hordeum vulgare subsp. vulgare mRNA for predicted protein, complete cds, clone: NIASHv3093H05	24116 udp-glucose: flavonoid 7-o-glucosyltransferase	1488	0	6	0.001	0.408189	8.67309	Up	0.0326238	0.0655056
AK374560	Hordeum vulgare subsp. vulgare mRNA for predicted protein, complete cds, clone: NIASHv3069B24	gaga-binding transcriptional activator	993	0	4	0.001	0.407778	8.67164	Up	0.105742	0.17881
MLOC_27973.1	Uncharacterized protein (Fragment)	retrotransposon expressed	249	0	1	0.001	0.40655	8.66729	Up	0.617044	0.710193
MLOC_77885.1	Uncharacterized protein (Fragment)	cysteine-rich receptor-like protein kinase 23-like	249	0	1	0.001	0.40655	8.66729	Up	0.617044	0.705101
MLOC_66858.1	Uncharacterized protein	l-type lectin-domain containing receptor kinase -like	2010	0	8	0.001	0.402909	8.65431	Up	0.0100652	0.0229084
MLOC_58984.1	Uncharacterized protein (Fragment)	2844735 os02g0189400	252	0	1	0.001	0.40171	8.65001	Up	0.617044	0.712182
MLOC_47382.1	Uncharacterized protein	1634525 os05g0315401	504	0	2	0.001	0.40171	8.65001	Up	0.342736	0.455701
MLOC_33381.1	Uncharacterized protein	retrotransposon line subclass	252	0	1	0.001	0.40171	8.65001	Up	0.617044	0.70881
MLOC_52335.1	Predicted protein (Uncharacterized protein)	undecaprenyl pyrophosphate synthetase	756	0	3	0.001	0.40171	8.65001	Up	0.190372	0.283946
MLOC_37211.1	Uncharacterized protein	PREDICTED: uncharacterized protein LOC100839426	252	0	1	0.001	0.40171	8.65001	Up	0.617044	0.703591
MLOC_68369.1	Uncharacterized protein	retrotransposon ty1-copia subclass	1011	0	4	0.001	0.400518	8.64572	Up	0.105742	0.178134
MLOC_19822.1	Uncharacterized protein	c2h2 zinc finger protein	507	0	2	0.001	0.399333	8.64145	Up	0.342736	0.452314
MLOC_19326.1	Uncharacterized protein	2607310 protein	255	0	1	0.001	0.396984	8.63294	Up	0.617044	0.712521
MLOC_13605.1	Predicted protein (Uncharacterized protein)	1666921 os03g0298100	510	0	2	0.001	0.396984	8.63294	Up	0.342736	0.458297
MLOC_3288.1	Uncharacterized protein	1632399 os01g0137100	765	0	3	0.001	0.396984	8.63294	Up	0.190372	0.284568
MLOC_29003.1	Uncharacterized protein	reverse transcriptase	255	0	1	0.001	0.396984	8.63294	Up	0.617044	0.706839
MLOC_1367.1	Uncharacterized protein (Fragment)	retrotransposon unclassified	255	0	1	0.001	0.396984	8.63294	Up	0.617044	0.704548
MLOC_56092.1	Uncharacterized protein	bcl-2 binding anthanogene-1	510	0	2	0.001	0.396984	8.63294	Up	0.342736	0.450327
MLOC_38505.1	Uncharacterized protein	protein argonaute 1d-like	1536	0	6	0.001	0.395433	8.62729	Up	0.0326238	0.0654334
MLOC_37301.1	Uncharacterized protein	ill8_orysj ame: full=iaa-amino acid hydrolase ilr1-like 8 flags: precursor	1287	0	5	0.001	0.393282	8.61942	Up	0.0587342	0.108367
MLOC_77876.1	Uncharacterized protein (Fragment)	dna helicase	258	0	1	0.001	0.392368	8.61606	Up	0.617044	0.711017
MLOC_9120.1	Uncharacterized protein	retrotransposon unclassified	516	0	2	0.001	0.392368	8.61606	Up	0.342736	0.454926
MLOC_69227.1	Predicted protein (Uncharacterized protein)	tpd1 precursor	516	0	2	0.001	0.392368	8.61606	Up	0.342736	0.453795
MLOC_15415.1	Uncharacterized protein		516	0	2	0.001	0.392368	8.61606	Up	0.342736	0.449596
AK370036	Hordeum vulgare subsp. vulgare mRNA for predicted protein, complete cds, clone: NIASHv2103P19	2615023 protein	1557	0	6	0.001	0.3901	8.6077	Up	0.0326238	0.0654695
MLOC_67285.1	Uncharacterized protein	uncharacterized transporter lpg1691-like	519	0	2	0.001	0.3901	8.6077	Up	0.342736	0.449813
MLOC_62432.1	Uncharacterized protein	subtilisin-like protease-like	2337	0	9	0.001	0.389849	8.60677	Up	0.00559068	0.0135884
MLOC_21736.1	Peroxidase (EC 1.11.1.7)	peroxidase 2-like	1041	0	4	0.001	0.388975	8.60354	Up	0.105742	0.178437
AK375710	Hordeum vulgare subsp. vulgare mRNA for predicted protein, complete cds, clone: NIASHv3102B04	beta-hexosaminidase subunit b2-like	1563	0	6	0.001	0.388602	8.60215	Up	0.0326238	0.0652954
MLOC_10246.1	Uncharacterized protein	mikc-type mads-box transcription factor wm31b	261	0	1	0.001	0.387858	8.59938	Up	0.617044	0.711843
MLOC_17037.1	Uncharacterized protein	pectinmethylesterase inhibitor	522	0	2	0.001	0.387858	8.59938	Up	0.342736	0.454898
MLOC_60623.1	Predicted protein (Uncharacterized protein)	af109193_1eca1 protein	522	0	2	0.001	0.387858	8.59938	Up	0.342736	0.452041
MLOC_37843.1	Predicted protein (Uncharacterized protein)	nac domain ipr003441	786	0	3	0.001	0.386377	8.59387	Up	0.190372	0.285408
AK356899	Hordeum vulgare subsp. vulgare mRNA for predicted protein, complete cds, clone: NIASHv1041L19	tpa: nac domain transcription factor superfamily partial	525	0	2	0.001	0.385641	8.59112	Up	0.342736	0.457848
AK252867.1	-	437657 actin- expressed	1053	0	4	0.001	0.384543	8.587	Up	0.105742	0.179074
MLOC_69983.1	Uncharacterized protein	hypothetical protein SORBIDRAFT_04g009040	264	0	1	0.001	0.38345	8.5829	Up	0.617044	0.7132
AK372735	Hordeum vulgare subsp. vulgare mRNA for predicted protein, complete cds, clone: NIASHv3010N04	2605741 protein	528	0	2	0.001	0.38345	8.5829	Up	0.342736	0.45796
AK376242	Hordeum vulgare subsp. vulgare mRNA for predicted protein, complete cds, clone: NIASHv3118O05	probable s-acyltransferase at3g18620-like	1056	0	4	0.001	0.38345	8.5829	Up	0.105742	0.1787
MLOC_37850.1	Uncharacterized protein (Fragment)	ribonuclease h protein at1g65750-like	264	0	1	0.001	0.38345	8.5829	Up	0.617044	0.709407
AK248829.1	-	26s proteasome non-atpase regulatory subunit 5	1584	0	6	0.001	0.38345	8.5829	Up	0.0326238	0.0653613
MLOC_1708.1	Uncharacterized protein	2892446 protein	528	0	2	0.001	0.38345	8.5829	Up	0.342736	0.452368
AK367845	Hordeum vulgare subsp. vulgare mRNA for predicted protein, complete cds, clone: NIASHv2063H18	2610323 protein	945	2	956	0.26769	102.409	8.57957	Up	7.65e-240	7.56e-238
MLOC_70514.1	Uncharacterized protein	PREDICTED: uncharacterized protein LOC100842519	534	0	2	0.001	0.379142	8.56659	Up	0.342736	0.449515
AK376834	Hordeum vulgare subsp. vulgare mRNA for predicted protein, complete cds, clone: NIASHv3137I02	cyclin-dependent kinase inhibitor 1-like	804	0	3	0.001	0.377727	8.5612	Up	0.190372	0.284997
MLOC_56246.1	Uncharacterized protein (Fragment)	retrotransposon unclassified	270	0	1	0.001	0.374929	8.55047	Up	0.617044	0.713578
MLOC_51369.1	Uncharacterized protein		270	0	1	0.001	0.374929	8.55047	Up	0.617044	0.712973
AK371972	Hordeum vulgare subsp. vulgare mRNA for predicted protein, partial cds, clone: NIASHv2144D18	g-type lectin s-receptor-like serine threonine-protein kinase at2g19130-like isoform 1	1890	0	7	0.001	0.374929	8.55047	Up	0.0181208	0.0388041
MLOC_30469.1	Uncharacterized protein (Fragment)	retrotransposon line subclass	270	0	1	0.001	0.374929	8.55047	Up	0.617044	0.710043
AK366623	Hordeum vulgare subsp. vulgare mRNA for predicted protein, complete cds, clone: NIASHv2045A04	protein sensitive to proton rhizotoxicity 1-like	1080	0	4	0.001	0.374929	8.55047	Up	0.105742	0.178189
AK251900.1	-	peroxidase 2-like	1083	0	4	0.001	0.373891	8.54647	Up	0.105742	0.178686
AK360686	Hordeum vulgare subsp. vulgare mRNA for predicted protein, complete cds, clone: NIASHv1123F18	60s ribosomal protein l4	1086	0	4	0.001	0.372858	8.54248	Up	0.105742	0.178162
AK248622.1	-	sucrose synthase	2424	76	35264	3.96565	1472.69	8.53668	Up	0	0
MLOC_28197.1	Uncharacterized protein (Fragment)	ribonuclease h protein at1g65750-like	273	0	1	0.001	0.370809	8.53453	Up	0.617044	0.710942
MLOC_42519.1	Uncharacterized protein (Fragment)	retrotransposon unclassified	273	0	1	0.001	0.370809	8.53453	Up	0.617044	0.709258
MLOC_52012.1	Uncharacterized protein (Fragment)	retrotransposon unclassified	273	0	1	0.001	0.370809	8.53453	Up	0.617044	0.708363
MLOC_2313.1	Uncharacterized protein (Fragment)	retrotransposon unclassified	273	0	1	0.001	0.370809	8.53453	Up	0.617044	0.705249
MLOC_27229.1	Uncharacterized protein	retrotransposon unclassified	273	0	1	0.001	0.370809	8.53453	Up	0.617044	0.701576
AK370046	Hordeum vulgare subsp. vulgare mRNA for predicted protein, complete cds, clone: NIASHv2104C07	protein kinase domain containing expressed	1641	0	6	0.001	0.370131	8.53189	Up	0.0326238	0.0655598
MLOC_36972.2	Pectinesterase (EC 3.1.1.11)	pectin methylesterase	1644	0	6	0.001	0.369456	8.52926	Up	0.0326238	0.0652118
MLOC_36743.5	Uncharacterized protein	retrotransposon unclassified	549	0	2	0.001	0.368783	8.52663	Up	0.342736	0.458016
MLOC_54993.1	Uncharacterized protein (Fragment)	1850895 os08g0521300	276	0	1	0.001	0.366778	8.51877	Up	0.617044	0.710829
MLOC_66049.1	Uncharacterized protein (Fragment)	1847617 os02g0623400	552	0	2	0.001	0.366778	8.51877	Up	0.342736	0.45584
MLOC_48071.1	Uncharacterized protein (Fragment)	ribonuclease h protein at1g65750-like	276	0	1	0.001	0.366778	8.51877	Up	0.617044	0.704953
MLOC_13432.1	Uncharacterized protein	hypothetical protein ZEAMMB73_357110	552	0	2	0.001	0.366778	8.51877	Up	0.342736	0.451713
MLOC_13193.1	Uncharacterized protein	2605873 protein	552	0	2	0.001	0.366778	8.51877	Up	0.342736	0.449381
AK354661	Hordeum vulgare subsp. vulgare mRNA for predicted protein, partial cds, clone: NIASHv1009L12	1015822 ww domain-containing expressed	1107	0	4	0.001	0.365784	8.51485	Up	0.105742	0.178244
MLOC_79387.1	Uncharacterized protein		555	0	2	0.001	0.364796	8.51095	Up	0.342736	0.45087
MLOC_41666.1	Uncharacterized protein (Fragment)	reverse transcriptase	279	0	1	0.001	0.362835	8.50317	Up	0.617044	0.711242
MLOC_58202.1	Uncharacterized protein	ubiquitin-protein expressed	1395	0	5	0.001	0.362835	8.50317	Up	0.0587342	0.108358
MLOC_74545.1	Uncharacterized protein	retrotransposon unclassified	558	0	2	0.001	0.362835	8.50317	Up	0.342736	0.44984
MLOC_30017.1	Uncharacterized protein	retrotransposon unclassified	558	0	2	0.001	0.362835	8.50317	Up	0.342736	0.449759
MLOC_921.1	Uncharacterized protein	cyclin m	279	0	1	0.001	0.362835	8.50317	Up	0.617044	0.70154
MLOC_68853.1	Uncharacterized protein	1847875 os02g0729300	840	0	3	0.001	0.361539	8.49801	Up	0.190372	0.285722
AK365889	Hordeum vulgare subsp. vulgare mRNA for predicted protein, complete cds, clone: NIASHv2038J13	2612570 protein	1122	0	4	0.001	0.360894	8.49543	Up	0.105742	0.178382
MLOC_56478.1	Uncharacterized protein	2881338 phloem-specific lectin-like	561	0	2	0.001	0.360894	8.49543	Up	0.342736	0.454705
MLOC_18670.1	Uncharacterized protein	2879962 pathogenesis-related protein pr-1	561	0	2	0.001	0.360894	8.49543	Up	0.342736	0.45155
MLOC_51431.1	Uncharacterized protein	48912 nbs-lrr class disease resistance protein	282	0	1	0.001	0.358975	8.48774	Up	0.617044	0.713011
MLOC_80527.1	Uncharacterized protein	hat family dimerisation domain containing expressed	282	0	1	0.001	0.358975	8.48774	Up	0.617044	0.705914
MLOC_11517.4	Uncharacterized protein	retrotransposon unclassified	564	0	2	0.001	0.358975	8.48774	Up	0.342736	0.45106
MLOC_62828.1	Uncharacterized protein	1322791 os05g0520600	567	0	2	0.001	0.357075	8.48008	Up	0.342736	0.458999
MLOC_11235.1	Uncharacterized protein	15851 prostrate growth 1	567	0	2	0.001	0.357075	8.48008	Up	0.342736	0.458465
MLOC_14949.1	Uncharacterized protein	reverse transcriptase	567	0	2	0.001	0.357075	8.48008	Up	0.342736	0.452286
MLOC_44851.1	Uncharacterized protein	14388 os02g0582600	570	0	2	0.001	0.355196	8.47247	Up	0.342736	0.45869
MLOC_64714.1	Predicted protein (Uncharacterized protein)	src2-like protein	570	0	2	0.001	0.355196	8.47247	Up	0.342736	0.456424
MLOC_64323.1	Uncharacterized protein	49909 embryogenesis transmembrane	2583	0	9	0.001	0.352721	8.46238	Up	0.00559068	0.013602
MLOC_28816.1	Uncharacterized protein	cysteine-rich receptor-like protein kinase 23-like	288	0	1	0.001	0.351496	8.45736	Up	0.617044	0.710155
MLOC_28703.1	Uncharacterized protein (Fragment)	retrotransposon line subclass	288	0	1	0.001	0.351496	8.45736	Up	0.617044	0.708475
MLOC_54458.1	Uncharacterized protein	ef hand family protein	288	0	1	0.001	0.351496	8.45736	Up	0.617044	0.708289
MLOC_32083.1	Uncharacterized protein	reverse transcriptase	288	0	1	0.001	0.351496	8.45736	Up	0.617044	0.705322
MLOC_28567.1	Uncharacterized protein	cysteine-rich receptor-like protein kinase 23-like	288	0	1	0.001	0.351496	8.45736	Up	0.617044	0.702931
MLOC_25115.1	Uncharacterized protein	retrotransposon unclassified	288	0	1	0.001	0.351496	8.45736	Up	0.617044	0.701503
MLOC_36497.1	Uncharacterized protein	af466646_7 polyprotein	291	0	1	0.001	0.347872	8.44241	Up	0.617044	0.707248
MLOC_64411.1	Uncharacterized protein (Fragment)	retrotransposon unclassified	291	0	1	0.001	0.347872	8.44241	Up	0.617044	0.706914
MLOC_28145.1	Uncharacterized protein	retrotransposon unclassified	291	0	1	0.001	0.347872	8.44241	Up	0.617044	0.706099
MLOC_6285.1	Uncharacterized protein	upf0392 protein rcom_0530710-like	1746	0	6	0.001	0.347872	8.44241	Up	0.0326238	0.0652715
MLOC_23872.1	Uncharacterized protein	major allergen phl p 5	873	0	3	0.001	0.347872	8.44241	Up	0.190372	0.284043
MLOC_44544.1	Predicted protein (Uncharacterized protein)	14355 os02g0666600	585	0	2	0.001	0.346088	8.435	Up	0.342736	0.450462
MLOC_79670.1	Uncharacterized protein	2837185 os08g0553400	585	0	2	0.001	0.346088	8.435	Up	0.342736	0.450408
MLOC_74058.1	Uncharacterized protein	y1071_orysj ame: full= b3 domain-containing protein os10g0537100	879	0	3	0.001	0.345498	8.43253	Up	0.190372	0.283636
MLOC_77121.1	Uncharacterized protein	13908 ubiquitin conjugating enzyme 7 interacting protein 4	1176	0	4	0.001	0.344323	8.42762	Up	0.105742	0.178203
AK368718	Hordeum vulgare subsp. vulgare mRNA for predicted protein, complete cds, clone: NIASHv2078J15	glucan endo- -beta-glucosidase 14-like	1182	0	4	0.001	0.342575	8.42028	Up	0.105742	0.178423
MLOC_56166.1	Uncharacterized protein	protein phosphatase 2c 24-like	591	0	2	0.001	0.342575	8.42028	Up	0.342736	0.453657
MLOC_78662.1	Uncharacterized protein	hypothetical protein SORBIDRAFT_05g009986	1479	0	5	0.001	0.342227	8.41881	Up	0.0587342	0.108449
MLOC_33802.4	E3 ubiquitin-protein ligase (EC 6.3.2.-)	e3 ubiquitin-protein ligase sina-like 7-like	894	0	3	0.001	0.339701	8.40812	Up	0.190372	0.283675
MLOC_12624.1	Uncharacterized protein	jumonji-like transcription factor family protein	2988	0	10	0.001	0.338791	8.40425	Up	0.00310532	0.0079624
MLOC_3103.1	E3 ubiquitin-protein ligase (EC 6.3.2.-)	e3 ubiquitin-protein ligase sina-like 7-like	900	0	3	0.001	0.337436	8.39847	Up	0.190372	0.285467
MLOC_78483.1	Uncharacterized protein (Fragment)	retrotransposon line subclass	300	0	1	0.001	0.337436	8.39847	Up	0.617044	0.710605
MLOC_28102.1	Uncharacterized protein (Fragment)	1631958 os02g0465056	300	0	1	0.001	0.337436	8.39847	Up	0.617044	0.703849
MLOC_68093.1	Uncharacterized protein (Fragment)	60822 os06g0153600	603	0	2	0.001	0.335757	8.39128	Up	0.342736	0.454456
MLOC_58278.2	Auxin-responsive protein	auxin-responsive protein iaa29-like	603	0	2	0.001	0.335757	8.39128	Up	0.342736	0.450707
MLOC_71298.1	Uncharacterized protein	u-box domain-containing protein 33-like	1815	0	6	0.001	0.334647	8.3865	Up	0.0326238	0.0655719
MLOC_24279.1	Uncharacterized protein	2895003 protein	609	0	2	0.001	0.332449	8.37699	Up	0.342736	0.460043
MLOC_3808.1	Uncharacterized protein	reverse transcriptase	609	0	2	0.001	0.332449	8.37699	Up	0.342736	0.454732
MLOC_30945.1	Uncharacterized protein	transposon pong sub-class	306	0	1	0.001	0.33082	8.3699	Up	0.617044	0.701978
AK376684	Hordeum vulgare subsp. vulgare mRNA for predicted protein, complete cds, clone: NIASHv3131K21	pyridoxine biosynthesis protein	921	0	3	0.001	0.329742	8.36519	Up	0.190372	0.284919
MLOC_64059.1	Uncharacterized protein	gem-like protein 4-like	615	0	2	0.001	0.329206	8.36285	Up	0.342736	0.459874
MLOC_81887.1	Uncharacterized protein	reverse transcriptase	615	0	2	0.001	0.329206	8.36285	Up	0.342736	0.455092
MLOC_3735.1	Uncharacterized protein	ribonuclease h protein at1g65750-like	615	0	2	0.001	0.329206	8.36285	Up	0.342736	0.45363
MLOC_51418.2	Uncharacterized protein	52 kda repressor of the inhibitor of the protein kinase	615	0	2	0.001	0.329206	8.36285	Up	0.342736	0.451441
MLOC_63363.1	Uncharacterized protein	cral trio domain sec14p-like phosphatidylinositol transfer family protein	1848	0	6	0.001	0.328672	8.3605	Up	0.0326238	0.0655297
AK363200	Hordeum vulgare subsp. vulgare mRNA for predicted protein, complete cds, clone: NIASHv2013G21	disease resistance protein rpm1-like	2772	0	9	0.001	0.328672	8.3605	Up	0.00559068	0.0135944
AK358550	Hordeum vulgare subsp. vulgare mRNA for predicted protein, complete cds, clone: NIASHv1078I06	e3 ubiquitin-protein ligase cop1-like	1236	0	4	0.001	0.327608	8.35583	Up	0.105742	0.178658
MLOC_22066.1	Uncharacterized protein	retrotransposon line subclass	309	0	1	0.001	0.327608	8.35583	Up	0.617044	0.706617
AK368922	Hordeum vulgare subsp. vulgare mRNA for predicted protein, partial cds, clone: NIASHv2082F22	cys2 his2 zinc-finger transcription factor	930	0	3	0.001	0.326551	8.35117	Up	0.190372	0.284607
MLOC_70762.1	Predicted protein (Uncharacterized protein)	reticuline oxidase-like	1551	0	5	0.001	0.326341	8.35023	Up	0.0587342	0.108093
MLOC_12163.1	Uncharacterized protein	retrotransposon unclassified	312	0	1	0.001	0.324458	8.34189	Up	0.617044	0.705433
MLOC_58490.1	Uncharacterized protein	hypothetical protein	624	0	2	0.001	0.324458	8.34189	Up	0.342736	0.449894
MLOC_32993.1	Uncharacterized protein	reverse transcriptase	942	0	3	0.001	0.322391	8.33267	Up	0.190372	0.284432
MLOC_25351.3	Uncharacterized protein	two-component response regulator arr12-like	630	0	2	0.001	0.321368	8.32808	Up	0.342736	0.450897
AK249682.1	-	2245430 pvr3-like protein	315	0	1	0.001	0.321368	8.32808	Up	0.617044	0.701686
AK251602.1	-	2697015 udp-arabinose 4-epimerase	1263	0	4	0.001	0.320604	8.32465	Up	0.105742	0.179018
MLOC_15356.1	Uncharacterized protein	protein	633	0	2	0.001	0.319845	8.32123	Up	0.342736	0.45523
MLOC_54072.1	Uncharacterized protein	2736531 os08g0539200	633	0	2	0.001	0.319845	8.32123	Up	0.342736	0.453547
MLOC_60587.1	Uncharacterized protein	1634204 os04g0599650	8262	0	26	0.001	0.318567	8.31545	Up	2.55e-07	1.18e-06
AK361655	Hordeum vulgare subsp. vulgare mRNA for predicted protein, complete cds, clone: NIASHv1145O13	pistil-specific extensin-like protein	954	0	3	0.001	0.318336	8.31441	Up	0.190372	0.285251
AK376298	Hordeum vulgare subsp. vulgare mRNA for predicted protein, complete cds, clone: NIASHv3120D02	transmembrane protein 63b-like	1272	0	4	0.001	0.318336	8.31441	Up	0.105742	0.178011
MLOC_34652.1	Uncharacterized protein	btb poz domain containing expressed	957	0	3	0.001	0.317338	8.30988	Up	0.190372	0.284899
MLOC_29564.1	Uncharacterized protein (Fragment)	ribonuclease h protein at1g65750-like	639	0	2	0.001	0.316841	8.30762	Up	0.342736	0.45634
MLOC_67964.1	Uncharacterized protein	2561742 at5g65030	639	0	2	0.001	0.316841	8.30762	Up	0.342736	0.451795
MLOC_44220.1	Uncharacterized protein (Fragment)	retrotransposon unclassified	321	0	1	0.001	0.315361	8.30086	Up	0.617044	0.707619
MLOC_17928.2	Uncharacterized protein	r2r3-myb protein	642	0	2	0.001	0.315361	8.30086	Up	0.342736	0.450273
MLOC_68849.1	Uncharacterized protein (Fragment)	retrotransposon unclassified	645	0	2	0.001	0.313894	8.29413	Up	0.342736	0.452861
AK251674.1	-	343578 proline-rich protein	645	0	2	0.001	0.313894	8.29413	Up	0.342736	0.451959
AK359592	Hordeum vulgare subsp. vulgare mRNA for predicted protein, complete cds, clone: NIASHv1099J12	la-related protein 1-like	1941	0	6	0.001	0.312924	8.28967	Up	0.0326238	0.0655116
MLOC_52704.1	Predicted protein (Uncharacterized protein)	oxygen evolving enhancer protein 3	648	0	2	0.001	0.312441	8.28744	Up	0.342736	0.455341
MLOC_51960.1	Uncharacterized protein	26127 myb family transcription factor	972	0	3	0.001	0.312441	8.28744	Up	0.190372	0.284529
MLOC_1528.1	Uncharacterized protein	germin-like protein 2-1-like	651	0	2	0.001	0.311001	8.28078	Up	0.342736	0.454373
MLOC_6471.1	Uncharacterized protein	copper methylamine oxidase-like	1965	0	6	0.001	0.309102	8.27194	Up	0.0326238	0.0652655
MLOC_1037.1	Uncharacterized protein	retrotransposon unclassified	657	0	2	0.001	0.308161	8.26754	Up	0.342736	0.449867
AK373214	Hordeum vulgare subsp. vulgare mRNA for predicted protein, complete cds, clone: NIASHv3023N13	berberine bridge enzyme	1644	0	5	0.001	0.30788	8.26622	Up	0.0587342	0.10833
MLOC_76374.2	Uncharacterized protein	protein far1-related sequence 5-like	330	0	1	0.001	0.30676	8.26097	Up	0.617044	0.713124
AK362577	Hordeum vulgare subsp. vulgare mRNA for predicted protein, complete cds, clone: NIASHv2008E10	transcription factor bhlh91-like	660	0	2	0.001	0.30676	8.26097	Up	0.342736	0.450029
MLOC_77559.2	Uncharacterized protein	aldose reductase	993	0	3	0.001	0.305833	8.2566	Up	0.190372	0.28486
AK376365	Hordeum vulgare subsp. vulgare mRNA for predicted protein, complete cds, clone: NIASHv3121L22	non-specific lipid-transfer protein	366	1	382	0.345583	105.656	8.25613	Up	5.41e-96	2.38e-94
MLOC_78042.1	Uncharacterized protein	2491087 os05g0100100	663	0	2	0.001	0.305372	8.25442	Up	0.342736	0.459648
MLOC_33244.1	Uncharacterized protein	2611922 protein	333	0	1	0.001	0.303997	8.24791	Up	0.617044	0.713426
MLOC_31417.1	Uncharacterized protein	reverse transcriptase	333	0	1	0.001	0.303997	8.24791	Up	0.617044	0.708698
AK369408	Hordeum vulgare subsp. vulgare mRNA for predicted protein, partial cds, clone: NIASHv2090K12	775855 ame: full=auxin response factor 11 ame: full= 5 ame: full= ame: full=protein monopteros-like	333	0	1	0.001	0.303997	8.24791	Up	0.617044	0.702161
MLOC_58957.1	Uncharacterized protein	2692756 xyloglucan 6-xylosyltransferase	1335	0	4	0.001	0.303313	8.24467	Up	0.105742	0.178299
MLOC_35469.3	Uncharacterized protein	predicted protein	669	0	2	0.001	0.302633	8.24143	Up	0.342736	0.456174
MLOC_74701.2	Predicted protein (Uncharacterized protein)	glutathione s-transferase 4-like	672	0	2	0.001	0.301282	8.23497	Up	0.342736	0.452971
MLOC_24915.1	Uncharacterized protein	1850913 os08g0208400	675	0	2	0.001	0.299943	8.22855	Up	0.342736	0.459196
AK370303	Hordeum vulgare subsp. vulgare mRNA for predicted protein, complete cds, clone: NIASHv2108I07	2688070 sterol delta7 reductase	1353	0	4	0.001	0.299278	8.22534	Up	0.105742	0.178824
MLOC_40538.1	Uncharacterized protein	ac090486_29 retroelement	678	0	2	0.001	0.298616	8.22215	Up	0.342736	0.459535
MLOC_68259.1	Predicted protein (Uncharacterized protein)	protein	1356	0	4	0.001	0.298616	8.22215	Up	0.105742	0.177874
MLOC_12940.1	Uncharacterized protein	protein argonaute 2-like	3060	0	9	0.001	0.297738	8.2179	Up	0.00559068	0.0135733
AK361166	Hordeum vulgare subsp. vulgare mRNA for predicted protein, complete cds, clone: NIASHv1134B23	root phototropism protein 3-like	1365	0	4	0.001	0.296647	8.2126	Up	0.105742	0.178617
MLOC_30710.1	Uncharacterized protein	hat family dimerisation domain containing protein	342	0	1	0.001	0.295997	8.20944	Up	0.617044	0.710754
MLOC_55510.1	Uncharacterized protein	transposon mutator sub-class	342	0	1	0.001	0.295997	8.20944	Up	0.617044	0.71008
MLOC_15768.1	Uncharacterized protein (Fragment)	f-box domain containing protein	684	0	2	0.001	0.295997	8.20944	Up	0.342736	0.45308
MLOC_52189.1	Uncharacterized protein	non-ltr retroelement reverse transcriptase	342	0	1	0.001	0.295997	8.20944	Up	0.617044	0.705396
MLOC_75706.1	Uncharacterized protein	ribonuclease h protein at1g65750-like	342	0	1	0.001	0.295997	8.20944	Up	0.617044	0.705359
AK360424	Hordeum vulgare subsp. vulgare mRNA for predicted protein, complete cds, clone: NIASHv1117N05	probable receptor-like protein kinase at1g67000-like	2055	0	6	0.001	0.295565	8.20733	Up	0.0326238	0.0652297
AK364780	Hordeum vulgare subsp. vulgare mRNA for predicted protein, complete cds, clone: NIASHv2028F09	954821 otu-like cysteine protease family protein	1029	0	3	0.001	0.295134	8.20522	Up	0.190372	0.28584
MLOC_76200.2	Uncharacterized protein	reverse transcriptase	687	0	2	0.001	0.294704	8.20312	Up	0.342736	0.459507
MLOC_26247.1	Uncharacterized protein	1633809 partial	345	0	1	0.001	0.293423	8.19684	Up	0.617044	0.708102
MLOC_75321.1	Uncharacterized protein (Fragment)	retrotransposon unclassified	345	0	1	0.001	0.293423	8.19684	Up	0.617044	0.702601
MLOC_2701.1	Uncharacterized protein	reverse transcriptase	693	0	2	0.001	0.292153	8.19058	Up	0.342736	0.455452
AK371975	Hordeum vulgare subsp. vulgare mRNA for predicted protein, complete cds, clone: NIASHv2144F08	subtilisin-like protease-like	2082	0	6	0.001	0.291732	8.1885	Up	0.0326238	0.0653074
MLOC_72272.1	Uncharacterized protein	serine threonine protein kinase	1044	0	3	0.001	0.290893	8.18435	Up	0.190372	0.285604
MLOC_67600.1	Uncharacterized protein	wuschel-related homeobox 4	702	0	2	0.001	0.288407	8.17196	Up	0.342736	0.45945
MLOC_24659.1	Uncharacterized protein	retrotransposon line subclass	351	0	1	0.001	0.288407	8.17196	Up	0.617044	0.709706
MLOC_68897.1	Uncharacterized protein	819496 hydrolase-like	351	0	1	0.001	0.288407	8.17196	Up	0.617044	0.705951
AK364457	Hordeum vulgare subsp. vulgare mRNA for predicted protein, complete cds, clone: NIASHv2025G06	sodium-coupled neutral amino acid transporter 4-like	1410	0	4	0.001	0.28718	8.16581	Up	0.105742	0.178949
AK371602	Hordeum vulgare subsp. vulgare mRNA for predicted protein, complete cds, clone: NIASHv2138A16	nad-dependent deacetylase sirtuin-6-like	1410	0	4	0.001	0.28718	8.16581	Up	0.105742	0.178672
AK372219	Hordeum vulgare subsp. vulgare mRNA for predicted protein, complete cds, clone: NIASHv2148D07	anthocyanidin -o-glucosyltransferase-like	1422	0	4	0.001	0.284756	8.15358	Up	0.105742	0.178755
MLOC_70569.1	Uncharacterized protein	hypothetical protein	711	0	2	0.001	0.284756	8.15358	Up	0.342736	0.454981
MLOC_16429.1	Predicted protein (Uncharacterized protein)	transcription factor hec1	714	0	2	0.001	0.28356	8.14751	Up	0.342736	0.454843
MLOC_47957.1	Uncharacterized protein (Fragment)	ribonuclease h protein at1g65750-like	357	0	1	0.001	0.28356	8.14751	Up	0.617044	0.708065
MLOC_65135.1	Uncharacterized protein	laccase family protein	1791	0	5	0.001	0.28261	8.14267	Up	0.0587342	0.108275
MLOC_26410.1	Uncharacterized protein	retrotransposon line subclass	717	0	2	0.001	0.282373	8.14146	Up	0.342736	0.457288
MLOC_55854.1	Uncharacterized protein	protein suppressor of gene silencing 3-like	1797	0	5	0.001	0.281666	8.13784	Up	0.0587342	0.108413
MLOC_68459.1	Uncharacterized protein	retrotransposon unclassified	723	0	2	0.001	0.28003	8.12944	Up	0.342736	0.456507
MLOC_19799.1	Uncharacterized protein	predicted protein	363	0	1	0.001	0.278873	8.12346	Up	0.617044	0.710118
MLOC_76450.1	Uncharacterized protein	1905599 zinc c2h2 type family protein	726	0	2	0.001	0.278873	8.12346	Up	0.342736	0.456146
MLOC_46899.1	Uncharacterized protein (Fragment)	retrotransposon line subclass	363	0	1	0.001	0.278873	8.12346	Up	0.617044	0.702052
MLOC_75421.1	Uncharacterized protein	tpa: protein phosphatase 2c family protein	729	0	2	0.001	0.277725	8.11751	Up	0.342736	0.45559
MLOC_57923.1	Uncharacterized protein	1631449 os12g0228500	366	0	1	0.001	0.276587	8.11159	Up	0.617044	0.709034
AK367574	Hordeum vulgare subsp. vulgare mRNA for predicted protein, complete cds, clone: NIASHv2059A20	caffeic acid o-methyltransferase	1098	0	3	0.001	0.276587	8.11159	Up	0.190372	0.284023
MLOC_33728.1	Uncharacterized protein	retrotransposon line subclass	366	0	1	0.001	0.276587	8.11159	Up	0.617044	0.703408
AK368789	Hordeum vulgare subsp. vulgare mRNA for predicted protein, complete cds, clone: NIASHv2079N08	carnitinyl- dehydratase-like	732	0	2	0.001	0.276587	8.11159	Up	0.342736	0.449651
MLOC_48791.1	Uncharacterized protein	retrotransposon ty3-gypsy subclass	369	0	1	0.001	0.274338	8.09981	Up	0.617044	0.712747
MLOC_6567.3	Uncharacterized protein	cytokinin riboside 5 -monophosphate phosphoribohydrolase log5	741	0	2	0.001	0.273228	8.09396	Up	0.342736	0.458325
MLOC_51238.1	Uncharacterized protein	constans-like protein	741	0	2	0.001	0.273228	8.09396	Up	0.342736	0.456118
MLOC_65905.2	Reticulon-like protein	reticulon-like protein b1-like	741	0	2	0.001	0.273228	8.09396	Up	0.342736	0.455036
MLOC_75808.1	Uncharacterized protein	protein far1-related sequence 5-like	741	0	2	0.001	0.273228	8.09396	Up	0.342736	0.454539
MLOC_65040.1	Uncharacterized protein	aspartic proteinase nepenthesin-1-like	1485	0	4	0.001	0.272676	8.09104	Up	0.105742	0.178561
MLOC_59005.1	Uncharacterized protein	predicted protein	744	0	2	0.001	0.272126	8.08813	Up	0.342736	0.458353
MLOC_9625.1	Uncharacterized protein	retrotransposon ty1-copia subclass	744	0	2	0.001	0.272126	8.08813	Up	0.342736	0.455951
MLOC_62569.1	Uncharacterized protein	1293217 os05g0142100	372	0	1	0.001	0.272126	8.08813	Up	0.617044	0.708587
MLOC_19006.1	Uncharacterized protein	ring-h2 finger protein atl80-like	372	0	1	0.001	0.272126	8.08813	Up	0.617044	0.703665
MLOC_80733.2	Uncharacterized protein	60901 os06g0119900	747	0	2	0.001	0.271033	8.08233	Up	0.342736	0.452669
MLOC_34820.3	Uncharacterized protein	2620750 protein	750	0	2	0.001	0.269949	8.07654	Up	0.342736	0.459902
MLOC_20469.1	Uncharacterized protein (Fragment)	1384559 separase	750	0	2	0.001	0.269949	8.07654	Up	0.342736	0.457233
MLOC_34145.1	Uncharacterized protein (Fragment)	retrotransposon unclassified	375	0	1	0.001	0.269949	8.07654	Up	0.617044	0.704732
MLOC_80344.1	Uncharacterized protein	grf zinc finger family protein	375	0	1	0.001	0.269949	8.07654	Up	0.617044	0.703885
AK250201.1	-	1849246 os04g0166000	3003	0	8	0.001	0.269679	8.0751	Up	0.0100652	0.0229179
MLOC_58298.2	Uncharacterized protein	protein	1515	0	4	0.001	0.267276	8.06219	Up	0.105742	0.178341
AK248236.1	-	ac092388_18 lipase	1143	0	3	0.001	0.265698	8.05364	Up	0.190372	0.284062
MLOC_63348.1	Uncharacterized protein (Fragment)	retrotransposon unclassified	381	0	1	0.001	0.265698	8.05364	Up	0.617044	0.702271
AK369351	Hordeum vulgare subsp. vulgare mRNA for predicted protein, complete cds, clone: NIASHv2089L04	wall-associated receptor kinase 5-like	2289	0	6	0.001	0.26535	8.05175	Up	0.0326238	0.0653314
MLOC_43806.1	Predicted protein (Uncharacterized protein)	myb-related protein myb4-like	765	0	2	0.001	0.264656	8.04797	Up	0.342736	0.455147
MLOC_16847.1	Predicted protein (Uncharacterized protein)	741902 monosaccharide transport protein mst1	1533	0	4	0.001	0.264138	8.04515	Up	0.105742	0.178506
AK360139	Hordeum vulgare subsp. vulgare mRNA for predicted protein, complete cds, clone: NIASHv1111F24	solute carrier family 35 member f1-like	1158	0	3	0.001	0.262256	8.03483	Up	0.190372	0.284159
MLOC_30458.1	Uncharacterized protein	reverse transcriptase	387	0	1	0.001	0.261578	8.0311	Up	0.617044	0.712898
MLOC_7423.1	Uncharacterized protein (Fragment)	ribonuclease h protein at1g65750-like	387	0	1	0.001	0.261578	8.0311	Up	0.617044	0.710342
MLOC_25414.1	Uncharacterized protein (Fragment)	reverse transcriptase	387	0	1	0.001	0.261578	8.0311	Up	0.617044	0.707359
MLOC_60695.1	Uncharacterized protein	calmodulin binding protein	387	0	1	0.001	0.261578	8.0311	Up	0.617044	0.704437
MLOC_27794.1	Uncharacterized protein	retrotransposon line subclass	390	0	1	0.001	0.259566	8.01996	Up	0.617044	0.713351
MLOC_48640.1	Uncharacterized protein	receptor-like protein kinase feronia-like	390	0	1	0.001	0.259566	8.01996	Up	0.617044	0.708549
MLOC_44167.1	Uncharacterized protein	protein odorant1-like	780	0	2	0.001	0.259566	8.01996	Up	0.342736	0.453602
MLOC_53662.1	Uncharacterized protein	oxidoreductase transition metal ion binding protein	390	0	1	0.001	0.259566	8.01996	Up	0.617044	0.703151
MLOC_73438.1	Uncharacterized protein	f-box protein at3g44060-like	1566	0	4	0.001	0.258572	8.01442	Up	0.105742	0.178107
MLOC_12930.1	Uncharacterized protein	1076723 tpa: duf604-domain containing glycosyltransferase-related family protein	1569	0	4	0.001	0.258077	8.01166	Up	0.105742	0.178121
AK356936	Hordeum vulgare subsp. vulgare mRNA for predicted protein, complete cds, clone: NIASHv1042H07	alpha-expansin expa1	786	0	2	0.001	0.257585	8.0089	Up	0.342736	0.455313
MLOC_14178.1	Uncharacterized protein	1148666 outward-rectifying potassium channel	786	0	2	0.001	0.257585	8.0089	Up	0.342736	0.45385
AK367215	Hordeum vulgare subsp. vulgare mRNA for predicted protein, complete cds, clone: NIASHv2052P21	auxin-induced protein 5ng4-like	1185	0	3	0.001	0.256281	8.00158	Up	0.190372	0.285017
MLOC_7936.1	Uncharacterized protein	chalcone synthase	1185	0	3	0.001	0.256281	8.00158	Up	0.190372	0.284315
MLOC_1855.2	Uncharacterized protein	retrotransposon unclassified	792	0	2	0.001	0.255633	7.99793	Up	0.342736	0.456591
MLOC_73482.1	Uncharacterized protein	powdery mildew resistance protein pm3 variant	3960	0	10	0.001	0.255633	7.99793	Up	0.00310532	0.0079849
AK373876	Hordeum vulgare subsp. vulgare mRNA for predicted protein, complete cds, clone: NIASHv3046C08	2611193 protein	792	0	2	0.001	0.255633	7.99793	Up	0.342736	0.454015
MLOC_8624.1	Uncharacterized protein (Fragment)	34500 os06g0660400	396	0	1	0.001	0.255633	7.99793	Up	0.617044	0.70621
MLOC_68601.1	Uncharacterized protein	subtilisin-like protease precursor	2391	0	6	0.001	0.25403	7.98885	Up	0.0326238	0.0653853
MLOC_60855.1	Uncharacterized protein	58989 os06g0320300	399	0	1	0.001	0.253711	7.98704	Up	0.617044	0.701284
AK361436	Hordeum vulgare subsp. vulgare mRNA for predicted protein, complete cds, clone: NIASHv1140H24	2605106 protein	1602	0	4	0.001	0.252761	7.98163	Up	0.105742	0.178741
AK355919	Hordeum vulgare subsp. vulgare mRNA for predicted protein, complete cds, clone: NIASHv1027N18	pleiotropic drug resistance protein 4-like	2409	0	6	0.001	0.252132	7.97803	Up	0.0326238	0.0654875
MLOC_54935.1	Uncharacterized protein	lactosylceramide 4-alpha-	402	0	1	0.001	0.251818	7.97624	Up	0.617044	0.709856
MLOC_68163.1	Uncharacterized protein	59168 os01g0153500	804	0	2	0.001	0.251818	7.97624	Up	0.342736	0.452505
MLOC_74281.1	Uncharacterized protein (Fragment)	1635689 os07g0649700	807	0	2	0.001	0.250882	7.97086	Up	0.342736	0.452177
MLOC_7086.1	Uncharacterized protein	cytochrome c oxidoreductase	807	0	2	0.001	0.250882	7.97086	Up	0.342736	0.45125
MLOC_27831.1	Uncharacterized protein (Fragment)	retrotransposon line subclass	405	0	1	0.001	0.249953	7.96551	Up	0.617044	0.7084
MLOC_31099.1	Uncharacterized protein	af466646_7 polyprotein	405	0	1	0.001	0.249953	7.96551	Up	0.617044	0.703297
MLOC_76497.3	Uncharacterized protein	59224 os01g0144300	408	0	1	0.001	0.248115	7.95486	Up	0.617044	0.706506
MLOC_75638.1	Uncharacterized protein (Fragment)	probable lysine-specific demethylase jmj14-like	2043	0	5	0.001	0.247751	7.95274	Up	0.0587342	0.108166
AK364013	Hordeum vulgare subsp. vulgare mRNA for predicted protein, complete cds, clone: NIASHv2020N12	carbonic anhydrase	819	0	2	0.001	0.247206	7.94957	Up	0.342736	0.456201
MLOC_72057.1	Uncharacterized protein	ribonuclease h protein at1g65750-like	411	0	1	0.001	0.246304	7.94429	Up	0.617044	0.702857
MLOC_16598.1	Uncharacterized protein	myb dna-binding domain superfamily protein	822	0	2	0.001	0.246304	7.94429	Up	0.342736	0.449435
MLOC_68718.1	Uncharacterized protein	2664493 cytochrome p450	1647	0	4	0.001	0.245855	7.94166	Up	0.105742	0.177655
MLOC_64508.1	Predicted protein (Uncharacterized protein)	protein	1236	0	3	0.001	0.245706	7.94079	Up	0.190372	0.28533
MLOC_31956.1	Uncharacterized protein (Fragment)	1738515 retrotransposon expressed	828	0	2	0.001	0.244519	7.9338	Up	0.342736	0.450625
AK366356	Hordeum vulgare subsp. vulgare mRNA for predicted protein, complete cds, clone: NIASHv2042C24	1850660 os08g0197500	1662	0	4	0.001	0.243636	7.92858	Up	0.105742	0.178796
MLOC_25747.1	Uncharacterized protein	retrotransposon unclassified	831	0	2	0.001	0.243636	7.92858	Up	0.342736	0.455175
MLOC_53818.1	Predicted protein (Uncharacterized protein)	915257 got1 sft2-like vescicle transport protein	420	0	1	0.001	0.241026	7.91304	Up	0.617044	0.707842
MLOC_44183.2	Uncharacterized protein	protein zinc induced facilitator-like 1-like	1263	0	3	0.001	0.240453	7.90961	Up	0.190372	0.283617
MLOC_38421.4	Uncharacterized protein	chorismate mutase	849	0	2	0.001	0.238471	7.89767	Up	0.342736	0.45648
MLOC_57723.1	Uncharacterized protein	predicted protein	426	0	1	0.001	0.237631	7.89258	Up	0.617044	0.713238
MLOC_60187.1	Uncharacterized protein	protein disulfide-isomerase a1	864	0	2	0.001	0.234331	7.8724	Up	0.342736	0.459309
MLOC_55677.1	Uncharacterized protein		864	0	2	0.001	0.234331	7.8724	Up	0.342736	0.457512
MLOC_10045.1	Uncharacterized protein	2896676 protein	867	0	2	0.001	0.23352	7.8674	Up	0.342736	0.451877
MLOC_49351.1	Uncharacterized protein (Fragment)	retrotransposon unclassified	435	0	1	0.001	0.232715	7.86242	Up	0.617044	0.710492
AK353912	Hordeum vulgare subsp. vulgare mRNA for predicted protein, complete cds, clone: NIASHv1003L04	peptide transporter ptr2-like	1743	0	4	0.001	0.232314	7.85993	Up	0.105742	0.177504
MLOC_21788.1	Uncharacterized protein	retrotransposon unclassified	438	0	1	0.001	0.231121	7.8525	Up	0.617044	0.701796
MLOC_38237.1	Uncharacterized protein	f-box protein at4g10400-like	879	0	2	0.001	0.230332	7.84757	Up	0.342736	0.450137
MLOC_11071.1	Uncharacterized protein	protein mks1-like	441	0	1	0.001	0.229548	7.84265	Up	0.617044	0.712634
MLOC_43923.3	Uncharacterized protein	far-red impaired response	1329	0	3	0.001	0.228512	7.83613	Up	0.190372	0.285036
MLOC_78551.1	Uncharacterized protein	ring-h2 finger protein atl3-like	444	0	1	0.001	0.227997	7.83287	Up	0.617044	0.705544
AK361699	Hordeum vulgare subsp. vulgare mRNA for predicted protein, complete cds, clone: NIASHv1146L23	933067 rp1-like protein	891	0	2	0.001	0.22723	7.82801	Up	0.342736	0.454622
MLOC_60568.1	Uncharacterized protein	organelle transcript processing partial	1782	0	4	0.001	0.22723	7.82801	Up	0.105742	0.177682
MLOC_58936.1	Uncharacterized protein	pentatricopeptide repeat-containing protein at4g15720-like	1785	0	4	0.001	0.226848	7.82558	Up	0.105742	0.178893
MLOC_18537.1	Uncharacterized protein	copper chaperone for superoxide dismutase-like	450	0	1	0.001	0.224957	7.81351	Up	0.617044	0.704106
MLOC_69163.1	Predicted protein (Uncharacterized protein)	6455 protein	900	0	2	0.001	0.224957	7.81351	Up	0.342736	0.451087
MLOC_11303.1	Uncharacterized protein	tpa: duf26-domain receptor-like protein kinase family protein	450	0	1	0.001	0.224957	7.81351	Up	0.617044	0.701722
AK375282	Hordeum vulgare subsp. vulgare mRNA for predicted protein, complete cds, clone: NIASHv3089M07	gdsl esterase lipase at5g45950-like	1353	0	3	0.001	0.224459	7.81031	Up	0.190372	0.285663
MLOC_17883.1	Predicted protein (Uncharacterized protein)	1851471 partial	903	0	2	0.001	0.22421	7.80871	Up	0.342736	0.459761
MLOC_76929.1	Uncharacterized protein	duf231 domain containing family protein	903	0	2	0.001	0.22421	7.80871	Up	0.342736	0.453932
MLOC_30287.1	Uncharacterized protein	1635279 os07g0115700	453	0	1	0.001	0.223468	7.80392	Up	0.617044	0.71038
AK360496	Hordeum vulgare subsp. vulgare mRNA for predicted protein, complete cds, clone: NIASHv1119F09	disease resistance protein rpm1-like	2271	0	5	0.001	0.222877	7.80011	Up	0.0587342	0.108184
MLOC_55870.1	Predicted protein (Uncharacterized protein)	transcription factor bhlh70-like	909	0	2	0.001	0.22273	7.79915	Up	0.342736	0.457261
MLOC_25675.1	Uncharacterized protein	transposable element	456	0	1	0.001	0.221997	7.7944	Up	0.617044	0.705803
MLOC_26351.1	Uncharacterized protein	1635279 os07g0115700	459	0	1	0.001	0.220547	7.78494	Up	0.617044	0.703996
MLOC_74834.1	Uncharacterized protein	beta-expansin 1a precursor	918	0	2	0.001	0.220547	7.78494	Up	0.342736	0.450544
MLOC_4361.1	Uncharacterized protein	nicotianamine aminotransferase	1377	0	3	0.001	0.220547	7.78494	Up	0.190372	0.283597
AK356959	Hordeum vulgare subsp. vulgare mRNA for predicted protein, complete cds, clone: NIASHv1042P14	carbohydrate-binding x8 domain-containing protein	1380	0	3	0.001	0.220067	7.7818	Up	0.190372	0.28488
AK359410	Hordeum vulgare subsp. vulgare mRNA for predicted protein, complete cds, clone: NIASHv1096E11	protein transparent testa 1-like	921	0	2	0.001	0.219828	7.78023	Up	0.342736	0.456007
MLOC_6928.1	Uncharacterized protein	pentatricopeptide repeat-containing protein at5g06540-like	921	0	2	0.001	0.219828	7.78023	Up	0.342736	0.451332
AK249843.1	-	uncharacterized mscs family protein at1g78610-like	2307	0	5	0.001	0.219399	7.77742	Up	0.0587342	0.108248
MLOC_34607.7	Uncharacterized protein	pentatricopeptide repeat-containing protein mitochondrial-like	1848	0	4	0.001	0.219114	7.77554	Up	0.105742	0.178589
MLOC_49974.1	Uncharacterized protein	-1 protein	924	0	2	0.001	0.219114	7.77554	Up	0.342736	0.453685
MLOC_64811.1	Uncharacterized protein	leucine-rich repeat receptor-like kinase	3252	0	7	0.001	0.217902	7.76753	Up	0.0181208	0.0387358
MLOC_21782.1	Uncharacterized protein	dna binding	465	0	1	0.001	0.217701	7.7662	Up	0.617044	0.711505
MLOC_8109.1	Uncharacterized protein	1111270 os05g0102200	1860	0	4	0.001	0.217701	7.7662	Up	0.105742	0.177928
MLOC_6548.1	Uncharacterized protein	2549026 zinc finger protein 1	465	0	1	0.001	0.217701	7.7662	Up	0.617044	0.703481
MLOC_57596.1	Uncharacterized protein	2770578 os07g0421000	1404	0	3	0.001	0.216305	7.75692	Up	0.190372	0.28582
MLOC_65226.3	Peroxidase (EC 1.11.1.7)	root peroxidase	936	0	2	0.001	0.216305	7.75692	Up	0.342736	0.453575
MLOC_70020.2	Uncharacterized protein	2607436 protein	936	0	2	0.001	0.216305	7.75692	Up	0.342736	0.452478
MLOC_79176.1	Peroxidase (EC 1.11.1.7)	760810 peroxidase	939	0	2	0.001	0.215614	7.75231	Up	0.342736	0.451413
MLOC_59564.1	Uncharacterized protein	chitinase 2-like	939	0	2	0.001	0.215614	7.75231	Up	0.342736	0.450354
MLOC_75631.2	Uncharacterized protein	PREDICTED: uncharacterized protein LOC100840175	471	0	1	0.001	0.214928	7.74771	Up	0.617044	0.703261
MLOC_28603.2	Uncharacterized protein	1850826 os08g0104800	942	0	2	0.001	0.214928	7.74771	Up	0.342736	0.450191
MLOC_52457.1	Uncharacterized protein	pentatricopeptide repeat-containing protein	945	0	2	0.001	0.214245	7.74312	Up	0.342736	0.454318
MLOC_44668.1	Predicted protein (Uncharacterized protein)	2891326 os02g0198800	945	0	2	0.001	0.214245	7.74312	Up	0.342736	0.453492
MLOC_26596.1	Uncharacterized protein (Fragment)	hypothetical protein ZEAMMB73_228110	474	0	1	0.001	0.213567	7.73855	Up	0.617044	0.701357
AK373791	Hordeum vulgare subsp. vulgare mRNA for predicted protein, complete cds, clone: NIASHv3043M09	integrin-linked protein kinase-like protein	1428	0	3	0.001	0.21267	7.73247	Up	0.190372	0.285683
MLOC_59807.1	Uncharacterized protein	1306848 os05g0468400	1431	0	3	0.001	0.212224	7.72944	Up	0.190372	0.285859
MLOC_28804.1	Uncharacterized protein	retrotransposon unclassified	477	0	1	0.001	0.212224	7.72944	Up	0.617044	0.703114
MLOC_77608.1	Uncharacterized protein (Fragment)	abc transporter g family member 16-like	1437	0	3	0.001	0.211338	7.72341	Up	0.190372	0.284276
AK372083	Hordeum vulgare subsp. vulgare mRNA for predicted protein, complete cds, clone: NIASHv2146E09	u-box domain-containing protein 6-like	2409	0	5	0.001	0.21011	7.715	Up	0.0587342	0.10823
AK361150	Hordeum vulgare subsp. vulgare mRNA for predicted protein, complete cds, clone: NIASHv1133L18	peroxidase 70-like	966	0	2	0.001	0.209588	7.71141	Up	0.342736	0.459845
MLOC_77219.1	Uncharacterized protein (Fragment)	ribonuclease h protein at1g65750-like	483	0	1	0.001	0.209588	7.71141	Up	0.617044	0.704511
MLOC_63679.1	Serine/threonine-protein kinase (EC 2.7.11.1)	receptor protein kinase 1-like	2418	0	5	0.001	0.209328	7.70962	Up	0.0587342	0.108284
AK364448	Hordeum vulgare subsp. vulgare mRNA for predicted protein, complete cds, clone: NIASHv2025E12	j-domain protein required for chloroplast accumulation response 1	1935	0	4	0.001	0.209263	7.70917	Up	0.105742	0.178396
MLOC_4124.2	Uncharacterized protein	serine esterase family protein	969	0	2	0.001	0.208939	7.70694	Up	0.342736	0.453273
AK367037	Hordeum vulgare subsp. vulgare mRNA for predicted protein, complete cds, clone: NIASHv2050F21	934458 at5g10750	972	0	2	0.001	0.208294	7.70248	Up	0.342736	0.454788
MLOC_20673.1	Uncharacterized protein	transposon mutator sub-class	486	0	1	0.001	0.208294	7.70248	Up	0.617044	0.70429
MLOC_80753.1	Uncharacterized protein	arm repeat-containing protein containing family protein	1950	0	4	0.001	0.207653	7.69803	Up	0.105742	0.178176
MLOC_50256.1	Uncharacterized protein (Fragment)	2799890 zinc knuckle domain containing	489	0	1	0.001	0.207016	7.6936	Up	0.617044	0.706691
MLOC_65644.1	Uncharacterized protein	transmembrane 9 superfamily member 4-like	978	0	2	0.001	0.207016	7.6936	Up	0.342736	0.452834
MLOC_81102.1	Uncharacterized protein	b3 domain-containing protein os03g0619600-like	981	0	2	0.001	0.206383	7.68918	Up	0.342736	0.45374
AK354591	Hordeum vulgare subsp. vulgare mRNA for predicted protein, complete cds, clone: NIASHv1008N03	retrotransposon unclassified	492	0	1	0.001	0.205754	7.68478	Up	0.617044	0.712144
MLOC_51370.1	Uncharacterized protein	zinc c3hc4 type family protein	492	0	1	0.001	0.205754	7.68478	Up	0.617044	0.710642
MLOC_7444.1	Uncharacterized protein	hat family dimerisation domain containing expressed	492	0	1	0.001	0.205754	7.68478	Up	0.617044	0.708959
MLOC_62331.1	Peroxidase (EC 1.11.1.7)	peroxidase n-like	984	0	2	0.001	0.205754	7.68478	Up	0.342736	0.450083
AK376011	Hordeum vulgare subsp. vulgare mRNA for predicted protein, complete cds, clone: NIASHv3112F17	telomere-binding protein 1-like	1974	0	4	0.001	0.205128	7.68038	Up	0.105742	0.178286
MLOC_63790.1	Serine/threonine-protein kinase (EC 2.7.11.1)	g-type lectin s-receptor-like serine threonine-protein kinase at2g19130-like	2472	0	5	0.001	0.204755	7.67775	Up	0.0587342	0.108303
AK358796	Hordeum vulgare subsp. vulgare mRNA for predicted protein, complete cds, clone: NIASHv1083G20	epoxide hydrolase 2-like	990	0	2	0.001	0.204507	7.676	Up	0.342736	0.458746
MLOC_5864.1	Uncharacterized protein	polygalacturonase inhibitor 1 precursor	990	0	2	0.001	0.204507	7.676	Up	0.342736	0.45824
MLOC_56271.1	E3 ubiquitin-protein ligase (EC 6.3.2.-)	754956 os01g0122200	990	0	2	0.001	0.204507	7.676	Up	0.342736	0.457428
MLOC_79484.1	Uncharacterized protein	retrotransposon ty1-copia subclass	990	0	2	0.001	0.204507	7.676	Up	0.342736	0.449786
MLOC_64199.3	Uncharacterized protein	btb poz domain-containing protein at1g03010-like	1983	0	4	0.001	0.204197	7.67382	Up	0.105742	0.178355
AK249071.1	-	udp-glycosyltransferase transferring glycosyl groups	1488	0	3	0.001	0.204094	7.67309	Up	0.190372	0.284782
AK367975	Hordeum vulgare subsp. vulgare mRNA for predicted protein, complete cds, clone: NIASHv2065M04	-bisphosphoglycerate-dependent phosphoglycerate mutase-like	999	0	2	0.001	0.202664	7.66295	Up	0.342736	0.459817
MLOC_48449.1	Uncharacterized protein	reverse transcriptase	501	0	1	0.001	0.202058	7.65862	Up	0.617044	0.708847
MLOC_56291.1	Uncharacterized protein	retrotransposon unclassified	501	0	1	0.001	0.202058	7.65862	Up	0.617044	0.708028
AK375503	Hordeum vulgare subsp. vulgare mRNA for predicted protein, complete cds, clone: NIASHv3096D08	pollen-specific protein c13 precursor	501	0	1	0.001	0.202058	7.65862	Up	0.617044	0.706765
MLOC_11775.1	Uncharacterized protein	ent-copalyl diphosphate synthase	1506	0	3	0.001	0.201655	7.65575	Up	0.190372	0.284198
AK363244	Hordeum vulgare subsp. vulgare mRNA for predicted protein, complete cds, clone: NIASHv2013L05	nas2_horvu ame: full=probable nicotianamine synthase 2 ame: full= 2 ame: full=s-adenosyl-l-methionine:s-adenosyl-l-methionine:s-adenosyl-methionine 3-amino-3-carboxypropyltransferase 2	1005	0	2	0.001	0.201454	7.65431	Up	0.342736	0.449948
MLOC_60903.2	Uncharacterized protein	retrotransposon unclassified	504	0	1	0.001	0.200855	7.65001	Up	0.617044	0.713767
MLOC_37768.2	Uncharacterized protein	b3 domain-containing protein os03g0619600-like	1512	0	3	0.001	0.200855	7.65001	Up	0.190372	0.285232
MLOC_79756.1	Predicted protein (Uncharacterized protein)	beta-glucosidase 28-like	1515	0	3	0.001	0.200457	7.64715	Up	0.190372	0.284978
MLOC_3743.1	Peroxidase (EC 1.11.1.7)	1096336 class iii peroxidase	1011	0	2	0.001	0.200259	7.64572	Up	0.342736	0.457205
MLOC_53156.1	Uncharacterized protein	hydrolase domain-containing protein	1011	0	2	0.001	0.200259	7.64572	Up	0.342736	0.450056
AK363630	Hordeum vulgare subsp. vulgare mRNA for predicted protein, complete cds, clone: NIASHv2017H19	calcium-dependent protein kinase	1518	0	3	0.001	0.200061	7.6443	Up	0.190372	0.2858
AK354780	Hordeum vulgare subsp. vulgare mRNA for predicted protein, complete cds, clone: NIASHv1011B16	catalytic coenzyme binding protein	1521	0	3	0.001	0.199666	7.64145	Up	0.190372	0.284938
MLOC_79740.2	Uncharacterized protein	probable atp-dependent dna helicase hfm1-like	510	0	1	0.001	0.198492	7.63294	Up	0.617044	0.706395
MLOC_80759.1	Uncharacterized protein	1150867 os03g0672400	510	0	1	0.001	0.198492	7.63294	Up	0.617044	0.706321
MLOC_56136.1	Uncharacterized protein	1070914 os05g0112750	513	0	1	0.001	0.197331	7.62447	Up	0.617044	0.710567
AK248525.1	-	sulfotransferase 17-like	1029	0	2	0.001	0.196756	7.62026	Up	0.342736	0.4533
MLOC_12720.2	Uncharacterized protein	disease resistance protein rga4-like	1551	0	3	0.001	0.195804	7.61327	Up	0.190372	0.283752
MLOC_10766.1	Uncharacterized protein	defensin precursor	249	1	244	0.507966	99.1981	7.60944	Up	6.02e-61	1.75e-59
MLOC_62248.1	Uncharacterized protein	50108 copper-binding	519	0	1	0.001	0.19505	7.6077	Up	0.617044	0.707656
MLOC_61121.1	Uncharacterized protein	cytochrome p450	1572	0	3	0.001	0.193189	7.59387	Up	0.190372	0.285114
AK248688.1	-	lon protease homolog peroxisomal-like	2103	0	4	0.001	0.192546	7.58906	Up	0.105742	0.177668
AK374392	Hordeum vulgare subsp. vulgare mRNA for predicted protein, complete cds, clone: NIASHv3063I23	elongation factor 3	3168	0	6	0.001	0.191725	7.5829	Up	0.0326238	0.0653793
MLOC_70647.1	Uncharacterized protein	ring zinc finger domain superfamily protein	528	0	1	0.001	0.191725	7.5829	Up	0.617044	0.704401
MLOC_77701.1	Uncharacterized protein	386288 glucan -beta-glucosidase precursor	1059	0	2	0.001	0.191182	7.5788	Up	0.342736	0.456062
MLOC_5847.1	Uncharacterized protein	gdsl esterase lipase at2g42990-like	1059	0	2	0.001	0.191182	7.5788	Up	0.342736	0.455396
MLOC_10895.2	Uncharacterized protein	hypothetical protein ZEAMMB73_258280	531	0	1	0.001	0.190642	7.57472	Up	0.617044	0.702784
AK374299	Hordeum vulgare subsp. vulgare mRNA for predicted protein, complete cds, clone: NIASHv3059O15	60990 os06g0136100	1065	0	2	0.001	0.190105	7.57065	Up	0.342736	0.455258
MLOC_31460.1	Uncharacterized protein	1636975 os11g0160000	534	0	1	0.001	0.189571	7.56659	Up	0.617044	0.709482
MLOC_26652.1	Uncharacterized protein		534	0	1	0.001	0.189571	7.56659	Up	0.617044	0.707062
AK249695.1	-	361314 mannitol expressed	1068	0	2	0.001	0.189571	7.56659	Up	0.342736	0.453327
MLOC_26396.1	Uncharacterized protein	reverse transcriptase	537	0	1	0.001	0.188512	7.55851	Up	0.617044	0.71053
MLOC_41241.1	Uncharacterized protein	af466646_7 polyprotein	537	0	1	0.001	0.188512	7.55851	Up	0.617044	0.706728
AK369350	Hordeum vulgare subsp. vulgare mRNA for predicted protein, complete cds, clone: NIASHv2089K17	nbs-lrr type protein	3288	1	235	0.0384682	7.23517	7.55522	Up	1.15e-58	3.25e-57
MLOC_63937.1	Uncharacterized protein	nodulin protein	1080	0	2	0.001	0.187465	7.55047	Up	0.342736	0.456786
AK369563	Hordeum vulgare subsp. vulgare mRNA for predicted protein, partial cds, clone: NIASHv2093H05	metallophosphoesterase 1	1083	0	2	0.001	0.186945	7.54647	Up	0.342736	0.449921
MLOC_54434.1	Uncharacterized protein	zinc finger protein 2-like	543	0	1	0.001	0.186429	7.54248	Up	0.617044	0.711768
MLOC_74318.1	Uncharacterized protein (Fragment)	retrotransposon unclassified	543	0	1	0.001	0.186429	7.54248	Up	0.617044	0.711167
MLOC_9315.2	Uncharacterized protein	transposon mutator sub- expressed	543	0	1	0.001	0.186429	7.54248	Up	0.617044	0.705064
MLOC_68406.1	Uncharacterized protein	2532325 os05g0140333	1089	0	2	0.001	0.185915	7.5385	Up	0.342736	0.459987
MLOC_28815.1	Uncharacterized protein	hypothetical protein SORBIDRAFT_05g001992	546	0	1	0.001	0.185404	7.53453	Up	0.617044	0.704622
AK376677	Hordeum vulgare subsp. vulgare mRNA for predicted protein, complete cds, clone: NIASHv3131F12	17210 transcription activator rf2a-like	1095	0	2	0.001	0.184897	7.53057	Up	0.342736	0.457876
MLOC_67886.1	Uncharacterized protein	819058 protein	1095	0	2	0.001	0.184897	7.53057	Up	0.342736	0.45687
MLOC_68749.1	Predicted protein (Uncharacterized protein)	1631805 os02g0191600	552	0	1	0.001	0.183389	7.51877	Up	0.617044	0.71286
MLOC_58512.2	Predicted protein (Uncharacterized protein)	probable lrr receptor-like serine threonine-protein kinase at1g56140-like	1104	0	2	0.001	0.183389	7.51877	Up	0.342736	0.458577
MLOC_72029.1	Uncharacterized protein	759831 os08g0163600	555	0	1	0.001	0.182398	7.51095	Up	0.617044	0.711468
MLOC_10743.1	Uncharacterized protein	low quality protein: salicylate o-methyltransferase-like	1110	0	2	0.001	0.182398	7.51095	Up	0.342736	0.450978
AK369964	Hordeum vulgare subsp. vulgare mRNA for predicted protein, complete cds, clone: NIASHv2102E02	gdsl esterase lipase at5g55050-like	1116	0	2	0.001	0.181417	7.50317	Up	0.342736	0.450815
MLOC_13649.1	Uncharacterized protein	cytochrome p450 734a1-like	1119	0	2	0.001	0.180931	7.4993	Up	0.342736	0.459084
MLOC_75024.4	Uncharacterized protein	serine carboxypeptidase ii-3-like	1119	0	2	0.001	0.180931	7.4993	Up	0.342736	0.45256
AK361387	Hordeum vulgare subsp. vulgare mRNA for predicted protein, complete cds, clone: NIASHv1139H12	1595113 bhlh domain protein	1683	0	3	0.001	0.180447	7.49543	Up	0.190372	0.284802
MLOC_4018.1	Uncharacterized protein	pentatricopeptide repeat-containing protein	2247	0	4	0.001	0.180206	7.49351	Up	0.105742	0.178838
AK375434	Hordeum vulgare subsp. vulgare mRNA for predicted protein, complete cds, clone: NIASHv3094D16	primary amine oxidase-like	1131	0	2	0.001	0.179011	7.48391	Up	0.342736	0.45319
MLOC_39222.1	Uncharacterized protein	protein hothead-like	1698	0	3	0.001	0.178853	7.48263	Up	0.190372	0.284646
MLOC_11341.2	Uncharacterized protein	two-component response regulator arr12-like	1701	0	3	0.001	0.178538	7.48008	Up	0.190372	0.285545
MLOC_39957.1	Predicted protein (Uncharacterized protein)	pectin methyl esterase inhibitor	573	0	1	0.001	0.176668	7.4649	Up	0.617044	0.71222
AK357490	Hordeum vulgare subsp. vulgare mRNA for predicted protein, complete cds, clone: NIASHv1054J18	atp-dependent zinc metalloprotease -like	1725	0	3	0.001	0.176054	7.45987	Up	0.190372	0.284704
MLOC_7931.1	Uncharacterized protein	hat family dimerisation domain containing protein	576	0	1	0.001	0.175748	7.45736	Up	0.617044	0.70937
MLOC_69796.1	Uncharacterized protein	ring zinc finger domain superfamily protein	576	0	1	0.001	0.175748	7.45736	Up	0.617044	0.70773
MLOC_13032.1	Uncharacterized protein	squamosa promoter-binding-like protein 4	576	0	1	0.001	0.175748	7.45736	Up	0.617044	0.705212
MLOC_72439.1	Uncharacterized protein	f-box domain containing expressed	1152	0	2	0.001	0.175748	7.45736	Up	0.342736	0.449732
AK372630	Hordeum vulgare subsp. vulgare mRNA for predicted protein, complete cds, clone: NIASHv3007K16	1632507 os01g0244000	1155	0	2	0.001	0.175292	7.45361	Up	0.342736	0.451604
AK360007	Hordeum vulgare subsp. vulgare mRNA for predicted protein, complete cds, clone: NIASHv1108F12	1635128 os06g0612950	579	0	1	0.001	0.174837	7.44987	Up	0.617044	0.711205
MLOC_39134.1	Uncharacterized protein	pyrophosphate-energized vacuolar membrane proton pump-like	2325	0	4	0.001	0.174161	7.44427	Up	0.105742	0.177737
AK248322.1	-	two-component response regulator arr12-like	1164	0	2	0.001	0.173936	7.44241	Up	0.342736	0.458381
MLOC_38597.1	Uncharacterized protein	auxin-induced protein 5ng4-like	1164	0	2	0.001	0.173936	7.44241	Up	0.342736	0.449408
AK360448	Hordeum vulgare subsp. vulgare mRNA for predicted protein, complete cds, clone: NIASHv1118G08	receptor-like kinase	1164	0	2	0.001	0.173936	7.44241	Up	0.342736	0.449354
MLOC_26960.1	Uncharacterized protein (Fragment)	reverse transcriptase	585	0	1	0.001	0.173044	7.435	Up	0.617044	0.707693
AK364585	Hordeum vulgare subsp. vulgare mRNA for predicted protein, complete cds, clone: NIASHv2026L14	gdsl esterase lipase at1g28600-like	1173	0	2	0.001	0.172602	7.4313	Up	0.342736	0.455479
AK362965	Hordeum vulgare subsp. vulgare mRNA for predicted protein, complete cds, clone: NIASHv2011M03	dna-binding protein smubp-2-like	2358	0	4	0.001	0.171723	7.42394	Up	0.105742	0.178907
AK367990	Hordeum vulgare subsp. vulgare mRNA for predicted protein, complete cds, clone: NIASHv2065P10	dj-1 family protein	1179	0	2	0.001	0.171723	7.42394	Up	0.342736	0.456257
MLOC_56648.1	Uncharacterized protein	homeobox dna-binding and leucine zipper domain family protein	594	0	1	0.001	0.170422	7.41297	Up	0.617044	0.701248
MLOC_76542.1	Uncharacterized protein	disease resistance protein rpm1-like	1785	0	3	0.001	0.170136	7.41054	Up	0.190372	0.285369
AK248352.1	-	protein kinase superfamily protein	603	0	1	0.001	0.167879	7.39128	Up	0.617044	0.702564
AK362465	Hordeum vulgare subsp. vulgare mRNA for predicted protein, partial cds, clone: NIASHv2005K20	curcuminoid synthase-like	1209	0	2	0.001	0.167462	7.38769	Up	0.342736	0.451114
MLOC_80155.1	Uncharacterized protein	1636975 os11g0160000	606	0	1	0.001	0.167048	7.38412	Up	0.617044	0.711618
MLOC_41634.1	Uncharacterized protein	37 protein	606	0	1	0.001	0.167048	7.38412	Up	0.617044	0.711317
MLOC_57126.1	Uncharacterized protein	1112142 at4g12080 f16j13_150	606	0	1	0.001	0.167048	7.38412	Up	0.617044	0.710792
MLOC_70239.1	Predicted protein (Uncharacterized protein)	1177103 os04g0455700	606	0	1	0.001	0.167048	7.38412	Up	0.617044	0.709781
MLOC_16631.1	Uncharacterized protein	300138 os10g0560000	1212	0	2	0.001	0.167048	7.38412	Up	0.342736	0.451931
AK251692.1	-	filament-like plant protein 3-like	2427	0	4	0.001	0.166841	7.38233	Up	0.105742	0.178963
MLOC_6930.1	Uncharacterized protein	two-component response regulator arr12-like	1215	0	2	0.001	0.166635	7.38055	Up	0.342736	0.457177
AK355455	Hordeum vulgare subsp. vulgare mRNA for predicted protein, complete cds, clone: NIASHv1020N05	1014530 bhlh transcription factor-like	1215	0	2	0.001	0.166635	7.38055	Up	0.342736	0.450571
MLOC_74627.1	Uncharacterized protein	1874537 protein	1218	0	2	0.001	0.166225	7.37699	Up	0.342736	0.459958
MLOC_58508.9	Uncharacterized protein	tpa: saur40-auxin-responsive saur family member	609	0	1	0.001	0.166225	7.37699	Up	0.617044	0.707545
MLOC_5752.2	Uncharacterized protein	1632785 ame: full=phospholipase a1-ii 2	1218	0	2	0.001	0.166225	7.37699	Up	0.342736	0.450598
MLOC_16927.2	Uncharacterized protein	transposon mutator sub-class	612	0	1	0.001	0.16541	7.3699	Up	0.617044	0.713162
MLOC_7255.1	Uncharacterized protein	ap2 erf domain-containing transcription factor	1224	0	2	0.001	0.16541	7.3699	Up	0.342736	0.449246
MLOC_57932.1	Uncharacterized protein	2245810 protein z	1227	0	2	0.001	0.165005	7.36637	Up	0.342736	0.45341
MLOC_60135.1	Uncharacterized protein	bzip transcription factor	615	0	1	0.001	0.164603	7.36285	Up	0.617044	0.706988
MLOC_78637.2	Uncharacterized protein	retrotransposon unclassified	1233	0	2	0.001	0.164203	7.35933	Up	0.342736	0.450734
MLOC_38617.1	Uncharacterized protein	2086 protein	618	0	1	0.001	0.163804	7.35583	Up	0.617044	0.708997
MLOC_65591.1	Predicted protein (Uncharacterized protein)	1375857 pyrabactin resistance 1-like 5	618	0	1	0.001	0.163804	7.35583	Up	0.617044	0.707507
AK363050	Hordeum vulgare subsp. vulgare mRNA for predicted protein, complete cds, clone: NIASHv2012G08	arogenate dehydratase prephenate dehydratase chloroplastic-like	1242	0	2	0.001	0.163013	7.34884	Up	0.342736	0.457652
MLOC_5837.1	Uncharacterized protein	49808 transfactor	1245	0	2	0.001	0.16262	7.34536	Up	0.342736	0.45673
MLOC_56106.1	Uncharacterized protein	probable phosphatidylinositol 4-kinase type 2-beta at1g26270-like	1248	0	2	0.001	0.162229	7.34189	Up	0.342736	0.454649
MLOC_40056.1	Uncharacterized protein	protein	1254	0	2	0.001	0.161453	7.33497	Up	0.342736	0.460072
MLOC_54978.1	Predicted protein (Uncharacterized protein)	e3 ubiquitin-protein ligase pub23-like	1254	0	2	0.001	0.161453	7.33497	Up	0.342736	0.459225
MLOC_66918.1	Uncharacterized protein	wall-associated receptor kinase 5-like	1254	0	2	0.001	0.161453	7.33497	Up	0.342736	0.456452
MLOC_74758.1	Predicted protein (Uncharacterized protein)	wuschel-related homeobox 5-like	627	0	1	0.001	0.161453	7.33497	Up	0.617044	0.706062
MLOC_15580.1	Uncharacterized protein	high-affinity potassium transporter	1266	0	2	0.001	0.159922	7.32123	Up	0.342736	0.455812
MLOC_5208.1	Uncharacterized protein	e3 ubiquitin-protein ligase pub23-like	1275	0	2	0.001	0.158793	7.31101	Up	0.342736	0.454401
AK249939.1	-	nadp-specific glutamate dehydrogenase-like	1275	0	2	0.001	0.158793	7.31101	Up	0.342736	0.454125
MLOC_54768.1	Uncharacterized protein	protein	1335	16	3170	1.51591	240.376	7.30897	Up	0	0
AK249203.1	-	ribulose bisphosphate carboxylase oxygenase activase chloroplastic-like	1281	0	2	0.001	0.15805	7.30423	Up	0.342736	0.45215
MLOC_27003.1	Uncharacterized protein	reverse transcriptase	642	0	1	0.001	0.15768	7.30086	Up	0.617044	0.713729
MLOC_76259.1	Uncharacterized protein	2890791 aba-responsive	642	0	1	0.001	0.15768	7.30086	Up	0.617044	0.702308
AK370351	Hordeum vulgare subsp. vulgare mRNA for predicted protein, complete cds, clone: NIASHv2109C23	xylanase inhibitor taxi-iv	1290	0	2	0.001	0.156947	7.29413	Up	0.342736	0.459789
AK359118	Hordeum vulgare subsp. vulgare mRNA for predicted protein, complete cds, clone: NIASHv1089P19	cytokinin-o-glucosyltransferase 1	1290	0	2	0.001	0.156947	7.29413	Up	0.342736	0.457372
MLOC_46794.1	Uncharacterized protein	1665941 kelch repeat-containing f-box family expressed	651	0	1	0.001	0.155501	7.28078	Up	0.617044	0.710005
MLOC_38012.2	Uncharacterized protein (Fragment)	1847588 os02g0307900	651	0	1	0.001	0.155501	7.28078	Up	0.617044	0.703041
MLOC_50694.3	Uncharacterized protein	2895186 protein	1308	0	2	0.001	0.154787	7.27414	Up	0.342736	0.457596
AK359463	Hordeum vulgare subsp. vulgare mRNA for predicted protein, complete cds, clone: NIASHv1097I06	1338127 os05g0193100	654	0	1	0.001	0.154787	7.27414	Up	0.617044	0.707879
AK369534	Hordeum vulgare subsp. vulgare mRNA for predicted protein, complete cds, clone: NIASHv2092P19	choline dehydrogenase	1962	0	3	0.001	0.154787	7.27414	Up	0.190372	0.284509
AK354669	Hordeum vulgare subsp. vulgare mRNA for predicted protein, complete cds, clone: NIASHv1009M19	353045 senescence-associated protein	1308	0	2	0.001	0.154787	7.27414	Up	0.342736	0.45245
AK376058	Hordeum vulgare subsp. vulgare mRNA for predicted protein, complete cds, clone: NIASHv3113L16	802328 endo-polygalacturonase	1305	9	1736	0.8723	134.664	7.27033	Up	0	0
MLOC_70640.1	Uncharacterized protein	tpa: hlh dna-binding domain superfamily protein	657	0	1	0.001	0.15408	7.26754	Up	0.617044	0.712785
AK363888	Hordeum vulgare subsp. vulgare mRNA for predicted protein, complete cds, clone: NIASHv2019M01	xylanase inhibitor	1314	0	2	0.001	0.15408	7.26754	Up	0.342736	0.452724
MLOC_55131.3	Reticulon-like protein	reticulon-like protein b9-like	657	0	1	0.001	0.15408	7.26754	Up	0.617044	0.705655
AK362035	Hordeum vulgare subsp. vulgare mRNA for predicted protein, complete cds, clone: NIASHv2001P07	2614891 protein	1314	0	2	0.001	0.15408	7.26754	Up	0.342736	0.451904
MLOC_14075.1	Uncharacterized protein	1851204 os09g0304500	1323	0	2	0.001	0.153032	7.25769	Up	0.342736	0.454235
AK366492	Hordeum vulgare subsp. vulgare mRNA for predicted protein, partial cds, clone: NIASHv2043H09	udp-glycosyltransferase 74f2-like	1329	0	2	0.001	0.152341	7.25116	Up	0.342736	0.458409
AK373656	Hordeum vulgare subsp. vulgare mRNA for predicted protein, complete cds, clone: NIASHv3038N11	heat shock protein	1995	0	3	0.001	0.152227	7.25008	Up	0.190372	0.284685
AK366841	Hordeum vulgare subsp. vulgare mRNA for predicted protein, complete cds, clone: NIASHv2047F05	probable salt tolerance-like protein at1g75540-like	666	0	1	0.001	0.151998	7.24791	Up	0.617044	0.71237
AK376121	Hordeum vulgare subsp. vulgare mRNA for predicted protein, complete cds, clone: NIASHv3115C23	acetyl carboxylase	6690	0	10	0.001	0.151317	7.24143	Up	0.00310532	0.0079652
AK354626	Hordeum vulgare subsp. vulgare mRNA for predicted protein, complete cds, clone: NIASHv1009E09	1848271 partial	1350	0	2	0.001	0.149972	7.22855	Up	0.342736	0.459422
AK369808	Hordeum vulgare subsp. vulgare mRNA for predicted protein, partial cds, clone: NIASHv2098M21	protein	1362	0	2	0.001	0.14865	7.21578	Up	0.342736	0.455009
AK364066	Hordeum vulgare subsp. vulgare mRNA for predicted protein, complete cds, clone: NIASHv2021G01	maternal effect embryo arrest 18 protein	1362	0	2	0.001	0.14865	7.21578	Up	0.342736	0.451141
MLOC_73747.1	Uncharacterized protein	nbs-lrr type protein	684	0	1	0.001	0.147998	7.20944	Up	0.617044	0.706136
MLOC_64160.1	Uncharacterized protein	glucose sorbosone dehydrogenases-like protein	2052	0	3	0.001	0.147998	7.20944	Up	0.190372	0.284295
AK371491	Hordeum vulgare subsp. vulgare mRNA for predicted protein, partial cds, clone: NIASHv2135G14	2490208 os01g0228800	1368	0	2	0.001	0.147998	7.20944	Up	0.342736	0.452259
MLOC_12660.1	Uncharacterized protein	1032159 endo-polygalacturonase	690	0	1	0.001	0.146711	7.19684	Up	0.617044	0.710455
AK248182.1	-	oxysterol-binding family protein	1392	0	2	0.001	0.145447	7.18435	Up	0.342736	0.453465
MLOC_78164.1	Uncharacterized protein	cis-zeatin o-glucosyltransferase-like	1398	0	2	0.001	0.144822	7.17814	Up	0.342736	0.458859
MLOC_36926.1	Uncharacterized protein	retrotransposon line subclass	699	0	1	0.001	0.144822	7.17814	Up	0.617044	0.710717
AK374270	Hordeum vulgare subsp. vulgare mRNA for predicted protein, complete cds, clone: NIASHv3059B01	atp binding protein	699	0	1	0.001	0.144822	7.17814	Up	0.617044	0.706358
AK354047	Hordeum vulgare subsp. vulgare mRNA for predicted protein, complete cds, clone: NIASHv1004K13	bggp beta-1-3-galactosyl-o-glycosyl-glycoprotein	1404	0	2	0.001	0.144203	7.17196	Up	0.342736	0.453108
AK368527	Hordeum vulgare subsp. vulgare mRNA for predicted protein, partial cds, clone: NIASHv2075G05	protein	1407	0	2	0.001	0.143896	7.16888	Up	0.342736	0.450381
AK363829	Hordeum vulgare subsp. vulgare mRNA for predicted protein, complete cds, clone: NIASHv2019D19	3 -n-debenzoyl-2 -deoxytaxol n-benzoyltransferase-like	1410	0	2	0.001	0.14359	7.16581	Up	0.342736	0.45754
AK358937	Hordeum vulgare subsp. vulgare mRNA for predicted protein, complete cds, clone: NIASHv1086B18	myb protein	708	0	1	0.001	0.142981	7.15968	Up	0.617044	0.702234
MLOC_81173.1	Uncharacterized protein	2836221 os08g0553600	711	0	1	0.001	0.142378	7.15358	Up	0.617044	0.706654
MLOC_59593.1	Uncharacterized protein	nodulation-signaling pathway 2	1422	0	2	0.001	0.142378	7.15358	Up	0.342736	0.449273
MLOC_59319.1	Uncharacterized protein	protein	1425	0	2	0.001	0.142078	7.15054	Up	0.342736	0.459563
MLOC_67477.1	Uncharacterized protein	disease resistance protein rpm1-like	2850	0	4	0.001	0.142078	7.15054	Up	0.105742	0.177833
AK252263.1	-	1849246 os04g0166000	2142	0	3	0.001	0.14178	7.14751	Up	0.190372	0.285899
MLOC_62172.2	MATE efflux family protein	protein transparent testa 12-like	1431	0	2	0.001	0.141483	7.14448	Up	0.342736	0.457736
MLOC_57815.1	Uncharacterized protein	287719 nb-arc domain containing protein	1437	0	2	0.001	0.140892	7.13845	Up	0.342736	0.452642
MLOC_72146.1	Uncharacterized protein	udp-glycosyltransferase 89b1-like	1440	0	2	0.001	0.140598	7.13544	Up	0.342736	0.457764
MLOC_37235.1	MATE efflux family protein	mate efflux family protein 5-like	1440	0	2	0.001	0.140598	7.13544	Up	0.342736	0.449488
AK249633.1	-	727167 expressed	1446	0	2	0.001	0.140015	7.12944	Up	0.342736	0.458269
AK353611	Hordeum vulgare subsp. vulgare mRNA for predicted protein, partial cds, clone: NIASHv1001H04	u-box domain-containing protein 33-like	1449	0	2	0.001	0.139725	7.12645	Up	0.342736	0.454429
MLOC_56521.1	Predicted protein (Uncharacterized protein)	probable cyclic nucleotide-gated ion channel 5-like	2175	0	3	0.001	0.139629	7.12545	Up	0.190372	0.28531
MLOC_6867.1	rRNA N-glycosidase (EC 3.2.2.22)	anther-specific protein	726	0	1	0.001	0.139436	7.12346	Up	0.617044	0.702747
MLOC_43183.1	Uncharacterized protein (Fragment)	retrotransposon unclassified	726	0	1	0.001	0.139436	7.12346	Up	0.617044	0.701942
MLOC_34646.1	Uncharacterized protein	myb-related protein myb4-like	732	0	1	0.001	0.138294	7.11159	Up	0.617044	0.704916
MLOC_68493.1	Uncharacterized protein (Fragment)	alanyl-trna synthetase-like	1476	0	2	0.001	0.137169	7.09981	Up	0.342736	0.458184
MLOC_14080.1	Uncharacterized protein	glucan endo- -beta-glucosidase 8-like	1476	0	2	0.001	0.137169	7.09981	Up	0.342736	0.456758
AK364839	Hordeum vulgare subsp. vulgare mRNA for predicted protein, complete cds, clone: NIASHv2028M05	nb-arc domain containing expressed	1479	0	2	0.001	0.136891	7.09688	Up	0.342736	0.451468
MLOC_3978.1	Uncharacterized protein	subtilisin-like protease-like	1485	0	2	0.001	0.136338	7.09104	Up	0.342736	0.4581
AK357240	Hordeum vulgare subsp. vulgare mRNA for predicted protein, complete cds, clone: NIASHv1048N18	mterf family protein	1491	0	2	0.001	0.135789	7.08523	Up	0.342736	0.455563
MLOC_8168.1	Uncharacterized protein	udp-glycosyltransferase 75d1-like	1497	0	2	0.001	0.135245	7.07943	Up	0.342736	0.455979
AK371802	Hordeum vulgare subsp. vulgare mRNA for predicted protein, complete cds, clone: NIASHv2141K20	cinnamate 4-hydroxylase	1500	0	2	0.001	0.134974	7.07654	Up	0.342736	0.457624
MLOC_41071.1	Uncharacterized protein (Fragment)	scarecrow-like protein 32-like	750	0	1	0.001	0.134974	7.07654	Up	0.617044	0.706543
AK370623	Hordeum vulgare subsp. vulgare mRNA for predicted protein, complete cds, clone: NIASHv2113H03	protease do-like 9-like	1503	0	2	0.001	0.134705	7.07366	Up	0.342736	0.450652
AK365666	Hordeum vulgare subsp. vulgare mRNA for predicted protein, complete cds, clone: NIASHv2036B16	protein notum homolog	1506	0	2	0.001	0.134437	7.07078	Up	0.342736	0.451986
MLOC_15695.1	Uncharacterized protein	6b-interacting protein 1	753	0	1	0.001	0.134437	7.07078	Up	0.617044	0.702015
MLOC_34643.1	Uncharacterized protein	2799890 zinc knuckle domain containing	756	0	1	0.001	0.133903	7.06505	Up	0.617044	0.713087
AK355767	Hordeum vulgare subsp. vulgare mRNA for predicted protein, complete cds, clone: NIASHv1025J06	cytochrome p450 90b1-like	1515	0	2	0.001	0.133638	7.06219	Up	0.342736	0.454346
AK370455	Hordeum vulgare subsp. vulgare mRNA for predicted protein, complete cds, clone: NIASHv2111B14	dihydrolipoyl dehydrogenase mitochondrial-like	1515	0	2	0.001	0.133638	7.06219	Up	0.342736	0.453822
MLOC_16644.1	Uncharacterized protein	hsp20 alpha crystallin family protein	777	0	1	0.001	0.130284	7.02552	Up	0.617044	0.703812
MLOC_60553.3	Uncharacterized protein	glutamate receptor -like	1557	0	2	0.001	0.130033	7.02274	Up	0.342736	0.452752
AK373483	Hordeum vulgare subsp. vulgare mRNA for predicted protein, complete cds, clone: NIASHv3032H08	1345146 lipase	1557	0	2	0.001	0.130033	7.02274	Up	0.342736	0.452068
AK370820	Hordeum vulgare subsp. vulgare mRNA for predicted protein, partial cds, clone: NIASHv2117J08	tpa: thaumatin domain family protein	783	0	1	0.001	0.129286	7.01442	Up	0.617044	0.70721
MLOC_14659.1	Uncharacterized protein	resistance protein rga2	1572	0	2	0.001	0.128792	7.0089	Up	0.342736	0.456953
AK377157	Hordeum vulgare subsp. vulgare mRNA for predicted protein, complete cds, clone: NIASHv3150A08	uncharacterized transporter lpg1691-like	1575	0	2	0.001	0.128547	7.00615	Up	0.342736	0.458915
MLOC_67514.1	Uncharacterized protein	cytochrome p450	1584	0	2	0.001	0.127817	6.99793	Up	0.342736	0.456396
AK374516	Hordeum vulgare subsp. vulgare mRNA for predicted protein, partial cds, clone: NIASHv3067K02	pentatricopeptide repeat-containing protein at1g08070-like	1590	0	2	0.001	0.127334	6.99248	Up	0.342736	0.45609
MLOC_70761.3	Uncharacterized protein	cbs domain-containing protein cbscbspb3-like	1596	0	2	0.001	0.126856	6.98704	Up	0.342736	0.451522
MLOC_60482.1	Uncharacterized protein	f-box fbd lrr-repeat protein at1g13570-like	1599	0	2	0.001	0.126618	6.98434	Up	0.342736	0.459704
AK249381.1	-	apoptosis inhibitor 5-like	1602	0	2	0.001	0.126381	6.98163	Up	0.342736	0.456535
MLOC_51375.1	Uncharacterized protein	proton-dependent oligopeptide or low-affinity nitrate partial	1602	0	2	0.001	0.126381	6.98163	Up	0.342736	0.449327
MLOC_67109.1	Uncharacterized protein	cell envelope integrity inner membrane protein	804	0	1	0.001	0.125909	6.97624	Up	0.617044	0.711092
MLOC_18287.4	Predicted protein (Uncharacterized protein)	pore-forming toxin-like protein hfr-2	1620	0	2	0.001	0.124976	6.96551	Up	0.342736	0.453905
MLOC_42756.1	Uncharacterized protein	nbs-lrr type protein	810	0	1	0.001	0.124976	6.96551	Up	0.617044	0.704658
AK250369.1	-	440320 s-adenosyl-l-methionine: phosphoethanolamine n-methyltransferase	1494	1	156	0.084661	10.5703	6.9641	Up	1.15e-38	2.21e-37
MLOC_70810.1	Uncharacterized protein	cytochrome p450	1626	0	2	0.001	0.124515	6.96018	Up	0.342736	0.45914
MLOC_57199.2	Uncharacterized protein	800763 protein brevis radix-like 2	813	0	1	0.001	0.124515	6.96018	Up	0.617044	0.712936
MLOC_64412.1	Uncharacterized protein	cytochrome p450	1626	0	2	0.001	0.124515	6.96018	Up	0.342736	0.451169
MLOC_10750.1	E3 ubiquitin-protein ligase (EC 6.3.2.-)	e3 ubiquitin-protein ligase sina-like 7-like	825	0	1	0.001	0.122704	6.93904	Up	0.617044	0.706025
MLOC_1626.1	Uncharacterized protein	retrotransposon line subclass	834	0	1	0.001	0.12138	6.92339	Up	0.617044	0.70584
AK376875	Hordeum vulgare subsp. vulgare mRNA for predicted protein, complete cds, clone: NIASHv3142P13	tpa: thaumatin domain family protein	837	0	1	0.001	0.120945	6.91821	Up	0.617044	0.70143
MLOC_5944.1	Uncharacterized protein (Fragment)	ring-h2 finger protein atl80-like	840	0	1	0.001	0.120513	6.91304	Up	0.617044	0.713804
MLOC_27110.1	Uncharacterized protein (Fragment)	reverse transcriptase	846	0	1	0.001	0.119658	6.90278	Up	0.617044	0.713389
MLOC_36591.3	Uncharacterized protein	disease resistance protein rpm1-like	3399	0	4	0.001	0.11913	6.89639	Up	0.105742	0.178534
AK248541.1	-	cell division control protein 48 homolog b-like	1707	0	2	0.001	0.118607	6.89004	Up	0.342736	0.450517
MLOC_52260.1	Laccase (EC 1.10.3.2) (Benzenediol:oxygen oxidoreductase) (Diphenol oxidase) (Urishiol oxidase)	laccase family protein	1713	0	2	0.001	0.118191	6.88498	Up	0.342736	0.456814
AK373891	Hordeum vulgare subsp. vulgare mRNA for predicted protein, complete cds, clone: NIASHv3046H24	thylakoid-bound ascorbate peroxidase	1338	2	294	0.189063	22.2436	6.87837	Up	8.19e-72	2.76e-70
MLOC_51160.1	Uncharacterized protein	galactoside 2-alpha-l-fucosyltransferase-like	1722	0	2	0.001	0.117574	6.87742	Up	0.342736	0.451359
AK373824	Hordeum vulgare subsp. vulgare mRNA for predicted protein, complete cds, clone: NIASHv3044K06	carbamoyl-phosphate synthase	3516	0	4	0.001	0.115166	6.84757	Up	0.105742	0.177887
MLOC_34706.1	Predicted protein (Uncharacterized protein)	cral trio domain sec14p-like phosphatidylinositol transfer family protein	1770	0	2	0.001	0.114385	6.83776	Up	0.342736	0.458493
AK367303	Hordeum vulgare subsp. vulgare mRNA for predicted protein, complete cds, clone: NIASHv2054G08	l-gulonolactone oxidase-like	1773	0	2	0.001	0.114192	6.83531	Up	0.342736	0.457149
MLOC_10384.1	Uncharacterized protein	carboxyl-terminal proteinase	888	0	1	0.001	0.113999	6.83287	Up	0.617044	0.704143
MLOC_24328.1	Uncharacterized protein	s-domain receptor-like protein kinase	1788	0	2	0.001	0.113234	6.82316	Up	0.342736	0.449569
MLOC_34636.1	Uncharacterized protein	727718 myb-like dna-binding domain containing expressed	897	0	1	0.001	0.112855	6.81833	Up	0.617044	0.703775
MLOC_9846.1	Uncharacterized protein	abc transporter c family member 10-like isoform 1	1800	0	2	0.001	0.112479	6.81351	Up	0.342736	0.458971
MLOC_59980.1	Uncharacterized protein	2837685 nb-arc domain-containing protein	1818	0	2	0.001	0.111365	6.79915	Up	0.342736	0.450761
MLOC_4622.2	Uncharacterized protein	3789 protein	909	0	1	0.001	0.111365	6.79915	Up	0.617044	0.701211
MLOC_16843.1	Uncharacterized protein	salutaridine reductase-like	918	0	1	0.001	0.110273	6.78494	Up	0.617044	0.707136
AK368350	Hordeum vulgare subsp. vulgare mRNA for predicted protein, complete cds, clone: NIASHv2072H10	2667964 receptor serine threonine kinase pr5k	1842	0	2	0.001	0.109914	6.78023	Up	0.342736	0.458662
AK249378.1	-	25517 os09g0442400	1842	0	2	0.001	0.109914	6.78023	Up	0.342736	0.457121
MLOC_56184.1	Uncharacterized protein		228	3	411	1.66426	182.482	6.77673	Up	1.3e-99	5.97e-98
AK356307	Hordeum vulgare subsp. vulgare mRNA for predicted protein, complete cds, clone: NIASHv1032O17	clathrin assembly protein at2g25430-like	1848	0	2	0.001	0.109557	6.77554	Up	0.342736	0.458606
MLOC_73192.2	Uncharacterized protein	1632124 os02g0642600	2772	0	3	0.001	0.109557	6.77554	Up	0.190372	0.283771
AK369666	Hordeum vulgare subsp. vulgare mRNA for predicted protein, complete cds, clone: NIASHv2095F13	leucine-rich repeat receptor-like protein kinase at2g19210-like	2781	0	3	0.001	0.109203	6.77086	Up	0.190372	0.285742
MLOC_45376.1	Uncharacterized protein	protein	1359	14	1910	1.30299	142.274	6.7707	Up	0	0
MLOC_21848.2	Peroxidase (EC 1.11.1.7)	peroxidase 70-like	942	0	1	0.001	0.107464	6.74771	Up	0.617044	0.702344
AK375117	Hordeum vulgare subsp. vulgare mRNA for predicted protein, complete cds, clone: NIASHv3085K14	pollen allergen phl p	1563	6	804	0.485541	52.0727	6.74479	Up	1.66e-193	1.38e-191
MLOC_77669.3	Uncharacterized protein	2550900 erebp-like protein	945	0	1	0.001	0.107123	6.74312	Up	0.617044	0.703004
MLOC_77310.1	Uncharacterized protein	disease resistance protein rpm1-like	1893	0	2	0.001	0.106953	6.74083	Up	0.342736	0.457792
MLOC_57180.1	Uncharacterized protein	receptor-like serine threonine-protein kinase sd1-8-like	1899	0	2	0.001	0.106615	6.73627	Up	0.342736	0.452889
MLOC_17983.1	Uncharacterized protein	2891072 protein	957	0	1	0.001	0.105779	6.72491	Up	0.617044	0.705027
AK362367	Hordeum vulgare subsp. vulgare mRNA for predicted protein, complete cds, clone: NIASHv2004I14	gibberellin 20 oxidase 3-like	966	0	1	0.001	0.104794	6.71141	Up	0.617044	0.710867
MLOC_14724.2	Uncharacterized protein	duf593 domain containing family protein	1959	0	2	0.001	0.10335	6.69139	Up	0.342736	0.456035
MLOC_10971.1	Uncharacterized protein	49512 dehydration-responsive protein rd22-like	1962	0	2	0.001	0.103191	6.68918	Up	0.342736	0.458521
MLOC_64190.1	Uncharacterized protein	cysteine-rich receptor-like protein kinase 10-like	1965	0	2	0.001	0.103034	6.68698	Up	0.342736	0.458437
AK353713	Hordeum vulgare subsp. vulgare mRNA for predicted protein, complete cds, clone: NIASHv1002E04	2606322 protein	1965	0	2	0.001	0.103034	6.68698	Up	0.342736	0.450435
AK248928.1	-	heat shock protein 70	1971	0	2	0.001	0.10272	6.68258	Up	0.342736	0.451686
MLOC_16345.1	Uncharacterized protein	dnaj protein	987	0	1	0.001	0.102564	6.68038	Up	0.617044	0.712559
AK365850	Hordeum vulgare subsp. vulgare mRNA for predicted protein, complete cds, clone: NIASHv2038E07	protein	1980	0	2	0.001	0.102253	6.676	Up	0.342736	0.452615
AK361559	Hordeum vulgare subsp. vulgare mRNA for predicted protein, complete cds, clone: NIASHv1143K18	soluble acid invertase	1995	0	2	0.001	0.101485	6.66512	Up	0.342736	0.45011
AK356684	Hordeum vulgare subsp. vulgare mRNA for predicted protein, partial cds, clone: NIASHv1038A09	847922 cc-nbs-lrr resistance protein mla13	1998	0	2	0.001	0.101332	6.66295	Up	0.342736	0.456563
AK375411	Hordeum vulgare subsp. vulgare mRNA for predicted protein, complete cds, clone: NIASHv3093I05	predicted protein	261	9	1137	4.3615	440.994	6.65979	Up	3.19e-272	3.55e-270
MLOC_25875.1	Peroxidase (EC 1.11.1.7)	peroxidase 5-like	1002	0	1	0.001	0.101029	6.65862	Up	0.617044	0.71113
MLOC_67385.1	Uncharacterized protein	probable metal-nicotianamine transporter ysl6-like isoform 1	2010	0	2	0.001	0.100727	6.65431	Up	0.342736	0.460015
MLOC_53465.1	-	protein strubbelig-receptor family 5-like	2016	0	2	0.001	0.100427	6.65001	Up	0.342736	0.455618
MLOC_75496.6	Uncharacterized protein	hd1-like protein	1008	0	1	0.001	0.100427	6.65001	Up	0.617044	0.704327
MLOC_74585.1	Predicted protein (Uncharacterized protein)	895749 root cap protein 1	1011	0	1	0.001	0.100129	6.64572	Up	0.617044	0.711693
AK358358	Hordeum vulgare subsp. vulgare mRNA for predicted protein, complete cds, clone: NIASHv1074N05	probable aldehyde oxidase 2-like	4047	0	4	0.001	0.100055	6.64465	Up	0.105742	0.179032
AK248922.1	-	zinc finger ccch domain-containing protein 7-like	2028	0	2	0.001	0.0998332	6.64145	Up	0.342736	0.45476
MLOC_60648.1	Uncharacterized protein	protein terminal ear1-like	2031	0	2	0.001	0.0996857	6.63932	Up	0.342736	0.458718
MLOC_74632.1	Uncharacterized protein	b3 domain-containing protein os03g0619600-like	2034	0	2	0.001	0.0995387	6.63719	Up	0.342736	0.453382
MLOC_74149.3	Uncharacterized protein	2654766 cellulose synthase-like protein slf1	2040	0	2	0.001	0.0992459	6.63294	Up	0.342736	0.459478
AK375243	Hordeum vulgare subsp. vulgare mRNA for predicted protein, complete cds, clone: NIASHv3089B03	low quality protein: tyrosine n-monooxygenase-like	1023	0	1	0.001	0.0989549	6.6287	Up	0.617044	0.711355
AK366632	Hordeum vulgare subsp. vulgare mRNA for predicted protein, complete cds, clone: NIASHv2045B19	disease resistance protein rpm1-like	2046	0	2	0.001	0.0989549	6.6287	Up	0.342736	0.451223
AK373388	Hordeum vulgare subsp. vulgare mRNA for predicted protein, complete cds, clone: NIASHv3029F10	bel1-type homeodomain protein	1026	0	1	0.001	0.0986656	6.62447	Up	0.617044	0.709669
AK363601	Hordeum vulgare subsp. vulgare mRNA for predicted protein, complete cds, clone: NIASHv2017C18	cell envelope integrity inner membrane protein	1026	0	1	0.001	0.0986656	6.62447	Up	0.617044	0.706284
MLOC_62927.1	Predicted protein (Uncharacterized protein)	protein	1032	0	1	0.001	0.0980919	6.61606	Up	0.617044	0.709631
MLOC_61102.1	Peroxidase (EC 1.11.1.7)	75837 class iii secretory plant peroxidase family protein	1035	0	1	0.001	0.0978076	6.61187	Up	0.617044	0.711881
MLOC_2513.2	Predicted protein (Uncharacterized protein)	811230 aim1 protein	2076	0	2	0.001	0.0975249	6.6077	Up	0.342736	0.456313
AK367402	Hordeum vulgare subsp. vulgare mRNA for predicted protein, complete cds, clone: NIASHv2056I24	2238574 chain structure of mutant rip from barley seeds in complex with adenine (amp-incubated)	2088	0	2	0.001	0.0969644	6.59938	Up	0.342736	0.455202
AK354867	Hordeum vulgare subsp. vulgare mRNA for predicted protein, complete cds, clone: NIASHv1012I05	nbs-lrr disease resistance protein homologue	4212	0	4	0.001	0.0961357	6.587	Up	0.105742	0.178052
MLOC_18030.1	Uncharacterized protein	protein kinase superfamily protein	1056	0	1	0.001	0.0958626	6.5829	Up	0.617044	0.709557
MLOC_52911.4	Uncharacterized protein	u-box domain-containing protein 34-like	2124	0	2	0.001	0.095321	6.57472	Up	0.342736	0.449975
MLOC_67693.1	Uncharacterized protein	retrotransposon unclassified	1071	0	1	0.001	0.0945199	6.56255	Up	0.617044	0.704474
MLOC_5270.2	Uncharacterized protein	2880154 os02g0785000	1077	0	1	0.001	0.0939934	6.55449	Up	0.617044	0.701321
AK364073	Hordeum vulgare subsp. vulgare mRNA for predicted protein, complete cds, clone: NIASHv2021H09	phosphatidate cytidylyltransferase-like	1080	0	1	0.001	0.0937323	6.55047	Up	0.617044	0.71143
AK375087	Hordeum vulgare subsp. vulgare mRNA for predicted protein, partial cds, clone: NIASHv3085C02	beta-galactosidase precursor	2163	0	2	0.001	0.0936023	6.54847	Up	0.342736	0.456619
MLOC_76488.3	Uncharacterized protein	pentatricopeptide repeat-containing protein at4g02750-like	2166	0	2	0.001	0.0934726	6.54647	Up	0.342736	0.454594
MLOC_12195.1	Uncharacterized protein	ulp1 protease family protein	2175	0	2	0.001	0.0930858	6.54049	Up	0.342736	0.450951
AK370408	Hordeum vulgare subsp. vulgare mRNA for predicted protein, complete cds, clone: NIASHv2110E13	392386 annexin	1089	0	1	0.001	0.0929576	6.5385	Up	0.617044	0.707768
MLOC_39556.1	Uncharacterized protein	nac domain transcription factor superfamily protein	1089	0	1	0.001	0.0929576	6.5385	Up	0.617044	0.703077
MLOC_30414.1	Uncharacterized protein	reverse transcriptase	1095	0	1	0.001	0.0924483	6.53057	Up	0.617044	0.702674
MLOC_21205.1	Predicted protein (Uncharacterized protein)	auxin-induced protein 5ng4-like	1095	0	1	0.001	0.0924483	6.53057	Up	0.617044	0.702125
MLOC_55770.2	Uncharacterized protein	probable o-methyltransferase 2-like	1098	0	1	0.001	0.0921957	6.52663	Up	0.617044	0.712596
AK366040	Hordeum vulgare subsp. vulgare mRNA for predicted protein, complete cds, clone: NIASHv2039P15	speckle-type poz protein	1101	0	1	0.001	0.0919445	6.52269	Up	0.617044	0.712709
MLOC_25677.1	Uncharacterized protein	2603125 disease resistance gene homolog 9n	2217	0	2	0.001	0.0913224	6.5129	Up	0.342736	0.4574
AK377123	Hordeum vulgare subsp. vulgare mRNA for predicted protein, complete cds, clone: NIASHv3149A08	probable lrr receptor-like serine threonine-protein kinase rlk-like	2226	0	2	0.001	0.0909531	6.50705	Up	0.342736	0.455785
MLOC_2207.2	Predicted protein (Uncharacterized protein)	filament-like plant protein 7-like	2226	0	2	0.001	0.0909531	6.50705	Up	0.342736	0.452943
MLOC_70288.1	Potassium transporter	high-affinity potassium transporter	2229	0	2	0.001	0.0908307	6.50511	Up	0.342736	0.458072
AK374329	Hordeum vulgare subsp. vulgare mRNA for predicted protein, complete cds, clone: NIASHv3060O06	mitochondrial phosphate carrier protein	1122	0	1	0.001	0.0902236	6.49543	Up	0.617044	0.702198
MLOC_47456.1	Uncharacterized protein	probable beta-d-xylosidase 7-like	2298	0	2	0.001	0.0881034	6.46113	Up	0.342736	0.451305
AK364617	Hordeum vulgare subsp. vulgare mRNA for predicted protein, partial cds, clone: NIASHv2026P13	disease resistance protein rpm1-like	2307	0	2	0.001	0.0877597	6.45549	Up	0.342736	0.455646
MLOC_14970.2	Uncharacterized protein	2770578 os07g0421000	1155	0	1	0.001	0.0876458	6.45361	Up	0.617044	0.70488
MLOC_33375.1	Uncharacterized protein	retrotransposon unclassified	1161	0	1	0.001	0.0871928	6.44614	Up	0.617044	0.713049
MLOC_14077.1	Uncharacterized protein	2610687 protein	1161	0	1	0.001	0.0871928	6.44614	Up	0.617044	0.70499
MLOC_69392.1	Uncharacterized protein	nbs-lrr disease resistance protein homologue	2337	0	2	0.001	0.0866332	6.43685	Up	0.342736	0.451196
AK356986	Hordeum vulgare subsp. vulgare mRNA for predicted protein, complete cds, clone: NIASHv1043J23	2509608 anion channel protein	2361	0	2	0.001	0.0857525	6.42211	Up	0.342736	0.457344
MLOC_7013.1	Uncharacterized protein	subtilisin-like protease	2364	0	2	0.001	0.0856437	6.42028	Up	0.342736	0.454098
AK368117	Hordeum vulgare subsp. vulgare mRNA for predicted protein, complete cds, clone: NIASHv2068H02	851059 class iii chitinase homologue ( hib3h-a)	903	2	213	0.280141	23.8784	6.41341	Up	2.1e-51	5.18e-50
MLOC_66924.2	Uncharacterized protein	nac domain-containing protein 43-like	1194	0	1	0.001	0.084783	6.4057	Up	0.617044	0.712032
MLOC_44678.1	Uncharacterized protein	12-oxophytodienoate reductase 5-like	1197	0	1	0.001	0.0845705	6.40208	Up	0.617044	0.709818
AK375738	Hordeum vulgare subsp. vulgare mRNA for predicted protein, complete cds, clone: NIASHv3103B10	gdsl esterase lipase at1g28600-like	1203	0	1	0.001	0.0841487	6.39487	Up	0.617044	0.709183
MLOC_33320.1	Uncharacterized protein	retrotransposon unclassified	1215	0	1	0.001	0.0833176	6.38055	Up	0.617044	0.708251
AK369396	Hordeum vulgare subsp. vulgare mRNA for predicted protein, complete cds, clone: NIASHv2090G23	receptor-like serine threonine-protein kinase sd1-8-like	2451	0	2	0.001	0.0826037	6.36813	Up	0.342736	0.452779
MLOC_11617.1	Serine/threonine-protein kinase (EC 2.7.11.1)	receptor-like protein kinase	2469	0	2	0.001	0.0820015	6.35758	Up	0.342736	0.458802
AK376436	Hordeum vulgare subsp. vulgare mRNA for predicted protein, complete cds, clone: NIASHv3124C17	g-type lectin s-receptor-like serine threonine-protein kinase at2g19130-like	2469	0	2	0.001	0.0820015	6.35758	Up	0.342736	0.458549
MLOC_67942.1	Uncharacterized protein	2883815 os09g0324400	1236	0	1	0.001	0.081902	6.35583	Up	0.617044	0.713275
MLOC_12929.1	Predicted protein (Uncharacterized protein)	polygalacturonase precursor	1236	0	1	0.001	0.081902	6.35583	Up	0.617044	0.701394
AK252852.1	-	proline-rich protein	1407	6	609	0.539375	43.8163	6.34404	Up	1.98e-144	1.26e-142
AK374174	Hordeum vulgare subsp. vulgare mRNA for predicted protein, complete cds, clone: NIASHv3056N04	phospholipase d	2493	0	2	0.001	0.0812121	6.34362	Up	0.342736	0.450924
MLOC_68931.1	Uncharacterized protein	2441881 defensin	228	1	101	0.554752	44.8435	6.33691	Up	8.33e-25	1.09e-23
AK360069	Hordeum vulgare subsp. vulgare mRNA for predicted protein, complete cds, clone: NIASHv1109H09	542449 srk	2505	0	2	0.001	0.080823	6.33669	Up	0.342736	0.458887
MLOC_5642.4	Uncharacterized protein	iq calmodulin-binding motif family protein	1254	0	1	0.001	0.0807264	6.33497	Up	0.617044	0.709146
MLOC_52680.1	Uncharacterized protein	1851417 os10g0568300	1254	0	1	0.001	0.0807264	6.33497	Up	0.617044	0.704695
MLOC_64945.1	Uncharacterized protein	subtilisin-like protease	2523	0	2	0.001	0.0802464	6.32637	Up	0.342736	0.453135
MLOC_59962.1	Serine/threonine-protein kinase (EC 2.7.11.1)	s-domain receptor-like protein kinase	2526	0	2	0.001	0.0801511	6.32465	Up	0.342736	0.450164
MLOC_44309.9	Uncharacterized protein	protein kinase xa21	2538	0	2	0.001	0.0797721	6.31781	Up	0.342736	0.4601
MLOC_70402.2	Serine/threonine-protein kinase (EC 2.7.11.1)	g-type lectin s-receptor-like serine threonine-protein kinase at2g19130-like	2538	0	2	0.001	0.0797721	6.31781	Up	0.342736	0.454567
MLOC_56737.5	Uncharacterized protein	61542 os01g0812050	2541	0	2	0.001	0.079678	6.31611	Up	0.342736	0.455729
MLOC_10080.1	Serine/threonine-protein kinase (EC 2.7.11.1)	g-type lectin s-receptor-like serine threonine-protein kinase b120-like	2544	0	2	0.001	0.079584	6.31441	Up	0.342736	0.450002
MLOC_68132.2	Uncharacterized protein	vacuolar amino acid transporter 1-like	1275	0	1	0.001	0.0793968	6.31101	Up	0.617044	0.709968
AK361825	Hordeum vulgare subsp. vulgare mRNA for predicted protein, complete cds, clone: NIASHv1150E15	fructose- - chloroplastic-like	1290	0	1	0.001	0.0784735	6.29413	Up	0.617044	0.709295
AK357665	Hordeum vulgare subsp. vulgare mRNA for predicted protein, complete cds, clone: NIASHv1058N15	pap-specific mitochondrial-like	1290	0	1	0.001	0.0784735	6.29413	Up	0.617044	0.70747
AK363795	Hordeum vulgare subsp. vulgare mRNA for predicted protein, complete cds, clone: NIASHv2018P09	1245723 os04g0538800	2619	0	2	0.001	0.077305	6.27249	Up	0.342736	0.452122
AK355299	Hordeum vulgare subsp. vulgare mRNA for predicted protein, complete cds, clone: NIASHv1018L10	agmatine coumaroyltransferase	1317	0	1	0.001	0.0768647	6.26425	Up	0.617044	0.709109
MLOC_60889.1	Uncharacterized protein	50507 polygalacturonase	1329	0	1	0.001	0.0761707	6.25116	Up	0.617044	0.709071
AK371584	Hordeum vulgare subsp. vulgare mRNA for predicted protein, partial cds, clone: NIASHv2137J01	benzyl alcohol o-benzoyltransferase-like	1329	0	1	0.001	0.0761707	6.25116	Up	0.617044	0.708736
MLOC_69207.1	Predicted protein (Uncharacterized protein)	probable methyltransferase pmt26-like	2676	0	2	0.001	0.0756583	6.24143	Up	0.342736	0.458774
MLOC_15093.1	Uncharacterized protein	2702679 ire	2679	0	2	0.001	0.0755736	6.23981	Up	0.342736	0.452232
AK374409	Hordeum vulgare subsp. vulgare mRNA for predicted protein, complete cds, clone: NIASHv3064B13	pectate lyase homolog	1344	0	1	0.001	0.0753206	6.23497	Up	0.617044	0.707099
MLOC_56758.1	Uncharacterized protein	pentatricopeptide repeat-containing protein at3g29230-like	1350	0	1	0.001	0.0749858	6.22855	Up	0.617044	0.708214
MLOC_38268.1	Uncharacterized protein	receptor kinase 5	1362	0	1	0.001	0.0743252	6.21578	Up	0.617044	0.712446
MLOC_73851.1	Predicted protein (Uncharacterized protein)	2628126 benzoyl- :benzyl alcohol phenylethanol benzoyltransferase bpbt	1383	0	1	0.001	0.0731966	6.1937	Up	0.617044	0.703922
AK360403	Hordeum vulgare subsp. vulgare mRNA for predicted protein, complete cds, clone: NIASHv1117F15	2752855 os07g0646600	1386	0	1	0.001	0.0730381	6.19058	Up	0.617044	0.708885
MLOC_61355.1	Uncharacterized protein	sulfate transporter-like	1386	0	1	0.001	0.0730381	6.19058	Up	0.617044	0.705692
AK357603	Hordeum vulgare subsp. vulgare mRNA for predicted protein, complete cds, clone: NIASHv1057H10	protein chloroplast import apparatus 2-like	1386	0	1	0.001	0.0730381	6.19058	Up	0.617044	0.70418
MLOC_68494.1	Alanine--tRNA ligase (EC 6.1.1.7) (Alanyl-tRNA synthetase)	alanyl-trna synthetase	1392	0	1	0.001	0.0727233	6.18435	Up	0.617044	0.704032
MLOC_18121.2	Uncharacterized protein	rp1-like protein	2793	0	2	0.001	0.072489	6.17969	Up	0.342736	0.453245
MLOC_25001.3	Uncharacterized protein	nbs-lrr disease resistance protein homologue	1398	0	1	0.001	0.0724112	6.17814	Up	0.617044	0.706876
AK376195	Hordeum vulgare subsp. vulgare mRNA for predicted protein, complete cds, clone: NIASHv3117L17	nitrate transporter -like	1401	0	1	0.001	0.0722561	6.17505	Up	0.617044	0.707805
MLOC_13576.2	Uncharacterized protein	potassium channel kor2-like	1404	0	1	0.001	0.0721017	6.17196	Up	0.617044	0.712408
AK367892	Hordeum vulgare subsp. vulgare mRNA for predicted protein, complete cds, clone: NIASHv2064E17	serine carboxypeptidase-like 19-like	1404	0	1	0.001	0.0721017	6.17196	Up	0.617044	0.704769
MLOC_25063.1	Uncharacterized protein	hybrid signal transduction histidine kinase a-like	165	1	90	0.766566	55.2168	6.17055	Up	4.8e-22	5.64e-21
MLOC_66581.3	Uncharacterized protein	847922 cc-nbs-lrr resistance protein mla13	2826	0	2	0.001	0.0716425	6.16274	Up	0.342736	0.45883
MLOC_14974.1	-	transporter arsb-like	1422	0	1	0.001	0.0711891	6.15358	Up	0.617044	0.707322
AK374632	Hordeum vulgare subsp. vulgare mRNA for predicted protein, complete cds, clone: NIASHv3071D15	atpase plasma membrane-type-like	2850	0	2	0.001	0.0710392	6.15054	Up	0.342736	0.451659
MLOC_73076.2	Uncharacterized protein	861414 cysteine proteinase (ec -) - rice	1095	4	347	0.46204	32.0795	6.11749	Up	6.81e-82	2.57e-80
MLOC_13942.2	Uncharacterized protein	cytochrome p450 716b1-like	1464	0	1	0.001	0.0691468	6.11159	Up	0.617044	0.707433
MLOC_69492.2	Uncharacterized protein	nbs-lrr disease resistance protein homologue	4401	0	3	0.001	0.0690054	6.10864	Up	0.190372	0.285388
AK373793	Hordeum vulgare subsp. vulgare mRNA for predicted protein, complete cds, clone: NIASHv3043N03	alpha-l-fucosidase 1-like	1467	0	1	0.001	0.0690054	6.10864	Up	0.617044	0.708624
MLOC_45058.1	3-ketoacyl-CoA synthase (EC 2.3.1.-)	3-ketoacyl- synthase 6-like	1473	0	1	0.001	0.0687243	6.10275	Up	0.617044	0.707954
AK357767	Hordeum vulgare subsp. vulgare mRNA for predicted protein, complete cds, clone: NIASHv1061H16	pentatricopeptide repeat-containing protein mitochondrial-like	1473	0	1	0.001	0.0687243	6.10275	Up	0.617044	0.703738
AK366051	Hordeum vulgare subsp. vulgare mRNA for predicted protein, partial cds, clone: NIASHv2040A20	25629 glucosyltransferase-10	1482	0	1	0.001	0.0683069	6.09396	Up	0.617044	0.704585
MLOC_69835.1	Uncharacterized protein	pentatricopeptide repeat-containing protein mitochondrial	2967	0	2	0.001	0.0682379	6.0925	Up	0.342736	0.453355
AK375506	Hordeum vulgare subsp. vulgare mRNA for predicted protein, complete cds, clone: NIASHv3096E10	1675556 os12g0506700	3159	10	852	0.400391	27.3025	6.09148	Up	5.56e-199	4.78e-197
AK250565.1	-	429408 endo- -beta-glucanase	1863	2	170	0.135785	9.23738	6.08809	Up	1.29e-40	2.6e-39
MLOC_31922.1	Uncharacterized protein	61523 os01g0175500	1323	1	85	0.0956035	6.50387	6.08809	Up	8.59e-21	9.59e-20
MLOC_11606.4	Uncharacterized protein	myosin-h heavy chain-like	1491	0	1	0.001	0.0678946	6.08523	Up	0.617044	0.702088
MLOC_68636.1	Uncharacterized protein	cytochrome p450 superfamily protein	1491	0	1	0.001	0.0678946	6.08523	Up	0.617044	0.701467
MLOC_10466.1	Uncharacterized protein	1849246 os04g0166000	3033	0	2	0.001	0.066753	6.06076	Up	0.342736	0.453437
MLOC_46450.3	Uncharacterized protein	callose synthase 5-like	3036	0	2	0.001	0.066687	6.05933	Up	0.342736	0.459168
AK376661	Hordeum vulgare subsp. vulgare mRNA for predicted protein, complete cds, clone: NIASHv3130N12	69663 sf16 protein	1530	0	1	0.001	0.066164	6.04797	Up	0.617044	0.703959
MLOC_61101.1	Predicted protein (Uncharacterized protein)	probable carboxylesterase 2-like	1011	7	573	0.875751	57.3742	6.03374	Up	7.93e-134	4.68e-132
AK374060	Hordeum vulgare subsp. vulgare mRNA for predicted protein, complete cds, clone: NIASHv3052J08	premnaspirodiene oxygenase-like	1563	0	1	0.001	0.064767	6.01719	Up	0.617044	0.709744
AK362768	Hordeum vulgare subsp. vulgare mRNA for predicted protein, complete cds, clone: NIASHv2009P11	tpa: duf26-domain receptor-like protein kinase family protein	1563	0	1	0.001	0.064767	6.01719	Up	0.617044	0.705618
AK358184	Hordeum vulgare subsp. vulgare mRNA for predicted protein, complete cds, clone: NIASHv1070M10	protein spinster homolog 1-like	1572	0	1	0.001	0.0643962	6.0089	Up	0.617044	0.710267
MLOC_49455.3	Uncharacterized protein	probable polyol transporter 4-like	1575	0	1	0.001	0.0642736	6.00615	Up	0.617044	0.703444
MLOC_13683.1	Uncharacterized protein	lrr protein	3162	0	2	0.001	0.0640296	6.00067	Up	0.342736	0.449624
MLOC_12807.2	Uncharacterized protein	probable leucine-rich repeat receptor-like protein kinase at1g35710-like	3168	0	2	0.001	0.0639084	5.99793	Up	0.342736	0.449705
MLOC_80835.2	Uncharacterized protein	2832512 os08g0566700	1605	0	1	0.001	0.0630722	5.97893	Up	0.617044	0.712257
MLOC_40380.2	Uncharacterized protein	retrotransposon unclassified	1620	0	1	0.001	0.0624882	5.96551	Up	0.617044	0.71354
MLOC_67523.1	Uncharacterized protein	predicted protein	396	1	78	0.319403	19.9394	5.9641	Up	4.85e-19	5.03e-18
AK365257	Hordeum vulgare subsp. vulgare mRNA for predicted protein, complete cds, clone: NIASHv2032L19	probable receptor-like protein kinase at1g67000-like	2073	1	77	0.0610147	3.76014	5.94549	Up	8.62e-19	8.86e-18
AK363254	Hordeum vulgare subsp. vulgare mRNA for predicted protein, complete cds, clone: NIASHv2013M05	disease resistance rpp13-like protein 4-like	1644	0	1	0.001	0.0615759	5.94429	Up	0.617044	0.708661
MLOC_71005.1	Uncharacterized protein	cytochrome p450	1653	0	1	0.001	0.0612407	5.93642	Up	0.617044	0.708177
MLOC_18340.1	Uncharacterized protein	angio-associated migratory cell	1194	2	152	0.211865	12.887	5.92663	Up	4.08e-36	7.34e-35
MLOC_36901.3	Uncharacterized protein	1666156 ame: full=probable protein phosphatase 2c 31 short= 2c31	1839	4	303	0.275114	16.6791	5.92187	Up	6.87e-71	2.28e-69
MLOC_65398.2	Uncharacterized protein	type i inositol- -trisphosphate 5-phosphatase cvp2-like	1671	0	1	0.001	0.060581	5.92079	Up	0.617044	0.706951
AK364778	Hordeum vulgare subsp. vulgare mRNA for predicted protein, complete cds, clone: NIASHv2028F05	2667964 receptor serine threonine kinase pr5k	1677	0	1	0.001	0.0603643	5.91562	Up	0.617044	0.702967
MLOC_7719.1	Uncharacterized protein	nbs-lrr disease resistance protein homologue	1677	0	1	0.001	0.0603643	5.91562	Up	0.617044	0.702418
MLOC_67608.3	Uncharacterized protein	1879492 nbs-lrr resistance partial	3372	0	2	0.001	0.060042	5.9079	Up	0.342736	0.459394
AK374591	Hordeum vulgare subsp. vulgare mRNA for predicted protein, partial cds, clone: NIASHv3069O18	eukaryotic translation initiation factor 5b	2340	8	596	0.432422	25.7836	5.89787	Up	4.7e-138	2.86e-136
MLOC_65155.1	Uncharacterized protein	protein kinase xa21	3435	0	2	0.001	0.0589408	5.8812	Up	0.342736	0.457568
AK374961	Hordeum vulgare subsp. vulgare mRNA for predicted protein, complete cds, clone: NIASHv3081G21	probable pectinesterase pectinesterase inhibitor 58-like	3441	0	2	0.001	0.058838	5.87868	Up	0.342736	0.454208
MLOC_75304.1	Laccase (EC 1.10.3.2) (Benzenediol:oxygen oxidoreductase) (Diphenol oxidase) (Urishiol oxidase)	laccase precursor	1743	0	1	0.001	0.0580785	5.85993	Up	0.617044	0.712672
AK361627	Hordeum vulgare subsp. vulgare mRNA for predicted protein, complete cds, clone: NIASHv1145F03	translation elongation factor 1a	1380	1	72	0.0916547	5.28161	5.84863	Up	1.53e-17	1.49e-16
MLOC_34687.4	Uncharacterized protein	wall-associated receptor kinase 5-like	1791	0	1	0.001	0.056522	5.82074	Up	0.617044	0.701613
AK374953	Hordeum vulgare subsp. vulgare mRNA for predicted protein, complete cds, clone: NIASHv3081C23	probable e3 ubiquitin-protein ligase ari7-like	1794	0	1	0.001	0.0564275	5.81833	Up	0.617044	0.711543
AK359904	Hordeum vulgare subsp. vulgare mRNA for predicted protein, complete cds, clone: NIASHv1106C13	2612671 protein	558	1	70	0.226673	12.6992	5.80798	Up	4.82e-17	4.58e-16
AK363629	Hordeum vulgare subsp. vulgare mRNA for predicted protein, complete cds, clone: NIASHv2017H17	nadp-dependent malic enzyme	1833	0	1	0.001	0.0552269	5.7873	Up	0.617044	0.708437
AK373931	Hordeum vulgare subsp. vulgare mRNA for predicted protein, complete cds, clone: NIASHv3048B23	fatty acyl- reductase 2-like	1851	0	1	0.001	0.0546898	5.7732	Up	0.617044	0.705285
MLOC_10574.3	Uncharacterized protein	1392418 nbs-lrr partial	1887	0	1	0.001	0.0536465	5.74541	Up	0.617044	0.702894
MLOC_4581.2	Uncharacterized protein	nbs-lrr disease resistance protein homologue	3789	0	2	0.001	0.0534341	5.73969	Up	0.342736	0.45418
MLOC_63510.1	Uncharacterized protein	subtilisin-like protease-like	2226	7	465	0.397747	21.1466	5.73243	Up	7.09e-107	3.47e-105
MLOC_60551.2	Uncharacterized protein	atp-dependent zinc metalloprotease ftsh mitochondrial-like	1962	0	1	0.001	0.0515957	5.68918	Up	0.617044	0.706247
AK368384	Hordeum vulgare subsp. vulgare mRNA for predicted protein, complete cds, clone: NIASHv2072O15	1738689 pap 25a associated domain containing expressed	2034	0	1	0.001	0.0497693	5.63719	Up	0.617044	0.703555
MLOC_10539.3	Uncharacterized protein	abc transporter a family member 7-like	2055	0	1	0.001	0.0492608	5.62237	Up	0.617044	0.713313
AK357261	Hordeum vulgare subsp. vulgare mRNA for predicted protein, complete cds, clone: NIASHv1049H08	pentatricopeptide repeat-containing protein at2g27610-like	2073	0	1	0.001	0.048833	5.60979	Up	0.617044	0.704843
MLOC_54134.2	Uncharacterized protein	probable o-methyltransferase 2-like	1125	4	240	0.449719	21.5959	5.58559	Up	3.36e-55	8.92e-54
MLOC_14578.3	Uncharacterized protein	calcium binding egf domain containing expressed	2775	2	120	0.0911593	4.37755	5.58559	Up	3.83e-28	5.56e-27
MLOC_10111.8	Uncharacterized protein	2518479 potassium channel protein kat1	2136	0	1	0.001	0.0473927	5.56659	Up	0.617044	0.71158
AK367001	Hordeum vulgare subsp. vulgare mRNA for predicted protein, complete cds, clone: NIASHv2049L18	2607000 protein	1296	2	118	0.195191	9.21701	5.56134	Up	1.2e-27	1.71e-26
MLOC_7470.1	Uncharacterized protein	113656 wrky dna-binding protein 49	690	2	116	0.366619	17.0185	5.53668	Up	3.76e-27	5.29e-26
MLOC_64099.1	Uncharacterized protein	probable pectinesterase 29-like	1020	10	579	1.24003	57.4634	5.53419	Up	6.28e-131	3.62e-129
AK362522	Hordeum vulgare subsp. vulgare mRNA for predicted protein, complete cds, clone: NIASHv2006M14	avr9 cf-9 rapidly elicited protein 141	2256	0	1	0.001	0.0448718	5.48774	Up	0.617044	0.712069
MLOC_54841.1	Uncharacterized protein	wall-associated receptor kinase 5-like	2292	0	1	0.001	0.044167	5.4649	Up	0.617044	0.707396
MLOC_10988.2	Cytosine-specific methyltransferase (EC 2.1.1.37)	cytosine-5 dna methyltransferase	4587	0	2	0.001	0.0441382	5.46395	Up	0.342736	0.45049
AK251417.1	-	2597604 histone h4	309	1	55	0.409332	18.0184	5.46006	Up	2.6e-13	1.98e-12
MLOC_58108.2	Uncharacterized protein	probable phenylalanyl-trna synthetase alpha chain-like	1548	1	54	0.0817077	3.53131	5.43359	Up	4.59e-13	3.45e-12
MLOC_71329.3	Uncharacterized protein	cell division control protein 6 homolog	1377	2	107	0.183709	7.86616	5.42017	Up	6.4e-25	8.42e-24
MLOC_76088.1	Uncharacterized protein	nbs-lrr disease resistance protein homologue	2370	0	1	0.001	0.0427134	5.41662	Up	0.617044	0.702637
MLOC_63282.1	Predicted protein (Uncharacterized protein)	2675341 subtilisin-like serine protease	2232	35	1767	1.98339	80.1411	5.3365	Up	0	0
MLOC_50352.3	Uncharacterized protein	1180356 os04g0165900	2562	0	1	0.001	0.0395124	5.30423	Up	0.617044	0.711806
AK253133.1	-	probable aldehyde oxidase 2-like	4023	32	1555	1.00608	39.1285	5.2814	Up	0	0
MLOC_15707.1	Predicted protein (Uncharacterized protein)	2581189 protein	492	1	48	0.25708	9.87618	5.26366	Up	1.4e-11	9.51e-11
MLOC_80724.3	Uncharacterized protein	1848358 partial	2046	2	94	0.12364	4.65088	5.23329	Up	1.04e-21	1.21e-20
AK374044	Hordeum vulgare subsp. vulgare mRNA for predicted protein, complete cds, clone: NIASHv3051P11	bifunctional pyrimidine biosynthesis protein	5520	0	2	0.001	0.0366778	5.19684	Up	0.342736	0.452916
AK374445	Hordeum vulgare subsp. vulgare mRNA for predicted protein, complete cds, clone: NIASHv3064M13	proline-rich protein	651	3	137	0.582873	21.3036	5.19177	Up	4.76e-31	7.53e-30
AK358828	Hordeum vulgare subsp. vulgare mRNA for predicted protein, complete cds, clone: NIASHv1083N18	slt1 protein	1611	4	178	0.31405	11.185	5.15443	Up	7.1e-40	1.41e-38
MLOC_78979.1	Uncharacterized protein	1076862 lgc1	351	28	1221	10.0898	352.145	5.12519	Up	3.21e-265	3.44e-263
MLOC_10310.1	Uncharacterized protein	1849331 partial	1260	2	86	0.200767	6.90941	5.10497	Up	9.68e-20	1.03e-18
MLOC_63244.2	Uncharacterized protein	nbs-lrr disease resistance protein	2964	0	1	0.001	0.0341535	5.09396	Up	0.617044	0.711731
MLOC_68625.2	Uncharacterized protein	cytochrome p450	1584	6	253	0.479104	16.1688	5.07673	Up	8.87e-56	2.37e-54
AK376256	Hordeum vulgare subsp. vulgare mRNA for predicted protein, complete cds, clone: NIASHv3119F02	58606 ternary complex factor	1812	2	84	0.139606	4.69282	5.07102	Up	3e-19	3.14e-18
MLOC_81737.1	Uncharacterized protein	2840914 os08g0142900	558	26	1083	5.89349	196.475	5.05908	Up	6.28e-234	6.02e-232
MLOC_10906.1	Uncharacterized protein	white-brown-complex abc transporter family	2382	5	206	0.265498	8.75464	5.04327	Up	1.69e-45	3.78e-44
AK353625	Hordeum vulgare subsp. vulgare mRNA for predicted protein, complete cds, clone: NIASHv1001J07	protein iq-domain 1-like	1452	2	82	0.17422	5.71689	5.03625	Up	9.29e-19	9.54e-18
MLOC_55612.1	Uncharacterized protein	protein	1536	6	243	0.494076	16.015	5.01855	Up	2.51e-53	6.42e-52
MLOC_70.2	Uncharacterized protein	pollen allergen-like protein	462	65	2615	17.7953	572.984	5.00893	Up	0	0
MLOC_43244.1	Histone H2A	histone h2a	456	3	120	0.832128	26.6397	5.00063	Up	7.11e-27	9.92e-26
AK357927	Hordeum vulgare subsp. vulgare mRNA for predicted protein, partial cds, clone: NIASHv1065C04	receptor kinase	3303	0	1	0.001	0.0306482	4.93773	Up	0.617044	0.711956
AK375321	Hordeum vulgare subsp. vulgare mRNA for predicted protein, complete cds, clone: NIASHv3090P05	low quality protein: fbd-associated f-box protein at3g50710-like	1530	2	75	0.165338	4.9623	4.90752	Up	4.8e-17	4.56e-16
MLOC_2259.1	Predicted protein (Uncharacterized protein)	ser thr-rich protein t10 in dgcr region	798	6	223	0.951003	28.2888	4.89464	Up	1.94e-48	4.56e-47
MLOC_37146.1	Uncharacterized protein	leucoanthocyanidin dioxygenase	1098	2	74	0.230389	6.82248	4.88815	Up	8.43e-17	7.9e-16
MLOC_26912.5	Predicted protein (Uncharacterized protein)	714514 pectinacetylesterase precursor	1365	6	222	0.555971	16.4639	4.88815	Up	3.4e-48	7.95e-47
MLOC_80000.1	Predicted protein (Uncharacterized protein)	mannan synthase 1-like	1611	12	439	0.942149	27.5856	4.87181	Up	7.1e-94	3.04e-92
MLOC_62188.1	Predicted protein (Uncharacterized protein)	2245459 5a2 protein	318	11	396	4.37521	126.061	4.84863	Up	1.33e-84	5.21e-83
MLOC_6531.1	Uncharacterized protein	predicted protein	234	6	211	3.24317	91.2808	4.81484	Up	1.63e-45	3.66e-44
MLOC_53016.1	Uncharacterized protein	protein lurp-one-related 11-like	627	1	34	0.201728	5.48939	4.76616	Up	3.82e-08	1.93e-07
MLOC_19160.1	Uncharacterized protein	2441881 defensin	228	51	1724	28.2924	765.447	4.75782	Up	0	0
MLOC_6028.2	Uncharacterized protein	far-red impaired response	333	2	67	0.75966	20.3678	4.74479	Up	4.28e-15	3.63e-14
AK370706	Hordeum vulgare subsp. vulgare mRNA for predicted protein, complete cds, clone: NIASHv2115F22	cell division protein aaa atpase family	1554	5	156	0.406961	10.1622	4.64217	Up	2.56e-33	4.3e-32
AK359780	Hordeum vulgare subsp. vulgare mRNA for predicted protein, partial cds, clone: NIASHv1103A19	heat shock 70 kda mitochondrial-like	2022	4	124	0.250215	6.20802	4.6329	Up	1.08e-26	1.49e-25
AK371010	Hordeum vulgare subsp. vulgare mRNA for predicted protein, partial cds, clone: NIASHv2122C14	udp-glycosyltransferase 76f1-like	498	2	60	0.507966	12.1965	4.58559	Up	2.13e-13	1.63e-12
MLOC_72933.1	Uncharacterized protein	725763 os12g0158700	462	1	29	0.273774	6.35432	4.53668	Up	6.26e-07	2.79e-06
AK353701	Hordeum vulgare subsp. vulgare mRNA for predicted protein, complete cds, clone: NIASHv1002C17	transferase family protein	1059	5	143	0.597183	13.6695	4.51664	Up	3.51e-30	5.43e-29
AK370280	Hordeum vulgare subsp. vulgare mRNA for predicted protein, complete cds, clone: NIASHv2108B12	udp-glycosyltransferase 82a1-like	1518	2	56	0.166645	3.73447	4.48606	Up	1.97e-12	1.42e-11
AK354089	Hordeum vulgare subsp. vulgare mRNA for predicted protein, complete cds, clone: NIASHv1004P04	xylanase inhibitor	990	1	28	0.127761	2.86309	4.48606	Up	1.09e-06	4.74e-06
MLOC_16701.1	Uncharacterized protein	expansine partial	795	1	28	0.159099	3.56536	4.48606	Up	1.09e-06	4.74e-06
MLOC_4958.1	Predicted protein (Uncharacterized protein)	subtilisin-like protease sdd1-like	2235	16	443	0.905474	20.065	4.46986	Up	3.01e-90	1.24e-88
MLOC_64684.2	Predicted protein (Uncharacterized protein)	2421641 defensin	267	33	905	15.6328	343.123	4.45608	Up	1.83e-182	1.45e-180
AK361923	Hordeum vulgare subsp. vulgare mRNA for predicted protein, complete cds, clone: NIASHv2001E23	asparagine synthetase	1425	3	82	0.266281	5.82521	4.45129	Up	1.2e-17	1.18e-16
AK362834	Hordeum vulgare subsp. vulgare mRNA for predicted protein, complete cds, clone: NIASHv2010H06	primary amine oxidase	2109	2	54	0.119946	2.59197	4.43359	Up	5.95e-12	4.15e-11
MLOC_21843.1	Uncharacterized protein	1849132 os04g0640300	594	2	54	0.42587	9.20281	4.43359	Up	5.95e-12	4.15e-11
AK248355.1	-	1909199 kda proline-rich protein	477	1	27	0.265164	5.73005	4.43359	Up	1.9e-06	8.04e-06
AK373094	Hordeum vulgare subsp. vulgare mRNA for predicted protein, complete cds, clone: NIASHv3020P23	1851322 os09g0498700	1392	18	480	1.63556	34.9072	4.41567	Up	6.06e-97	2.7e-95
MLOC_19148.1	Uncharacterized protein	glycerol-3-phosphate acyltransferase 6-like	1533	1	26	0.0825072	1.7169	4.37914	Up	3.31e-06	1.36e-05
MLOC_64651.2	Uncharacterized protein	61442 os06g0134300	1473	1	26	0.0858679	1.78683	4.37914	Up	3.31e-06	1.36e-05
AK355398	Hordeum vulgare subsp. vulgare mRNA for predicted protein, complete cds, clone: NIASHv1020D03	1634259 partial	927	1	26	0.136444	2.83927	4.37914	Up	3.31e-06	1.36e-05
MLOC_72638.2	Histone H2A	histone h2a	414	6	154	1.83309	37.6559	4.36052	Up	9.38e-32	1.51e-30
MLOC_61963.1	Predicted protein (Uncharacterized protein)	chemocyanin precursor	378	4	102	1.33845	27.3163	4.35113	Up	2.11e-21	2.42e-20
MLOC_79518.1	Uncharacterized protein	2879782 os09g0120100	1017	12	305	1.49243	30.3593	4.3464	Up	1.65e-61	4.84e-60
MLOC_68312.1	Uncharacterized protein	phytochrome p450	1542	5	127	0.410128	8.33743	4.34546	Up	2.42e-26	3.31e-25
AK371846	Hordeum vulgare subsp. vulgare mRNA for predicted protein, complete cds, clone: NIASHv2142F06	277826 phosphoinositide 4-kinase gamma 4	1707	6	150	0.444582	8.89551	4.32256	Up	8.46e-31	1.33e-29
MLOC_12145.8	S-acyltransferase (EC 2.3.1.225) (Palmitoyltransferase)	probable s-acyltransferase at3g56930-like	1395	1	25	0.0906691	1.81417	4.32256	Up	5.76e-06	2.29e-05
MLOC_4798.7	Uncharacterized protein	nb-arc domain containing protein	3510	6	148	0.216211	4.26842	4.30319	Up	2.54e-30	3.95e-29
MLOC_72690.1	Uncharacterized protein	1633935 os04g0348800	966	3	72	0.392806	7.54516	4.26366	Up	2.97e-15	2.55e-14
MLOC_8426.1	Uncharacterized protein (Fragment)	chloroplast envelope membrane protein	207	1	24	0.611031	11.7369	4.26366	Up	1e-05	3.86e-05
AK357139	Hordeum vulgare subsp. vulgare mRNA for predicted protein, complete cds, clone: NIASHv1046O11	1294580 o-methyltransferase zrp4	1107	31	736	3.54199	67.3043	4.24807	Up	3e-144	1.9e-142
MLOC_6156.2	Uncharacterized protein	myb-related protein hv33	909	7	164	0.97402	18.2639	4.2289	Up	4.15e-33	6.93e-32
MLOC_77571.1	Uncharacterized protein	protein	2067	1	23	0.0611918	1.12642	4.20226	Up	1.74e-05	6.48e-05
AK371118	Hordeum vulgare subsp. vulgare mRNA for predicted protein, complete cds, clone: NIASHv2125L11	2610409 protein	1893	2	46	0.133633	2.45992	4.20226	Up	4.88e-10	2.92e-09
MLOC_12555.1	Uncharacterized protein	2752619 vacuolar targeting receptor	1689	75	1691	5.61649	101.351	4.17354	Up	0	0
MLOC_38046.3	MLO-like protein	mlo-like protein 1-like	1467	1	22	0.0862191	1.51812	4.13813	Up	3.01e-05	0.000108498
MLOC_59790.1	Uncharacterized protein	aspartic proteinase nepenthesin-1-like	894	18	393	2.54665	44.5008	4.12716	Up	3e-76	1.07e-74
MLOC_63780.6	Uncharacterized protein	1849003 os04g0403400	3051	2	42	0.0829128	1.39354	4.07102	Up	4.33e-09	2.4e-08
MLOC_61922.1	Uncharacterized protein	aspartic proteinase nepenthesin-1-like	1539	14	294	1.1506	19.3384	4.07102	Up	7.2e-57	1.98e-55
MLOC_58693.2	Uncharacterized protein	2688500 protein kinase-like	1254	2	41	0.201728	3.30978	4.03625	Up	7.46e-09	4.06e-08
MLOC_59840.1	Predicted protein (Uncharacterized protein)	726287 ame: full=probable apyrase 3 short= 3 ame: full=atp-diphosphatase ame: full=atp-diphosphohydrolase ame: full=adenosine diphosphatase short=adpase flags: precursor	1392	2	40	0.181729	2.90893	4.00063	Up	1.28e-08	6.83e-08
MLOC_72783.2	MLO-like protein	835247 mlo-like protein 11	1827	1	20	0.0692301	1.10816	4.00063	Up	8.97e-05	0.000302186
MLOC_77989.1	Uncharacterized protein	PREDICTED: uncharacterized protein LOC100824735	237	7	139	3.7358	59.3717	3.99029	Up	3.31e-27	4.67e-26
MLOC_11868.1	Uncharacterized protein	rab gdp dissociation inhibitor alpha-like	1341	4	78	0.377281	5.88815	3.9641	Up	1.03e-15	9.04e-15
AK373961	Hordeum vulgare subsp. vulgare mRNA for predicted protein, complete cds, clone: NIASHv3049F20	2597604 histone h4	309	2	39	0.818663	12.7767	3.9641	Up	2.21e-08	1.15e-07
AK373440	Hordeum vulgare subsp. vulgare mRNA for predicted protein, complete cds, clone: NIASHv3030O05	histone -like isoform 1	453	6	116	1.67528	25.9223	3.95172	Up	9.3e-23	1.13e-21
AK252681.1	-	2576767 rnase s-like protein	735	14	269	2.40921	37.0491	3.94281	Up	5.24e-51	1.28e-49
MLOC_63142.3	Predicted protein (Uncharacterized protein)	1389898 s4 domain	915	1	19	0.138233	2.10206	3.92663	Up	0.000154575	0.000501829
AK249287.1	-	beta-expansin 4 precursor	861	5	95	0.734515	11.1695	3.92663	Up	8.99e-19	9.24e-18
AK358870	Hordeum vulgare subsp. vulgare mRNA for predicted protein, complete cds, clone: NIASHv1084M17	1326010 f-box domain containing expressed	1266	2	38	0.199816	3.03852	3.92663	Up	3.79e-08	1.92e-07
AK376314	Hordeum vulgare subsp. vulgare mRNA for predicted protein, complete cds, clone: NIASHv3120L13	gdsl esterase lipase at4g26790-like	1107	4	75	0.457031	6.85846	3.90752	Up	5.17e-15	4.37e-14
AK372497	Hordeum vulgare subsp. vulgare mRNA for predicted protein, complete cds, clone: NIASHv3003H24	dihydrolipoyl dehydrogenase mitochondrial-like	1506	4	74	0.335945	4.97416	3.88815	Up	8.85e-15	7.4e-14
MLOC_44106.1	Uncharacterized protein	retrotransposon unclassified	372	4	73	1.36004	19.8652	3.86852	Up	1.51e-14	1.25e-13
MLOC_43338.1	Uncharacterized protein	1023481 os03g0594700	1359	2	36	0.186142	2.68161	3.84863	Up	1.11e-07	5.39e-07
MLOC_5439.1	Uncharacterized protein	geranylgeranyl diphosphate synthase	942	4	70	0.537085	7.52246	3.80798	Up	7.55e-14	5.95e-13
AK374578	Hordeum vulgare subsp. vulgare mRNA for predicted protein, complete cds, clone: NIASHv3069J06	cytochrome p450 superfamily protein	1557	20	347	1.62471	22.5608	3.79556	Up	1.35e-63	4.13e-62
AK374425	Hordeum vulgare subsp. vulgare mRNA for predicted protein, complete cds, clone: NIASHv3064F05	two-component response regulator arr2-like	750	4	69	0.674578	9.31324	3.78722	Up	1.29e-13	1e-12
AK374533	Hordeum vulgare subsp. vulgare mRNA for predicted protein, complete cds, clone: NIASHv3068E10	predicted protein	603	1	17	0.209757	2.85394	3.76616	Up	0.000455982	0.00137033
AK250028.1	-	2798554 uv damaged dna binding protein 1	1611	4	68	0.31405	4.27293	3.76616	Up	2.2e-13	1.68e-12
MLOC_11567.1	Potassium transporter	2735884 potassium transporter	2400	6	102	0.316209	4.30231	3.76616	Up	1.68e-19	1.77e-18
AK374683	Hordeum vulgare subsp. vulgare mRNA for predicted protein, complete cds, clone: NIASHv3072J11	galactomannan galactosyltransferase 1-like	1281	110	1869	10.8612	147.697	3.76539	Up	0	0
MLOC_23395.1	Uncharacterized protein	2868783 coiled-coil protein	1851	5	84	0.341663	4.59394	3.74909	Up	3.24e-16	2.94e-15
MLOC_72134.2	Uncharacterized protein	myosin-j heavy chain-like	3264	3	50	0.116253	1.55072	3.73759	Up	4.44e-10	2.67e-09
MLOC_55596.1	Uncharacterized protein	1322781 os05g0441400	795	6	99	0.954592	12.6061	3.72309	Up	8.28e-19	8.53e-18
MLOC_59075.1	Uncharacterized protein	65-kda microtubule-associated protein 3-like	2052	4	66	0.246556	3.25596	3.72309	Up	6.37e-13	4.74e-12
AK367736	Hordeum vulgare subsp. vulgare mRNA for predicted protein, complete cds, clone: NIASHv2061G15	tyrosine dopa decarboxylase 3-like	1587	5	82	0.398499	5.23058	3.71432	Up	9.38e-16	8.27e-15
MLOC_51763.4	Uncharacterized protein	protein dyad-like	2154	6	97	0.352322	4.55868	3.69365	Up	2.39e-18	2.41e-17
AK376784	Hordeum vulgare subsp. vulgare mRNA for predicted protein, complete cds, clone: NIASHv3136A14	2558903 histone h3	408	83	1334	25.7307	330.985	3.6852	Up	1.39e-234	1.34e-232
AK373554	Hordeum vulgare subsp. vulgare mRNA for predicted protein, complete cds, clone: NIASHv3034M02	probable serine protease do-like htra-like	1491	2	32	0.169663	2.17263	3.6787	Up	9.47e-07	4.13e-06
MLOC_45867.1	Uncharacterized protein (Fragment)	b3 domain-containing protein os08g0325100-like	645	1	16	0.196098	2.51115	3.6787	Up	0.000780384	0.00225314
AK355960	Hordeum vulgare subsp. vulgare mRNA for predicted protein, complete cds, clone: NIASHv1028F08	2246575 zinc finger protein	900	2	32	0.281074	3.59932	3.6787	Up	9.47e-07	4.13e-06
MLOC_7035.1	Uncharacterized protein	tryptophan aminotransferase-related protein 2-like	1311	1	16	0.0964786	1.23546	3.6787	Up	0.000780384	0.00225343
AK361391	Hordeum vulgare subsp. vulgare mRNA for predicted protein, complete cds, clone: NIASHv1139J22	serine threonine protein	1134	1	16	0.111537	1.4283	3.6787	Up	0.000780384	0.00225284
MLOC_55015.1	Uncharacterized protein	2621733 osr40c1	1284	25	399	2.46268	31.4573	3.67509	Up	3.96e-71	1.32e-69
MLOC_65695.1	Uncharacterized protein	protein far1-related sequence 5-like	591	6	95	1.2841	16.2723	3.66359	Up	6.89e-18	6.83e-17
AK374175	Hordeum vulgare subsp. vulgare mRNA for predicted protein, complete cds, clone: NIASHv3056N10	protein nsp-interacting kinase 3-like	1866	4	63	0.271133	3.41776	3.65598	Up	3.12e-12	2.22e-11
AK248255.1	-	nas6_horvu ame: full=probable nicotianamine synthase 6 ame: full= 6 ame: full=s-adenosyl-l-methionine:s-adenosyl-l-methionine:s-adenosyl-methionine 3-amino-3-carboxypropyltransferase 6	990	4	63	0.511044	6.44196	3.65598	Up	3.12e-12	2.22e-11
MLOC_61812.1	Uncharacterized protein	probable polygalacturonase-like	1464	127	1990	10.9723	137.602	3.64857	Up	0	0
AK369118	Hordeum vulgare subsp. vulgare mRNA for predicted protein, complete cds, clone: NIASHv2085I17	720699 monocopper oxidase-like protein sku5	1791	2	31	0.141243	1.75218	3.6329	Up	1.61e-06	6.85e-06
MLOC_10500.1	Predicted protein (Uncharacterized protein)	btb poz domain-containing protein at2g46260-like	1485	14	217	1.19244	14.7927	3.6329	Up	5.53e-39	1.07e-37
MLOC_36530.1	Uncharacterized protein	cysteine proteinase inhibitor 8-like	372	206	3182	70.0419	865.905	3.62792	Up	0	0
AK374553	Hordeum vulgare subsp. vulgare mRNA for predicted protein, complete cds, clone: NIASHv3068M23	2245459 5a2 protein	321	425	6530	167.463	2059.31	3.62025	Up	0	0
AK374273	Hordeum vulgare subsp. vulgare mRNA for predicted protein, complete cds, clone: NIASHv3059C22	acetyl-coenzyme a synthetase-like	2184	4	61	0.231655	2.82742	3.60944	Up	8.98e-12	6.19e-11
MLOC_12389.2	Uncharacterized protein	2163746 nbs-lrr class disease resistance protein	2994	2	30	0.0844913	1.01434	3.58559	Up	2.74e-06	1.13e-05
MLOC_51647.1	Uncharacterized protein	hypothetical protein SORBIDRAFT_01g012976	1143	2	30	0.221318	2.65698	3.58559	Up	2.74e-06	1.13e-05
MLOC_70261.1	Uncharacterized protein	724232 os11g0118800	1395	1	15	0.0906691	1.0885	3.58559	Up	0.00133198	0.00368305
AK355654	Hordeum vulgare subsp. vulgare mRNA for predicted protein, complete cds, clone: NIASHv1023O20	eukaryotic translation elongation factor 2	2526	1	15	0.0500726	0.601133	3.58559	Up	0.00133198	0.00368352
AK373740	Hordeum vulgare subsp. vulgare mRNA for predicted protein, complete cds, clone: NIASHv3042H17	2751494 os04g0683800	3048	2	30	0.0829944	0.996367	3.58559	Up	2.74e-06	1.13e-05
MLOC_11141.1	Uncharacterized protein	subtilase family protein	2472	45	669	2.30249	27.3962	3.57271	Up	1.44e-115	7.52e-114
MLOC_69251.1	Pectinesterase (EC 3.1.1.11)	pectinesterase qrt1-like	1092	6	89	0.694964	8.2505	3.56947	Up	1.62e-16	1.5e-15
MLOC_69028.2	Sulfotransferase (EC 2.8.2.-)	sulfotransferase 17-like	966	2	29	0.261871	3.03902	3.53668	Up	4.64e-06	1.87e-05
AK368373	Hordeum vulgare subsp. vulgare mRNA for predicted protein, complete cds, clone: NIASHv2072N10	predicted protein	849	28	397	4.17142	47.3365	3.50434	Up	3.94e-68	1.27e-66
MLOC_10816.2	Uncharacterized protein	12-oxophytodienoate reductase	1131	29	407	3.24317	36.4288	3.4896	Up	1.45e-69	4.73e-68
MLOC_76983.1	Uncharacterized protein	kinetochore protein	525	38	533	9.15499	102.773	3.48876	Up	1.31e-90	5.43e-89
MLOC_52357.1	Uncharacterized protein	cytokinin oxidase partial	1227	8	112	0.824668	9.24031	3.48606	Up	4.19e-20	4.55e-19
MLOC_53783.1	Trehalose 6-phosphate phosphatase (EC 3.1.3.12)	trehalose-phosphate phosphatase-like	1113	2	28	0.227284	2.54669	3.48606	Up	7.85e-06	3.08e-05
MLOC_71287.2	Alpha-1,4 glucan phosphorylase (EC 2.4.1.1)	alpha- glucan phosphorylase l chloroplastic amyloplastic-like	2571	298	4139	14.6605	162.969	3.4746	Up	0	0
MLOC_9823.2	Uncharacterized protein	rad3-like dna-binding helicase protein	2652	4	55	0.190774	2.09943	3.46006	Up	2.09e-10	1.29e-09
MLOC_77667.1	Predicted protein (Uncharacterized protein)	high mobility group b protein 7-like	645	41	560	8.04003	87.8904	3.45043	Up	3.06e-94	1.31e-92
AK365106	Hordeum vulgare subsp. vulgare mRNA for predicted protein, complete cds, clone: NIASHv2030P07	cral trio domain sec14p-like phosphatidylinositol transfer family protein	1890	5	68	0.334612	3.64217	3.44424	Up	1.47e-12	1.07e-11
MLOC_68429.1	Uncharacterized protein	cytochrome p450 77a3-like	1608	62	843	4.87685	53.0707	3.44389	Up	8.12e-141	5.03e-139
MLOC_24777.1	Uncharacterized protein	zinc finger mym-type protein 1-like	843	2	27	0.300079	3.24227	3.43359	Up	1.33e-05	5.03e-05
MLOC_63464.1	Uncharacterized protein	integral membrane hpp family protein	717	2	27	0.352813	3.81204	3.43359	Up	1.33e-05	5.03e-05
AK376689	Hordeum vulgare subsp. vulgare mRNA for predicted protein, complete cds, clone: NIASHv3131M04	2432328 gdsl esterase lipase	1080	32	423	3.74766	39.6488	3.40321	Up	9.75e-71	3.22e-69
MLOC_4896.1	Uncharacterized protein	827841 os07g0689900	4458	6	79	0.170233	1.79391	3.39752	Up	2.98e-14	2.41e-13
MLOC_761.1	Uncharacterized protein	lipid-transfer protein dir1-like	309	18	235	7.36797	76.9879	3.38529	Up	9.02e-40	1.79e-38
AK376505	Hordeum vulgare subsp. vulgare mRNA for predicted protein, partial cds, clone: NIASHv3126D05	840041 os04g0105200	378	4	52	1.33845	13.9259	3.37914	Up	9.92e-10	5.8e-09
MLOC_4908.1	Hexosyltransferase (EC 2.4.1.-)	probable galacturonosyltransferase 7-like	1941	2	26	0.130328	1.356	3.37914	Up	2.24e-05	8.23e-05
MLOC_15553.1	Uncharacterized protein	pentatricopeptide repeat-containing protein mitochondrial-like	2070	1	13	0.0611031	0.635749	3.37914	Up	0.00384414	0.00964724
MLOC_33580.1	Uncharacterized protein (Fragment)	af380387_1 non-ltr retroelement reverse transcriptase	201	1	13	0.629271	6.54727	3.37914	Up	0.00384414	0.00964835
MLOC_44567.1	Uncharacterized protein (Fragment)	hypothetical protein ZEAMMB73_219630	186	1	13	0.680019	7.07527	3.37914	Up	0.00384414	0.00964946
MLOC_64484.3	Uncharacterized protein	2880196 cyclin-like protein	2952	10	129	0.428467	4.42371	3.368	Up	2.43e-22	2.88e-21
MLOC_52668.5	Histone-lysine N-methyltransferase (EC 2.1.1.43)	1675689 set domain containing expressed	1269	9	116	0.897046	9.25357	3.36676	Up	3.27e-20	3.57e-19
MLOC_67418.1	Predicted protein (Uncharacterized protein)	faciata 1-like protein	2931	54	695	2.3303	24.0039	3.36468	Up	4.42e-114	2.29e-112
MLOC_75889.3	Predicted protein (Uncharacterized protein)	probable polygalacturonase-like	1134	126	1614	14.0537	144.08	3.35785	Up	3.43e-262	3.62e-260
MLOC_66225.1	Uncharacterized protein	1636115 os08g0541700	543	201	2557	46.8198	476.699	3.34789	Up	0	0
MLOC_54335.1	Uncharacterized protein	nitrate transporter -like	1797	95	1205	6.68666	67.8816	3.34366	Up	1.79e-195	1.5e-193
MLOC_63913.2	Uncharacterized protein	disease resistance zinc finger chromosome condensation-like region protein	1143	3	38	0.331978	3.36551	3.34167	Up	2.44e-07	1.14e-06
MLOC_33876.4	Uncharacterized protein	replication protein a 70 kda dna-binding subunit-like	1866	37	467	2.50798	25.3348	3.33653	Up	1.28e-76	4.62e-75
AK368788	Hordeum vulgare subsp. vulgare mRNA for predicted protein, complete cds, clone: NIASHv2079N05	cysteine proteinase	1101	18	226	2.06785	20.7794	3.32895	Up	9.19e-38	1.73e-36
MLOC_12627.1	Uncharacterized protein	1631862 os02g0243900	642	2	25	0.394029	3.94201	3.32256	Up	3.76e-05	0.000134087
MLOC_293.2	Uncharacterized protein	probable auxin efflux carrier component 1c-like isoform 2	2289	6	75	0.331542	3.31687	3.32256	Up	2.34e-13	1.79e-12
MLOC_72852.1	MATE efflux family protein	mate efflux family protein	1521	2	25	0.166316	1.66389	3.32256	Up	3.76e-05	0.000134108
MLOC_59648.1	Uncharacterized protein	1848358 partial	2025	2	25	0.124922	1.24976	3.32256	Up	3.76e-05	0.00013413
MLOC_54751.1	Uncharacterized protein	strictosidine synthase 3-like	1122	2	25	0.225461	2.25559	3.32256	Up	3.76e-05	0.000134152
MLOC_37138.2	Uncharacterized protein	cyclopropane fatty acid synthase	2391	5	62	0.264499	2.62497	3.31097	Up	3.27e-11	2.16e-10
AK374620	Hordeum vulgare subsp. vulgare mRNA for predicted protein, complete cds, clone: NIASHv3070M24	histone h2a	417	16	198	4.85308	48.0664	3.30806	Up	4.44e-33	7.39e-32
AK372405	Hordeum vulgare subsp. vulgare mRNA for predicted protein, complete cds, clone: NIASHv3001H01	2848202 alpha-amylase	1281	9	111	0.888643	8.77176	3.30319	Up	4.27e-19	4.44e-18
AK253087.1	-	probable dna primase large subunit-like	1389	6	74	0.546365	5.39315	3.30319	Up	3.91e-13	2.95e-12
MLOC_73232.1	Uncharacterized protein	protein	1695	11	134	0.820837	8.00291	3.28536	Up	1.1e-22	1.33e-21
AK251852.1	-	852947 fusion protein of histone 2a and enhanced yellow fluorescence protein	444	35	426	9.97054	97.1269	3.28413	Up	4.59e-69	1.49e-67
MLOC_66071.3	Uncharacterized protein	calmodulin-binding expressed	1764	12	145	0.860432	8.32113	3.27365	Up	2.28e-24	2.95e-23
AK368806	Hordeum vulgare subsp. vulgare mRNA for predicted protein, complete cds, clone: NIASHv2080E11	protein downstream neighbor of son homolog	1887	2	24	0.134058	1.28751	3.26366	Up	6.31e-05	0.000217081
AK367545	Hordeum vulgare subsp. vulgare mRNA for predicted protein, partial cds, clone: NIASHv2058L09	wound-induced protein wi12 containing protein	303	4	48	1.66975	16.0366	3.26366	Up	7.79e-09	4.22e-08
MLOC_7925.1	Uncharacterized protein	wuschel homeobox protein	510	1	12	0.248007	2.3819	3.26366	Up	0.00649488	0.0155592
MLOC_33486.1	Uncharacterized protein	hyoscyamine 6-dioxygenase	1017	1	12	0.124369	1.19446	3.26366	Up	0.00649488	0.0155575
MLOC_71615.2	Uncharacterized protein	serine threonine protein	1137	1	12	0.111243	1.0684	3.26366	Up	0.00649488	0.0155541
MLOC_9998.3	Uncharacterized protein	cct motif family protein	594	1	12	0.212935	2.04507	3.26366	Up	0.00649488	0.0155507
AK363488	Hordeum vulgare subsp. vulgare mRNA for predicted protein, complete cds, clone: NIASHv2015O18	l-gulonolactone oxidase-like	1794	1	12	0.0705036	0.677129	3.26366	Up	0.00649488	0.0155558
MLOC_14956.3	Predicted protein (Uncharacterized protein)	anthocyanidin 3-o-glucosyltransferase	1425	1	12	0.0887603	0.85247	3.26366	Up	0.00649488	0.0155524
MLOC_33441.1	Uncharacterized protein	2890359 os02g0170900	615	2	24	0.411328	3.95047	3.26366	Up	6.31e-05	0.000217047
AK248534.1	-	852947 fusion protein of histone 2a and enhanced yellow fluorescence protein	444	37	443	10.5403	101.003	3.26041	Up	2.67e-71	8.92e-70
AK369538	Hordeum vulgare subsp. vulgare mRNA for predicted protein, complete cds, clone: NIASHv2093B02	histone h2a	465	181	2152	49.2333	468.492	3.25032	Up	0	0
MLOC_36749.1	Uncharacterized protein	wd repeat and hmg-box dna-binding protein 1-like	3030	44	522	1.83672	17.4398	3.24717	Up	1.97e-83	7.59e-82
MLOC_11224.3	Uncharacterized protein	gdsl esterase lipase at1g71691-like	1104	14	166	1.60396	15.2213	3.24638	Up	1.65e-27	2.34e-26
MLOC_4084.1	Uncharacterized protein	subtilisin-like protease-like	2313	26	307	1.42178	13.4362	3.24036	Up	1.33e-49	3.16e-48
MLOC_58264.2	Uncharacterized protein	transmembrane bax inhibitor motif-containing protein 4	717	3	35	0.52922	4.94153	3.22302	Up	1.14e-06	4.94e-06
MLOC_64906.1	Histone H2A	2546731 histone z	417	50	580	15.1659	140.801	3.21475	Up	1.09e-91	4.57e-90
MLOC_57148.1	Predicted protein (Uncharacterized protein)	selt selw selh selenoprotein domain containing protein	576	13	150	2.85466	26.3622	3.20708	Up	1e-24	1.31e-23
MLOC_17320.1	Uncharacterized protein	cell division control protein 45 homolog	1248	2	23	0.202698	1.86563	3.20226	Up	0.000105552	0.000350973
MLOC_70149.2	Uncharacterized protein	2490406 os03g0439500	1047	2	23	0.241611	2.22379	3.20226	Up	0.000105552	0.00035108
AK364995	Hordeum vulgare subsp. vulgare mRNA for predicted protein, complete cds, clone: NIASHv2030C04	transcription factor bhlh123-like	999	2	23	0.25322	2.33064	3.20226	Up	0.000105552	0.000351027
AK375145	Hordeum vulgare subsp. vulgare mRNA for predicted protein, complete cds, clone: NIASHv3086G24	udp-glucose 6-dehydrogenase-like	1440	12	138	1.05403	9.70129	3.20226	Up	7.99e-23	9.72e-22
MLOC_62978.1	Uncharacterized protein	cation h(+) antiporter 19-like	2442	2	23	0.10359	0.953444	3.20226	Up	0.000105552	0.00035092
MLOC_51984.1	Uncharacterized protein	medium-chain-fatty-acid-- ligase-like	1977	23	262	1.47148	13.4155	3.18856	Up	6.07e-42	1.26e-40
MLOC_5608.1	Predicted protein (Uncharacterized protein)	leucine-rich repeat family protein	1272	20	226	1.98873	17.986	3.17695	Up	2.94e-36	5.31e-35
AK356729	Hordeum vulgare subsp. vulgare mRNA for predicted protein, complete cds, clone: NIASHv1039B20	glucan endo- -beta-glucosidase 3 precursor	507	33	371	8.23265	74.0762	3.16958	Up	1.84e-58	5.18e-57
AK371893	Hordeum vulgare subsp. vulgare mRNA for predicted protein, complete cds, clone: NIASHv2142N21	resistance-related receptor-like kinase	1890	17	190	1.13768	10.1766	3.16109	Up	1.44e-30	2.24e-29
MLOC_58410.4	Uncharacterized protein	protein breast cancer susceptibility 1 homolog	1863	10	111	0.678924	6.03147	3.15119	Up	2.34e-18	2.37e-17
AK361194	Hordeum vulgare subsp. vulgare mRNA for predicted protein, complete cds, clone: NIASHv1134N11	protein	915	1	11	0.138233	1.21698	3.13813	Up	0.0109263	0.0247214
MLOC_51302.1	Uncharacterized protein	2607290 protein	972	2	22	0.260254	2.29123	3.13813	Up	0.000176138	0.000566694
MLOC_75759.1	Uncharacterized protein	1262834 cytochrome c biogenesis b	648	2	22	0.390381	3.43685	3.13813	Up	0.000176138	0.000566611
MLOC_36829.1	Uncharacterized protein	50605 membrane	1299	2	22	0.19474	1.71446	3.13813	Up	0.000176138	0.000566861
AK374002	Hordeum vulgare subsp. vulgare mRNA for predicted protein, complete cds, clone: NIASHv3050K05	protein	1158	1	11	0.109226	0.961606	3.13813	Up	0.0109263	0.0247239
MLOC_21867.4	Uncharacterized protein	protein tas-like	651	3	33	0.582873	5.13152	3.13813	Up	3.16e-06	1.3e-05
MLOC_5705.1	Uncharacterized protein	probable cytokinin riboside 5 -monophosphate phosphoribohydrolase logl6-like	744	1	11	0.170005	1.49669	3.13813	Up	0.0109263	0.0247316
MLOC_18400.3	Uncharacterized protein	nbs-lrr disease resistance protein homologue	1161	2	22	0.217887	1.91824	3.13813	Up	0.000176138	0.000566778
MLOC_75604.1	Predicted protein (Uncharacterized protein)	728558 thaumatin-like cytokinin-binding expressed	720	1	11	0.175671	1.54658	3.13813	Up	0.0109263	0.0247188
MLOC_36472.3	Laccase (EC 1.10.3.2) (Benzenediol:oxygen oxidoreductase) (Diphenol oxidase) (Urishiol oxidase)	laccase family protein	1902	2	22	0.133	1.17091	3.13813	Up	0.000176138	0.000566527
MLOC_78302.1	Uncharacterized protein	protein far1-related sequence 5-like	504	1	11	0.250959	2.2094	3.13813	Up	0.0109263	0.0247265
MLOC_15384.1	Uncharacterized protein	tpa: phosphatidylinositol-4-phosphate 5-kinase family protein	1149	1	11	0.110081	0.969138	3.13813	Up	0.0109263	0.024729
AK365895	Hordeum vulgare subsp. vulgare mRNA for predicted protein, partial cds, clone: NIASHv2038K15	protein kinase domain containing protein	1560	15	163	1.21619	10.5773	3.12054	Up	4.05e-26	5.51e-25
AK360173	Hordeum vulgare subsp. vulgare mRNA for predicted protein, complete cds, clone: NIASHv1112C08	aspartic proteinase nepenthesin-2-like	1419	87	945	7.7548	67.4159	3.11993	Up	2.75e-144	1.75e-142
MLOC_10176.1	Uncharacterized protein	2569710 protein zx	1200	12639	137150	1332.19	11569.8	3.1185	Up	0	0
MLOC_12747.2	Uncharacterized protein	ethylene-responsive transcription factor win1-like	618	6	65	1.22799	10.6473	3.11611	Up	3.79e-11	2.48e-10
MLOC_58020.1	Uncharacterized protein	27k protein	630	22	237	4.41688	38.0821	3.10801	Up	3.27e-37	6.05e-36
MLOC_53891.1	Uncharacterized protein	kinesin heavy chain isoform	753	8	86	1.34378	11.5616	3.10497	Up	2.54e-14	2.06e-13
MLOC_78778.1	Uncharacterized protein	udp-glycosyltransferase 76f1-like	942	18	192	2.41688	20.633	3.09374	Up	2.75e-30	4.28e-29
AK374758	Hordeum vulgare subsp. vulgare mRNA for predicted protein, partial cds, clone: NIASHv3075I13	2251736 harpin-induced protein	387	6	64	1.96098	16.741	3.09374	Up	6.27e-11	4.04e-10
MLOC_38213.1	Uncharacterized protein	725786 os12g0577200	456	3	32	0.832128	7.10392	3.09374	Up	5.25e-06	2.1e-05
AK369331	Hordeum vulgare subsp. vulgare mRNA for predicted protein, complete cds, clone: NIASHv2089D09	2607231 protein	432	3	32	0.878357	7.49858	3.09374	Up	5.25e-06	2.1e-05
MLOC_7202.1	Uncharacterized protein (Fragment)	pyruvate decarboxylase isozyme 2-like	1572	651	6930	52.3796	446.266	3.09083	Up	0	0
AK249420.1	-	2597604 histone h4	309	16	170	6.54931	55.6934	3.08809	Up	6.27e-27	8.76e-26
MLOC_77655.1	Uncharacterized protein (Fragment)	hypothetical protein SORBIDRAFT_05g008100	294	5	53	2.15108	18.2491	3.08469	Up	3.18e-09	1.78e-08
MLOC_68873.2	Predicted protein (Uncharacterized protein)	threonine endopeptidase	513	7	74	1.7259	14.6025	3.0808	Up	2.07e-12	1.49e-11
MLOC_78929.1	Uncharacterized protein	1013268 expressed	750	2	21	0.337289	2.83446	3.07102	Up	0.00029305	0.000906251
MLOC_31846.1	Uncharacterized protein	duf26 domain receptor-like protein kinase	1041	2	21	0.243004	2.04212	3.07102	Up	0.00029305	0.00090638
MLOC_79446.2	Uncharacterized protein	pathogen-related protein	780	4	42	0.648633	5.45089	3.07102	Up	1.64e-07	7.77e-07
AK250005.1	-	2576767 rnase s-like protein	738	7	73	1.19971	10.0134	3.06117	Up	3.42e-12	2.43e-11
MLOC_55372.2	Predicted protein (Uncharacterized protein)	adenine phosphoribosyltransferase 2	672	19	198	3.57617	29.8269	3.06013	Up	7e-31	1.1e-29
AK354862	Hordeum vulgare subsp. vulgare mRNA for predicted protein, complete cds, clone: NIASHv1012G13	cold shock protein-1 precursor	483	5	52	1.30935	10.8986	3.05721	Up	5.24e-09	2.89e-08
MLOC_16173.1	Uncharacterized protein	pre-mrna-splicing factor atp-dependent rna helicase prp16-like	3390	14	145	0.522351	4.32993	3.05125	Up	6.42e-23	7.85e-22
MLOC_4198.1	Uncharacterized protein	proline-rich receptor-like protein kinase perk4-like	1698	3	31	0.223469	1.84815	3.04793	Up	8.7e-06	3.38e-05
MLOC_25315.1	Uncharacterized protein		435	7	72	2.03537	16.7555	3.04127	Up	5.64e-12	3.95e-11
MLOC_61918.1	Pectinesterase (EC 3.1.1.11)	2770932 pectinesterase	1761	4	41	0.287299	2.35688	3.03625	Up	2.71e-07	1.25e-06
MLOC_68703.2	Uncharacterized protein	hypothetical protein ZEAMMB73_245490	396	24	246	7.66566	62.8858	3.03625	Up	9.47e-38	1.78e-36
MLOC_57973.1	Uncharacterized protein	422975 os10g0446100	1176	5	51	0.53777	4.39011	3.0292	Up	8.65e-09	4.67e-08
MLOC_73259.1	Predicted protein (Uncharacterized protein)	2613563 protein	1593	5	51	0.396998	3.24091	3.0292	Up	8.65e-09	4.66e-08
MLOC_4724.2	Uncharacterized protein	zinc-finger domain of monoamine-oxidase a repressor r1 protein	1572	6	61	0.482761	3.92817	3.02448	Up	2.81e-10	1.72e-09
AK377086	Hordeum vulgare subsp. vulgare mRNA for predicted protein, complete cds, clone: NIASHv3147P10	2597604 histone h4	309	130	1316	53.2131	431.132	3.01828	Up	5.47e-194	4.58e-192
MLOC_13217.3	Uncharacterized protein	abc transporter c family member 13-like	2106	48	482	2.88281	23.1687	3.00663	Up	7.6e-72	2.57e-70
AK374452	Hordeum vulgare subsp. vulgare mRNA for predicted protein, complete cds, clone: NIASHv3064O23	2245459 5a2 protein	321	44	441	17.3373	139.074	3.0039	Up	8.22e-66	2.57e-64
MLOC_63387.1	Uncharacterized protein	nadh-plastoquinone oxidoreductase subunit 7	513	2	20	0.493113	3.94662	3.00063	Up	0.000485994	0.00145412
AK372739	Hordeum vulgare subsp. vulgare mRNA for predicted protein, complete cds, clone: NIASHv3010O09	2829918 os02g0711400	420	4	40	1.2046	9.64103	3.00063	Up	4.46e-07	2.02e-06
MLOC_74413.1	Uncharacterized protein (Fragment)	probable glucuronosyltransferase os07g0694400-like	606	2	20	0.417437	3.34095	3.00063	Up	0.000485994	0.00145392
MLOC_17132.1	Uncharacterized protein	transposon en spm sub-class	642	2	20	0.394029	3.15361	3.00063	Up	0.000485994	0.00145352
MLOC_52137.1	Uncharacterized protein	f-box protein at5g07610-like	279	1	10	0.453346	3.62835	3.00063	Up	0.0182906	0.0390223
AK368155	Hordeum vulgare subsp. vulgare mRNA for predicted protein, complete cds, clone: NIASHv2069E09	trehalose-phosphate phosphatase	1101	1	10	0.114881	0.919445	3.00063	Up	0.0182906	0.0390376
AK361187	Hordeum vulgare subsp. vulgare mRNA for predicted protein, complete cds, clone: NIASHv1134K09	dnaj domain containing protein	501	2	20	0.504924	4.04115	3.00063	Up	0.000485994	0.00145332
AK353868	Hordeum vulgare subsp. vulgare mRNA for predicted protein, complete cds, clone: NIASHv1003F19	calmodulin binding protein	1284	1	10	0.0985074	0.788402	3.00063	Up	0.0182906	0.039049
MLOC_77579.1	Uncharacterized protein	retrotransposon line subclass	243	1	10	0.520508	4.16588	3.00063	Up	0.0182906	0.0390338
MLOC_48630.1	Uncharacterized protein (Fragment)	lysine-specific demethylase ref6-like	162	1	10	0.780762	6.24882	3.00063	Up	0.0182906	0.0390185
MLOC_11555.2	Uncharacterized protein	726249 os12g0120500	729	1	10	0.173503	1.38863	3.00063	Up	0.0182906	0.0390529
MLOC_4500.2	Uncharacterized protein	nbs-lrr disease resistance protein homologue	3303	5	50	0.191468	1.53241	3.00063	Up	1.42e-08	7.54e-08
MLOC_3686.1	Predicted protein (Uncharacterized protein)	cle family 402 protein	315	8	80	3.21228	25.7094	3.00063	Up	5.07e-13	3.79e-12
MLOC_67349.1	Uncharacterized protein	390632 at1g12480 t12c24_4	1737	1	10	0.0728172	0.582791	3.00063	Up	0.0182906	0.0390261
MLOC_54059.1	Uncharacterized protein	pentatricopeptide repeat-containing protein at4g13650-like	2775	2	20	0.0911593	0.729592	3.00063	Up	0.000485994	0.00145372
AK368040	Hordeum vulgare subsp. vulgare mRNA for predicted protein, complete cds, clone: NIASHv2066O24	protein	1032	1	10	0.122561	0.980919	3.00063	Up	0.0182906	0.0390147
MLOC_23419.1	Uncharacterized protein (Fragment)	vq motif family protein	363	1	10	0.348439	2.78873	3.00063	Up	0.0182906	0.0390452
MLOC_66803.2	Uncharacterized protein	2460331 zinc ring-type	894	1	10	0.14148	1.13234	3.00063	Up	0.0182906	0.03903
MLOC_56366.3	Uncharacterized protein	protein	1197	1	10	0.105667	0.845705	3.00063	Up	0.0182906	0.0390414
MLOC_52923.1	Predicted protein (Uncharacterized protein)	2244702 gir1	333	3	30	1.13949	9.1199	3.00063	Up	1.44e-05	5.43e-05
AK252060.1	-	852947 fusion protein of histone 2a and enhanced yellow fluorescence protein	561	71	708	16.0077	127.757	2.99656	Up	1.97e-104	9.54e-103
MLOC_50915.2	Uncharacterized protein	tpa: b3 dna binding domain family protein	1386	51	505	4.65415	36.8843	2.98641	Up	1.04e-74	3.61e-73
MLOC_10385.1	Uncharacterized protein	predicted protein	438	15	148	4.33163	34.2059	2.98126	Up	7.06e-23	8.6e-22
AK251792.1	-	histone -like isoform 1	408	185	1824	57.3516	452.561	2.98021	Up	7.59e-265	8.09e-263
AK359093	Hordeum vulgare subsp. vulgare mRNA for predicted protein, complete cds, clone: NIASHv1089E14	far-red impaired response	1350	11	108	1.03061	8.09847	2.97416	Up	5.2e-17	4.92e-16
AK360378	Hordeum vulgare subsp. vulgare mRNA for predicted protein, complete cds, clone: NIASHv1116O14	r2r3-myb protein	993	5	49	0.636875	4.99528	2.97148	Up	2.34e-08	1.21e-07
MLOC_62243.3	Uncharacterized protein	dna replication atp-dependent helicase dna2	3690	15	146	0.51416	4.00534	2.96163	Up	1.89e-22	2.26e-21
MLOC_4717.1	Uncharacterized protein	denticleless protein homolog a-like	660	3	29	0.574925	4.44802	2.95172	Up	2.37e-05	8.69e-05
MLOC_57391.1	Uncharacterized protein	class iii chitinase	897	14	135	1.9741	15.2354	2.94816	Up	9.02e-21	1e-19
AK248176.1	-	ribonucleotide reductase	2460	87	836	4.4732	34.402	2.94312	Up	7.43e-121	3.96e-119
MLOC_53422.1	Uncharacterized protein	2246677 nonspecific lipid-transfer protein precursor	300	1173	11174	494.55	3770.51	2.93057	Up	0	0
AK249961.1	-	hmg1 2-like	378	23	219	7.69608	58.6496	2.92993	Up	1.19e-32	1.96e-31
MLOC_76269.1	Predicted protein (Uncharacterized protein)	2258769 peptide-n4-asparagine amidase a	1632	69	657	5.34765	40.7529	2.92993	Up	6.44e-95	2.78e-93
MLOC_78617.2	Uncharacterized protein	2491180 os05g0320100	1182	26	247	2.78221	21.154	2.92663	Up	1.33e-36	2.42e-35
AK360656	Hordeum vulgare subsp. vulgare mRNA for predicted protein, complete cds, clone: NIASHv1122L11	transcription factor spatula-like	888	4	38	0.569745	4.33195	2.92663	Up	1.2e-06	5.2e-06
AK374994	Hordeum vulgare subsp. vulgare mRNA for predicted protein, complete cds, clone: NIASHv3082H04	60s ribosomal protein l28	444	2	19	0.569745	4.33195	2.92663	Up	0.000803154	0.0023149
AK377093	Hordeum vulgare subsp. vulgare mRNA for predicted protein, complete cds, clone: NIASHv3148C05	plasma membrane h+-atpase	2340	2	19	0.108106	0.82196	2.92663	Up	0.000803154	0.0023152
AK375125	Hordeum vulgare subsp. vulgare mRNA for predicted protein, complete cds, clone: NIASHv3085O23	protein	1533	2	19	0.165014	1.25466	2.92663	Up	0.000803154	0.00231459
MLOC_59358.4	-	sucrose synthase	2448	807	7544	41.6961	311.963	2.90339	Up	0	0
AK375892	Hordeum vulgare subsp. vulgare mRNA for predicted protein, complete cds, clone: NIASHv3108P13	probable metal-nicotianamine transporter ysl9-like	1440	3	28	0.263507	1.96838	2.90109	Up	3.89e-05	0.000138409
MLOC_69002.1	Predicted protein (Uncharacterized protein)	ethylene-responsive transcription factor rap2-11-like	903	6	56	0.840422	6.27788	2.90109	Up	3.34e-09	1.87e-08
AK376085	Hordeum vulgare subsp. vulgare mRNA for predicted protein, complete cds, clone: NIASHv3114F16	1-aminocyclopropane-1-carboxylate oxidase homolog 1-like	1008	21	195	2.63507	19.5834	2.89371	Up	6.95e-29	1.03e-27
AK252941.1	-	snf1-related protein kinase	1176	32	296	3.44173	25.4799	2.88815	Up	5.12e-43	1.09e-41
MLOC_9079.1	Uncharacterized protein (Fragment)	leaf rust resistance protein lr10	1047	4	37	0.483222	3.5774	2.88815	Up	1.97e-06	8.32e-06
MLOC_48344.2	Uncharacterized protein	2620544 protein	600	5	46	1.05403	7.76103	2.88033	Up	1.03e-07	4.99e-07
MLOC_14996.3	Uncharacterized protein	1634197 os04g0590366	747	28	257	4.74101	34.8278	2.87697	Up	2.11e-37	3.92e-36
AK355139	Hordeum vulgare subsp. vulgare mRNA for predicted protein, complete cds, clone: NIASHv1016I04	eukaryotic adp atp carrier	960	7	64	0.922275	6.74872	2.87135	Up	2.93e-10	1.79e-09
AK359393	Hordeum vulgare subsp. vulgare mRNA for predicted protein, complete cds, clone: NIASHv1095N16	fad-binding berberine family protein	1626	163	1483	12.6795	92.328	2.86428	Up	2.78e-207	2.43e-205
MLOC_32747.1	Uncharacterized protein	transposon mutator sub-class	2499	4	36	0.202455	1.45831	2.84863	Up	3.23e-06	1.33e-05
MLOC_34719.3	Uncharacterized protein	transducin wd40 domain-containing protein	609	1	9	0.20769	1.49602	2.84863	Up	0.0304442	0.061548
AK377074	Hordeum vulgare subsp. vulgare mRNA for predicted protein, partial cds, clone: NIASHv3147I21	cyclin d1	897	1	9	0.141007	1.01569	2.84863	Up	0.0304442	0.0615594
MLOC_31106.1	Uncharacterized protein	cyclin m	225	1	9	0.562149	4.04923	2.84863	Up	0.0304442	0.0615423
MLOC_24776.1	Uncharacterized protein	cytochrome c biogenesis partial	564	1	9	0.224261	1.61539	2.84863	Up	0.0304442	0.0615195
MLOC_3019.1	Uncharacterized protein	2829672 os02g0100600	624	2	18	0.405396	2.92012	2.84863	Up	0.00132224	0.00365984
MLOC_4545.1	Uncharacterized protein (Fragment)	ribonuclease h protein at1g65750-like	255	1	9	0.496014	3.57285	2.84863	Up	0.0304442	0.0615537
MLOC_37694.5	Uncharacterized protein (Fragment)	2433399 neurobeachin	2589	2	18	0.0977084	0.703807	2.84863	Up	0.00132224	0.0036603
MLOC_10012.1	Uncharacterized protein	sister chromatid cohesion 1 protein 2-like	1947	8	72	0.519706	3.74351	2.84863	Up	2.58e-11	1.72e-10
MLOC_74251.1	Uncharacterized protein	1249781 os04g0463200	1149	2	18	0.220163	1.58586	2.84863	Up	0.00132224	0.00366123
MLOC_74819.1	Predicted protein (Uncharacterized protein)	1667338 os03g0138600	2958	2	18	0.0855196	0.616009	2.84863	Up	0.00132224	0.00365938
AK368097	Hordeum vulgare subsp. vulgare mRNA for predicted protein, complete cds, clone: NIASHv2068B07	basic blue	255	2	18	0.992027	7.14571	2.84863	Up	0.00132224	0.0036617
AK371641	Hordeum vulgare subsp. vulgare mRNA for predicted protein, complete cds, clone: NIASHv2139B14	1005050 chemocyanin precursor	366	1	9	0.345583	2.48928	2.84863	Up	0.0304442	0.0615309
MLOC_43850.1	Uncharacterized protein (Fragment)	hypothetical protein	720	3	27	0.527014	3.79616	2.84863	Up	6.38e-05	0.000219291
AK361156	Hordeum vulgare subsp. vulgare mRNA for predicted protein, complete cds, clone: NIASHv1133N20	ribosome production factor 2 homolog	228	1	9	0.554752	3.99595	2.84863	Up	0.0304442	0.0615366
AK356167	Hordeum vulgare subsp. vulgare mRNA for predicted protein, complete cds, clone: NIASHv1030O14	reverse transcriptase	2184	1	9	0.0579137	0.41716	2.84863	Up	0.0304442	0.0615651
AK363650	Hordeum vulgare subsp. vulgare mRNA for predicted protein, complete cds, clone: NIASHv2017M03	peroxidase 72-like	1005	2	18	0.251708	1.81309	2.84863	Up	0.00132224	0.00366077
AK355314	Hordeum vulgare subsp. vulgare mRNA for predicted protein, complete cds, clone: NIASHv1018O16	cinnamyl alcohol dehydrogenase 7-like	1110	5	45	0.569745	4.10395	2.84863	Up	1.68e-07	7.96e-07
MLOC_21717.1	Uncharacterized protein	basic blue protein	399	4	36	1.268	9.13361	2.84863	Up	3.23e-06	1.33e-05
AK358994	Hordeum vulgare subsp. vulgare mRNA for predicted protein, complete cds, clone: NIASHv1087B17	847055 protein	996	1	9	0.126991	0.914737	2.84863	Up	0.0304442	0.0615252
MLOC_58115.2	Uncharacterized protein	ubiquitin carboxyl-terminal hydrolase 16-like	2835	55	494	2.45382	17.6395	2.84571	Up	1.01e-69	3.29e-68
MLOC_36410.1	Uncharacterized protein	hypothetical protein	2430	15	134	0.780762	5.58228	2.8379	Up	6.62e-20	7.12e-19
MLOC_55385.2	Uncharacterized protein	ring fyve phd zinc finger-containing protein	2364	13	116	0.695552	4.96733	2.83624	Up	2.13e-17	2.05e-16
MLOC_4129.1	Uncharacterized protein	b3 domain-containing protein os08g0325100-like	1581	9	80	0.72002	5.12237	2.8307	Up	2.29e-12	1.65e-11
AK360570	Hordeum vulgare subsp. vulgare mRNA for predicted protein, complete cds, clone: NIASHv1121A18	protein	1893	6	53	0.400898	2.83425	2.82166	Up	1.45e-08	7.66e-08
MLOC_59510.1	Uncharacterized protein	cell division control protein 45 homolog	1128	6	53	0.672784	4.75641	2.82166	Up	1.45e-08	7.66e-08
MLOC_476.1	Uncharacterized protein	1262823 nadh dehydrogenase subunit 2	282	4	35	1.79409	12.5641	2.80798	Up	5.26e-06	2.1e-05
MLOC_55525.1	Uncharacterized protein	sugar carrier protein c-like	1581	31	271	2.48007	17.352	2.80665	Up	2.07e-38	3.95e-37
AK374993	Hordeum vulgare subsp. vulgare mRNA for predicted protein, complete cds, clone: NIASHv3082H02	histone -like isoform 1	417	26	227	7.88626	55.1065	2.80481	Up	2.17e-32	3.56e-31
AK249748.1	-	acylamino-acid-releasing enzyme-like	2301	43	373	2.36366	16.4099	2.79547	Up	4.32e-52	1.08e-50
AK370749	Hordeum vulgare subsp. vulgare mRNA for predicted protein, complete cds, clone: NIASHv2116D20	protein kinase xa21	2811	6	52	0.269975	1.87264	2.79418	Up	2.35e-08	1.22e-07
AK375094	Hordeum vulgare subsp. vulgare mRNA for predicted protein, complete cds, clone: NIASHv3085E10	hydroxysteroid dehydrogenase-like protein 1-like	1017	3	26	0.373108	2.58801	2.79418	Up	0.000104193	0.000346716
MLOC_57259.1	Predicted protein (Uncharacterized protein)	pumilio homolog chloroplastic-like	1452	17	147	1.48087	10.2486	2.79091	Up	2.32e-21	2.65e-20
MLOC_24802.1	Maturase K	2716644 maturase	942	72	619	9.66753	66.5201	2.78257	Up	5.45e-85	2.15e-83
MLOC_36700.1	Uncharacterized protein	gibberellin induced protein	393	24	206	7.72418	53.0625	2.78024	Up	2.86e-29	4.27e-28
AK374103	Hordeum vulgare subsp. vulgare mRNA for predicted protein, complete cds, clone: NIASHv3054D08	receptor kinase 5	2523	10	85	0.501322	3.41047	2.76616	Up	8.67e-13	6.4e-12
AK372767	Hordeum vulgare subsp. vulgare mRNA for predicted protein, complete cds, clone: NIASHv3012A10	cytochrome p450 89a2-like	1548	2	17	0.163415	1.11171	2.76616	Up	0.00216778	0.0057502
MLOC_11952.1	Cytosine-specific methyltransferase (EC 2.1.1.37)	dna (cytosine-5)-methyltransferase 3-like	2199	67	567	3.85375	26.1018	2.75982	Up	2.48e-77	9.05e-76
MLOC_1587.2	Alpha-galactosidase (EC 3.2.1.22) (Melibiase)	799185 alpha-galactosidase expressed	1209	241	2018	25.213	168.969	2.74452	Up	3.45e-269	3.81e-267
AK374121	Hordeum vulgare subsp. vulgare mRNA for predicted protein, complete cds, clone: NIASHv3055A20	852947 fusion protein of histone 2a and enhanced yellow fluorescence protein	441	54	451	15.4878	103.526	2.7408	Up	2.11e-61	6.2e-60
MLOC_80962.2	Uncharacterized protein	ring-h2 finger protein atl11-like	765	12	100	1.98405	13.2328	2.73759	Up	1.11e-14	9.26e-14
AK375501	Hordeum vulgare subsp. vulgare mRNA for predicted protein, complete cds, clone: NIASHv3096C06	predicted protein	921	3	25	0.411998	2.74785	2.73759	Up	0.000169689	0.00054772
AK356366	Hordeum vulgare subsp. vulgare mRNA for predicted protein, partial cds, clone: NIASHv1033L17	cyclin-p3-1-like isoform 1	708	6	50	1.07189	7.14907	2.73759	Up	6.18e-08	3.06e-07
AK357081	Hordeum vulgare subsp. vulgare mRNA for predicted protein, complete cds, clone: NIASHv1045K11	735712 at5g63860 mgi19_6	1326	52	433	4.96014	33.0565	2.73648	Up	6.42e-59	1.81e-57
AK355109	Hordeum vulgare subsp. vulgare mRNA for predicted protein, complete cds, clone: NIASHv1015P22	1089292 chloroplast rna binding protein precursor	855	4	33	0.591735	3.90716	2.72309	Up	1.39e-05	5.26e-05
MLOC_70302.1	Uncharacterized protein	bzip dna-binding protein	504	23	189	5.77206	37.9616	2.71738	Up	2.3e-26	3.15e-25
MLOC_45211.1	Uncharacterized protein	zinc finger mym-type protein 1-like	285	5	41	2.21901	14.563	2.71432	Up	1.17e-06	5.04e-06
MLOC_12995.1	Uncharacterized protein	2610323 protein	1116	50	407	5.66682	36.9184	2.70373	Up	8.66e-55	2.28e-53
MLOC_9778.1	Uncharacterized protein	uncharacterized mfs-type transporter c19orf28-like	1383	11	89	1.00601	6.51449	2.695	Up	5.21e-13	3.9e-12
AK359280	Hordeum vulgare subsp. vulgare mRNA for predicted protein, complete cds, clone: NIASHv1093C19	peroxidase 3-like	993	11	89	1.40113	9.07306	2.695	Up	5.21e-13	3.9e-12
AK362764	Hordeum vulgare subsp. vulgare mRNA for predicted protein, complete cds, clone: NIASHv2009P06	protease inhibitor seed storage lipid transfer protein family protein	342	3	24	1.1095	7.10392	2.6787	Up	0.000275408	0.000855936
MLOC_14431.1	Kinesin-like protein	kinesin-like protein kif22-like	1458	2	16	0.173503	1.1109	2.6787	Up	0.00353782	0.00895051
MLOC_65443.1	Uncharacterized protein	low quality protein: fbd-associated f-box protein at3g50710-like	1596	3	24	0.237751	1.52227	2.6787	Up	0.000275408	0.000855815
MLOC_46662.2	Uncharacterized protein	2582873 -benzoquinone reductase-like protein	612	1	8	0.206672	1.32328	2.6787	Up	0.0503356	0.0946219
AK248308.1	-	ternary complex factor mip1	1923	4	32	0.263096	1.68455	2.6787	Up	2.25e-05	8.27e-05
MLOC_36571.1	Uncharacterized protein	916989 os04g0645200	270	4	32	1.87383	11.9977	2.6787	Up	2.25e-05	8.28e-05
MLOC_18750.1	Uncharacterized protein	glucan endo- -beta-glucosidase 8-like	1458	1	8	0.0867513	0.555451	2.6787	Up	0.0503356	0.0946382
MLOC_63408.1	Cytosolic Fe-S cluster assembly factor NBP35	cytosolic fe-s cluster assembly factor nubp1-like	1044	6	48	0.726916	4.65429	2.6787	Up	1.61e-07	7.64e-07
MLOC_14316.1	Uncharacterized protein	neutral alkaline invertase	1278	2	16	0.19794	1.26737	2.6787	Up	0.00353782	0.00895258
AK364222	Hordeum vulgare subsp. vulgare mRNA for predicted protein, partial cds, clone: NIASHv2022M19	26307 os06g0645600	1608	1	8	0.0786589	0.503636	2.6787	Up	0.0503356	0.0945975
MLOC_68363.1	Uncharacterized protein	universal stress protein family protein	552	1	8	0.229137	1.46711	2.6787	Up	0.0503356	0.0945812
MLOC_6647.2	Uncharacterized protein	726794 g1-like7 protein	636	3	24	0.59662	3.82003	2.6787	Up	0.000275408	0.000856058
MLOC_55667.12	Uncharacterized protein	pentatricopeptide repeat-containing protein at2g35130-like	1935	2	16	0.130732	0.837051	2.6787	Up	0.00353782	0.0089474
AK359477	Hordeum vulgare subsp. vulgare mRNA for predicted protein, complete cds, clone: NIASHv1097M03	929642 at2g30700	648	3	24	0.585572	3.74929	2.6787	Up	0.000275408	0.000855693
MLOC_75895.1	Uncharacterized protein	1906924 receptor protein kinase-like protein	801	4	32	0.631628	4.04418	2.6787	Up	2.25e-05	8.27e-05
AK376525	Hordeum vulgare subsp. vulgare mRNA for predicted protein, complete cds, clone: NIASHv3126L22	two-component response regulator arr2-like	1437	4	32	0.352076	2.25427	2.6787	Up	2.25e-05	8.27e-05
MLOC_64532.1	Uncharacterized protein	retrotransposon ty1-copia subclass	915	2	16	0.276467	1.77016	2.6787	Up	0.00353782	0.00894636
MLOC_32835.1	Uncharacterized protein	cell number regulator 11-like	273	2	16	0.926619	5.93294	2.6787	Up	0.00353782	0.00895154
AK373335	Hordeum vulgare subsp. vulgare mRNA for predicted protein, complete cds, clone: NIASHv3027E11	tpa: cyclin superfamily	1380	1	8	0.0916547	0.586846	2.6787	Up	0.0503356	0.0945649
MLOC_18726.1	Uncharacterized protein	ring finger	531	1	8	0.238199	1.52514	2.6787	Up	0.0503356	0.0946301
MLOC_74327.1	Uncharacterized protein (Fragment)	ribonuclease h protein at1g65750-like	243	1	8	0.520508	3.3327	2.6787	Up	0.0503356	0.0946138
MLOC_11531.1	Uncharacterized protein	serine carboxypeptidase-like 33-like	1458	6	48	0.520508	3.3327	2.6787	Up	1.61e-07	7.64e-07
MLOC_59746.4	Uncharacterized protein	alcohol dehydrogenase-like 7-like	930	1	8	0.136004	0.870803	2.6787	Up	0.0503356	0.0946056
MLOC_47931.3	Uncharacterized protein	probable atp-dependent dna helicase hfm1-like	336	1	8	0.376439	2.41026	2.6787	Up	0.0503356	0.0945893
MLOC_59310.1	Uncharacterized protein	retrotransposon unclassified	672	1	8	0.188219	1.20513	2.6787	Up	0.0503356	0.0945731
MLOC_55646.1	Uncharacterized protein	methylsterol monooxygenase ddb_g0269788-like	1131	2	16	0.223667	1.43209	2.6787	Up	0.00353782	0.00894947
AK366043	Hordeum vulgare subsp. vulgare mRNA for predicted protein, complete cds, clone: NIASHv2040A06	2609248 protein	1107	2	16	0.228516	1.46314	2.6787	Up	0.00353782	0.00894843
AK363636	Hordeum vulgare subsp. vulgare mRNA for predicted protein, complete cds, clone: NIASHv2017I24	histone -like isoform 1	411	71	567	21.8499	139.654	2.67616	Up	6.93e-75	2.42e-73
AK375311	Hordeum vulgare subsp. vulgare mRNA for predicted protein, complete cds, clone: NIASHv3090L01	burp domain-containing protein 3-like	1608	280	2223	22.0245	139.948	2.66771	Up	1.71e-287	2.03e-285
AK354984	Hordeum vulgare subsp. vulgare mRNA for predicted protein, complete cds, clone: NIASHv1014F05	nad-dependent epimerase dehydratase family protein	1470	16	127	1.37669	8.7458	2.66739	Up	7.8e-18	7.71e-17
MLOC_65864.1	Predicted protein (Uncharacterized protein)	uncharacterized oxidoreductase -like	870	11	87	1.59922	10.1231	2.66221	Up	1.35e-12	9.81e-12
MLOC_73536.2	Uncharacterized protein	1000299 ribosomal rna apurinic site specific lyase	1314	17	134	1.63639	10.3234	2.65733	Up	1.13e-18	1.15e-17
MLOC_74118.1	Uncharacterized protein	deoxyuridine 5 -triphosphate nucleotidohydrolase-like	489	8	63	2.06926	13.042	2.65598	Up	1.95e-09	1.12e-08
AK248730.1	-	2597604 histone h4	309	16	126	6.54931	41.2786	2.65598	Up	1.25e-17	1.22e-16
MLOC_67381.1	Uncharacterized protein	phosphoenolpyruvate carboxylase	2733	148	1165	6.84945	43.1518	2.65536	Up	8.49e-151	5.62e-149
MLOC_75643.1	Uncharacterized protein	leucine-rich repeat receptor protein kinase exs-like	3930	20	157	0.643682	4.04408	2.65139	Up	1.34e-21	1.55e-20
MLOC_52543.1	Uncharacterized protein	1302719 os05g0551500	231	10	78	5.47547	34.1818	2.64217	Up	2.43e-11	1.62e-10
MLOC_25077.2	Uncharacterized protein (Fragment)	transposon en spm sub- expressed	708	5	39	0.893245	5.57628	2.64217	Up	3.04e-06	1.25e-05
AK364194	Hordeum vulgare subsp. vulgare mRNA for predicted protein, complete cds, clone: NIASHv2022J06	cytochrome p450 superfamily protein	1659	40	312	3.04963	19.038	2.64217	Up	2.33e-41	4.77e-40
MLOC_18047.2	Uncharacterized protein	rna-binding ras-gap sh3 binding protein	759	19	148	3.16625	19.7394	2.64023	Up	2.37e-20	2.59e-19
MLOC_57909.2	Uncharacterized protein	protein kinase	2334	38	296	2.05929	12.8382	2.64023	Up	2.77e-39	5.4e-38
AK253094.1	-	2260 adp-glucose pyrophosphorylase small subunit	1542	2869	22219	235.331	1458.66	2.63187	Up	0	0
AK248244.1	-	1712400 qltg3-1	438	23	178	6.64183	41.1395	2.63087	Up	4.12e-24	5.28e-23
AK375922	Hordeum vulgare subsp. vulgare mRNA for predicted protein, partial cds, clone: NIASHv3109O13	cysteine-rich peptide	333	7	54	2.65881	16.4158	2.62623	Up	3.59e-08	1.83e-07
MLOC_7435.1	Uncharacterized protein	c2 domain-containing protein	2214	14	108	0.799805	4.93809	2.62623	Up	3.95e-15	3.36e-14
MLOC_22265.1	Uncharacterized protein	59283 transcription factor x1	1077	6	46	0.704643	4.32369	2.6173	Up	4.16e-07	1.89e-06
MLOC_60115.1	Predicted protein (Uncharacterized protein)	protein	1032	9	69	1.10305	6.76834	2.6173	Up	4.4e-10	2.65e-09
MLOC_46237.2	Uncharacterized protein	transposon mutator sub-class	729	3	23	0.520508	3.19384	2.6173	Up	0.000445344	0.00134113
AK359991	Hordeum vulgare subsp. vulgare mRNA for predicted protein, complete cds, clone: NIASHv1108A05	2597604 histone h4	309	42	322	17.1919	105.49	2.6173	Up	3.26e-42	6.79e-41
AK366006	Hordeum vulgare subsp. vulgare mRNA for predicted protein, partial cds, clone: NIASHv2039L12	chaperone protein chloroplastic-like	2910	38	289	1.65167	10.0535	2.6057	Up	7.27e-38	1.37e-36
MLOC_75032.1	Uncharacterized protein	leucoanthocyanidin dioxygenase	1065	12	91	1.42517	8.64977	2.60153	Up	7.87e-13	5.83e-12
AK356027	Hordeum vulgare subsp. vulgare mRNA for predicted protein, complete cds, clone: NIASHv1028P22	nodulin-26 like intrinsic protein	834	7	53	1.06161	6.43314	2.59927	Up	5.75e-08	2.86e-07
MLOC_62512.1	Peroxidase (EC 1.11.1.7)	peroxidase	990	100	756	12.7761	77.3036	2.59709	Up	3.83e-96	1.69e-94
AK374727	Hordeum vulgare subsp. vulgare mRNA for predicted protein, complete cds, clone: NIASHv3074N01	2693640 cytoplasmic protein of eukaryotic origin ( kd)-like	918	9	68	1.24003	7.49858	2.59624	Up	7.04e-10	4.17e-09
AK371644	Hordeum vulgare subsp. vulgare mRNA for predicted protein, complete cds, clone: NIASHv2139C06	2612187 protein	1419	9	68	0.802221	4.85109	2.59624	Up	7.04e-10	4.17e-09
MLOC_10982.1	Uncharacterized protein	f-box lrr-repeat protein at5g02700-like	1602	31	234	2.44756	14.7865	2.59487	Up	8.34e-31	1.31e-29
AK362441	Hordeum vulgare subsp. vulgare mRNA for predicted protein, complete cds, clone: NIASHv2005F09	2597604 histone h4	309	64	482	26.1972	157.907	2.59159	Up	9.34e-62	2.76e-60
MLOC_51163.2	Uncharacterized protein	pentatricopeptide repeat-containing protein at4g21300-like	2307	2	15	0.109652	0.658198	2.58559	Up	0.00574472	0.0139117
AK363613	-	isoleucyl-trna cytoplasmic-like	2136	4	30	0.23686	1.42178	2.58559	Up	5.83e-05	0.000202133
MLOC_11278.1	Predicted protein (Uncharacterized protein)	1909219 duf231 domain containing family protein	1134	2	15	0.223075	1.33903	2.58559	Up	0.00574472	0.0139086
MLOC_18410.1	Uncharacterized protein	long cell-linked locus protein	537	4	30	0.942149	5.65536	2.58559	Up	5.83e-05	0.000202101
MLOC_32501.1	Uncharacterized protein	retrotransposon unclassified	363	2	15	0.696879	4.18309	2.58559	Up	0.00574472	0.0139101
MLOC_37807.2	Uncharacterized protein	2675341 subtilisin-like serine protease	2289	2	15	0.110514	0.663374	2.58559	Up	0.00574472	0.013904
AK355437	Hordeum vulgare subsp. vulgare mRNA for predicted protein, complete cds, clone: NIASHv1020K20	udp-glycosyltransferase 91c1-like	1449	2	15	0.17458	1.04794	2.58559	Up	0.00574472	0.0139055
AK251134.1	-	362724 mannitol expressed	1533	2	15	0.165014	0.990517	2.58559	Up	0.00574472	0.0139071
MLOC_10855.1	Predicted protein (Uncharacterized protein)	856820 aquaporin	870	581	4303	84.4677	500.685	2.56743	Up	0	0
MLOC_10314.1	Uncharacterized protein	dna replication licensing factor mcm5-a-like	1515	54	399	4.50832	26.6608	2.56406	Up	8.27e-51	2.02e-49
MLOC_37653.2	Uncharacterized protein	udp-glycosyltransferase 74f1-like	1104	16	118	1.83309	10.82	2.56134	Up	5.26e-16	4.72e-15
MLOC_7404.2	Uncharacterized protein	probable serine threonine-protein kinase at1g01540-like	1554	20	146	1.62784	9.51075	2.5466	Up	2.26e-19	2.38e-18
MLOC_12203.1	Uncharacterized protein	2771790 os07g0499900	1464	30	219	2.59187	15.1431	2.5466	Up	2.33e-28	3.42e-27
MLOC_80595.2	Uncharacterized protein	1903088 nucleic acid binding protein	957	22	160	2.90767	16.9247	2.5412	Up	4.73e-21	5.34e-20
AK359748	Hordeum vulgare subsp. vulgare mRNA for predicted protein, complete cds, clone: NIASHv1102E23	752225 isp4-like protein	2247	4	29	0.22516	1.3065	2.53668	Up	9.35e-05	0.000313502
MLOC_68183.1	Uncharacterized protein	auxin-induced protein 5ng4-like	1143	28	203	3.09846	17.9789	2.53668	Up	2.77e-26	3.8e-25
MLOC_71597.1	Predicted protein (Uncharacterized protein)	2621335 protein	1590	311	2252	24.7398	143.379	2.53492	Up	2.5e-275	2.84e-273
MLOC_15376.1	Uncharacterized protein	1010104 aspartic proteinase nepenthesin ii	1305	15	108	1.45383	8.37773	2.5267	Up	1.47e-14	1.22e-13
MLOC_21715.1	Uncharacterized protein	14646 transposon ping pong snoopy sub-class	600	5	36	1.05403	6.07385	2.5267	Up	1.25e-05	4.76e-05
MLOC_7482.1	Predicted protein (Uncharacterized protein)	probable peptide nitrate transporter at5g62680-like	1809	117	841	8.18052	47.062	2.5243	Up	1.77e-103	8.43e-102
MLOC_81678.2	Pectinesterase (EC 3.1.1.11)	probable pectinesterase 15-like	1224	6	43	0.620017	3.55631	2.52	Up	1.7e-06	7.2e-06
AK373951	Hordeum vulgare subsp. vulgare mRNA for predicted protein, complete cds, clone: NIASHv3048P20	1851719 os11g0458100	1758	44	314	3.16568	18.0811	2.51389	Up	1.82e-39	3.58e-38
AK251633.1	-	852947 fusion protein of histone 2a and enhanced yellow fluorescence protein	441	175	1248	50.1918	286.476	2.51289	Up	6.28e-152	4.18e-150
MLOC_68174.2	Uncharacterized protein	f-box protein at4g35930-like	882	9	64	1.29065	7.34555	2.50878	Up	4.54e-09	2.51e-08
AK358656	Hordeum vulgare subsp. vulgare mRNA for predicted protein, complete cds, clone: NIASHv1081C04	f-box kelch-repeat protein skip25-like	1239	21	149	2.14379	12.1738	2.50555	Up	2.06e-19	2.17e-18
MLOC_72641.1	Uncharacterized protein	histone-like transcription factor and archaeal histone family protein	1113	14	99	1.59099	9.00436	2.5007	Up	2.58e-13	1.97e-12
AK357487	Hordeum vulgare subsp. vulgare mRNA for predicted protein, complete cds, clone: NIASHv1054I15	1389886 ettin protein	2091	31	219	1.87517	10.6024	2.49929	Up	8.45e-28	1.21e-26
AK355159	Hordeum vulgare subsp. vulgare mRNA for predicted protein, complete cds, clone: NIASHv1016M04	peroxidase 21	1011	16	113	2.00172	11.3146	2.49888	Up	5.29e-15	4.47e-14
MLOC_53948.1	Predicted protein (Uncharacterized protein)	rare lipoprotein a like double-psi beta-barrel containing expressed	1245	25	176	2.53983	14.3105	2.49428	Up	1.43e-22	1.72e-21
AK364135	Hordeum vulgare subsp. vulgare mRNA for predicted protein, partial cds, clone: NIASHv2022A18	2844541 tcp-domain protein	1206	2	14	0.209757	1.17515	2.48606	Up	0.00927646	0.0213943
AK371900	Hordeum vulgare subsp. vulgare mRNA for predicted protein, complete cds, clone: NIASHv2143A11	pentatricopeptide repeat-containing protein at3g25970-like	2094	2	14	0.120806	0.676806	2.48606	Up	0.00927646	0.0213784
MLOC_59004.2	Uncharacterized protein	ap2 erebp-like protein	1107	1	7	0.114258	0.640123	2.48606	Up	0.0825658	0.144452
MLOC_26193.1	Uncharacterized protein	protein far1-related sequence 5-like	423	1	7	0.299015	1.67522	2.48606	Up	0.0825658	0.144498
MLOC_7175.1	Uncharacterized protein	ring-h2 finger protein atl8-like	609	2	14	0.415381	2.32715	2.48606	Up	0.00927646	0.0213897
MLOC_65217.1	Uncharacterized protein	gpi-anchored protein	582	3	21	0.651977	3.65266	2.48606	Up	0.00115041	0.00321808
AK354043	Hordeum vulgare subsp. vulgare mRNA for predicted protein, partial cds, clone: NIASHv1004K05	retrotransposon unclassified	2604	1	7	0.0485728	0.272126	2.48606	Up	0.0825658	0.144464
MLOC_69669.1	Predicted protein (Uncharacterized protein)	1632073 os02g0595300	639	2	14	0.395879	2.21789	2.48606	Up	0.00927646	0.0213988
MLOC_10496.1	Uncharacterized protein	predicted protein	153	1	7	0.826689	4.63148	2.48606	Up	0.0825658	0.144487
AK377075	Hordeum vulgare subsp. vulgare mRNA for predicted protein, partial cds, clone: NIASHv3147J21	1245264 os04g0117200	753	2	14	0.335945	1.88211	2.48606	Up	0.00927646	0.0213875
MLOC_65676.1	Uncharacterized protein	subtilisin-like protease	1950	5	35	0.324317	1.81696	2.48606	Up	1.99e-05	7.38e-05
MLOC_2183.2	Uncharacterized protein	hypothetical protein OsJ_19744	384	2	14	0.658768	3.69071	2.48606	Up	0.00927646	0.0213807
MLOC_52822.2	Uncharacterized protein	pentatricopeptide repeat-containing protein at4g13650-like	2457	1	7	0.0514788	0.288407	2.48606	Up	0.0825658	0.144417
MLOC_59227.1	Uncharacterized protein	blue copper	528	1	7	0.239552	1.34208	2.48606	Up	0.0825658	0.14451
MLOC_31327.1	Uncharacterized protein	scarecrow-like protein 28-like	954	2	14	0.265164	1.48557	2.48606	Up	0.00927646	0.0213852
AK357630	Hordeum vulgare subsp. vulgare mRNA for predicted protein, complete cds, clone: NIASHv1058C16	2252383 3-oxoacyl-synthase i	1386	2	14	0.182516	1.02253	2.48606	Up	0.00927646	0.0213965
AK360828	Hordeum vulgare subsp. vulgare mRNA for predicted protein, complete cds, clone: NIASHv1126B11	purple acid phosphatase 22-like	1596	8	56	0.634002	3.55196	2.48606	Up	5.15e-08	2.58e-07
MLOC_62653.1	Uncharacterized protein	protein far1-related sequence 5-like	414	2	14	0.611031	3.42327	2.48606	Up	0.00927646	0.0213717
MLOC_48372.1	Uncharacterized protein	b3 domain-containing protein os06g0112300-like	603	2	14	0.419514	2.3503	2.48606	Up	0.00927646	0.021392
AK371349	Hordeum vulgare subsp. vulgare mRNA for predicted protein, complete cds, clone: NIASHv2131L04	amino acid permease	1566	2	14	0.161537	0.905001	2.48606	Up	0.00927646	0.021383
MLOC_77488.1	Homeodomain leucine zipper protein class 1 (Predicted protein) (Uncharacterized protein)	2312016 homeodomain leucine zipper protein	708	9	63	1.60784	9.00783	2.48606	Up	7.19e-09	3.92e-08
MLOC_60569.1	Uncharacterized protein	tlph_orysj ame: full=thaumatin-like protein flags: precursor	765	1	7	0.165338	0.926295	2.48606	Up	0.0825658	0.144394
MLOC_81973.1	Uncharacterized protein (Fragment)		285	1	7	0.443802	2.48637	2.48606	Up	0.0825658	0.144429
AK354670	Hordeum vulgare subsp. vulgare mRNA for predicted protein, complete cds, clone: NIASHv1009M20	probable xyloglucan endotransglucosylase hydrolase protein 30-like	1077	1	7	0.117441	0.657954	2.48606	Up	0.0825658	0.144441
AK366255	Hordeum vulgare subsp. vulgare mRNA for predicted protein, complete cds, clone: NIASHv2041H24	outer envelope protein of 80 chloroplastic-like	1086	1	7	0.116467	0.652501	2.48606	Up	0.0825658	0.144406
MLOC_43984.1	Uncharacterized protein	1286556 os05g0365200	1632	2	14	0.155004	0.868402	2.48606	Up	0.00927646	0.0213739
AK370596	Hordeum vulgare subsp. vulgare mRNA for predicted protein, complete cds, clone: NIASHv2112P11	zinc finger protein constans-like 15-like	1185	2	14	0.213474	1.19598	2.48606	Up	0.00927646	0.0213762
MLOC_30969.1	Uncharacterized protein	transposon en spm sub-class	456	1	7	0.277376	1.55398	2.48606	Up	0.0825658	0.144475
MLOC_31360.1	Uncharacterized protein	o-methyltransferase zrp4	1083	56	390	6.54023	36.4543	2.47868	Up	6.73e-48	1.57e-46
MLOC_79196.1	Uncharacterized protein	2246677 nonspecific lipid-transfer protein precursor	285	63	438	27.9595	155.576	2.47621	Up	1.54e-53	3.94e-52
AK375075	Hordeum vulgare subsp. vulgare mRNA for predicted protein, complete cds, clone: NIASHv3084O17	protein breast cancer susceptibility 1 homolog	2955	29	201	1.24129	6.88575	2.47177	Up	2.48e-25	3.3e-24
MLOC_5431.2	Carboxypeptidase (EC 3.4.16.-)	serine carboxypeptidase 24-like	1557	30	207	2.43706	13.4584	2.4653	Up	5.68e-26	7.69e-25
MLOC_46970.2	Uncharacterized protein	predicted protein	2163	29	200	1.6958	9.36023	2.46458	Up	3.91e-25	5.18e-24
MLOC_73036.2	Uncharacterized protein	1631656 os12g0601000	1434	25	172	2.20508	12.1421	2.46111	Up	8.84e-22	1.03e-20
AK361678	Hordeum vulgare subsp. vulgare mRNA for predicted protein, complete cds, clone: NIASHv1146F17	2618690 protein	2382	8	55	0.424798	2.3374	2.46006	Up	8.16e-08	4e-07
AK367336	Hordeum vulgare subsp. vulgare mRNA for predicted protein, complete cds, clone: NIASHv2055E12	yggt family protein	693	7	48	1.27761	7.01166	2.45631	Up	5.89e-07	2.63e-06
AK373457	Hordeum vulgare subsp. vulgare mRNA for predicted protein, partial cds, clone: NIASHv3031G17	protein ein4-like	2193	13	89	0.749788	4.10832	2.45399	Up	7.16e-12	4.97e-11
MLOC_45783.1	Predicted protein (Uncharacterized protein)	2253809 pollen-specific protein like	321	25	171	9.85074	53.9267	2.4527	Up	1.39e-21	1.6e-20
MLOC_15452.1	Uncharacterized protein	rhamnogalacturonate lyase-like	1995	62	422	3.93081	21.4132	2.4456	Up	6.19e-51	1.51e-49
AK359064	Hordeum vulgare subsp. vulgare mRNA for predicted protein, complete cds, clone: NIASHv1088J16	2607414 protein	1248	36	244	3.64856	19.7919	2.43951	Up	5.2e-30	8.03e-29
AK365180	Hordeum vulgare subsp. vulgare mRNA for predicted protein, partial cds, clone: NIASHv2031L10	2881413 transducin-like	1947	8	54	0.519706	2.80764	2.43359	Up	1.29e-07	6.19e-07
MLOC_9291.1	Uncharacterized protein	serine threonine protein kinase atm	1824	4	27	0.277376	1.49848	2.43359	Up	0.000237776	0.000749758
MLOC_69091.1	Uncharacterized protein	763751 shock protein src2	1221	4	27	0.41436	2.23852	2.43359	Up	0.000237776	0.00074965
AK373742	Hordeum vulgare subsp. vulgare mRNA for predicted protein, complete cds, clone: NIASHv3042J14	852947 fusion protein of histone 2a and enhanced yellow fluorescence protein	441	139	937	39.8667	215.087	2.43166	Up	2.38e-110	1.2e-108
AK251773.1	-	probable leucine-rich repeat receptor-like serine threonine-protein kinase at3g14840-like	3045	19	128	0.789224	4.25535	2.43077	Up	2.41e-16	2.21e-15
AK248367.1	-	histone h2a	498	342	2301	86.8621	467.735	2.42889	Up	5.87e-268	6.37e-266
MLOC_66827.1	Uncharacterized protein	long chain acyl- synthetase 2-like	1986	51	341	3.24806	17.3815	2.4199	Up	5.65e-41	1.15e-39
MLOC_53923.1	Uncharacterized protein	cytokinin oxidase dehydrogenase	1776	30	200	2.13654	11.3999	2.41567	Up	1.35e-24	1.76e-23
MLOC_81533.3	Uncharacterized protein	probable lrr receptor-like serine threonine-protein kinase at1g74360-like	2265	3	20	0.167528	0.893871	2.41567	Up	0.0018366	0.00493344
AK376765	Hordeum vulgare subsp. vulgare mRNA for predicted protein, complete cds, clone: NIASHv3135C08	probable wrky transcription factor 2-like	2208	3	20	0.171853	0.916946	2.41567	Up	0.0018366	0.00493405
MLOC_10177.1	Uncharacterized protein	fimbriata-like protein	888	13	86	1.85167	9.80389	2.40453	Up	2.8e-11	1.85e-10
MLOC_10003.2	Uncharacterized protein	1029275 lag1 and cln8 lipid-sensing domain containing protein	789	5	33	0.801543	4.23399	2.40117	Up	5.01e-05	0.000175757
MLOC_68151.2	Uncharacterized protein	b3 domain-containing protein os03g0619600-like	1806	5	33	0.350176	1.84973	2.40117	Up	5.01e-05	0.000175786
MLOC_8015.1	Uncharacterized protein	422975 os10g0446100	834	13	85	1.97156	10.3173	2.38765	Up	4.39e-11	2.86e-10
AK370836	Hordeum vulgare subsp. vulgare mRNA for predicted protein, complete cds, clone: NIASHv2117P18	50s ribosomal protein l9	591	74	482	15.8372	82.5605	2.38214	Up	2.95e-56	8.01e-55
AK362746	Hordeum vulgare subsp. vulgare mRNA for predicted protein, partial cds, clone: NIASHv2009N08	leucyl-trna cytoplasmic-like	3114	8	52	0.324941	1.69043	2.37914	Up	3.2e-07	1.47e-06
MLOC_57382.1	Uncharacterized protein	cytochrome c oxidase copper chaperone-like	231	2	13	1.09509	5.69697	2.37914	Up	0.0148868	0.0326799
AK372981	Hordeum vulgare subsp. vulgare mRNA for predicted protein, partial cds, clone: NIASHv3017I07	ubiquitin carboxyl-terminal hydrolase isozyme l5-like	912	2	13	0.277376	1.44298	2.37914	Up	0.0148868	0.0326931
MLOC_54234.1	Uncharacterized protein	disease resistance rpp13-like protein 3-like	3435	6	39	0.220932	1.14935	2.37914	Up	1.07e-05	4.11e-05
MLOC_5845.2	Uncharacterized protein	pentatricopeptide repeat-containing protein mitochondrial-like	2496	2	13	0.101349	0.527244	2.37914	Up	0.0148868	0.0326964
MLOC_38601.1	Uncharacterized protein	auxin-induced protein 5ng4-like	816	4	26	0.620017	3.22549	2.37914	Up	0.000377042	0.00114795
MLOC_39826.1	Uncharacterized protein	1631615 os12g0561500	492	2	13	0.51416	2.6748	2.37914	Up	0.0148868	0.0326865
MLOC_25006.1	NADH-ubiquinone oxidoreductase chain 3 (EC 1.6.5.3)	nadh dehydrogenase subunit 3	282	2	13	0.897046	4.66667	2.37914	Up	0.0148868	0.0326832
MLOC_63859.2	Uncharacterized protein	1665047 os03g0281300	1404	2	13	0.180176	0.937323	2.37914	Up	0.0148868	0.0326766
MLOC_61088.1	Uncharacterized protein	1848358 partial	786	2	13	0.321841	1.6743	2.37914	Up	0.0148868	0.0326997
MLOC_11331.2	Uncharacterized protein	gem-like protein 4-like	687	2	13	0.36822	1.91558	2.37914	Up	0.0148868	0.0326898
MLOC_40499.1	Uncharacterized protein	cell division protein aaa atpase family	1770	216	1403	15.4353	80.2412	2.37811	Up	3.61e-160	2.55e-158
MLOC_53554.2	Uncharacterized protein	1390847 os01g0753800	636	19	123	3.77859	19.5777	2.37329	Up	2.29e-15	1.98e-14
MLOC_51583.2	3-ketoacyl-CoA synthase (EC 2.3.1.-)	3-ketoacyl- synthase 6-like	1503	47	301	3.95524	20.2731	2.35773	Up	2.63e-35	4.61e-34
MLOC_32822.1	Uncharacterized protein	avenin-like a precursor	378	138	881	46.1765	235.938	2.35317	Up	5.15e-100	2.37e-98
MLOC_62746.1	Uncharacterized protein	lichenase-2 precursor	1191	318	2029	33.7714	172.458	2.35237	Up	7.12e-228	6.73e-226
AK358760	Hordeum vulgare subsp. vulgare mRNA for predicted protein, complete cds, clone: NIASHv1082K22	2890420 cyclin-like	645	11	70	2.15708	10.9863	2.34855	Up	3.42e-09	1.91e-08
MLOC_713.1	Uncharacterized protein	transposon mutator sub-class	465	3	19	0.816022	4.13631	2.34167	Up	0.00291756	0.00756985
AK250623.1	-	defensin precursor	180	9	57	6.32417	32.0564	2.34167	Up	1.1e-07	5.32e-07
AK375707	Hordeum vulgare subsp. vulgare mRNA for predicted protein, complete cds, clone: NIASHv3101N21	gdsl esterase lipase at1g28600-like	1182	197	1238	21.0806	106.027	2.33044	Up	3.05e-138	1.87e-136
MLOC_57678.1	Uncharacterized protein	alpha-l-fucosidase 2 precursor	1134	194	1214	21.6383	108.372	2.32434	Up	3.52e-135	2.1e-133
MLOC_40299.2	Uncharacterized protein	wall-associated receptor kinase 5-like	1689	4	25	0.299546	1.49838	2.32256	Up	0.000595416	0.00175388
MLOC_6058.2	Uncharacterized protein	dna replication complex gins protein psf1-like	918	9	56	1.24003	6.1753	2.31613	Up	1.72e-07	8.15e-07
MLOC_55354.1	Predicted protein (Uncharacterized protein)	1666109 os03g0253600	984	5	31	0.642701	3.18918	2.31097	Up	0.000124478	0.000408554
MLOC_35010.1	Uncharacterized protein	receptor-like protein kinase feronia-like	1503	22	136	1.85139	9.15994	2.30673	Up	2.43e-16	2.22e-15
MLOC_9538.1	DNA-directed RNA polymerase (EC 2.7.7.6)	rna polymerase beta subunit	258	6	37	2.94148	14.5176	2.30319	Up	2.64e-05	9.65e-05
[truncated: 19,838 more rows]

## Sheet: Table S2
Table S2. List of DEGs(FDR ≤ 0.001 AND |log2Ratio| ≥ 1) between Morex-VS-Dulihuang.
geneID	annotation in NCBI	annotation in IPK	geneLength	Morex-Expression	Dulihuang-Expression	Morex-RPKM	Dulihuang-RPKM	log2 Ratio(Dulihuang/Morex)	Up-Down-Regulation(Dulihuang/Morex)	P-value	FDR
AK354890	Hordeum vulgare subsp. vulgare mRNA for predicted protein, complete cds, clone: NIASHv1012P07	defensin precursor	252	0	707	0.001	284.009	18.1156	Up	3.23e-181	2.52e-179
MLOC_71920.1	Pectinesterase (EC 3.1.1.11)	880713 pectinesterase	1683	0	1961	0.001	117.952	16.8478	Up	0	0
AK360528	Hordeum vulgare subsp. vulgare mRNA for predicted protein, complete cds, clone: NIASHv1119O03	2613517 protein	729	0	769	0.001	106.785	16.7044	Up	4.75e-197	4.03e-195
AK251040.1	-	adp-ribosylation factor	543	0	551	0.001	102.722	16.6484	Up	2.21e-141	1.38e-139
MLOC_21916.1	Uncharacterized protein	hypothetical protein ZEAMMB73_263650	297	0	291	0.001	99.1858	16.5978	Up	5.46e-75	1.92e-73
MLOC_20004.1	Uncharacterized protein	PREDICTED: uncharacterized protein LOC100824735	249	0	226	0.001	91.8802	16.4875	Up	2.16e-58	6.07e-57
MLOC_66998.1	Predicted protein (Uncharacterized protein)	chalcone synthase	1239	0	926	0.001	75.6576	16.2072	Up	3.85e-237	3.75e-235
AK359941	Hordeum vulgare subsp. vulgare mRNA for predicted protein, complete cds, clone: NIASHv1107B18	skp1 protein	507	0	373	0.001	74.4756	16.1845	Up	6.28e-96	2.75e-94
AK357931	Hordeum vulgare subsp. vulgare mRNA for predicted protein, complete cds, clone: NIASHv1065C14	2770663 r40g2 protein	918	0	585	0.001	64.5099	15.9772	Up	4.59e-150	3.01e-148
AK248871.1	-	cationic amino acid partial	1281	0	748	0.001	59.1106	15.8511	Up	1.09e-191	9.01e-190
MLOC_21496.2	Uncharacterized protein	2612018 protein	891	0	373	0.001	42.3783	15.371	Up	6.28e-96	2.75e-94
MLOC_18385.1	Uncharacterized protein	bifunctional inhibitor lipid-transfer protein seed storage 2s albumin superfamily protein	378	0	150	0.001	40.171	15.2939	Up	5.52e-39	1.07e-37
MLOC_66363.2	Uncharacterized protein	extracellular ribonuclease le precursor	756	0	284	0.001	38.0285	15.2148	Up	3.35e-73	1.14e-71
AK372851	Hordeum vulgare subsp. vulgare mRNA for predicted protein, complete cds, clone: NIASHv3014E09	904233 leucine-rich repeat protein	489	0	180	0.001	37.2629	15.1855	Up	1.21e-46	2.76e-45
MLOC_16041.1	Uncharacterized protein	plant invertase pectin methylesterase inhibitor domain-containing protein	597	0	202	0.001	34.2523	15.0639	Up	2.91e-52	7.32e-51
MLOC_78521.1	Uncharacterized protein	sant myb protein	252	0	85	0.001	34.1453	15.0594	Up	2.19e-22	2.6e-21
AK376764	Hordeum vulgare subsp. vulgare mRNA for predicted protein, complete cds, clone: NIASHv3135C01	protein	1389	0	448	0.001	32.6504	14.9948	Up	4.43e-115	2.31e-113
AK369485	Hordeum vulgare subsp. vulgare mRNA for predicted protein, complete cds, clone: NIASHv2092D21	tpa: cellulose synthase-like family protein	2571	0	821	0.001	32.3262	14.9804	Up	2.5e-210	2.23e-208
MLOC_61669.1	Uncharacterized protein	PREDICTED: uncharacterized protein LOC100824735	234	0	74	0.001	32.0132	14.9664	Up	1.41e-19	1.49e-18
AK248479.1	-	f-box kelch-repeat protein skip4-like	1038	0	328	0.001	31.9882	14.9653	Up	1.94e-84	7.58e-83
AK357400	Hordeum vulgare subsp. vulgare mRNA for predicted protein, partial cds, clone: NIASHv1052H04	e3 ubiquitin-protein ligase rha1b-like	375	0	117	0.001	31.584	14.9469	Up	1.48e-30	2.3e-29
MLOC_38646.1	Predicted protein (Uncharacterized protein)	pectinesterase inhibitor domain containing protein	618	0	191	0.001	31.2866	14.9333	Up	1.87e-49	4.45e-48
AK375855	Hordeum vulgare subsp. vulgare mRNA for predicted protein, complete cds, clone: NIASHv3107M21	hat family dimerisation domain containing protein	1416	0	428	0.001	30.598	14.9012	Up	5.66e-110	2.84e-108
MLOC_26846.1	Uncharacterized protein	69573 zinc-binding	645	0	192	0.001	30.1338	14.8791	Up	1.04e-49	2.48e-48
MLOC_16261.1	Uncharacterized protein	-1 protein	600	0	151	0.001	25.4764	14.6369	Up	3.07e-39	5.99e-38
MLOC_47606.1	Uncharacterized protein	basic blue	366	0	86	0.001	23.7865	14.5379	Up	1.22e-22	1.47e-21
AK252827.1	-	2646418 chain covalent adduct between polyamine oxidase and n1ethyln11 ( methyl) at ph	1485	0	337	0.001	22.9729	14.4876	Up	9.78e-87	3.93e-85
AK360670	Hordeum vulgare subsp. vulgare mRNA for predicted protein, complete cds, clone: NIASHv1122P17	722423 lipid transfer protein	345	0	75	0.001	22.0067	14.4257	Up	7.83e-20	8.39e-19
AK376543	Hordeum vulgare subsp. vulgare mRNA for predicted protein, complete cds, clone: NIASHv3127E05	33743 os01g0106500	639	0	135	0.001	21.3868	14.3844	Up	3.74e-35	6.53e-34
MLOC_77504.1	Uncharacterized protein (Fragment)	nadh dehydrogenase nd2	108	0	22	0.001	20.6211	14.3318	Up	2.68e-06	1.11e-05
MLOC_13245.1	Uncharacterized protein	1907916 tpa: carboxyl-terminal peptidase	1188	0	240	0.001	20.4507	14.3199	Up	5.76e-62	1.71e-60
AK370683	Hordeum vulgare subsp. vulgare mRNA for predicted protein, complete cds, clone: NIASHv2114J14	60s ribosomal protein mitochondrial-like	357	0	63	0.001	17.8643	14.1248	Up	9.08e-17	8.5e-16
MLOC_10899.1	Leucoanthocyanidin reductase (EC 1.17.1.3) (Predicted protein) (Uncharacterized protein)	leucoanthocyanidin reductase	1056	0	178	0.001	17.0635	14.0586	Up	3.91e-46	8.9e-45
MLOC_6041.1	Uncharacterized protein	transcription factor gamyb-like	1281	0	214	0.001	16.9113	14.0457	Up	2.51e-55	6.66e-54
AK363547	Hordeum vulgare subsp. vulgare mRNA for predicted protein, complete cds, clone: NIASHv2016J04	2605932 protein	888	0	146	0.001	16.6438	14.0227	Up	5.8e-38	1.1e-36
MLOC_17358.1	Predicted protein (Uncharacterized protein)	erg28 like protein	426	0	66	0.001	15.6837	13.937	Up	1.56e-17	1.51e-16
AK372789	Hordeum vulgare subsp. vulgare mRNA for predicted protein, complete cds, clone: NIASHv3012N18	protein iq-domain 1-like	1497	0	231	0.001	15.6208	13.9312	Up	1.14e-59	3.27e-58
AK364111	Hordeum vulgare subsp. vulgare mRNA for predicted protein, complete cds, clone: NIASHv2021N11	1040737 ef-hand containing	1128	0	171	0.001	15.3462	13.9056	Up	2.4e-44	5.23e-43
MLOC_62883.1	Uncharacterized protein	invertase inhibitor	615	0	90	0.001	14.8143	13.8547	Up	1.16e-23	1.46e-22
MLOC_1315.1	Predicted protein (Uncharacterized protein)	pectinmethylesterase inhibitor	540	0	78	0.001	14.6222	13.8359	Up	1.34e-20	1.48e-19
AK357890	Hordeum vulgare subsp. vulgare mRNA for predicted protein, complete cds, clone: NIASHv1064D24	pore-forming toxin-like protein hfr-2	1524	0	216	0.001	14.3477	13.8085	Up	7.74e-56	2.07e-54
AK375038	Hordeum vulgare subsp. vulgare mRNA for predicted protein, complete cds, clone: NIASHv3084A05	5a2 protein precursor	387	0	54	0.001	14.1252	13.786	Up	1.8e-14	1.48e-13
MLOC_38034.1	Uncharacterized protein	771776 invertase inhibitor homolog	552	0	73	0.001	13.3874	13.7086	Up	2.54e-19	2.66e-18
AK248200.1	-	2614069 protein	780	0	103	0.001	13.3677	13.7065	Up	5.55e-27	7.76e-26
MLOC_41452.1	Uncharacterized protein	predicted protein	246	0	32	0.001	13.1682	13.6848	Up	7.49e-09	4.07e-08
MLOC_17891.1	Uncharacterized protein	protein srg1-like	510	0	63	0.001	12.505	13.6102	Up	9.08e-17	8.5e-16
MLOC_28859.1	Uncharacterized protein	chemocyanin precursor	366	0	44	0.001	12.1698	13.571	Up	6.46e-12	4.49e-11
MLOC_71845.1	Uncharacterized protein	2608577 protein	1431	0	172	0.001	12.1675	13.5707	Up	1.33e-44	2.93e-43
AK249150.1	-	proline-rich protein	534	0	64	0.001	12.1325	13.5666	Up	5.04e-17	4.78e-16
AK365563	Hordeum vulgare subsp. vulgare mRNA for predicted protein, complete cds, clone: NIASHv2035A21	2607816 protein	936	0	112	0.001	12.1131	13.5643	Up	2.79e-29	4.17e-28
AK249652.1	-	probable phospholipid hydroperoxide glutathione peroxidase mitochondrial-like	495	0	58	0.001	11.8614	13.534	Up	1.72e-15	1.49e-14
AK248822.1	-	2506354 expansin os-expa2	747	0	82	0.001	11.1124	13.4399	Up	1.28e-21	1.48e-20
MLOC_16642.1	Uncharacterized protein	-1 protein	957	0	98	0.001	10.3664	13.3396	Up	1.05e-25	1.41e-24
AK359149	Hordeum vulgare subsp. vulgare mRNA for predicted protein, complete cds, clone: NIASHv1090L24	2705667 precursor thionin	411	0	40	0.001	9.85215	13.2662	Up	6.78e-11	4.35e-10
MLOC_6194.1	Uncharacterized protein	bowman-birk trypsin inhibitor-like protein	276	0	26	0.001	9.53624	13.2192	Up	2.55e-07	1.18e-06
MLOC_81119.1	Predicted protein (Uncharacterized protein)	protein	1311	0	122	0.001	9.42042	13.2016	Up	7.8e-32	1.26e-30
MLOC_59726.1	Uncharacterized protein	leucine-rich repeat-like protein	1287	0	114	0.001	8.96684	13.1304	Up	8.61e-30	1.32e-28
AK357981	Hordeum vulgare subsp. vulgare mRNA for predicted protein, complete cds, clone: NIASHv1066F21	gata transcription factor family protein	1338	0	118	0.001	8.92768	13.1241	Up	8.2e-31	1.29e-29
AK373769	Hordeum vulgare subsp. vulgare mRNA for predicted protein, complete cds, clone: NIASHv3043E01	727075 os12g0599800	579	0	49	0.001	8.56703	13.0646	Up	3.41e-13	2.58e-12
MLOC_69264.1	Uncharacterized protein	2612671 protein	540	0	45	0.001	8.4359	13.0423	Up	3.59e-12	2.55e-11
MLOC_78076.1	Uncharacterized protein	2902325 protein	390	0	32	0.001	8.30612	13.02	Up	7.49e-09	4.07e-08
AK373922	Hordeum vulgare subsp. vulgare mRNA for predicted protein, complete cds, clone: NIASHv3047K10	protein	1902	0	154	0.001	8.1964	13.0008	Up	5.26e-40	1.05e-38
MLOC_28203.1	Uncharacterized protein	leucine rich repeat family protein	426	0	34	0.001	8.07946	12.98	Up	2.31e-09	1.31e-08
AK248185.1	-	2752855 os07g0646600	1386	0	110	0.001	8.03419	12.9719	Up	9.05e-29	1.34e-27
MLOC_62538.1	Uncharacterized protein	2889837 protein	1143	0	90	0.001	7.97093	12.9605	Up	1.16e-23	1.46e-22
MLOC_50452.1	Uncharacterized protein	1178830 os04g0587200	525	0	41	0.001	7.90565	12.9487	Up	3.77e-11	2.47e-10
AK376358	Hordeum vulgare subsp. vulgare mRNA for predicted protein, complete cds, clone: NIASHv3121K08	f-box kelch-repeat protein at1g67480-like	1155	0	90	0.001	7.88812	12.9455	Up	1.16e-23	1.45e-22
AK363840	Hordeum vulgare subsp. vulgare mRNA for predicted protein, complete cds, clone: NIASHv2019F06	protein	1017	0	79	0.001	7.86356	12.941	Up	7.46e-21	8.34e-20
AK368127	Hordeum vulgare subsp. vulgare mRNA for predicted protein, complete cds, clone: NIASHv2068K18	cathepsin b	1065	0	80	0.001	7.6042	12.8926	Up	4.14e-21	4.69e-20
MLOC_56674.1	Uncharacterized protein	hypothetical protein ZEAMMB73_155830	375	0	28	0.001	7.55857	12.8839	Up	7.86e-08	3.87e-07
MLOC_14435.1	Uncharacterized protein	2604840 protein	666	0	49	0.001	7.44792	12.8626	Up	3.41e-13	2.58e-12
MLOC_34868.1	Uncharacterized protein	1023481 os03g0594700	249	0	18	0.001	7.31789	12.8372	Up	2.81e-05	0.00010231
MLOC_53961.1	Uncharacterized protein	retrotransposon unclassified	1110	0	78	0.001	7.11352	12.7963	Up	1.34e-20	1.48e-19
AK375625	Hordeum vulgare subsp. vulgare mRNA for predicted protein, complete cds, clone: NIASHv3099K09	2879544 os02g0778500	1269	0	87	0.001	6.94018	12.7608	Up	6.76e-23	8.25e-22
MLOC_63017.1	Uncharacterized protein	f-box fbd lrr-repeat protein at4g03220-like	786	0	53	0.001	6.826	12.7368	Up	3.25e-14	2.62e-13
MLOC_57898.2	Predicted protein (Uncharacterized protein)	basic blue	366	0	24	0.001	6.63809	12.6966	Up	8.26e-07	3.63e-06
MLOC_78774.1	Uncharacterized protein	2840914 os08g0142900	573	0	37	0.001	6.53672	12.6744	Up	3.96e-10	2.39e-09
MLOC_14012.1	Uncharacterized protein	protein	1374	0	86	0.001	6.33614	12.6294	Up	1.22e-22	1.47e-21
AK363281	Hordeum vulgare subsp. vulgare mRNA for predicted protein, complete cds, clone: NIASHv2013P07	k(+) efflux antiporter chloroplastic-like	2007	0	122	0.001	6.15354	12.5872	Up	7.8e-32	1.26e-30
MLOC_75951.1	Uncharacterized protein	sant myb protein	252	0	15	0.001	6.02565	12.5569	Up	0.000164182	0.000531358
MLOC_22984.1	Uncharacterized protein	heavy metal associated domain-containing protein	369	0	20	0.001	5.48677	12.4217	Up	8.68e-06	3.38e-05
MLOC_201.1	Uncharacterized protein	chemocyanin precursor	372	0	20	0.001	5.44252	12.4101	Up	8.68e-06	3.38e-05
MLOC_13375.1	Uncharacterized protein	49605 transcription factor 1	1995	0	107	0.001	5.42942	12.4066	Up	5.28e-28	7.61e-27
AK372660	Hordeum vulgare subsp. vulgare mRNA for predicted protein, partial cds, clone: NIASHv3008J11	1712400 qltg3-1	339	0	18	0.001	5.37509	12.3921	Up	2.81e-05	0.000102241
MLOC_78417.1	Uncharacterized protein	tpa: protein phosphatase 2c family protein	705	0	37	0.001	5.31283	12.3753	Up	3.96e-10	2.39e-09
AK370562	Hordeum vulgare subsp. vulgare mRNA for predicted protein, complete cds, clone: NIASHv2112H22	hat family dimerization domain-containing protein	858	0	45	0.001	5.30931	12.3743	Up	3.59e-12	2.55e-11
MLOC_38560.1	Uncharacterized protein	rna binding protein	921	0	48	0.001	5.27588	12.3652	Up	6.15e-13	4.58e-12
MLOC_61532.1	Predicted protein (Uncharacterized protein)	purine permease	1221	0	63	0.001	5.22321	12.3507	Up	9.08e-17	8.5e-16
AK251849.1	-	protein mei2-like 4-like	1242	0	64	0.001	5.2164	12.3488	Up	5.04e-17	4.78e-16
MLOC_35529.1	Uncharacterized protein	protein	498	0	25	0.001	5.08187	12.3111	Up	4.59e-07	2.07e-06
MLOC_65533.1	Uncharacterized protein	gibberellin-regulated protein	360	0	18	0.001	5.06154	12.3054	Up	2.81e-05	0.00010219
AK364898	Hordeum vulgare subsp. vulgare mRNA for predicted protein, partial cds, clone: NIASHv2029D19	protein kinase superfamily protein	1635	0	80	0.001	4.95319	12.2741	Up	4.14e-21	4.69e-20
MLOC_10339.1	Uncharacterized protein	-1 protein	834	0	40	0.001	4.8552	12.2453	Up	6.78e-11	4.35e-10
MLOC_10053.1	Uncharacterized protein	proline-rich protein precursor	843	0	40	0.001	4.80336	12.2298	Up	6.78e-11	4.35e-10
MLOC_22809.1	Uncharacterized protein	protein	654	0	30	0.001	4.64362	12.181	Up	2.43e-08	1.25e-07
MLOC_5043.1	Uncharacterized protein	1029128 at3g22845 mwi23_22	699	0	32	0.001	4.63432	12.1781	Up	7.49e-09	4.07e-08
AK376262	Hordeum vulgare subsp. vulgare mRNA for predicted protein, complete cds, clone: NIASHv3119G17	anther-specific protein	729	0	33	0.001	4.58247	12.1619	Up	4.16e-09	2.31e-08
MLOC_78576.1	Uncharacterized protein	1219980 os07g0515700	672	0	30	0.001	4.51923	12.1419	Up	2.43e-08	1.25e-07
MLOC_17346.2	Uncharacterized protein	bidirectional sugar transporter sweet6b-like	741	0	33	0.001	4.50826	12.1384	Up	4.16e-09	2.31e-08
AK361123	Hordeum vulgare subsp. vulgare mRNA for predicted protein, complete cds, clone: NIASHv1132O14	1636228 os09g0309500	666	0	29	0.001	4.40795	12.1059	Up	4.37e-08	2.2e-07
AK249751.1	-	abscisic stress ripening	414	0	18	0.001	4.40134	12.1037	Up	2.81e-05	0.000102224
MLOC_62422.1	Predicted protein (Uncharacterized protein)	snf1-related protein kinase regulatory subunit beta-1-like	858	0	37	0.001	4.36543	12.0919	Up	3.96e-10	2.39e-09
AK249066.1	-	1665687 os03g0241400	849	0	36	0.001	4.29247	12.0676	Up	7.13e-10	4.21e-09
AK249159.1	-	cyclin h-1	999	0	42	0.001	4.25595	12.0553	Up	2.09e-11	1.4e-10
AK359871	Hordeum vulgare subsp. vulgare mRNA for predicted protein, complete cds, clone: NIASHv1105C06	catalytic hydrolase	480	0	20	0.001	4.21795	12.0423	Up	8.68e-06	3.38e-05
AK354554	Hordeum vulgare subsp. vulgare mRNA for predicted protein, complete cds, clone: NIASHv1008G18	1901424 harpin-induced protein	723	0	30	0.001	4.20045	12.0363	Up	2.43e-08	1.25e-07
MLOC_78880.1	Uncharacterized protein	basic blue	366	0	15	0.001	4.14881	12.0185	Up	0.000164182	0.000531121
MLOC_24849.2	Uncharacterized protein	kinesin heavy chain isoform	405	0	16	0.001	3.99924	11.9655	Up	9.12e-05	0.000306687
AK371947	Hordeum vulgare subsp. vulgare mRNA for predicted protein, complete cds, clone: NIASHv2143M09	probable plastid-lipid-associated protein chloroplastic-like	513	0	20	0.001	3.94662	11.9464	Up	8.68e-06	3.38e-05
MLOC_4832.2	Uncharacterized protein	thiosulfate chloroplastic-like	387	0	15	0.001	3.92368	11.938	Up	0.000164182	0.000531043
AK375435	Hordeum vulgare subsp. vulgare mRNA for predicted protein, complete cds, clone: NIASHv3094D20	expansin expa2	774	0	30	0.001	3.92368	11.938	Up	2.43e-08	1.25e-07
MLOC_59030.1	Uncharacterized protein	1909347 cs 5	1098	0	42	0.001	3.87222	11.9189	Up	2.09e-11	1.4e-10
AK358948	Hordeum vulgare subsp. vulgare mRNA for predicted protein, complete cds, clone: NIASHv1086D15	599622 nb-arc domain containing expressed	2985	0	114	0.001	3.8661	11.9167	Up	8.61e-30	1.32e-28
MLOC_64293.1	Uncharacterized protein	pollen surface protein	669	0	24	0.001	3.6316	11.8264	Up	8.26e-07	3.63e-06
MLOC_16.1	Uncharacterized protein	hypothetical protein SORBIDRAFT_02g035795	474	0	17	0.001	3.63064	11.826	Up	5.07e-05	0.000177398
MLOC_63000.1	Uncharacterized protein	2881468 germin-like protein	648	0	23	0.001	3.59307	11.811	Up	1.49e-06	6.35e-06
MLOC_53612.2	Uncharacterized protein	heavy-metal-associated domain-containing	1140	0	40	0.001	3.55196	11.7944	Up	6.78e-11	4.36e-10
MLOC_20899.1	Uncharacterized protein	1636831 os10g0549850	579	0	20	0.001	3.49675	11.7718	Up	8.68e-06	3.38e-05
AK249685.1	-	2535141 at4g37930 f20d10_50	1530	0	51	0.001	3.37436	11.7204	Up	1.05e-13	8.23e-13
MLOC_7523.1	Uncharacterized protein	harpin-induced protein 1 containing expressed	660	0	21	0.001	3.22098	11.6533	Up	4.82e-06	1.93e-05
MLOC_69072.2	Uncharacterized protein	77850 myb dna-binding domain superfamily protein	600	0	19	0.001	3.20564	11.6464	Up	1.56e-05	5.88e-05
AK362403	Hordeum vulgare subsp. vulgare mRNA for predicted protein, partial cds, clone: NIASHv2004M03	protein cypro4-like	969	0	30	0.001	3.13408	11.6138	Up	2.43e-08	1.25e-07
AK373255	Hordeum vulgare subsp. vulgare mRNA for predicted protein, complete cds, clone: NIASHv3025E23	protein hothead-like	1767	0	54	0.001	3.09364	11.5951	Up	1.8e-14	1.48e-13
AK377101	Hordeum vulgare subsp. vulgare mRNA for predicted protein, partial cds, clone: NIASHv3148E12	2613648 protein	1992	0	58	0.001	2.94748	11.5253	Up	1.72e-15	1.49e-14
MLOC_51364.3	Uncharacterized protein	btb poz domain-containing protein at5g47800-like	1716	0	49	0.001	2.89062	11.4972	Up	3.41e-13	2.58e-12
AK361371	Hordeum vulgare subsp. vulgare mRNA for predicted protein, complete cds, clone: NIASHv1139A20	squamosa promoter-binding-like protein 1-like	984	0	28	0.001	2.88055	11.4921	Up	7.86e-08	3.87e-07
MLOC_66781.1	Uncharacterized protein	dead box helicase	834	0	23	0.001	2.79174	11.4469	Up	1.49e-06	6.35e-06
MLOC_56233.1	Sulfotransferase (EC 2.8.2.-)	flavonol sulfotransferase-like	1068	0	29	0.001	2.74878	11.4246	Up	4.37e-08	2.2e-07
AK376503	Hordeum vulgare subsp. vulgare mRNA for predicted protein, partial cds, clone: NIASHv3126B16	probable lrr receptor-like serine threonine-protein kinase at3g47570-like	3198	0	86	0.001	2.72228	11.4106	Up	1.22e-22	1.47e-21
AK358598	Hordeum vulgare subsp. vulgare mRNA for predicted protein, complete cds, clone: NIASHv1079K10	leucoanthocyanidin dioxygenase	1056	0	28	0.001	2.68415	11.3903	Up	7.86e-08	3.87e-07
MLOC_5353.1	Uncharacterized protein	2614115 protein	771	0	20	0.001	2.62596	11.3586	Up	8.68e-06	3.38e-05
MLOC_12108.2	Uncharacterized protein	598875 os11g0249300	2283	0	58	0.001	2.57179	11.3286	Up	1.72e-15	1.49e-14
MLOC_53940.1	Uncharacterized protein	2831968 ternary complex factor-like	1563	0	39	0.001	2.52591	11.3026	Up	1.22e-10	7.7e-10
MLOC_79568.1	Predicted protein (Uncharacterized protein)	early nodulin-like protein 3 precursor	612	0	15	0.001	2.48115	11.2768	Up	0.000164182	0.000531279
AK353778	Hordeum vulgare subsp. vulgare mRNA for predicted protein, partial cds, clone: NIASHv1002L08	probable receptor-like protein kinase at1g67000-like	1065	0	26	0.001	2.47136	11.2711	Up	2.55e-07	1.18e-06
AK374609	Hordeum vulgare subsp. vulgare mRNA for predicted protein, complete cds, clone: NIASHv3070I06	1850646 os08g0557300	1032	0	25	0.001	2.4523	11.2599	Up	4.59e-07	2.07e-06
AK363491	Hordeum vulgare subsp. vulgare mRNA for predicted protein, complete cds, clone: NIASHv2015O23	2608474 protein	1179	0	28	0.001	2.40413	11.2313	Up	7.86e-08	3.87e-07
MLOC_53242.1	Uncharacterized protein	PREDICTED: uncharacterized protein LOC100836241	972	0	23	0.001	2.39538	11.226	Up	1.49e-06	6.35e-06
MLOC_29207.2	Uncharacterized protein	724603 os11g0678200	957	0	22	0.001	2.32715	11.1843	Up	2.68e-06	1.11e-05
MLOC_5165.1	Predicted protein (Uncharacterized protein)	2881450 nac domain protein nac1	930	0	20	0.001	2.17701	11.0881	Up	8.68e-06	3.38e-05
MLOC_55265.2	Predicted protein (Uncharacterized protein)	1030669 burp domain-containing protein	1122	0	24	0.001	2.16537	11.0804	Up	8.26e-07	3.63e-06
AK371433	Hordeum vulgare subsp. vulgare mRNA for predicted protein, complete cds, clone: NIASHv2133P15	bcl-2 binding anthanogene-1	777	0	16	0.001	2.08455	11.0255	Up	9.12e-05	0.000306404
MLOC_12844.1	Uncharacterized protein	galactoside 2-alpha-l-fucosyltransferase-like	1167	0	24	0.001	2.08187	11.0237	Up	8.26e-07	3.63e-06
MLOC_74282.1	Uncharacterized protein	transposon mutator sub-class	792	0	16	0.001	2.04507	10.9979	Up	9.12e-05	0.000306735
AK372807	Hordeum vulgare subsp. vulgare mRNA for predicted protein, complete cds, clone: NIASHv3013G11	predicted protein	693	0	14	0.001	2.04507	10.9979	Up	0.000295584	0.000912279
MLOC_76508.1	Uncharacterized protein	major allergen phl p 5	894	0	18	0.001	2.03821	10.9931	Up	2.81e-05	0.000102207
MLOC_62265.2	E3 ubiquitin-protein ligase (EC 6.3.2.-)	e3 ubiquitin-protein ligase sina-like 10-like	897	0	18	0.001	2.03139	10.9883	Up	2.81e-05	0.000102258
AK365704	Hordeum vulgare subsp. vulgare mRNA for predicted protein, complete cds, clone: NIASHv2036H18	2163746 nbs-lrr class disease resistance protein	2868	0	55	0.001	1.94132	10.9228	Up	1e-14	8.35e-14
AK374718	Hordeum vulgare subsp. vulgare mRNA for predicted protein, partial cds, clone: NIASHv3074B15	ubiquitin-protein expressed	984	0	18	0.001	1.85178	10.8547	Up	2.81e-05	0.000102156
MLOC_51594.1	Uncharacterized protein	1635363 os07g0199250	882	0	16	0.001	1.83639	10.8427	Up	9.12e-05	0.000306499
AK366178	Hordeum vulgare subsp. vulgare mRNA for predicted protein, complete cds, clone: NIASHv2040O04	transposon en spm sub-class	1443	0	26	0.001	1.82398	10.8329	Up	2.55e-07	1.18e-06
AK375437	Hordeum vulgare subsp. vulgare mRNA for predicted protein, complete cds, clone: NIASHv3094E12	2799845 f-box protein family-like	783	0	14	0.001	1.81	10.8218	Up	0.000295584	0.000913053
MLOC_37268.1	Pectinesterase (EC 3.1.1.11)	pectin methylesterase	1254	0	22	0.001	1.77598	10.7944	Up	2.68e-06	1.11e-05
MLOC_53949.2	Uncharacterized protein	piriformospora indica-insensitive protein 2-like	1371	0	24	0.001	1.77209	10.7912	Up	8.26e-07	3.63e-06
AK369990	Hordeum vulgare subsp. vulgare mRNA for predicted protein, complete cds, clone: NIASHv2102N15	723945 os11g0100300	2592	0	44	0.001	1.71843	10.7469	Up	6.46e-12	4.49e-11
MLOC_56512.1	Uncharacterized protein	spz12_orysj ame: full= serpin-z12 ame: full= 12	1314	0	22	0.001	1.69488	10.727	Up	2.68e-06	1.11e-05
AK377088	Hordeum vulgare subsp. vulgare mRNA for predicted protein, complete cds, clone: NIASHv3148A11	2770532 mitochondrial+prohibitin+complex+protein+2	1749	0	29	0.001	1.6785	10.713	Up	4.37e-08	2.2e-07
MLOC_78515.1	Uncharacterized protein	2607290 protein	1209	0	20	0.001	1.67462	10.7096	Up	8.68e-06	3.38e-05
MLOC_12999.1	Uncharacterized protein	two-component response regulator arr12-like	1704	0	28	0.001	1.66342	10.6999	Up	7.86e-08	3.87e-07
AK356510	Hordeum vulgare subsp. vulgare mRNA for predicted protein, complete cds, clone: NIASHv1035K19	2883541 at-hook protein 1	1098	0	18	0.001	1.65952	10.6966	Up	2.81e-05	0.000102327
MLOC_69588.2	Uncharacterized protein	8-amino-7-oxononanoate synthase	1362	0	22	0.001	1.63515	10.6752	Up	2.68e-06	1.11e-05
MLOC_15042.1	Predicted protein (Uncharacterized protein)	2605986 protein	1131	0	18	0.001	1.6111	10.6538	Up	2.81e-05	0.000102293
MLOC_6871.2	Uncharacterized protein	1851899 os12g0102700	951	0	15	0.001	1.5967	10.6409	Up	0.000164182	0.0005312
MLOC_8870.1	3-ketoacyl-CoA synthase (EC 2.3.1.-)	3-ketoacyl- synthase 6-like	1461	0	23	0.001	1.59364	10.6381	Up	1.49e-06	6.35e-06
AK248736.1	-	citrate synthase 4	1416	0	22	0.001	1.5728	10.6191	Up	2.68e-06	1.11e-05
MLOC_69959.1	Pectinesterase (EC 3.1.1.11)	probable pectinesterase pectinesterase inhibitor 21-like	1386	0	21	0.001	1.5338	10.5829	Up	4.82e-06	1.93e-05
AK358680	Hordeum vulgare subsp. vulgare mRNA for predicted protein, complete cds, clone: NIASHv1081G17	f-box family protein	1338	0	20	0.001	1.51317	10.5634	Up	8.68e-06	3.37e-05
AK366265	Hordeum vulgare subsp. vulgare mRNA for predicted protein, partial cds, clone: NIASHv2041J01	peptide transporter ptr2-like	1431	0	20	0.001	1.41483	10.4664	Up	8.68e-06	3.38e-05
MLOC_62332.1	Peroxidase (EC 1.11.1.7)	peroxidase 15-like	1011	0	14	0.001	1.40181	10.4531	Up	0.000295584	0.000912537
MLOC_31208.2	Uncharacterized protein	chaperone protein 1-like	1683	0	23	0.001	1.38343	10.434	Up	1.49e-06	6.35e-06
MLOC_2395.1	Uncharacterized protein	resistance protein rga2	1392	0	19	0.001	1.38174	10.4323	Up	1.56e-05	5.88e-05
AK249590.1	-	2250088 60s ribosomal protein l13-2	624	2	3342	0.405396	542.169	10.3852	Up	0	0
MLOC_75135.1	Uncharacterized protein	ap2 erf and b3 domain-containing transcription repressor tem1-like	1086	0	14	0.001	1.305	10.3498	Up	0.000295584	0.000912795
AK373374	Hordeum vulgare subsp. vulgare mRNA for predicted protein, partial cds, clone: NIASHv3028M14	probable glucan endo- -beta-glucosidase a6-like	1242	0	16	0.001	1.3041	10.3488	Up	9.12e-05	0.00030664
AK250054.1	-	f-box lrr-repeat protein 14-like	1455	0	18	0.001	1.25234	10.2904	Up	2.81e-05	0.000102276
AK353780	Hordeum vulgare subsp. vulgare mRNA for predicted protein, complete cds, clone: NIASHv1002L14	upf0481 protein at3g47200-like	1494	0	18	0.001	1.21965	10.2523	Up	2.81e-05	0.000102139
AK375615	Hordeum vulgare subsp. vulgare mRNA for predicted protein, complete cds, clone: NIASHv3099I02	leucine rich repeat family expressed	2028	0	24	0.001	1.198	10.2264	Up	8.26e-07	3.63e-06
MLOC_74641.2	Uncharacterized protein	599622 nb-arc domain containing expressed	2289	0	27	0.001	1.19407	10.2217	Up	1.42e-07	6.77e-07
AK368401	Hordeum vulgare subsp. vulgare mRNA for predicted protein, complete cds, clone: NIASHv2073B01	1411861 os11g0278300	1779	0	20	0.001	1.13806	10.1524	Up	8.68e-06	3.38e-05
MLOC_56413.1	Uncharacterized protein	subtilisin-like protease sdd1-like	2256	0	25	0.001	1.1218	10.1316	Up	4.59e-07	2.07e-06
AK369149	Hordeum vulgare subsp. vulgare mRNA for predicted protein, partial cds, clone: NIASHv2085N19	protein	1290	0	14	0.001	1.09863	10.1015	Up	0.000295584	0.000911892
MLOC_64430.1	Uncharacterized protein	f-box protein	1623	0	17	0.001	1.06034	10.0503	Up	5.07e-05	0.000177426
AK374018	Hordeum vulgare subsp. vulgare mRNA for predicted protein, partial cds, clone: NIASHv3051E03	1848851 partial	2199	0	22	0.001	1.01277	9.98409	Up	2.68e-06	1.11e-05
AK360305	Hordeum vulgare subsp. vulgare mRNA for predicted protein, complete cds, clone: NIASHv1115B19	863875 cyt-p450 monooxygenase	1476	0	14	0.001	0.960184	9.90717	Up	0.000295584	0.000913441
MLOC_6153.1	Uncharacterized protein	galactoside 2-alpha-l-fucosyltransferase-like	1491	0	14	0.001	0.950524	9.89258	Up	0.000295584	0.000912408
AK364669	Hordeum vulgare subsp. vulgare mRNA for predicted protein, complete cds, clone: NIASHv2027G19	beta-amyrin synthase	2154	0	20	0.001	0.939934	9.87642	Up	8.68e-06	3.38e-05
MLOC_16156.2	Uncharacterized protein	disease resistance protein rpp8-like	2223	0	20	0.001	0.910759	9.83093	Up	8.68e-06	3.38e-05
MLOC_19551.1	Non-specific lipid-transfer protein	2648763 chain lipid binding in rice nonspecific lipid transfer protein-1 complexes from oryza sativa	360	1	1121	0.351343	315.222	9.80927	Up	3.09e-284	3.65e-282
MLOC_51239.1	Uncharacterized protein	type ii nad h dehydrogenase	1719	0	15	0.001	0.883341	9.78683	Up	0.000164182	0.000530885
AK356606	Hordeum vulgare subsp. vulgare mRNA for predicted protein, complete cds, clone: NIASHv1036M24	13908 protein	1986	0	16	0.001	0.815556	9.67164	Up	9.12e-05	0.000306451
MLOC_55908.1	Uncharacterized protein	pectinesterase inhibitor domain containing protein	633	1	989	0.199816	158.163	9.62853	Up	1.39e-250	1.43e-248
AK251401.1	-	protein wax2-like	1857	0	14	0.001	0.763184	9.57589	Up	0.000295584	0.000912666
AK357160	Hordeum vulgare subsp. vulgare mRNA for predicted protein, partial cds, clone: NIASHv1047E12	duf827 domain containing family protein	2127	0	16	0.001	0.761492	9.57269	Up	9.12e-05	0.000306546
AK373297	Hordeum vulgare subsp. vulgare mRNA for predicted protein, complete cds, clone: NIASHv3026F15	tpa: protein kinase superfamily protein	2286	0	17	0.001	0.75281	9.55614	Up	5.07e-05	0.00017737
MLOC_44297.1	Uncharacterized protein	1636340 os09g0421600	2424	0	18	0.001	0.751714	9.55404	Up	2.81e-05	0.000102173
MLOC_39533.1	Uncharacterized protein	l-type lectin-domain containing receptor kinase -like	2058	0	15	0.001	0.737834	9.52715	Up	0.000164182	0.000530964
MLOC_4401.1	Uncharacterized protein	1634018 os04g0431700	3084	0	22	0.001	0.72214	9.49613	Up	2.68e-06	1.11e-05
AK376529	Hordeum vulgare subsp. vulgare mRNA for predicted protein, complete cds, clone: NIASHv3126N04	1665422 domain containing expressed	2454	0	16	0.001	0.660022	9.36637	Up	9.12e-05	0.000306593
AK361215	Hordeum vulgare subsp. vulgare mRNA for predicted protein, complete cds, clone: NIASHv1135D07	wall-associated receptor kinase 2-like	2238	0	14	0.001	0.633258	9.30665	Up	0.000295584	0.000912924
AK370232	Hordeum vulgare subsp. vulgare mRNA for predicted protein, complete cds, clone: NIASHv2107F12	2163746 nbs-lrr class disease resistance protein	2586	0	16	0.001	0.626332	9.29078	Up	9.12e-05	0.000306357
MLOC_1230.1	Uncharacterized protein	probable beta-d-xylosidase 5-like	2445	0	14	0.001	0.579645	9.17903	Up	0.000295584	0.000912021
AK369515	Hordeum vulgare subsp. vulgare mRNA for predicted protein, complete cds, clone: NIASHv2092L06	disease resistance rpp13-like protein 3-like	4113	0	22	0.001	0.541473	9.08075	Up	2.68e-06	1.11e-05
MLOC_14606.2	Plastidial ADP-glucose transporter (Uncharacterized protein)	adp-glucose brittle-1 transporter precursor	1275	6	4040	0.595216	320.763	9.07388	Up	0	0
MLOC_61742.1	Uncharacterized protein	uncharacterized mscs family protein at1g78610-like	2673	0	14	0.001	0.530203	9.0504	Up	0.000295584	0.000913182
MLOC_66001.1	Glutamate receptor	glutamate receptor -like	2799	0	14	0.001	0.506335	8.98395	Up	0.000295584	0.00091215
MLOC_58539.1	Uncharacterized protein	protein kinase xa21	3165	0	14	0.001	0.447783	8.80665	Up	0.000295584	0.000913311
MLOC_51430.2	Uncharacterized protein	1848680 os04g0381500	420	2	1030	0.602302	248.257	8.68713	Up	1.13e-258	1.18e-256
MLOC_47994.1	Uncharacterized protein	pectinesterase inhibitor domain containing protein	438	6	3063	1.73265	707.923	8.67447	Up	0	0
AK367845	Hordeum vulgare subsp. vulgare mRNA for predicted protein, complete cds, clone: NIASHv2063H18	2610323 protein	945	2	956	0.26769	102.409	8.57957	Up	7.65e-240	7.56e-238
AK248622.1	-	sucrose synthase	2424	76	35264	3.96565	1472.69	8.53668	Up	0	0
MLOC_60587.1	Uncharacterized protein	1634204 os04g0599650	8262	0	26	0.001	0.318567	8.31545	Up	2.55e-07	1.18e-06
AK376365	Hordeum vulgare subsp. vulgare mRNA for predicted protein, complete cds, clone: NIASHv3121L22	non-specific lipid-transfer protein	366	1	382	0.345583	105.656	8.25613	Up	5.41e-96	2.38e-94
MLOC_10766.1	Uncharacterized protein	defensin precursor	249	1	244	0.507966	99.1981	7.60944	Up	6.02e-61	1.75e-59
AK369350	Hordeum vulgare subsp. vulgare mRNA for predicted protein, complete cds, clone: NIASHv2089K17	nbs-lrr type protein	3288	1	235	0.0384682	7.23517	7.55522	Up	1.15e-58	3.25e-57
MLOC_54768.1	Uncharacterized protein	protein	1335	16	3170	1.51591	240.376	7.30897	Up	0	0
AK376058	Hordeum vulgare subsp. vulgare mRNA for predicted protein, complete cds, clone: NIASHv3113L16	802328 endo-polygalacturonase	1305	9	1736	0.8723	134.664	7.27033	Up	0	0
AK250369.1	-	440320 s-adenosyl-l-methionine: phosphoethanolamine n-methyltransferase	1494	1	156	0.084661	10.5703	6.9641	Up	1.15e-38	2.21e-37
AK373891	Hordeum vulgare subsp. vulgare mRNA for predicted protein, complete cds, clone: NIASHv3046H24	thylakoid-bound ascorbate peroxidase	1338	2	294	0.189063	22.2436	6.87837	Up	8.19e-72	2.76e-70
MLOC_56184.1	Uncharacterized protein		228	3	411	1.66426	182.482	6.77673	Up	1.3e-99	5.97e-98
MLOC_45376.1	Uncharacterized protein	protein	1359	14	1910	1.30299	142.274	6.7707	Up	0	0
AK375117	Hordeum vulgare subsp. vulgare mRNA for predicted protein, complete cds, clone: NIASHv3085K14	pollen allergen phl p	1563	6	804	0.485541	52.0727	6.74479	Up	1.66e-193	1.38e-191
AK375411	Hordeum vulgare subsp. vulgare mRNA for predicted protein, complete cds, clone: NIASHv3093I05	predicted protein	261	9	1137	4.3615	440.994	6.65979	Up	3.19e-272	3.55e-270
AK368117	Hordeum vulgare subsp. vulgare mRNA for predicted protein, complete cds, clone: NIASHv2068H02	851059 class iii chitinase homologue ( hib3h-a)	903	2	213	0.280141	23.8784	6.41341	Up	2.1e-51	5.18e-50
AK252852.1	-	proline-rich protein	1407	6	609	0.539375	43.8163	6.34404	Up	1.98e-144	1.26e-142
MLOC_68931.1	Uncharacterized protein	2441881 defensin	228	1	101	0.554752	44.8435	6.33691	Up	8.33e-25	1.09e-23
MLOC_25063.1	Uncharacterized protein	hybrid signal transduction histidine kinase a-like	165	1	90	0.766566	55.2168	6.17055	Up	4.8e-22	5.64e-21
MLOC_73076.2	Uncharacterized protein	861414 cysteine proteinase (ec -) - rice	1095	4	347	0.46204	32.0795	6.11749	Up	6.81e-82	2.57e-80
AK375506	Hordeum vulgare subsp. vulgare mRNA for predicted protein, complete cds, clone: NIASHv3096E10	1675556 os12g0506700	3159	10	852	0.400391	27.3025	6.09148	Up	5.56e-199	4.78e-197
AK250565.1	-	429408 endo- -beta-glucanase	1863	2	170	0.135785	9.23738	6.08809	Up	1.29e-40	2.6e-39
MLOC_31922.1	Uncharacterized protein	61523 os01g0175500	1323	1	85	0.0956035	6.50387	6.08809	Up	8.59e-21	9.59e-20
MLOC_61101.1	Predicted protein (Uncharacterized protein)	probable carboxylesterase 2-like	1011	7	573	0.875751	57.3742	6.03374	Up	7.93e-134	4.68e-132
MLOC_67523.1	Uncharacterized protein	predicted protein	396	1	78	0.319403	19.9394	5.9641	Up	4.85e-19	5.03e-18
AK365257	Hordeum vulgare subsp. vulgare mRNA for predicted protein, complete cds, clone: NIASHv2032L19	probable receptor-like protein kinase at1g67000-like	2073	1	77	0.0610147	3.76014	5.94549	Up	8.62e-19	8.86e-18
MLOC_18340.1	Uncharacterized protein	angio-associated migratory cell	1194	2	152	0.211865	12.887	5.92663	Up	4.08e-36	7.34e-35
MLOC_36901.3	Uncharacterized protein	1666156 ame: full=probable protein phosphatase 2c 31 short= 2c31	1839	4	303	0.275114	16.6791	5.92187	Up	6.87e-71	2.28e-69
AK374591	Hordeum vulgare subsp. vulgare mRNA for predicted protein, partial cds, clone: NIASHv3069O18	eukaryotic translation initiation factor 5b	2340	8	596	0.432422	25.7836	5.89787	Up	4.7e-138	2.86e-136
AK361627	Hordeum vulgare subsp. vulgare mRNA for predicted protein, complete cds, clone: NIASHv1145F03	translation elongation factor 1a	1380	1	72	0.0916547	5.28161	5.84863	Up	1.53e-17	1.49e-16
AK359904	Hordeum vulgare subsp. vulgare mRNA for predicted protein, complete cds, clone: NIASHv1106C13	2612671 protein	558	1	70	0.226673	12.6992	5.80798	Up	4.82e-17	4.58e-16
MLOC_63510.1	Uncharacterized protein	subtilisin-like protease-like	2226	7	465	0.397747	21.1466	5.73243	Up	7.09e-107	3.47e-105
MLOC_54134.2	Uncharacterized protein	probable o-methyltransferase 2-like	1125	4	240	0.449719	21.5959	5.58559	Up	3.36e-55	8.92e-54
MLOC_14578.3	Uncharacterized protein	calcium binding egf domain containing expressed	2775	2	120	0.0911593	4.37755	5.58559	Up	3.83e-28	5.56e-27
AK367001	Hordeum vulgare subsp. vulgare mRNA for predicted protein, complete cds, clone: NIASHv2049L18	2607000 protein	1296	2	118	0.195191	9.21701	5.56134	Up	1.2e-27	1.71e-26
MLOC_7470.1	Uncharacterized protein	113656 wrky dna-binding protein 49	690	2	116	0.366619	17.0185	5.53668	Up	3.76e-27	5.29e-26
MLOC_64099.1	Uncharacterized protein	probable pectinesterase 29-like	1020	10	579	1.24003	57.4634	5.53419	Up	6.28e-131	3.62e-129
AK251417.1	-	2597604 histone h4	309	1	55	0.409332	18.0184	5.46006	Up	2.6e-13	1.98e-12
MLOC_58108.2	Uncharacterized protein	probable phenylalanyl-trna synthetase alpha chain-like	1548	1	54	0.0817077	3.53131	5.43359	Up	4.59e-13	3.45e-12
MLOC_71329.3	Uncharacterized protein	cell division control protein 6 homolog	1377	2	107	0.183709	7.86616	5.42017	Up	6.4e-25	8.42e-24
MLOC_63282.1	Predicted protein (Uncharacterized protein)	2675341 subtilisin-like serine protease	2232	35	1767	1.98339	80.1411	5.3365	Up	0	0
AK253133.1	-	probable aldehyde oxidase 2-like	4023	32	1555	1.00608	39.1285	5.2814	Up	0	0
MLOC_15707.1	Predicted protein (Uncharacterized protein)	2581189 protein	492	1	48	0.25708	9.87618	5.26366	Up	1.4e-11	9.51e-11
MLOC_80724.3	Uncharacterized protein	1848358 partial	2046	2	94	0.12364	4.65088	5.23329	Up	1.04e-21	1.21e-20
AK374445	Hordeum vulgare subsp. vulgare mRNA for predicted protein, complete cds, clone: NIASHv3064M13	proline-rich protein	651	3	137	0.582873	21.3036	5.19177	Up	4.76e-31	7.53e-30
AK358828	Hordeum vulgare subsp. vulgare mRNA for predicted protein, complete cds, clone: NIASHv1083N18	slt1 protein	1611	4	178	0.31405	11.185	5.15443	Up	7.1e-40	1.41e-38
MLOC_78979.1	Uncharacterized protein	1076862 lgc1	351	28	1221	10.0898	352.145	5.12519	Up	3.21e-265	3.44e-263
MLOC_10310.1	Uncharacterized protein	1849331 partial	1260	2	86	0.200767	6.90941	5.10497	Up	9.68e-20	1.03e-18
MLOC_68625.2	Uncharacterized protein	cytochrome p450	1584	6	253	0.479104	16.1688	5.07673	Up	8.87e-56	2.37e-54
AK376256	Hordeum vulgare subsp. vulgare mRNA for predicted protein, complete cds, clone: NIASHv3119F02	58606 ternary complex factor	1812	2	84	0.139606	4.69282	5.07102	Up	3e-19	3.14e-18
MLOC_81737.1	Uncharacterized protein	2840914 os08g0142900	558	26	1083	5.89349	196.475	5.05908	Up	6.28e-234	6.02e-232
MLOC_10906.1	Uncharacterized protein	white-brown-complex abc transporter family	2382	5	206	0.265498	8.75464	5.04327	Up	1.69e-45	3.78e-44
AK353625	Hordeum vulgare subsp. vulgare mRNA for predicted protein, complete cds, clone: NIASHv1001J07	protein iq-domain 1-like	1452	2	82	0.17422	5.71689	5.03625	Up	9.29e-19	9.54e-18
MLOC_55612.1	Uncharacterized protein	protein	1536	6	243	0.494076	16.015	5.01855	Up	2.51e-53	6.42e-52
MLOC_70.2	Uncharacterized protein	pollen allergen-like protein	462	65	2615	17.7953	572.984	5.00893	Up	0	0
MLOC_43244.1	Histone H2A	histone h2a	456	3	120	0.832128	26.6397	5.00063	Up	7.11e-27	9.92e-26
AK375321	Hordeum vulgare subsp. vulgare mRNA for predicted protein, complete cds, clone: NIASHv3090P05	low quality protein: fbd-associated f-box protein at3g50710-like	1530	2	75	0.165338	4.9623	4.90752	Up	4.8e-17	4.56e-16
MLOC_2259.1	Predicted protein (Uncharacterized protein)	ser thr-rich protein t10 in dgcr region	798	6	223	0.951003	28.2888	4.89464	Up	1.94e-48	4.56e-47
MLOC_37146.1	Uncharacterized protein	leucoanthocyanidin dioxygenase	1098	2	74	0.230389	6.82248	4.88815	Up	8.43e-17	7.9e-16
MLOC_26912.5	Predicted protein (Uncharacterized protein)	714514 pectinacetylesterase precursor	1365	6	222	0.555971	16.4639	4.88815	Up	3.4e-48	7.95e-47
MLOC_80000.1	Predicted protein (Uncharacterized protein)	mannan synthase 1-like	1611	12	439	0.942149	27.5856	4.87181	Up	7.1e-94	3.04e-92
MLOC_62188.1	Predicted protein (Uncharacterized protein)	2245459 5a2 protein	318	11	396	4.37521	126.061	4.84863	Up	1.33e-84	5.21e-83
MLOC_6531.1	Uncharacterized protein	predicted protein	234	6	211	3.24317	91.2808	4.81484	Up	1.63e-45	3.66e-44
MLOC_53016.1	Uncharacterized protein	protein lurp-one-related 11-like	627	1	34	0.201728	5.48939	4.76616	Up	3.82e-08	1.93e-07
MLOC_19160.1	Uncharacterized protein	2441881 defensin	228	51	1724	28.2924	765.447	4.75782	Up	0	0
MLOC_6028.2	Uncharacterized protein	far-red impaired response	333	2	67	0.75966	20.3678	4.74479	Up	4.28e-15	3.63e-14
AK370706	Hordeum vulgare subsp. vulgare mRNA for predicted protein, complete cds, clone: NIASHv2115F22	cell division protein aaa atpase family	1554	5	156	0.406961	10.1622	4.64217	Up	2.56e-33	4.3e-32
AK359780	Hordeum vulgare subsp. vulgare mRNA for predicted protein, partial cds, clone: NIASHv1103A19	heat shock 70 kda mitochondrial-like	2022	4	124	0.250215	6.20802	4.6329	Up	1.08e-26	1.49e-25
AK371010	Hordeum vulgare subsp. vulgare mRNA for predicted protein, partial cds, clone: NIASHv2122C14	udp-glycosyltransferase 76f1-like	498	2	60	0.507966	12.1965	4.58559	Up	2.13e-13	1.63e-12
MLOC_72933.1	Uncharacterized protein	725763 os12g0158700	462	1	29	0.273774	6.35432	4.53668	Up	6.26e-07	2.79e-06
AK353701	Hordeum vulgare subsp. vulgare mRNA for predicted protein, complete cds, clone: NIASHv1002C17	transferase family protein	1059	5	143	0.597183	13.6695	4.51664	Up	3.51e-30	5.43e-29
AK370280	Hordeum vulgare subsp. vulgare mRNA for predicted protein, complete cds, clone: NIASHv2108B12	udp-glycosyltransferase 82a1-like	1518	2	56	0.166645	3.73447	4.48606	Up	1.97e-12	1.42e-11
AK354089	Hordeum vulgare subsp. vulgare mRNA for predicted protein, complete cds, clone: NIASHv1004P04	xylanase inhibitor	990	1	28	0.127761	2.86309	4.48606	Up	1.09e-06	4.74e-06
MLOC_16701.1	Uncharacterized protein	expansine partial	795	1	28	0.159099	3.56536	4.48606	Up	1.09e-06	4.74e-06
MLOC_4958.1	Predicted protein (Uncharacterized protein)	subtilisin-like protease sdd1-like	2235	16	443	0.905474	20.065	4.46986	Up	3.01e-90	1.24e-88
MLOC_64684.2	Predicted protein (Uncharacterized protein)	2421641 defensin	267	33	905	15.6328	343.123	4.45608	Up	1.83e-182	1.45e-180
AK361923	Hordeum vulgare subsp. vulgare mRNA for predicted protein, complete cds, clone: NIASHv2001E23	asparagine synthetase	1425	3	82	0.266281	5.82521	4.45129	Up	1.2e-17	1.18e-16
AK362834	Hordeum vulgare subsp. vulgare mRNA for predicted protein, complete cds, clone: NIASHv2010H06	primary amine oxidase	2109	2	54	0.119946	2.59197	4.43359	Up	5.95e-12	4.15e-11
MLOC_21843.1	Uncharacterized protein	1849132 os04g0640300	594	2	54	0.42587	9.20281	4.43359	Up	5.95e-12	4.15e-11
AK248355.1	-	1909199 kda proline-rich protein	477	1	27	0.265164	5.73005	4.43359	Up	1.9e-06	8.04e-06
AK373094	Hordeum vulgare subsp. vulgare mRNA for predicted protein, complete cds, clone: NIASHv3020P23	1851322 os09g0498700	1392	18	480	1.63556	34.9072	4.41567	Up	6.06e-97	2.7e-95
MLOC_19148.1	Uncharacterized protein	glycerol-3-phosphate acyltransferase 6-like	1533	1	26	0.0825072	1.7169	4.37914	Up	3.31e-06	1.36e-05
MLOC_64651.2	Uncharacterized protein	61442 os06g0134300	1473	1	26	0.0858679	1.78683	4.37914	Up	3.31e-06	1.36e-05
AK355398	Hordeum vulgare subsp. vulgare mRNA for predicted protein, complete cds, clone: NIASHv1020D03	1634259 partial	927	1	26	0.136444	2.83927	4.37914	Up	3.31e-06	1.36e-05
MLOC_72638.2	Histone H2A	histone h2a	414	6	154	1.83309	37.6559	4.36052	Up	9.38e-32	1.51e-30
MLOC_61963.1	Predicted protein (Uncharacterized protein)	chemocyanin precursor	378	4	102	1.33845	27.3163	4.35113	Up	2.11e-21	2.42e-20
MLOC_79518.1	Uncharacterized protein	2879782 os09g0120100	1017	12	305	1.49243	30.3593	4.3464	Up	1.65e-61	4.84e-60
MLOC_68312.1	Uncharacterized protein	phytochrome p450	1542	5	127	0.410128	8.33743	4.34546	Up	2.42e-26	3.31e-25
AK371846	Hordeum vulgare subsp. vulgare mRNA for predicted protein, complete cds, clone: NIASHv2142F06	277826 phosphoinositide 4-kinase gamma 4	1707	6	150	0.444582	8.89551	4.32256	Up	8.46e-31	1.33e-29
MLOC_12145.8	S-acyltransferase (EC 2.3.1.225) (Palmitoyltransferase)	probable s-acyltransferase at3g56930-like	1395	1	25	0.0906691	1.81417	4.32256	Up	5.76e-06	2.29e-05
MLOC_4798.7	Uncharacterized protein	nb-arc domain containing protein	3510	6	148	0.216211	4.26842	4.30319	Up	2.54e-30	3.95e-29
MLOC_72690.1	Uncharacterized protein	1633935 os04g0348800	966	3	72	0.392806	7.54516	4.26366	Up	2.97e-15	2.55e-14
MLOC_8426.1	Uncharacterized protein (Fragment)	chloroplast envelope membrane protein	207	1	24	0.611031	11.7369	4.26366	Up	1e-05	3.86e-05
AK357139	Hordeum vulgare subsp. vulgare mRNA for predicted protein, complete cds, clone: NIASHv1046O11	1294580 o-methyltransferase zrp4	1107	31	736	3.54199	67.3043	4.24807	Up	3e-144	1.9e-142
MLOC_6156.2	Uncharacterized protein	myb-related protein hv33	909	7	164	0.97402	18.2639	4.2289	Up	4.15e-33	6.93e-32
MLOC_77571.1	Uncharacterized protein	protein	2067	1	23	0.0611918	1.12642	4.20226	Up	1.74e-05	6.48e-05
AK371118	Hordeum vulgare subsp. vulgare mRNA for predicted protein, complete cds, clone: NIASHv2125L11	2610409 protein	1893	2	46	0.133633	2.45992	4.20226	Up	4.88e-10	2.92e-09
MLOC_12555.1	Uncharacterized protein	2752619 vacuolar targeting receptor	1689	75	1691	5.61649	101.351	4.17354	Up	0	0
MLOC_38046.3	MLO-like protein	mlo-like protein 1-like	1467	1	22	0.0862191	1.51812	4.13813	Up	3.01e-05	0.000108498
MLOC_59790.1	Uncharacterized protein	aspartic proteinase nepenthesin-1-like	894	18	393	2.54665	44.5008	4.12716	Up	3e-76	1.07e-74
MLOC_63780.6	Uncharacterized protein	1849003 os04g0403400	3051	2	42	0.0829128	1.39354	4.07102	Up	4.33e-09	2.4e-08
MLOC_61922.1	Uncharacterized protein	aspartic proteinase nepenthesin-1-like	1539	14	294	1.1506	19.3384	4.07102	Up	7.2e-57	1.98e-55
MLOC_58693.2	Uncharacterized protein	2688500 protein kinase-like	1254	2	41	0.201728	3.30978	4.03625	Up	7.46e-09	4.06e-08
MLOC_59840.1	Predicted protein (Uncharacterized protein)	726287 ame: full=probable apyrase 3 short= 3 ame: full=atp-diphosphatase ame: full=atp-diphosphohydrolase ame: full=adenosine diphosphatase short=adpase flags: precursor	1392	2	40	0.181729	2.90893	4.00063	Up	1.28e-08	6.83e-08
MLOC_72783.2	MLO-like protein	835247 mlo-like protein 11	1827	1	20	0.0692301	1.10816	4.00063	Up	8.97e-05	0.000302186
MLOC_77989.1	Uncharacterized protein	PREDICTED: uncharacterized protein LOC100824735	237	7	139	3.7358	59.3717	3.99029	Up	3.31e-27	4.67e-26
MLOC_11868.1	Uncharacterized protein	rab gdp dissociation inhibitor alpha-like	1341	4	78	0.377281	5.88815	3.9641	Up	1.03e-15	9.04e-15
AK373961	Hordeum vulgare subsp. vulgare mRNA for predicted protein, complete cds, clone: NIASHv3049F20	2597604 histone h4	309	2	39	0.818663	12.7767	3.9641	Up	2.21e-08	1.15e-07
AK373440	Hordeum vulgare subsp. vulgare mRNA for predicted protein, complete cds, clone: NIASHv3030O05	histone -like isoform 1	453	6	116	1.67528	25.9223	3.95172	Up	9.3e-23	1.13e-21
AK252681.1	-	2576767 rnase s-like protein	735	14	269	2.40921	37.0491	3.94281	Up	5.24e-51	1.28e-49
MLOC_63142.3	Predicted protein (Uncharacterized protein)	1389898 s4 domain	915	1	19	0.138233	2.10206	3.92663	Up	0.000154575	0.000501829
AK249287.1	-	beta-expansin 4 precursor	861	5	95	0.734515	11.1695	3.92663	Up	8.99e-19	9.24e-18
AK358870	Hordeum vulgare subsp. vulgare mRNA for predicted protein, complete cds, clone: NIASHv1084M17	1326010 f-box domain containing expressed	1266	2	38	0.199816	3.03852	3.92663	Up	3.79e-08	1.92e-07
AK376314	Hordeum vulgare subsp. vulgare mRNA for predicted protein, complete cds, clone: NIASHv3120L13	gdsl esterase lipase at4g26790-like	1107	4	75	0.457031	6.85846	3.90752	Up	5.17e-15	4.37e-14
AK372497	Hordeum vulgare subsp. vulgare mRNA for predicted protein, complete cds, clone: NIASHv3003H24	dihydrolipoyl dehydrogenase mitochondrial-like	1506	4	74	0.335945	4.97416	3.88815	Up	8.85e-15	7.4e-14
MLOC_44106.1	Uncharacterized protein	retrotransposon unclassified	372	4	73	1.36004	19.8652	3.86852	Up	1.51e-14	1.25e-13
MLOC_43338.1	Uncharacterized protein	1023481 os03g0594700	1359	2	36	0.186142	2.68161	3.84863	Up	1.11e-07	5.39e-07
MLOC_5439.1	Uncharacterized protein	geranylgeranyl diphosphate synthase	942	4	70	0.537085	7.52246	3.80798	Up	7.55e-14	5.95e-13
AK374578	Hordeum vulgare subsp. vulgare mRNA for predicted protein, complete cds, clone: NIASHv3069J06	cytochrome p450 superfamily protein	1557	20	347	1.62471	22.5608	3.79556	Up	1.35e-63	4.13e-62
AK374425	Hordeum vulgare subsp. vulgare mRNA for predicted protein, complete cds, clone: NIASHv3064F05	two-component response regulator arr2-like	750	4	69	0.674578	9.31324	3.78722	Up	1.29e-13	1e-12
AK250028.1	-	2798554 uv damaged dna binding protein 1	1611	4	68	0.31405	4.27293	3.76616	Up	2.2e-13	1.68e-12
MLOC_11567.1	Potassium transporter	2735884 potassium transporter	2400	6	102	0.316209	4.30231	3.76616	Up	1.68e-19	1.77e-18
AK374683	Hordeum vulgare subsp. vulgare mRNA for predicted protein, complete cds, clone: NIASHv3072J11	galactomannan galactosyltransferase 1-like	1281	110	1869	10.8612	147.697	3.76539	Up	0	0
MLOC_23395.1	Uncharacterized protein	2868783 coiled-coil protein	1851	5	84	0.341663	4.59394	3.74909	Up	3.24e-16	2.94e-15
MLOC_72134.2	Uncharacterized protein	myosin-j heavy chain-like	3264	3	50	0.116253	1.55072	3.73759	Up	4.44e-10	2.67e-09
MLOC_55596.1	Uncharacterized protein	1322781 os05g0441400	795	6	99	0.954592	12.6061	3.72309	Up	8.28e-19	8.53e-18
MLOC_59075.1	Uncharacterized protein	65-kda microtubule-associated protein 3-like	2052	4	66	0.246556	3.25596	3.72309	Up	6.37e-13	4.74e-12
AK367736	Hordeum vulgare subsp. vulgare mRNA for predicted protein, complete cds, clone: NIASHv2061G15	tyrosine dopa decarboxylase 3-like	1587	5	82	0.398499	5.23058	3.71432	Up	9.38e-16	8.27e-15
MLOC_51763.4	Uncharacterized protein	protein dyad-like	2154	6	97	0.352322	4.55868	3.69365	Up	2.39e-18	2.41e-17
AK376784	Hordeum vulgare subsp. vulgare mRNA for predicted protein, complete cds, clone: NIASHv3136A14	2558903 histone h3	408	83	1334	25.7307	330.985	3.6852	Up	1.39e-234	1.34e-232
AK373554	Hordeum vulgare subsp. vulgare mRNA for predicted protein, complete cds, clone: NIASHv3034M02	probable serine protease do-like htra-like	1491	2	32	0.169663	2.17263	3.6787	Up	9.47e-07	4.13e-06
AK355960	Hordeum vulgare subsp. vulgare mRNA for predicted protein, complete cds, clone: NIASHv1028F08	2246575 zinc finger protein	900	2	32	0.281074	3.59932	3.6787	Up	9.47e-07	4.13e-06
MLOC_55015.1	Uncharacterized protein	2621733 osr40c1	1284	25	399	2.46268	31.4573	3.67509	Up	3.96e-71	1.32e-69
MLOC_65695.1	Uncharacterized protein	protein far1-related sequence 5-like	591	6	95	1.2841	16.2723	3.66359	Up	6.89e-18	6.83e-17
AK374175	Hordeum vulgare subsp. vulgare mRNA for predicted protein, complete cds, clone: NIASHv3056N10	protein nsp-interacting kinase 3-like	1866	4	63	0.271133	3.41776	3.65598	Up	3.12e-12	2.22e-11
AK248255.1	-	nas6_horvu ame: full=probable nicotianamine synthase 6 ame: full= 6 ame: full=s-adenosyl-l-methionine:s-adenosyl-l-methionine:s-adenosyl-methionine 3-amino-3-carboxypropyltransferase 6	990	4	63	0.511044	6.44196	3.65598	Up	3.12e-12	2.22e-11
MLOC_61812.1	Uncharacterized protein	probable polygalacturonase-like	1464	127	1990	10.9723	137.602	3.64857	Up	0	0
AK369118	Hordeum vulgare subsp. vulgare mRNA for predicted protein, complete cds, clone: NIASHv2085I17	720699 monocopper oxidase-like protein sku5	1791	2	31	0.141243	1.75218	3.6329	Up	1.61e-06	6.85e-06
MLOC_10500.1	Predicted protein (Uncharacterized protein)	btb poz domain-containing protein at2g46260-like	1485	14	217	1.19244	14.7927	3.6329	Up	5.53e-39	1.07e-37
MLOC_36530.1	Uncharacterized protein	cysteine proteinase inhibitor 8-like	372	206	3182	70.0419	865.905	3.62792	Up	0	0
AK374553	Hordeum vulgare subsp. vulgare mRNA for predicted protein, complete cds, clone: NIASHv3068M23	2245459 5a2 protein	321	425	6530	167.463	2059.31	3.62025	Up	0	0
AK374273	Hordeum vulgare subsp. vulgare mRNA for predicted protein, complete cds, clone: NIASHv3059C22	acetyl-coenzyme a synthetase-like	2184	4	61	0.231655	2.82742	3.60944	Up	8.98e-12	6.19e-11
MLOC_12389.2	Uncharacterized protein	2163746 nbs-lrr class disease resistance protein	2994	2	30	0.0844913	1.01434	3.58559	Up	2.74e-06	1.13e-05
MLOC_51647.1	Uncharacterized protein	hypothetical protein SORBIDRAFT_01g012976	1143	2	30	0.221318	2.65698	3.58559	Up	2.74e-06	1.13e-05
AK373740	Hordeum vulgare subsp. vulgare mRNA for predicted protein, complete cds, clone: NIASHv3042H17	2751494 os04g0683800	3048	2	30	0.0829944	0.996367	3.58559	Up	2.74e-06	1.13e-05
MLOC_11141.1	Uncharacterized protein	subtilase family protein	2472	45	669	2.30249	27.3962	3.57271	Up	1.44e-115	7.52e-114
MLOC_69251.1	Pectinesterase (EC 3.1.1.11)	pectinesterase qrt1-like	1092	6	89	0.694964	8.2505	3.56947	Up	1.62e-16	1.5e-15
MLOC_69028.2	Sulfotransferase (EC 2.8.2.-)	sulfotransferase 17-like	966	2	29	0.261871	3.03902	3.53668	Up	4.64e-06	1.87e-05
AK368373	Hordeum vulgare subsp. vulgare mRNA for predicted protein, complete cds, clone: NIASHv2072N10	predicted protein	849	28	397	4.17142	47.3365	3.50434	Up	3.94e-68	1.27e-66
MLOC_10816.2	Uncharacterized protein	12-oxophytodienoate reductase	1131	29	407	3.24317	36.4288	3.4896	Up	1.45e-69	4.73e-68
MLOC_76983.1	Uncharacterized protein	kinetochore protein	525	38	533	9.15499	102.773	3.48876	Up	1.31e-90	5.43e-89
MLOC_52357.1	Uncharacterized protein	cytokinin oxidase partial	1227	8	112	0.824668	9.24031	3.48606	Up	4.19e-20	4.55e-19
MLOC_53783.1	Trehalose 6-phosphate phosphatase (EC 3.1.3.12)	trehalose-phosphate phosphatase-like	1113	2	28	0.227284	2.54669	3.48606	Up	7.85e-06	3.08e-05
MLOC_71287.2	Alpha-1,4 glucan phosphorylase (EC 2.4.1.1)	alpha- glucan phosphorylase l chloroplastic amyloplastic-like	2571	298	4139	14.6605	162.969	3.4746	Up	0	0
MLOC_9823.2	Uncharacterized protein	rad3-like dna-binding helicase protein	2652	4	55	0.190774	2.09943	3.46006	Up	2.09e-10	1.29e-09
MLOC_77667.1	Predicted protein (Uncharacterized protein)	high mobility group b protein 7-like	645	41	560	8.04003	87.8904	3.45043	Up	3.06e-94	1.31e-92
AK365106	Hordeum vulgare subsp. vulgare mRNA for predicted protein, complete cds, clone: NIASHv2030P07	cral trio domain sec14p-like phosphatidylinositol transfer family protein	1890	5	68	0.334612	3.64217	3.44424	Up	1.47e-12	1.07e-11
MLOC_68429.1	Uncharacterized protein	cytochrome p450 77a3-like	1608	62	843	4.87685	53.0707	3.44389	Up	8.12e-141	5.03e-139
MLOC_24777.1	Uncharacterized protein	zinc finger mym-type protein 1-like	843	2	27	0.300079	3.24227	3.43359	Up	1.33e-05	5.03e-05
MLOC_63464.1	Uncharacterized protein	integral membrane hpp family protein	717	2	27	0.352813	3.81204	3.43359	Up	1.33e-05	5.03e-05
AK376689	Hordeum vulgare subsp. vulgare mRNA for predicted protein, complete cds, clone: NIASHv3131M04	2432328 gdsl esterase lipase	1080	32	423	3.74766	39.6488	3.40321	Up	9.75e-71	3.22e-69
MLOC_4896.1	Uncharacterized protein	827841 os07g0689900	4458	6	79	0.170233	1.79391	3.39752	Up	2.98e-14	2.41e-13
MLOC_761.1	Uncharacterized protein	lipid-transfer protein dir1-like	309	18	235	7.36797	76.9879	3.38529	Up	9.02e-40	1.79e-38
AK376505	Hordeum vulgare subsp. vulgare mRNA for predicted protein, partial cds, clone: NIASHv3126D05	840041 os04g0105200	378	4	52	1.33845	13.9259	3.37914	Up	9.92e-10	5.8e-09
MLOC_4908.1	Hexosyltransferase (EC 2.4.1.-)	probable galacturonosyltransferase 7-like	1941	2	26	0.130328	1.356	3.37914	Up	2.24e-05	8.23e-05
MLOC_64484.3	Uncharacterized protein	2880196 cyclin-like protein	2952	10	129	0.428467	4.42371	3.368	Up	2.43e-22	2.88e-21
MLOC_52668.5	Histone-lysine N-methyltransferase (EC 2.1.1.43)	1675689 set domain containing expressed	1269	9	116	0.897046	9.25357	3.36676	Up	3.27e-20	3.57e-19
MLOC_67418.1	Predicted protein (Uncharacterized protein)	faciata 1-like protein	2931	54	695	2.3303	24.0039	3.36468	Up	4.42e-114	2.29e-112
MLOC_75889.3	Predicted protein (Uncharacterized protein)	probable polygalacturonase-like	1134	126	1614	14.0537	144.08	3.35785	Up	3.43e-262	3.62e-260
MLOC_66225.1	Uncharacterized protein	1636115 os08g0541700	543	201	2557	46.8198	476.699	3.34789	Up	0	0
MLOC_54335.1	Uncharacterized protein	nitrate transporter -like	1797	95	1205	6.68666	67.8816	3.34366	Up	1.79e-195	1.5e-193
MLOC_63913.2	Uncharacterized protein	disease resistance zinc finger chromosome condensation-like region protein	1143	3	38	0.331978	3.36551	3.34167	Up	2.44e-07	1.14e-06
MLOC_33876.4	Uncharacterized protein	replication protein a 70 kda dna-binding subunit-like	1866	37	467	2.50798	25.3348	3.33653	Up	1.28e-76	4.62e-75
AK368788	Hordeum vulgare subsp. vulgare mRNA for predicted protein, complete cds, clone: NIASHv2079N05	cysteine proteinase	1101	18	226	2.06785	20.7794	3.32895	Up	9.19e-38	1.73e-36
MLOC_12627.1	Uncharacterized protein	1631862 os02g0243900	642	2	25	0.394029	3.94201	3.32256	Up	3.76e-05	0.000134087
MLOC_293.2	Uncharacterized protein	probable auxin efflux carrier component 1c-like isoform 2	2289	6	75	0.331542	3.31687	3.32256	Up	2.34e-13	1.79e-12
MLOC_72852.1	MATE efflux family protein	mate efflux family protein	1521	2	25	0.166316	1.66389	3.32256	Up	3.76e-05	0.000134108
MLOC_59648.1	Uncharacterized protein	1848358 partial	2025	2	25	0.124922	1.24976	3.32256	Up	3.76e-05	0.00013413
MLOC_54751.1	Uncharacterized protein	strictosidine synthase 3-like	1122	2	25	0.225461	2.25559	3.32256	Up	3.76e-05	0.000134152
MLOC_37138.2	Uncharacterized protein	cyclopropane fatty acid synthase	2391	5	62	0.264499	2.62497	3.31097	Up	3.27e-11	2.16e-10
AK374620	Hordeum vulgare subsp. vulgare mRNA for predicted protein, complete cds, clone: NIASHv3070M24	histone h2a	417	16	198	4.85308	48.0664	3.30806	Up	4.44e-33	7.39e-32
AK372405	Hordeum vulgare subsp. vulgare mRNA for predicted protein, complete cds, clone: NIASHv3001H01	2848202 alpha-amylase	1281	9	111	0.888643	8.77176	3.30319	Up	4.27e-19	4.44e-18
AK253087.1	-	probable dna primase large subunit-like	1389	6	74	0.546365	5.39315	3.30319	Up	3.91e-13	2.95e-12
MLOC_73232.1	Uncharacterized protein	protein	1695	11	134	0.820837	8.00291	3.28536	Up	1.1e-22	1.33e-21
AK251852.1	-	852947 fusion protein of histone 2a and enhanced yellow fluorescence protein	444	35	426	9.97054	97.1269	3.28413	Up	4.59e-69	1.49e-67
MLOC_66071.3	Uncharacterized protein	calmodulin-binding expressed	1764	12	145	0.860432	8.32113	3.27365	Up	2.28e-24	2.95e-23
AK368806	Hordeum vulgare subsp. vulgare mRNA for predicted protein, complete cds, clone: NIASHv2080E11	protein downstream neighbor of son homolog	1887	2	24	0.134058	1.28751	3.26366	Up	6.31e-05	0.000217081
AK367545	Hordeum vulgare subsp. vulgare mRNA for predicted protein, partial cds, clone: NIASHv2058L09	wound-induced protein wi12 containing protein	303	4	48	1.66975	16.0366	3.26366	Up	7.79e-09	4.22e-08
MLOC_33441.1	Uncharacterized protein	2890359 os02g0170900	615	2	24	0.411328	3.95047	3.26366	Up	6.31e-05	0.000217047
AK248534.1	-	852947 fusion protein of histone 2a and enhanced yellow fluorescence protein	444	37	443	10.5403	101.003	3.26041	Up	2.67e-71	8.92e-70
AK369538	Hordeum vulgare subsp. vulgare mRNA for predicted protein, complete cds, clone: NIASHv2093B02	histone h2a	465	181	2152	49.2333	468.492	3.25032	Up	0	0
MLOC_36749.1	Uncharacterized protein	wd repeat and hmg-box dna-binding protein 1-like	3030	44	522	1.83672	17.4398	3.24717	Up	1.97e-83	7.59e-82
MLOC_11224.3	Uncharacterized protein	gdsl esterase lipase at1g71691-like	1104	14	166	1.60396	15.2213	3.24638	Up	1.65e-27	2.34e-26
MLOC_4084.1	Uncharacterized protein	subtilisin-like protease-like	2313	26	307	1.42178	13.4362	3.24036	Up	1.33e-49	3.16e-48
MLOC_58264.2	Uncharacterized protein	transmembrane bax inhibitor motif-containing protein 4	717	3	35	0.52922	4.94153	3.22302	Up	1.14e-06	4.94e-06
MLOC_64906.1	Histone H2A	2546731 histone z	417	50	580	15.1659	140.801	3.21475	Up	1.09e-91	4.57e-90
MLOC_57148.1	Predicted protein (Uncharacterized protein)	selt selw selh selenoprotein domain containing protein	576	13	150	2.85466	26.3622	3.20708	Up	1e-24	1.31e-23
MLOC_17320.1	Uncharacterized protein	cell division control protein 45 homolog	1248	2	23	0.202698	1.86563	3.20226	Up	0.000105552	0.000350973
MLOC_70149.2	Uncharacterized protein	2490406 os03g0439500	1047	2	23	0.241611	2.22379	3.20226	Up	0.000105552	0.00035108
AK364995	Hordeum vulgare subsp. vulgare mRNA for predicted protein, complete cds, clone: NIASHv2030C04	transcription factor bhlh123-like	999	2	23	0.25322	2.33064	3.20226	Up	0.000105552	0.000351027
AK375145	Hordeum vulgare subsp. vulgare mRNA for predicted protein, complete cds, clone: NIASHv3086G24	udp-glucose 6-dehydrogenase-like	1440	12	138	1.05403	9.70129	3.20226	Up	7.99e-23	9.72e-22
MLOC_62978.1	Uncharacterized protein	cation h(+) antiporter 19-like	2442	2	23	0.10359	0.953444	3.20226	Up	0.000105552	0.00035092
MLOC_51984.1	Uncharacterized protein	medium-chain-fatty-acid-- ligase-like	1977	23	262	1.47148	13.4155	3.18856	Up	6.07e-42	1.26e-40
MLOC_5608.1	Predicted protein (Uncharacterized protein)	leucine-rich repeat family protein	1272	20	226	1.98873	17.986	3.17695	Up	2.94e-36	5.31e-35
AK356729	Hordeum vulgare subsp. vulgare mRNA for predicted protein, complete cds, clone: NIASHv1039B20	glucan endo- -beta-glucosidase 3 precursor	507	33	371	8.23265	74.0762	3.16958	Up	1.84e-58	5.18e-57
AK371893	Hordeum vulgare subsp. vulgare mRNA for predicted protein, complete cds, clone: NIASHv2142N21	resistance-related receptor-like kinase	1890	17	190	1.13768	10.1766	3.16109	Up	1.44e-30	2.24e-29
MLOC_58410.4	Uncharacterized protein	protein breast cancer susceptibility 1 homolog	1863	10	111	0.678924	6.03147	3.15119	Up	2.34e-18	2.37e-17
MLOC_51302.1	Uncharacterized protein	2607290 protein	972	2	22	0.260254	2.29123	3.13813	Up	0.000176138	0.000566694
MLOC_75759.1	Uncharacterized protein	1262834 cytochrome c biogenesis b	648	2	22	0.390381	3.43685	3.13813	Up	0.000176138	0.000566611
MLOC_36829.1	Uncharacterized protein	50605 membrane	1299	2	22	0.19474	1.71446	3.13813	Up	0.000176138	0.000566861
MLOC_21867.4	Uncharacterized protein	protein tas-like	651	3	33	0.582873	5.13152	3.13813	Up	3.16e-06	1.3e-05
MLOC_18400.3	Uncharacterized protein	nbs-lrr disease resistance protein homologue	1161	2	22	0.217887	1.91824	3.13813	Up	0.000176138	0.000566778
MLOC_36472.3	Laccase (EC 1.10.3.2) (Benzenediol:oxygen oxidoreductase) (Diphenol oxidase) (Urishiol oxidase)	laccase family protein	1902	2	22	0.133	1.17091	3.13813	Up	0.000176138	0.000566527
AK365895	Hordeum vulgare subsp. vulgare mRNA for predicted protein, partial cds, clone: NIASHv2038K15	protein kinase domain containing protein	1560	15	163	1.21619	10.5773	3.12054	Up	4.05e-26	5.51e-25
AK360173	Hordeum vulgare subsp. vulgare mRNA for predicted protein, complete cds, clone: NIASHv1112C08	aspartic proteinase nepenthesin-2-like	1419	87	945	7.7548	67.4159	3.11993	Up	2.75e-144	1.75e-142
MLOC_10176.1	Uncharacterized protein	2569710 protein zx	1200	12639	137150	1332.19	11569.8	3.1185	Up	0	0
MLOC_12747.2	Uncharacterized protein	ethylene-responsive transcription factor win1-like	618	6	65	1.22799	10.6473	3.11611	Up	3.79e-11	2.48e-10
MLOC_58020.1	Uncharacterized protein	27k protein	630	22	237	4.41688	38.0821	3.10801	Up	3.27e-37	6.05e-36
MLOC_53891.1	Uncharacterized protein	kinesin heavy chain isoform	753	8	86	1.34378	11.5616	3.10497	Up	2.54e-14	2.06e-13
MLOC_78778.1	Uncharacterized protein	udp-glycosyltransferase 76f1-like	942	18	192	2.41688	20.633	3.09374	Up	2.75e-30	4.28e-29
AK374758	Hordeum vulgare subsp. vulgare mRNA for predicted protein, partial cds, clone: NIASHv3075I13	2251736 harpin-induced protein	387	6	64	1.96098	16.741	3.09374	Up	6.27e-11	4.04e-10
MLOC_38213.1	Uncharacterized protein	725786 os12g0577200	456	3	32	0.832128	7.10392	3.09374	Up	5.25e-06	2.1e-05
AK369331	Hordeum vulgare subsp. vulgare mRNA for predicted protein, complete cds, clone: NIASHv2089D09	2607231 protein	432	3	32	0.878357	7.49858	3.09374	Up	5.25e-06	2.1e-05
MLOC_7202.1	Uncharacterized protein (Fragment)	pyruvate decarboxylase isozyme 2-like	1572	651	6930	52.3796	446.266	3.09083	Up	0	0
AK249420.1	-	2597604 histone h4	309	16	170	6.54931	55.6934	3.08809	Up	6.27e-27	8.76e-26
MLOC_77655.1	Uncharacterized protein (Fragment)	hypothetical protein SORBIDRAFT_05g008100	294	5	53	2.15108	18.2491	3.08469	Up	3.18e-09	1.78e-08
MLOC_68873.2	Predicted protein (Uncharacterized protein)	threonine endopeptidase	513	7	74	1.7259	14.6025	3.0808	Up	2.07e-12	1.49e-11
MLOC_78929.1	Uncharacterized protein	1013268 expressed	750	2	21	0.337289	2.83446	3.07102	Up	0.00029305	0.000906251
MLOC_31846.1	Uncharacterized protein	duf26 domain receptor-like protein kinase	1041	2	21	0.243004	2.04212	3.07102	Up	0.00029305	0.00090638
MLOC_79446.2	Uncharacterized protein	pathogen-related protein	780	4	42	0.648633	5.45089	3.07102	Up	1.64e-07	7.77e-07
AK250005.1	-	2576767 rnase s-like protein	738	7	73	1.19971	10.0134	3.06117	Up	3.42e-12	2.43e-11
MLOC_55372.2	Predicted protein (Uncharacterized protein)	adenine phosphoribosyltransferase 2	672	19	198	3.57617	29.8269	3.06013	Up	7e-31	1.1e-29
AK354862	Hordeum vulgare subsp. vulgare mRNA for predicted protein, complete cds, clone: NIASHv1012G13	cold shock protein-1 precursor	483	5	52	1.30935	10.8986	3.05721	Up	5.24e-09	2.89e-08
MLOC_16173.1	Uncharacterized protein	pre-mrna-splicing factor atp-dependent rna helicase prp16-like	3390	14	145	0.522351	4.32993	3.05125	Up	6.42e-23	7.85e-22
MLOC_4198.1	Uncharacterized protein	proline-rich receptor-like protein kinase perk4-like	1698	3	31	0.223469	1.84815	3.04793	Up	8.7e-06	3.38e-05
MLOC_25315.1	Uncharacterized protein		435	7	72	2.03537	16.7555	3.04127	Up	5.64e-12	3.95e-11
MLOC_61918.1	Pectinesterase (EC 3.1.1.11)	2770932 pectinesterase	1761	4	41	0.287299	2.35688	3.03625	Up	2.71e-07	1.25e-06
MLOC_68703.2	Uncharacterized protein	hypothetical protein ZEAMMB73_245490	396	24	246	7.66566	62.8858	3.03625	Up	9.47e-38	1.78e-36
MLOC_57973.1	Uncharacterized protein	422975 os10g0446100	1176	5	51	0.53777	4.39011	3.0292	Up	8.65e-09	4.67e-08
MLOC_73259.1	Predicted protein (Uncharacterized protein)	2613563 protein	1593	5	51	0.396998	3.24091	3.0292	Up	8.65e-09	4.66e-08
MLOC_4724.2	Uncharacterized protein	zinc-finger domain of monoamine-oxidase a repressor r1 protein	1572	6	61	0.482761	3.92817	3.02448	Up	2.81e-10	1.72e-09
AK377086	Hordeum vulgare subsp. vulgare mRNA for predicted protein, complete cds, clone: NIASHv3147P10	2597604 histone h4	309	130	1316	53.2131	431.132	3.01828	Up	5.47e-194	4.58e-192
MLOC_13217.3	Uncharacterized protein	abc transporter c family member 13-like	2106	48	482	2.88281	23.1687	3.00663	Up	7.6e-72	2.57e-70
AK374452	Hordeum vulgare subsp. vulgare mRNA for predicted protein, complete cds, clone: NIASHv3064O23	2245459 5a2 protein	321	44	441	17.3373	139.074	3.0039	Up	8.22e-66	2.57e-64
AK372739	Hordeum vulgare subsp. vulgare mRNA for predicted protein, complete cds, clone: NIASHv3010O09	2829918 os02g0711400	420	4	40	1.2046	9.64103	3.00063	Up	4.46e-07	2.02e-06
MLOC_4500.2	Uncharacterized protein	nbs-lrr disease resistance protein homologue	3303	5	50	0.191468	1.53241	3.00063	Up	1.42e-08	7.54e-08
MLOC_3686.1	Predicted protein (Uncharacterized protein)	cle family 402 protein	315	8	80	3.21228	25.7094	3.00063	Up	5.07e-13	3.79e-12
MLOC_52923.1	Predicted protein (Uncharacterized protein)	2244702 gir1	333	3	30	1.13949	9.1199	3.00063	Up	1.44e-05	5.43e-05
AK252060.1	-	852947 fusion protein of histone 2a and enhanced yellow fluorescence protein	561	71	708	16.0077	127.757	2.99656	Up	1.97e-104	9.54e-103
MLOC_50915.2	Uncharacterized protein	tpa: b3 dna binding domain family protein	1386	51	505	4.65415	36.8843	2.98641	Up	1.04e-74	3.61e-73
MLOC_10385.1	Uncharacterized protein	predicted protein	438	15	148	4.33163	34.2059	2.98126	Up	7.06e-23	8.6e-22
AK251792.1	-	histone -like isoform 1	408	185	1824	57.3516	452.561	2.98021	Up	7.59e-265	8.09e-263
AK359093	Hordeum vulgare subsp. vulgare mRNA for predicted protein, complete cds, clone: NIASHv1089E14	far-red impaired response	1350	11	108	1.03061	8.09847	2.97416	Up	5.2e-17	4.92e-16
AK360378	Hordeum vulgare subsp. vulgare mRNA for predicted protein, complete cds, clone: NIASHv1116O14	r2r3-myb protein	993	5	49	0.636875	4.99528	2.97148	Up	2.34e-08	1.21e-07
MLOC_62243.3	Uncharacterized protein	dna replication atp-dependent helicase dna2	3690	15	146	0.51416	4.00534	2.96163	Up	1.89e-22	2.26e-21
MLOC_4717.1	Uncharacterized protein	denticleless protein homolog a-like	660	3	29	0.574925	4.44802	2.95172	Up	2.37e-05	8.69e-05
MLOC_57391.1	Uncharacterized protein	class iii chitinase	897	14	135	1.9741	15.2354	2.94816	Up	9.02e-21	1e-19
AK248176.1	-	ribonucleotide reductase	2460	87	836	4.4732	34.402	2.94312	Up	7.43e-121	3.96e-119
MLOC_53422.1	Uncharacterized protein	2246677 nonspecific lipid-transfer protein precursor	300	1173	11174	494.55	3770.51	2.93057	Up	0	0
AK249961.1	-	hmg1 2-like	378	23	219	7.69608	58.6496	2.92993	Up	1.19e-32	1.96e-31
MLOC_76269.1	Predicted protein (Uncharacterized protein)	2258769 peptide-n4-asparagine amidase a	1632	69	657	5.34765	40.7529	2.92993	Up	6.44e-95	2.78e-93
MLOC_78617.2	Uncharacterized protein	2491180 os05g0320100	1182	26	247	2.78221	21.154	2.92663	Up	1.33e-36	2.42e-35
AK360656	Hordeum vulgare subsp. vulgare mRNA for predicted protein, complete cds, clone: NIASHv1122L11	transcription factor spatula-like	888	4	38	0.569745	4.33195	2.92663	Up	1.2e-06	5.2e-06
MLOC_59358.4	-	sucrose synthase	2448	807	7544	41.6961	311.963	2.90339	Up	0	0
AK375892	Hordeum vulgare subsp. vulgare mRNA for predicted protein, complete cds, clone: NIASHv3108P13	probable metal-nicotianamine transporter ysl9-like	1440	3	28	0.263507	1.96838	2.90109	Up	3.89e-05	0.000138409
MLOC_69002.1	Predicted protein (Uncharacterized protein)	ethylene-responsive transcription factor rap2-11-like	903	6	56	0.840422	6.27788	2.90109	Up	3.34e-09	1.87e-08
AK376085	Hordeum vulgare subsp. vulgare mRNA for predicted protein, complete cds, clone: NIASHv3114F16	1-aminocyclopropane-1-carboxylate oxidase homolog 1-like	1008	21	195	2.63507	19.5834	2.89371	Up	6.95e-29	1.03e-27
AK252941.1	-	snf1-related protein kinase	1176	32	296	3.44173	25.4799	2.88815	Up	5.12e-43	1.09e-41
MLOC_9079.1	Uncharacterized protein (Fragment)	leaf rust resistance protein lr10	1047	4	37	0.483222	3.5774	2.88815	Up	1.97e-06	8.32e-06
MLOC_48344.2	Uncharacterized protein	2620544 protein	600	5	46	1.05403	7.76103	2.88033	Up	1.03e-07	4.99e-07
MLOC_14996.3	Uncharacterized protein	1634197 os04g0590366	747	28	257	4.74101	34.8278	2.87697	Up	2.11e-37	3.92e-36
AK355139	Hordeum vulgare subsp. vulgare mRNA for predicted protein, complete cds, clone: NIASHv1016I04	eukaryotic adp atp carrier	960	7	64	0.922275	6.74872	2.87135	Up	2.93e-10	1.79e-09
AK359393	Hordeum vulgare subsp. vulgare mRNA for predicted protein, complete cds, clone: NIASHv1095N16	fad-binding berberine family protein	1626	163	1483	12.6795	92.328	2.86428	Up	2.78e-207	2.43e-205
MLOC_32747.1	Uncharacterized protein	transposon mutator sub-class	2499	4	36	0.202455	1.45831	2.84863	Up	3.23e-06	1.33e-05
MLOC_10012.1	Uncharacterized protein	sister chromatid cohesion 1 protein 2-like	1947	8	72	0.519706	3.74351	2.84863	Up	2.58e-11	1.72e-10
MLOC_43850.1	Uncharacterized protein (Fragment)	hypothetical protein	720	3	27	0.527014	3.79616	2.84863	Up	6.38e-05	0.000219291
AK355314	Hordeum vulgare subsp. vulgare mRNA for predicted protein, complete cds, clone: NIASHv1018O16	cinnamyl alcohol dehydrogenase 7-like	1110	5	45	0.569745	4.10395	2.84863	Up	1.68e-07	7.96e-07
MLOC_21717.1	Uncharacterized protein	basic blue protein	399	4	36	1.268	9.13361	2.84863	Up	3.23e-06	1.33e-05
MLOC_58115.2	Uncharacterized protein	ubiquitin carboxyl-terminal hydrolase 16-like	2835	55	494	2.45382	17.6395	2.84571	Up	1.01e-69	3.29e-68
MLOC_36410.1	Uncharacterized protein	hypothetical protein	2430	15	134	0.780762	5.58228	2.8379	Up	6.62e-20	7.12e-19
MLOC_55385.2	Uncharacterized protein	ring fyve phd zinc finger-containing protein	2364	13	116	0.695552	4.96733	2.83624	Up	2.13e-17	2.05e-16
MLOC_4129.1	Uncharacterized protein	b3 domain-containing protein os08g0325100-like	1581	9	80	0.72002	5.12237	2.8307	Up	2.29e-12	1.65e-11
AK360570	Hordeum vulgare subsp. vulgare mRNA for predicted protein, complete cds, clone: NIASHv1121A18	protein	1893	6	53	0.400898	2.83425	2.82166	Up	1.45e-08	7.66e-08
MLOC_59510.1	Uncharacterized protein	cell division control protein 45 homolog	1128	6	53	0.672784	4.75641	2.82166	Up	1.45e-08	7.66e-08
MLOC_476.1	Uncharacterized protein	1262823 nadh dehydrogenase subunit 2	282	4	35	1.79409	12.5641	2.80798	Up	5.26e-06	2.1e-05
MLOC_55525.1	Uncharacterized protein	sugar carrier protein c-like	1581	31	271	2.48007	17.352	2.80665	Up	2.07e-38	3.95e-37
AK374993	Hordeum vulgare subsp. vulgare mRNA for predicted protein, complete cds, clone: NIASHv3082H02	histone -like isoform 1	417	26	227	7.88626	55.1065	2.80481	Up	2.17e-32	3.56e-31
AK249748.1	-	acylamino-acid-releasing enzyme-like	2301	43	373	2.36366	16.4099	2.79547	Up	4.32e-52	1.08e-50
AK370749	Hordeum vulgare subsp. vulgare mRNA for predicted protein, complete cds, clone: NIASHv2116D20	protein kinase xa21	2811	6	52	0.269975	1.87264	2.79418	Up	2.35e-08	1.22e-07
AK375094	Hordeum vulgare subsp. vulgare mRNA for predicted protein, complete cds, clone: NIASHv3085E10	hydroxysteroid dehydrogenase-like protein 1-like	1017	3	26	0.373108	2.58801	2.79418	Up	0.000104193	0.000346716
MLOC_57259.1	Predicted protein (Uncharacterized protein)	pumilio homolog chloroplastic-like	1452	17	147	1.48087	10.2486	2.79091	Up	2.32e-21	2.65e-20
MLOC_24802.1	Maturase K	2716644 maturase	942	72	619	9.66753	66.5201	2.78257	Up	5.45e-85	2.15e-83
MLOC_36700.1	Uncharacterized protein	gibberellin induced protein	393	24	206	7.72418	53.0625	2.78024	Up	2.86e-29	4.27e-28
AK374103	Hordeum vulgare subsp. vulgare mRNA for predicted protein, complete cds, clone: NIASHv3054D08	receptor kinase 5	2523	10	85	0.501322	3.41047	2.76616	Up	8.67e-13	6.4e-12
MLOC_11952.1	Cytosine-specific methyltransferase (EC 2.1.1.37)	dna (cytosine-5)-methyltransferase 3-like	2199	67	567	3.85375	26.1018	2.75982	Up	2.48e-77	9.05e-76
MLOC_1587.2	Alpha-galactosidase (EC 3.2.1.22) (Melibiase)	799185 alpha-galactosidase expressed	1209	241	2018	25.213	168.969	2.74452	Up	3.45e-269	3.81e-267
AK374121	Hordeum vulgare subsp. vulgare mRNA for predicted protein, complete cds, clone: NIASHv3055A20	852947 fusion protein of histone 2a and enhanced yellow fluorescence protein	441	54	451	15.4878	103.526	2.7408	Up	2.11e-61	6.2e-60
MLOC_80962.2	Uncharacterized protein	ring-h2 finger protein atl11-like	765	12	100	1.98405	13.2328	2.73759	Up	1.11e-14	9.26e-14
AK375501	Hordeum vulgare subsp. vulgare mRNA for predicted protein, complete cds, clone: NIASHv3096C06	predicted protein	921	3	25	0.411998	2.74785	2.73759	Up	0.000169689	0.00054772
AK356366	Hordeum vulgare subsp. vulgare mRNA for predicted protein, partial cds, clone: NIASHv1033L17	cyclin-p3-1-like isoform 1	708	6	50	1.07189	7.14907	2.73759	Up	6.18e-08	3.06e-07
AK357081	Hordeum vulgare subsp. vulgare mRNA for predicted protein, complete cds, clone: NIASHv1045K11	735712 at5g63860 mgi19_6	1326	52	433	4.96014	33.0565	2.73648	Up	6.42e-59	1.81e-57
AK355109	Hordeum vulgare subsp. vulgare mRNA for predicted protein, complete cds, clone: NIASHv1015P22	1089292 chloroplast rna binding protein precursor	855	4	33	0.591735	3.90716	2.72309	Up	1.39e-05	5.26e-05
MLOC_70302.1	Uncharacterized protein	bzip dna-binding protein	504	23	189	5.77206	37.9616	2.71738	Up	2.3e-26	3.15e-25
MLOC_45211.1	Uncharacterized protein	zinc finger mym-type protein 1-like	285	5	41	2.21901	14.563	2.71432	Up	1.17e-06	5.04e-06
MLOC_12995.1	Uncharacterized protein	2610323 protein	1116	50	407	5.66682	36.9184	2.70373	Up	8.66e-55	2.28e-53
MLOC_9778.1	Uncharacterized protein	uncharacterized mfs-type transporter c19orf28-like	1383	11	89	1.00601	6.51449	2.695	Up	5.21e-13	3.9e-12
AK359280	Hordeum vulgare subsp. vulgare mRNA for predicted protein, complete cds, clone: NIASHv1093C19	peroxidase 3-like	993	11	89	1.40113	9.07306	2.695	Up	5.21e-13	3.9e-12
AK362764	Hordeum vulgare subsp. vulgare mRNA for predicted protein, complete cds, clone: NIASHv2009P06	protease inhibitor seed storage lipid transfer protein family protein	342	3	24	1.1095	7.10392	2.6787	Up	0.000275408	0.000855936
MLOC_65443.1	Uncharacterized protein	low quality protein: fbd-associated f-box protein at3g50710-like	1596	3	24	0.237751	1.52227	2.6787	Up	0.000275408	0.000855815
AK248308.1	-	ternary complex factor mip1	1923	4	32	0.263096	1.68455	2.6787	Up	2.25e-05	8.27e-05
MLOC_36571.1	Uncharacterized protein	916989 os04g0645200	270	4	32	1.87383	11.9977	2.6787	Up	2.25e-05	8.28e-05
MLOC_63408.1	Cytosolic Fe-S cluster assembly factor NBP35	cytosolic fe-s cluster assembly factor nubp1-like	1044	6	48	0.726916	4.65429	2.6787	Up	1.61e-07	7.64e-07
MLOC_6647.2	Uncharacterized protein	726794 g1-like7 protein	636	3	24	0.59662	3.82003	2.6787	Up	0.000275408	0.000856058
AK359477	Hordeum vulgare subsp. vulgare mRNA for predicted protein, complete cds, clone: NIASHv1097M03	929642 at2g30700	648	3	24	0.585572	3.74929	2.6787	Up	0.000275408	0.000855693
MLOC_75895.1	Uncharacterized protein	1906924 receptor protein kinase-like protein	801	4	32	0.631628	4.04418	2.6787	Up	2.25e-05	8.27e-05
AK376525	Hordeum vulgare subsp. vulgare mRNA for predicted protein, complete cds, clone: NIASHv3126L22	two-component response regulator arr2-like	1437	4	32	0.352076	2.25427	2.6787	Up	2.25e-05	8.27e-05
MLOC_11531.1	Uncharacterized protein	serine carboxypeptidase-like 33-like	1458	6	48	0.520508	3.3327	2.6787	Up	1.61e-07	7.64e-07
AK363636	Hordeum vulgare subsp. vulgare mRNA for predicted protein, complete cds, clone: NIASHv2017I24	histone -like isoform 1	411	71	567	21.8499	139.654	2.67616	Up	6.93e-75	2.42e-73
AK375311	Hordeum vulgare subsp. vulgare mRNA for predicted protein, complete cds, clone: NIASHv3090L01	burp domain-containing protein 3-like	1608	280	2223	22.0245	139.948	2.66771	Up	1.71e-287	2.03e-285
AK354984	Hordeum vulgare subsp. vulgare mRNA for predicted protein, complete cds, clone: NIASHv1014F05	nad-dependent epimerase dehydratase family protein	1470	16	127	1.37669	8.7458	2.66739	Up	7.8e-18	7.71e-17
MLOC_65864.1	Predicted protein (Uncharacterized protein)	uncharacterized oxidoreductase -like	870	11	87	1.59922	10.1231	2.66221	Up	1.35e-12	9.81e-12
MLOC_73536.2	Uncharacterized protein	1000299 ribosomal rna apurinic site specific lyase	1314	17	134	1.63639	10.3234	2.65733	Up	1.13e-18	1.15e-17
MLOC_74118.1	Uncharacterized protein	deoxyuridine 5 -triphosphate nucleotidohydrolase-like	489	8	63	2.06926	13.042	2.65598	Up	1.95e-09	1.12e-08
AK248730.1	-	2597604 histone h4	309	16	126	6.54931	41.2786	2.65598	Up	1.25e-17	1.22e-16
MLOC_67381.1	Uncharacterized protein	phosphoenolpyruvate carboxylase	2733	148	1165	6.84945	43.1518	2.65536	Up	8.49e-151	5.62e-149
MLOC_75643.1	Uncharacterized protein	leucine-rich repeat receptor protein kinase exs-like	3930	20	157	0.643682	4.04408	2.65139	Up	1.34e-21	1.55e-20
MLOC_52543.1	Uncharacterized protein	1302719 os05g0551500	231	10	78	5.47547	34.1818	2.64217	Up	2.43e-11	1.62e-10
MLOC_25077.2	Uncharacterized protein (Fragment)	transposon en spm sub- expressed	708	5	39	0.893245	5.57628	2.64217	Up	3.04e-06	1.25e-05
AK364194	Hordeum vulgare subsp. vulgare mRNA for predicted protein, complete cds, clone: NIASHv2022J06	cytochrome p450 superfamily protein	1659	40	312	3.04963	19.038	2.64217	Up	2.33e-41	4.77e-40
MLOC_18047.2	Uncharacterized protein	rna-binding ras-gap sh3 binding protein	759	19	148	3.16625	19.7394	2.64023	Up	2.37e-20	2.59e-19
MLOC_57909.2	Uncharacterized protein	protein kinase	2334	38	296	2.05929	12.8382	2.64023	Up	2.77e-39	5.4e-38
AK253094.1	-	2260 adp-glucose pyrophosphorylase small subunit	1542	2869	22219	235.331	1458.66	2.63187	Up	0	0
AK248244.1	-	1712400 qltg3-1	438	23	178	6.64183	41.1395	2.63087	Up	4.12e-24	5.28e-23
AK375922	Hordeum vulgare subsp. vulgare mRNA for predicted protein, partial cds, clone: NIASHv3109O13	cysteine-rich peptide	333	7	54	2.65881	16.4158	2.62623	Up	3.59e-08	1.83e-07
MLOC_7435.1	Uncharacterized protein	c2 domain-containing protein	2214	14	108	0.799805	4.93809	2.62623	Up	3.95e-15	3.36e-14
MLOC_22265.1	Uncharacterized protein	59283 transcription factor x1	1077	6	46	0.704643	4.32369	2.6173	Up	4.16e-07	1.89e-06
MLOC_60115.1	Predicted protein (Uncharacterized protein)	protein	1032	9	69	1.10305	6.76834	2.6173	Up	4.4e-10	2.65e-09
AK359991	Hordeum vulgare subsp. vulgare mRNA for predicted protein, complete cds, clone: NIASHv1108A05	2597604 histone h4	309	42	322	17.1919	105.49	2.6173	Up	3.26e-42	6.79e-41
AK366006	Hordeum vulgare subsp. vulgare mRNA for predicted protein, partial cds, clone: NIASHv2039L12	chaperone protein chloroplastic-like	2910	38	289	1.65167	10.0535	2.6057	Up	7.27e-38	1.37e-36
MLOC_75032.1	Uncharacterized protein	leucoanthocyanidin dioxygenase	1065	12	91	1.42517	8.64977	2.60153	Up	7.87e-13	5.83e-12
AK356027	Hordeum vulgare subsp. vulgare mRNA for predicted protein, complete cds, clone: NIASHv1028P22	nodulin-26 like intrinsic protein	834	7	53	1.06161	6.43314	2.59927	Up	5.75e-08	2.86e-07
MLOC_62512.1	Peroxidase (EC 1.11.1.7)	peroxidase	990	100	756	12.7761	77.3036	2.59709	Up	3.83e-96	1.69e-94
AK374727	Hordeum vulgare subsp. vulgare mRNA for predicted protein, complete cds, clone: NIASHv3074N01	2693640 cytoplasmic protein of eukaryotic origin ( kd)-like	918	9	68	1.24003	7.49858	2.59624	Up	7.04e-10	4.17e-09
AK371644	Hordeum vulgare subsp. vulgare mRNA for predicted protein, complete cds, clone: NIASHv2139C06	2612187 protein	1419	9	68	0.802221	4.85109	2.59624	Up	7.04e-10	4.17e-09
MLOC_10982.1	Uncharacterized protein	f-box lrr-repeat protein at5g02700-like	1602	31	234	2.44756	14.7865	2.59487	Up	8.34e-31	1.31e-29
AK362441	Hordeum vulgare subsp. vulgare mRNA for predicted protein, complete cds, clone: NIASHv2005F09	2597604 histone h4	309	64	482	26.1972	157.907	2.59159	Up	9.34e-62	2.76e-60
AK363613	-	isoleucyl-trna cytoplasmic-like	2136	4	30	0.23686	1.42178	2.58559	Up	5.83e-05	0.000202133
MLOC_18410.1	Uncharacterized protein	long cell-linked locus protein	537	4	30	0.942149	5.65536	2.58559	Up	5.83e-05	0.000202101
MLOC_10855.1	Predicted protein (Uncharacterized protein)	856820 aquaporin	870	581	4303	84.4677	500.685	2.56743	Up	0	0
MLOC_10314.1	Uncharacterized protein	dna replication licensing factor mcm5-a-like	1515	54	399	4.50832	26.6608	2.56406	Up	8.27e-51	2.02e-49
MLOC_37653.2	Uncharacterized protein	udp-glycosyltransferase 74f1-like	1104	16	118	1.83309	10.82	2.56134	Up	5.26e-16	4.72e-15
MLOC_7404.2	Uncharacterized protein	probable serine threonine-protein kinase at1g01540-like	1554	20	146	1.62784	9.51075	2.5466	Up	2.26e-19	2.38e-18
MLOC_12203.1	Uncharacterized protein	2771790 os07g0499900	1464	30	219	2.59187	15.1431	2.5466	Up	2.33e-28	3.42e-27
MLOC_80595.2	Uncharacterized protein	1903088 nucleic acid binding protein	957	22	160	2.90767	16.9247	2.5412	Up	4.73e-21	5.34e-20
AK359748	Hordeum vulgare subsp. vulgare mRNA for predicted protein, complete cds, clone: NIASHv1102E23	752225 isp4-like protein	2247	4	29	0.22516	1.3065	2.53668	Up	9.35e-05	0.000313502
MLOC_68183.1	Uncharacterized protein	auxin-induced protein 5ng4-like	1143	28	203	3.09846	17.9789	2.53668	Up	2.77e-26	3.8e-25
MLOC_71597.1	Predicted protein (Uncharacterized protein)	2621335 protein	1590	311	2252	24.7398	143.379	2.53492	Up	2.5e-275	2.84e-273
MLOC_15376.1	Uncharacterized protein	1010104 aspartic proteinase nepenthesin ii	1305	15	108	1.45383	8.37773	2.5267	Up	1.47e-14	1.22e-13
MLOC_21715.1	Uncharacterized protein	14646 transposon ping pong snoopy sub-class	600	5	36	1.05403	6.07385	2.5267	Up	1.25e-05	4.76e-05
MLOC_7482.1	Predicted protein (Uncharacterized protein)	probable peptide nitrate transporter at5g62680-like	1809	117	841	8.18052	47.062	2.5243	Up	1.77e-103	8.43e-102
MLOC_81678.2	Pectinesterase (EC 3.1.1.11)	probable pectinesterase 15-like	1224	6	43	0.620017	3.55631	2.52	Up	1.7e-06	7.2e-06
AK373951	Hordeum vulgare subsp. vulgare mRNA for predicted protein, complete cds, clone: NIASHv3048P20	1851719 os11g0458100	1758	44	314	3.16568	18.0811	2.51389	Up	1.82e-39	3.58e-38
AK251633.1	-	852947 fusion protein of histone 2a and enhanced yellow fluorescence protein	441	175	1248	50.1918	286.476	2.51289	Up	6.28e-152	4.18e-150
MLOC_68174.2	Uncharacterized protein	f-box protein at4g35930-like	882	9	64	1.29065	7.34555	2.50878	Up	4.54e-09	2.51e-08
AK358656	Hordeum vulgare subsp. vulgare mRNA for predicted protein, complete cds, clone: NIASHv1081C04	f-box kelch-repeat protein skip25-like	1239	21	149	2.14379	12.1738	2.50555	Up	2.06e-19	2.17e-18
MLOC_72641.1	Uncharacterized protein	histone-like transcription factor and archaeal histone family protein	1113	14	99	1.59099	9.00436	2.5007	Up	2.58e-13	1.97e-12
AK357487	Hordeum vulgare subsp. vulgare mRNA for predicted protein, complete cds, clone: NIASHv1054I15	1389886 ettin protein	2091	31	219	1.87517	10.6024	2.49929	Up	8.45e-28	1.21e-26
AK355159	Hordeum vulgare subsp. vulgare mRNA for predicted protein, complete cds, clone: NIASHv1016M04	peroxidase 21	1011	16	113	2.00172	11.3146	2.49888	Up	5.29e-15	4.47e-14
MLOC_53948.1	Predicted protein (Uncharacterized protein)	rare lipoprotein a like double-psi beta-barrel containing expressed	1245	25	176	2.53983	14.3105	2.49428	Up	1.43e-22	1.72e-21
MLOC_65676.1	Uncharacterized protein	subtilisin-like protease	1950	5	35	0.324317	1.81696	2.48606	Up	1.99e-05	7.38e-05
AK360828	Hordeum vulgare subsp. vulgare mRNA for predicted protein, complete cds, clone: NIASHv1126B11	purple acid phosphatase 22-like	1596	8	56	0.634002	3.55196	2.48606	Up	5.15e-08	2.58e-07
MLOC_77488.1	Homeodomain leucine zipper protein class 1 (Predicted protein) (Uncharacterized protein)	2312016 homeodomain leucine zipper protein	708	9	63	1.60784	9.00783	2.48606	Up	7.19e-09	3.92e-08
MLOC_31360.1	Uncharacterized protein	o-methyltransferase zrp4	1083	56	390	6.54023	36.4543	2.47868	Up	6.73e-48	1.57e-46
MLOC_79196.1	Uncharacterized protein	2246677 nonspecific lipid-transfer protein precursor	285	63	438	27.9595	155.576	2.47621	Up	1.54e-53	3.94e-52
AK375075	Hordeum vulgare subsp. vulgare mRNA for predicted protein, complete cds, clone: NIASHv3084O17	protein breast cancer susceptibility 1 homolog	2955	29	201	1.24129	6.88575	2.47177	Up	2.48e-25	3.3e-24
MLOC_5431.2	Carboxypeptidase (EC 3.4.16.-)	serine carboxypeptidase 24-like	1557	30	207	2.43706	13.4584	2.4653	Up	5.68e-26	7.69e-25
MLOC_46970.2	Uncharacterized protein	predicted protein	2163	29	200	1.6958	9.36023	2.46458	Up	3.91e-25	5.18e-24
MLOC_73036.2	Uncharacterized protein	1631656 os12g0601000	1434	25	172	2.20508	12.1421	2.46111	Up	8.84e-22	1.03e-20
AK361678	Hordeum vulgare subsp. vulgare mRNA for predicted protein, complete cds, clone: NIASHv1146F17	2618690 protein	2382	8	55	0.424798	2.3374	2.46006	Up	8.16e-08	4e-07
AK367336	Hordeum vulgare subsp. vulgare mRNA for predicted protein, complete cds, clone: NIASHv2055E12	yggt family protein	693	7	48	1.27761	7.01166	2.45631	Up	5.89e-07	2.63e-06
AK373457	Hordeum vulgare subsp. vulgare mRNA for predicted protein, partial cds, clone: NIASHv3031G17	protein ein4-like	2193	13	89	0.749788	4.10832	2.45399	Up	7.16e-12	4.97e-11
MLOC_45783.1	Predicted protein (Uncharacterized protein)	2253809 pollen-specific protein like	321	25	171	9.85074	53.9267	2.4527	Up	1.39e-21	1.6e-20
MLOC_15452.1	Uncharacterized protein	rhamnogalacturonate lyase-like	1995	62	422	3.93081	21.4132	2.4456	Up	6.19e-51	1.51e-49
AK359064	Hordeum vulgare subsp. vulgare mRNA for predicted protein, complete cds, clone: NIASHv1088J16	2607414 protein	1248	36	244	3.64856	19.7919	2.43951	Up	5.2e-30	8.03e-29
AK365180	Hordeum vulgare subsp. vulgare mRNA for predicted protein, partial cds, clone: NIASHv2031L10	2881413 transducin-like	1947	8	54	0.519706	2.80764	2.43359	Up	1.29e-07	6.19e-07
MLOC_9291.1	Uncharacterized protein	serine threonine protein kinase atm	1824	4	27	0.277376	1.49848	2.43359	Up	0.000237776	0.000749758
MLOC_69091.1	Uncharacterized protein	763751 shock protein src2	1221	4	27	0.41436	2.23852	2.43359	Up	0.000237776	0.00074965
AK373742	Hordeum vulgare subsp. vulgare mRNA for predicted protein, complete cds, clone: NIASHv3042J14	852947 fusion protein of histone 2a and enhanced yellow fluorescence protein	441	139	937	39.8667	215.087	2.43166	Up	2.38e-110	1.2e-108
AK251773.1	-	probable leucine-rich repeat receptor-like serine threonine-protein kinase at3g14840-like	3045	19	128	0.789224	4.25535	2.43077	Up	2.41e-16	2.21e-15
AK248367.1	-	histone h2a	498	342	2301	86.8621	467.735	2.42889	Up	5.87e-268	6.37e-266
MLOC_66827.1	Uncharacterized protein	long chain acyl- synthetase 2-like	1986	51	341	3.24806	17.3815	2.4199	Up	5.65e-41	1.15e-39
MLOC_53923.1	Uncharacterized protein	cytokinin oxidase dehydrogenase	1776	30	200	2.13654	11.3999	2.41567	Up	1.35e-24	1.76e-23
MLOC_10177.1	Uncharacterized protein	fimbriata-like protein	888	13	86	1.85167	9.80389	2.40453	Up	2.8e-11	1.85e-10
MLOC_10003.2	Uncharacterized protein	1029275 lag1 and cln8 lipid-sensing domain containing protein	789	5	33	0.801543	4.23399	2.40117	Up	5.01e-05	0.000175757
MLOC_68151.2	Uncharacterized protein	b3 domain-containing protein os03g0619600-like	1806	5	33	0.350176	1.84973	2.40117	Up	5.01e-05	0.000175786
MLOC_8015.1	Uncharacterized protein	422975 os10g0446100	834	13	85	1.97156	10.3173	2.38765	Up	4.39e-11	2.86e-10
AK370836	Hordeum vulgare subsp. vulgare mRNA for predicted protein, complete cds, clone: NIASHv2117P18	50s ribosomal protein l9	591	74	482	15.8372	82.5605	2.38214	Up	2.95e-56	8.01e-55
AK362746	Hordeum vulgare subsp. vulgare mRNA for predicted protein, partial cds, clone: NIASHv2009N08	leucyl-trna cytoplasmic-like	3114	8	52	0.324941	1.69043	2.37914	Up	3.2e-07	1.47e-06
MLOC_54234.1	Uncharacterized protein	disease resistance rpp13-like protein 3-like	3435	6	39	0.220932	1.14935	2.37914	Up	1.07e-05	4.11e-05
MLOC_40499.1	Uncharacterized protein	cell division protein aaa atpase family	1770	216	1403	15.4353	80.2412	2.37811	Up	3.61e-160	2.55e-158
MLOC_53554.2	Uncharacterized protein	1390847 os01g0753800	636	19	123	3.77859	19.5777	2.37329	Up	2.29e-15	1.98e-14
MLOC_51583.2	3-ketoacyl-CoA synthase (EC 2.3.1.-)	3-ketoacyl- synthase 6-like	1503	47	301	3.95524	20.2731	2.35773	Up	2.63e-35	4.61e-34
MLOC_32822.1	Uncharacterized protein	avenin-like a precursor	378	138	881	46.1765	235.938	2.35317	Up	5.15e-100	2.37e-98
MLOC_62746.1	Uncharacterized protein	lichenase-2 precursor	1191	318	2029	33.7714	172.458	2.35237	Up	7.12e-228	6.73e-226
AK358760	Hordeum vulgare subsp. vulgare mRNA for predicted protein, complete cds, clone: NIASHv1082K22	2890420 cyclin-like	645	11	70	2.15708	10.9863	2.34855	Up	3.42e-09	1.91e-08
AK250623.1	-	defensin precursor	180	9	57	6.32417	32.0564	2.34167	Up	1.1e-07	5.32e-07
AK375707	Hordeum vulgare subsp. vulgare mRNA for predicted protein, complete cds, clone: NIASHv3101N21	gdsl esterase lipase at1g28600-like	1182	197	1238	21.0806	106.027	2.33044	Up	3.05e-138	1.87e-136
MLOC_57678.1	Uncharacterized protein	alpha-l-fucosidase 2 precursor	1134	194	1214	21.6383	108.372	2.32434	Up	3.52e-135	2.1e-133
MLOC_6058.2	Uncharacterized protein	dna replication complex gins protein psf1-like	918	9	56	1.24003	6.1753	2.31613	Up	1.72e-07	8.15e-07
MLOC_55354.1	Predicted protein (Uncharacterized protein)	1666109 os03g0253600	984	5	31	0.642701	3.18918	2.31097	Up	0.000124478	0.000408554
MLOC_35010.1	Uncharacterized protein	receptor-like protein kinase feronia-like	1503	22	136	1.85139	9.15994	2.30673	Up	2.43e-16	2.22e-15
MLOC_9538.1	DNA-directed RNA polymerase (EC 2.7.7.6)	rna polymerase beta subunit	258	6	37	2.94148	14.5176	2.30319	Up	2.64e-05	9.65e-05
MLOC_69770.2	Uncharacterized protein	2902728 protein	1551	6	37	0.489298	2.41492	2.30319	Up	2.64e-05	9.65e-05
AK370222	Hordeum vulgare subsp. vulgare mRNA for predicted protein, complete cds, clone: NIASHv2107C18	1847987 os02g0132200	1686	19	117	1.42538	7.02492	2.30114	Up	3.3e-14	2.66e-13
AK370563	Hordeum vulgare subsp. vulgare mRNA for predicted protein, complete cds, clone: NIASHv2112H24	78060 tpa: alpha-l-arabinofuranosidase family protein	2007	7	43	0.441148	2.16887	2.29761	Up	5.68e-06	2.26e-05
MLOC_13091.1	Uncharacterized protein	cobra-like protein 1-like	1566	32	196	2.58459	12.67	2.29341	Up	8.59e-23	1.04e-21
AK356354	Hordeum vulgare subsp. vulgare mRNA for predicted protein, complete cds, clone: NIASHv1033J02	aluminum-activated malate transporter 9-like	1746	18	110	1.30395	6.37766	2.29014	Up	2.29e-13	1.75e-12
AK356722	Hordeum vulgare subsp. vulgare mRNA for predicted protein, complete cds, clone: NIASHv1038P12	alpha-l-fucosidase 1-like	1446	48	293	4.19862	20.5122	2.28849	Up	2.88e-33	4.85e-32
MLOC_12047.1	Predicted protein (Uncharacterized protein)	predicted protein	783	20	122	3.23074	15.7729	2.28751	Up	1.15e-14	9.58e-14
AK376177	Hordeum vulgare subsp. vulgare mRNA for predicted protein, complete cds, clone: NIASHv3117D16	1633504 os03g0607600	1119	20	122	2.26065	11.0368	2.28751	Up	1.15e-14	9.58e-14
AK373344	Hordeum vulgare subsp. vulgare mRNA for predicted protein, complete cds, clone: NIASHv3027J18	1909347 cs 5	1155	31	189	3.39479	16.565	2.28675	Up	5.87e-22	6.88e-21
AK374191	Hordeum vulgare subsp. vulgare mRNA for predicted protein, complete cds, clone: NIASHv3057F05	852947 fusion protein of histone 2a and enhanced yellow fluorescence protein	438	30	182	8.66325	42.064	2.2796	Up	4.01e-21	4.54e-20
AK374122	Hordeum vulgare subsp. vulgare mRNA for predicted protein, complete cds, clone: NIASHv3055B21	vacuolar invertase	1827	17	103	1.17691	5.70705	2.27774	Up	1.58e-12	1.15e-11
MLOC_45540.1	Uncharacterized protein	2562703 os06g0114333	1092	82	496	9.49784	45.9803	2.27534	Up	7.31e-55	1.92e-53
MLOC_52635.1	Uncharacterized protein	753636 os10g0559800	1917	42	254	2.77116	13.413	2.27507	Up	7.63e-29	1.13e-27
MLOC_22907.1	Predicted protein (Uncharacterized protein)	basic blue protein	366	92	555	31.7937	153.506	2.27148	Up	4.51e-61	1.31e-59
AK368106	Hordeum vulgare subsp. vulgare mRNA for predicted protein, complete cds, clone: NIASHv2068E18	1151018 guanine nucleotide-binding protein	1293	85	511	8.31484	40.0069	2.26649	Up	3.24e-56	8.78e-55
MLOC_72559.1	Uncharacterized protein	fructan exohydrolase	1554	118	709	9.60428	46.1858	2.2657	Up	2.54e-77	9.26e-76
MLOC_59733.1	Uncharacterized protein	1023481 os03g0594700	1716	13	78	0.958208	4.6014	2.26366	Up	9.91e-10	5.79e-09
MLOC_18166.1	CASP-like protein	casp-like protein gsvivt00013502001-like	573	5	30	1.1037	5.30004	2.26366	Up	0.000195085	0.000623517
MLOC_52363.1	Uncharacterized protein	dna polymerase epsilon subunit 2-like	540	5	30	1.17114	5.62394	2.26366	Up	0.000195085	0.000623608
AK374797	Hordeum vulgare subsp. vulgare mRNA for predicted protein, complete cds, clone: NIASHv3076K17	histone h2a	468	210	1258	56.7554	272.112	2.26137	Up	1.59e-135	9.55e-134
MLOC_76160.3	Xyloglucan endotransglucosylase/hydrolase (EC 2.4.1.207)	xyloglucan endotransglycosylase hydrolase partial	969	81	483	10.5729	50.4587	2.25473	Up	6.7e-53	1.7e-51
MLOC_36925.1	Uncharacterized protein	1631647 os12g0594200	4071	12	71	0.372833	1.76551	2.24348	Up	6.93e-09	3.78e-08
MLOC_75211.1	Uncharacterized protein (Fragment)	hypothetical protein SORBIDRAFT_01g025860	684	52	307	9.6157	45.4355	2.24036	Up	6.08e-34	1.05e-32
MLOC_36905.1	Uncharacterized protein	1848859 partial	1575	6	35	0.481842	2.24957	2.22302	Up	6.44e-05	0.000221499
MLOC_4526.1	Uncharacterized protein	upf0326 protein at4g17486-like	576	6	35	1.31754	6.15118	2.22302	Up	6.44e-05	0.000221464
MLOC_61976.1	Uncharacterized protein	2881338 phloem-specific lectin-like	945	5	29	0.669225	3.10656	2.21475	Up	0.000304546	0.000937553
MLOC_34767.1	Predicted protein (Uncharacterized protein)	2609766 protein	591	24	139	5.13638	23.8089	2.21268	Up	6.29e-16	5.62e-15
MLOC_51101.1	Uncharacterized protein	probable peptide transporter at1g52190-like	1881	14	81	0.941397	4.35922	2.2112	Up	8.17e-10	4.81e-09
MLOC_67513.6	-	dead-box atp-dependent rna helicase chloroplastic-like	1344	50	289	4.70549	21.7676	2.20977	Up	1.56e-31	2.49e-30
MLOC_16734.1	Uncharacterized protein	2604944 protein	1299	126	728	12.2686	56.7329	2.20922	Up	5.38e-77	1.95e-75
MLOC_1081.1	Uncharacterized protein	aaa-type atpase	1518	48	277	3.99948	18.4723	2.20748	Up	2.99e-30	4.64e-29
AK371168	Hordeum vulgare subsp. vulgare mRNA for predicted protein, complete cds, clone: NIASHv2127C03	ubiquitin carboxyl-terminal hydrolase 12-like	2370	7	40	0.37358	1.70854	2.19327	Up	2.14e-05	7.91e-05
MLOC_69288.1	Uncharacterized protein	blue copper	483	7	40	1.83309	8.38351	2.19327	Up	2.14e-05	7.92e-05
MLOC_50835.2	Predicted protein (Uncharacterized protein)	hydroquinone glucosyltransferase-like	1446	62	354	5.42322	24.7827	2.19211	Up	6.35e-38	1.2e-36
MLOC_61195.1	Uncharacterized protein	protein accumulation and replication of chloroplasts 3-like	1740	10	57	0.726916	3.31618	2.18966	Up	3.41e-07	1.56e-06
MLOC_64016.1	Uncharacterized protein	2603651 lipase-like protein	1140	25	142	2.77376	12.6095	2.18459	Up	5.17e-16	4.64e-15
AK375777	Hordeum vulgare subsp. vulgare mRNA for predicted protein, complete cds, clone: NIASHv3104B05	599177 os11g0448700	312	6	34	2.43237	11.0316	2.1812	Up	0.000100078	0.000334245
MLOC_37037.1	Uncharacterized protein	transposon mutator sub-class	1707	163	920	12.0778	54.5591	2.17546	Up	4.67e-95	2.03e-93
AK373523	Hordeum vulgare subsp. vulgare mRNA for predicted protein, complete cds, clone: NIASHv3033M24	histone h2a	468	70	395	18.9185	85.4406	2.17513	Up	9.52e-42	1.97e-40
AK360343	Hordeum vulgare subsp. vulgare mRNA for predicted protein, complete cds, clone: NIASHv1116C03	phospholipase c	1767	22	124	1.57478	7.10392	2.17347	Up	4.49e-14	3.6e-13
MLOC_61123.3	Uncharacterized protein	1634794 os06g0129800	672	117	657	22.0217	98.9712	2.16809	Up	4.29e-68	1.38e-66
AK248612.1	-	61442 os06g0134300	744	12	67	2.04006	9.11622	2.15983	Up	3.94e-08	1.99e-07
AK370604	Hordeum vulgare subsp. vulgare mRNA for predicted protein, complete cds, clone: NIASHv2113B17	2597604 histone h4	309	38	212	15.5546	69.4529	2.15869	Up	6.7e-23	8.18e-22
AK252922.1	-	histone -like isoform 1	459	83	463	22.8717	102.113	2.15853	Up	3.24e-48	7.58e-47
AK251131.1	-	polyphosphoinositide binding protein ssh2p	741	7	39	1.19485	5.32794	2.15675	Up	3.31e-05	0.000118984
MLOC_25280.1	Uncharacterized protein	nadh dehydrogenase subunit partial	399	43	239	13.631	60.637	2.1533	Up	1.48e-25	1.98e-24
MLOC_6294.1	Predicted protein (Uncharacterized protein)	gdsl esterase lipase at5g33370-like	1125	44	244	4.94691	21.9558	2.15001	Up	5.16e-26	6.98e-25
MLOC_72890.1	Predicted protein (Uncharacterized protein)	1126607 arm repeat-containing protein	1929	13	72	0.852403	3.77845	2.14819	Up	1.34e-08	7.11e-08
AK249953.1	-	2597604 histone h4	309	40	221	16.3733	72.4014	2.14467	Up	1.24e-23	1.56e-22
AK375357	Hordeum vulgare subsp. vulgare mRNA for predicted protein, complete cds, clone: NIASHv3092A12	2253883 ubiquilin-1	1599	32	176	2.53125	11.1424	2.13813	Up	4.82e-19	5.01e-18
MLOC_12979.3	Uncharacterized protein	abnormal spindle-like microcephaly-associated protein homolog	2499	18	99	0.911045	4.01035	2.13813	Up	2.69e-11	1.78e-10
MLOC_78783.3	Uncharacterized protein	disease resistance protein rga4-like	3132	35	192	1.41345	6.20572	2.13438	Up	1.33e-20	1.46e-19
AK373703	Hordeum vulgare subsp. vulgare mRNA for predicted protein, partial cds, clone: NIASHv3041A12	btb poz domain-containing protein at1g30440-like	1791	25	137	1.76554	7.74351	2.13288	Up	4.37e-15	3.7e-14
AK370086	Hordeum vulgare subsp. vulgare mRNA for predicted protein, complete cds, clone: NIASHv2104L10	1324702 cell wall protein	4257	81	442	2.40666	10.5107	2.12675	Up	2.75e-45	6.14e-44
MLOC_13612.1	Sugar transporter SWEET	1901783 mtn3-like protein	882	33	180	4.73237	20.6594	2.12616	Up	2.56e-19	2.68e-18
AK249735.1	-	dna primase small subunit-like	1353	64	349	5.98296	26.112	2.12578	Up	4.54e-36	8.15e-35
MLOC_70988.1	Uncharacterized protein	esterase lipase thioesterase family protein	1002	84	458	10.6034	46.2712	2.12559	Up	7.75e-47	1.78e-45
MLOC_71314.1	Uncharacterized protein	f-box protein	267	9	49	4.26349	18.5779	2.12349	Up	3.7e-06	1.51e-05
MLOC_67256.3	Predicted protein (Uncharacterized protein)	dna replication licensing factor mcm4	2538	183	991	9.11997	39.5271	2.11574	Up	8e-99	3.65e-97
MLOC_64088.1	Predicted protein (Uncharacterized protein)	2605727 protein	486	97	525	25.2446	109.354	2.11496	Up	3.98e-53	1.01e-51
AK356076	Hordeum vulgare subsp. vulgare mRNA for predicted protein, partial cds, clone: NIASHv1029K23	probable exocyst complex component 6-like	1809	10	54	0.69919	3.02182	2.11166	Up	1.24e-06	5.36e-06
AK375070	Hordeum vulgare subsp. vulgare mRNA for predicted protein, complete cds, clone: NIASHv3084O03	2597604 histone h4	309	333	1795	136.307	588.056	2.10909	Up	8.08e-177	6.13e-175
AK371513	Hordeum vulgare subsp. vulgare mRNA for predicted protein, complete cds, clone: NIASHv2136C02	lycopene epsilon cyclase	1608	29	156	2.28111	9.8209	2.10612	Up	9.56e-17	8.93e-16
AK374783	Hordeum vulgare subsp. vulgare mRNA for predicted protein, partial cds, clone: NIASHv3076E19	1739145 os10g0324600	600	24	129	5.05934	21.7646	2.10497	Up	4.49e-14	3.59e-13
AK364444	Hordeum vulgare subsp. vulgare mRNA for predicted protein, complete cds, clone: NIASHv2025D21	nucleobase-ascorbate transporter 2-like	1575	105	564	8.43223	36.2503	2.10401	Up	1.37e-56	3.75e-55
AK377028	Hordeum vulgare subsp. vulgare mRNA for predicted protein, complete cds, clone: NIASHv3145O19	low quality protein: tyrosine n-monooxygenase-like	1653	11	59	0.841693	3.6132	2.10191	Up	4.19e-07	1.9e-06
MLOC_16579.1	Uncharacterized protein (Fragment)	58363 os06g0341600	2505	57	305	2.87807	12.3255	2.09848	Up	3.14e-31	4.99e-30
AK375527	Hordeum vulgare subsp. vulgare mRNA for predicted protein, complete cds, clone: NIASHv3096P22	dna cytosine methyltransferase expressed	1737	59	315	4.29621	18.3579	2.09527	Up	3.82e-32	6.22e-31
MLOC_70353.1	Uncharacterized protein	1635778 partial	549	6	32	1.38233	5.90052	2.09374	Up	0.000238652	0.000752303
MLOC_28326.1	Uncharacterized protein (Fragment)	f-box lrr-repeat protein at5g02700-like	225	9	48	5.05934	21.5959	2.09374	Up	5.67e-06	2.26e-05
MLOC_47532.2	Uncharacterized protein	probable aspartic protease at2g35615-like	1413	15	80	1.34271	5.7314	2.09374	Up	3.65e-09	2.04e-08
MLOC_65225.2	Peroxidase (EC 1.11.1.7)	root peroxidase	957	6	32	0.793	3.38494	2.09374	Up	0.000238652	0.000752195
MLOC_58422.2	Uncharacterized protein	fructan:fructan 1-fructosyltransferase	1929	74	394	4.85214	20.6765	2.0913	Up	1e-39	1.98e-38
AK367725	Hordeum vulgare subsp. vulgare mRNA for predicted protein, complete cds, clone: NIASHv2061E04	bifunctional dihydroflavonol 4-reductase flavanone 4-reductase-like	975	22	117	2.85399	12.1477	2.08963	Up	8.77e-13	6.47e-12
MLOC_71337.1	Uncharacterized protein (Fragment)	1634204 os04g0599650	1545	19	101	1.55546	6.61768	2.08898	Up	3.29e-11	2.17e-10
MLOC_71784.1	Uncharacterized protein	12-oxophytodienoate reductase 5-like	1086	16	85	1.86348	7.92323	2.08809	Up	1.25e-09	7.24e-09
AK365072	Hordeum vulgare subsp. vulgare mRNA for predicted protein, complete cds, clone: NIASHv2030L04	1850950 os09g0487500	357	55	292	19.4862	82.7995	2.08717	Up	9.05e-30	1.38e-28
MLOC_54510.1	Uncharacterized protein	1360712 calcium-dependent protein kinase	1563	86	456	6.95942	29.5338	2.08533	Up	1.44e-45	3.24e-44
MLOC_57325.2	Kinesin-like protein	atp binding	6072	14	74	0.291629	1.23371	2.0808	Up	1.63e-08	8.6e-08
MLOC_71060.5	Uncharacterized protein	dna repair protein rad51 homolog 4-like	813	7	37	1.08903	4.60706	2.0808	Up	7.85e-05	0.000266047
AK375768	Hordeum vulgare subsp. vulgare mRNA for predicted protein, complete cds, clone: NIASHv3103L21	folic acid binding transferase	927	7	37	0.955107	4.0405	2.0808	Up	7.85e-05	0.000266089
MLOC_65166.2	Uncharacterized protein (Universal stress protein)	universal stress protein	519	14	74	3.41189	14.4337	2.0808	Up	1.63e-08	8.6e-08
MLOC_58350.1	Uncharacterized protein	2708893 2 protease	1812	45	237	3.14115	13.2405	2.07559	Up	2.79e-24	3.59e-23
MLOC_71244.3	Predicted protein (Uncharacterized protein)	carboxyl-terminal proteinase	1269	39	205	3.8872	16.3533	2.07278	Up	3.64e-21	4.14e-20
AK357284	Hordeum vulgare subsp. vulgare mRNA for predicted protein, complete cds, clone: NIASHv1049N05	cytokinin-o-glucosyltransferase 2	1455	8	42	0.695442	2.92213	2.07102	Up	2.6e-05	9.51e-05
AK369735	Hordeum vulgare subsp. vulgare mRNA for predicted protein, partial cds, clone: NIASHv2097A05	1-aminocyclopropane-1-carboxylate oxidase homolog 1-like	588	20	105	4.30216	18.0769	2.07102	Up	1.72e-11	1.16e-10
MLOC_10556.1	Uncharacterized protein	myb-related protein 3r-1-like	2943	12	63	0.515733	2.16702	2.07102	Up	2.16e-07	1.01e-06
MLOC_70609.1	Predicted protein (Uncharacterized protein)	287292 at3g19990	1356	142	744	13.2453	55.5426	2.06811	Up	1.49e-72	5.05e-71
AK373956	Hordeum vulgare subsp. vulgare mRNA for predicted protein, partial cds, clone: NIASHv3049C18	1389944 os01g0931200	684	26	136	4.80785	20.1278	2.06572	Up	1.88e-14	1.54e-13
MLOC_55969.2	Predicted protein (Uncharacterized protein)	deoxycytidylate deaminase	699	9	47	1.62854	6.80665	2.06336	Up	8.67e-06	3.38e-05
MLOC_61201.1	Uncharacterized protein	histone chaperone asf1b	618	55	287	11.2566	47.0117	2.06225	Up	7.24e-29	1.07e-27
MLOC_64422.1	Uncharacterized protein	59241 ribosomal	660	16	83	3.06627	12.7305	2.05374	Up	2.89e-09	1.63e-08
MLOC_13794.2	Uncharacterized protein	abc transporter a family member 7-like	1344	11	57	1.03521	4.29327	2.05216	Up	9.77e-07	4.26e-06
AK374269	Hordeum vulgare subsp. vulgare mRNA for predicted protein, complete cds, clone: NIASHv3059A18	dna polymerase alpha subunit b-like	1875	29	150	1.95628	8.09847	2.04954	Up	1.17e-15	1.03e-14
MLOC_55078.2	Predicted protein (Uncharacterized protein)	ribonuclease h2 subunit b	843	12	62	1.80048	7.44521	2.04793	Up	3.3e-07	1.51e-06
MLOC_56311.1	Uncharacterized protein	l-ascorbate oxidase homolog	1674	18	93	1.36004	5.62394	2.04793	Up	3.37e-10	2.05e-09
MLOC_53684.2	Uncharacterized protein	gh3 family protein	1743	389	2009	28.2284	116.68	2.04734	Up	2.08e-190	1.7e-188
AK369873	Hordeum vulgare subsp. vulgare mRNA for predicted protein, complete cds, clone: NIASHv2100E02	2558903 histone h3	408	155	800	48.0513	198.492	2.04643	Up	7.22e-77	2.62e-75
MLOC_58270.2	Uncharacterized protein	fructan:fructan 1-fructosyltransferase	2172	76	391	4.42576	18.2234	2.0418	Up	2.67e-38	5.09e-37
MLOC_79078.1	Uncharacterized protein	820121 os04g0494600	1134	7	36	0.780762	3.21368	2.04127	Up	0.000120142	0.000395271
MLOC_78716.2	Uncharacterized protein	1329077 cytochrome	1524	8	41	0.663955	2.7234	2.03625	Up	3.97e-05	0.000141162
AK358265	Hordeum vulgare subsp. vulgare mRNA for predicted protein, complete cds, clone: NIASHv1072F03	gast1 protein precursor	303	25	128	10.4359	42.7642	2.03484	Up	1.9e-13	1.46e-12
MLOC_39004.1	Uncharacterized protein	1024402 os03g0180100	387	9	46	2.94148	12.0326	2.03234	Up	1.32e-05	5.02e-05
MLOC_63125.1	Uncharacterized protein	pathogenisis-related protein	516	9	46	2.20611	9.02446	2.03234	Up	1.32e-05	5.02e-05
MLOC_43354.2	Uncharacterized protein	transposon mutator sub-class	900	55	281	7.72954	31.6065	2.03177	Up	8.63e-28	1.24e-26
MLOC_81154.10	Uncharacterized protein	2707898 pseudo-response receiver	1380	28	143	2.56633	10.4899	2.03122	Up	7.77e-15	6.51e-14
MLOC_59908.1	Uncharacterized protein	2690168 rna polymerase alpha subunit	699	324	1648	58.6275	238.667	2.02535	Up	2.11e-154	1.43e-152
MLOC_38366.1	Predicted protein (Uncharacterized protein)	peptide transporter ptr3-a-like	1779	47	239	3.34161	13.5999	2.02498	Up	9.2e-24	1.16e-22
MLOC_60208.1	Uncharacterized protein	amino acid selective channel protein	432	88	447	25.7651	104.746	2.0234	Up	4.49e-43	9.58e-42
MLOC_68895.2	Predicted protein (Uncharacterized protein)	adipor-like receptor cg5315-like	1107	89	452	10.169	41.3336	2.02315	Up	1.57e-43	3.37e-42
AK252598.1	-	histone -like isoform 1	411	17	86	5.23168	21.1821	2.0175	Up	2.26e-09	1.28e-08
AK358031	Hordeum vulgare subsp. vulgare mRNA for predicted protein, complete cds, clone: NIASHv1067F07	heparanase-like protein 3-like	1647	18	91	1.38233	5.5932	2.01657	Up	7.73e-10	4.56e-09
MLOC_9883.3	Uncharacterized protein	duf246 domain-containing protein at1g04910-like	1470	28	141	2.40921	9.7099	2.0109	Up	1.77e-14	1.45e-13
MLOC_5511.1	Uncharacterized protein	2790782 potyviral helper component protease-interacting protein 1	1746	14	70	1.01419	4.05851	2.00063	Up	8.68e-08	4.24e-07
MLOC_34517.7	Uncharacterized protein	dna (cytosine-5)-methyltransferase drm1-like	1776	22	110	1.5668	6.26993	2.00063	Up	1.61e-11	1.09e-10
MLOC_60015.5	Uncharacterized protein	transducin family protein	2898	19	95	0.829257	3.31847	2.00063	Up	3.99e-10	2.41e-09
MLOC_67316.1	Uncharacterized protein	1848777 partial	1086	13	65	1.51407	6.05894	2.00063	Up	2.56e-07	1.19e-06
AK360527	Hordeum vulgare subsp. vulgare mRNA for predicted protein, complete cds, clone: NIASHv1119N24	l-gulonolactone oxidase-like	1746	15	75	1.08663	4.3484	2.00063	Up	2.95e-08	1.51e-07
AK375606	Hordeum vulgare subsp. vulgare mRNA for predicted protein, complete cds, clone: NIASHv3099F24	hexose transporter	1737	8	40	0.582538	2.33117	2.00063	Up	6.05e-05	0.000208657
AK375010	Hordeum vulgare subsp. vulgare mRNA for predicted protein, complete cds, clone: NIASHv3083E23	14726 os02g0667600	1008	30	150	3.76439	15.0641	2.00063	Up	3.18e-15	2.72e-14
AK249360.1	-	purple acid phosphatase 22-like	1263	8	40	0.801162	3.20604	2.00063	Up	6.05e-05	0.00020869
MLOC_20462.1	Uncharacterized protein	histone-lysine n-methyltransferase atxr6-like	789	10	50	1.60309	6.41514	2.00063	Up	6.71e-06	2.65e-05
MLOC_1588.1	Uncharacterized protein	protein far1-related sequence 5-like	444	9	45	2.56385	10.2599	2.00063	Up	2.01e-05	7.45e-05
AK357120	Hordeum vulgare subsp. vulgare mRNA for predicted protein, complete cds, clone: NIASHv1046H22	dihydrofolate reductase-like	741	25	125	4.26732	17.0767	2.00063	Up	6.53e-13	4.86e-12
MLOC_75827.1	Predicted protein (Uncharacterized protein)	probable protein phosphatase 2c 73-like	1278	36	180	3.56291	14.2579	2.00063	Up	5.43e-18	5.41e-17
AK355026	Hordeum vulgare subsp. vulgare mRNA for predicted protein, complete cds, clone: NIASHv1014O02	1901287 chl-cpn10	411	51	253	15.695	62.3149	1.98927	Up	1.56e-24	2.02e-23
AK250321.1	-	gdsl esterase lipase at5g62930-like	807	18	89	2.82119	11.1642	1.98451	Up	1.76e-09	1.01e-08
AK250965.1	-	2597604 histone h4	309	68	336	27.8345	110.076	1.98355	Up	5.64e-32	9.12e-31
AK354837	Hordeum vulgare subsp. vulgare mRNA for predicted protein, complete cds, clone: NIASHv1011N23	probable inactive purple acid phosphatase 1-like	1893	90	444	6.01348	23.7435	1.98126	Up	1.09e-41	2.24e-40
AK368339	Hordeum vulgare subsp. vulgare mRNA for predicted protein, complete cds, clone: NIASHv2072F02	proliferating cell nuclear antigen	789	232	1143	37.1916	146.65	1.97933	Up	1.52e-104	7.36e-103
AK368250	Hordeum vulgare subsp. vulgare mRNA for predicted protein, complete cds, clone: NIASHv2070N21	sulfotransferase 17-like	993	12	59	1.5285	6.01472	1.97638	Up	1.15e-06	4.96e-06
AK249511.1	-	2597604 histone h4	537	12	59	2.82645	11.1222	1.97638	Up	1.15e-06	4.96e-06
MLOC_7405.1	Uncharacterized protein	chaperone protein dnaj 6-like	843	147	722	22.0558	86.7007	1.97488	Up	1.72e-66	5.42e-65
MLOC_5912.1	Uncharacterized protein	fasciclin-like arabinogalactan protein 1-like	456	20	98	5.54752	21.7558	1.97148	Up	3.1e-10	1.89e-09
MLOC_6533.1	Uncharacterized protein	centromere specific histone h3 variant	501	9	44	2.27216	8.89053	1.96821	Up	3.04e-05	0.000109734
MLOC_17526.1	DNA-directed RNA polymerase (EC 2.7.7.6)	dna-directed rna polymerase ii subunit rpb1-like	2580	25	122	1.22561	4.78689	1.96558	Up	2.22e-12	1.6e-11
AK354832	Hordeum vulgare subsp. vulgare mRNA for predicted protein, complete cds, clone: NIASHv1011M23	serine carboxypeptidase 2-like	1428	1016	4958	89.991	351.472	1.96556	Up	0	0
AK369388	Hordeum vulgare subsp. vulgare mRNA for predicted protein, partial cds, clone: NIASHv2090E23	leucine rich repeat family protein	963	8	39	1.05075	4.09969	1.9641	Up	9.17e-05	0.00030806
AK375042	Hordeum vulgare subsp. vulgare mRNA for predicted protein, complete cds, clone: NIASHv3084B19	vacuolar h+-translocating inorganic pyrophosphatase	2289	3152	15358	174.17	679.206	1.96335	Up	0	0
MLOC_10316.1	Uncharacterized protein	f-box fbd lrr-repeat protein	738	45	219	7.71241	30.0401	1.96163	Up	4.49e-21	5.07e-20
MLOC_64708.1	Uncharacterized protein	nbs-lrr type protein	3837	20	97	0.659283	2.55913	1.95669	Up	4.66e-10	2.8e-09
MLOC_11136.1	Uncharacterized protein	long chain acyl- synthetase chloroplastic-like	2091	73	354	4.41573	17.1381	1.95648	Up	4.89e-33	8.14e-32
MLOC_65700.1	3-ketoacyl-CoA synthase (EC 2.3.1.-)	512499 fiddlehead	1704	655	3175	48.6189	188.62	1.95589	Up	1.26e-282	1.47e-280
AK252102.1	-	2597604 histone h4	309	29	140	11.8706	45.8651	1.95	Up	7.04e-14	5.56e-13
AK371287	Hordeum vulgare subsp. vulgare mRNA for predicted protein, partial cds, clone: NIASHv2129M10	uncharacterized membrane protein stkorf319-like	1134	17	82	1.89614	7.32004	1.94879	Up	1.17e-08	6.23e-08
MLOC_71644.1	Uncharacterized protein	2618625 protein	1014	87	419	10.8521	41.8301	1.94656	Up	1.44e-38	2.76e-37
MLOC_63339.1	Uncharacterized protein	dicer-like protein	3780	10	48	0.334612	1.28547	1.94173	Up	1.53e-05	5.77e-05
MLOC_68274.2	Uncharacterized protein	protein	1713	34	163	2.51047	9.63259	1.93997	Up	7.75e-16	6.86e-15
AK375674	Hordeum vulgare subsp. vulgare mRNA for predicted protein, complete cds, clone: NIASHv3100P10	1329507 os05g0551100	2835	19	91	0.847685	3.24939	1.93857	Up	2.04e-09	1.16e-08
AK355075	Hordeum vulgare subsp. vulgare mRNA for predicted protein, complete cds, clone: NIASHv1015I23	gamma-tocopherol methyltransferase	1107	146	699	16.6816	63.9208	1.93802	Up	6.75e-63	2.04e-61
AK372691	Hordeum vulgare subsp. vulgare mRNA for predicted protein, partial cds, clone: NIASHv3009I15	probable peptide nitrate transporter at1g22540-like	1548	9	43	0.735369	2.81197	1.93504	Up	4.6e-05	0.000162303
MLOC_60120.1	Uncharacterized protein	importin 9	1071	9	43	1.06289	4.06436	1.93504	Up	4.6e-05	0.000162277
MLOC_56115.1	Uncharacterized protein	glycerol-3-phosphate acyltransferase 6-like	1491	121	578	10.2646	39.2431	1.93476	Up	3.47e-52	8.71e-51
MLOC_16646.2	Peroxidase (EC 1.11.1.7)	peroxidase 3-like	1002	13	62	1.641	6.26379	1.93246	Up	8.78e-07	3.85e-06
AK252853.1	-	1908598 histone	414	321	1529	98.0705	373.87	1.93064	Up	8.17e-135	4.84e-133
AK365716	Hordeum vulgare subsp. vulgare mRNA for predicted protein, complete cds, clone: NIASHv2036M06	1068513 serine carboxypeptidase	1365	312	1486	28.9105	110.204	1.93052	Up	4.6e-131	2.66e-129
MLOC_57228.2	Predicted protein (Uncharacterized protein)	1145619 os01g0260800	282	21	100	9.41898	35.8975	1.93024	Up	3.59e-10	2.17e-09
AK360878	Hordeum vulgare subsp. vulgare mRNA for predicted protein, complete cds, clone: NIASHv1127F22	protein	1032	25	119	3.06404	11.6729	1.92966	Up	7.47e-12	5.17e-11
MLOC_62754.1	Endoglucanase (EC 3.2.1.4)	endo-beta- -glucanase	1866	53	252	3.59251	13.671	1.92806	Up	1.58e-23	1.98e-22
MLOC_78870.1	Uncharacterized protein	rr1 - corn type-a response regulator	663	8	38	1.5262	5.80207	1.92663	Up	0.000138595	0.000453049
AK250581.1	-	histone h2a	462	384	1824	105.129	399.665	1.92663	Up	5.01e-160	3.53e-158
AK376393	Hordeum vulgare subsp. vulgare mRNA for predicted protein, complete cds, clone: NIASHv3122J04	uncharacterized wd repeat-containing	1335	32	152	3.03181	11.5259	1.92663	Up	9.69e-15	8.08e-14
AK369403	Hordeum vulgare subsp. vulgare mRNA for predicted protein, partial cds, clone: NIASHv2090I15	folylpolyglutamate mitochondrial-like	1125	47	222	5.2842	19.9762	1.91853	Up	8.97e-21	1e-19
MLOC_15998.1	Uncharacterized protein	structural maintenance of chromosomes protein 4-like	1503	36	170	3.02954	11.4499	1.91817	Up	3.09e-16	2.81e-15
MLOC_66496.1	Uncharacterized protein	1850160 os06g0165300	1299	32	151	3.11584	11.7674	1.91711	Up	1.45e-14	1.19e-13
AK251605.1	-	cadmium tolerant 1	165	14	66	10.7319	40.4923	1.91574	Up	4.46e-07	2.02e-06
MLOC_67192.1	Endoglucanase (EC 3.2.1.4)	333166 at1g70710 f5a18_11	1239	24	113	2.45004	9.23252	1.91392	Up	3.24e-11	2.14e-10
AK354249	Hordeum vulgare subsp. vulgare mRNA for predicted protein, complete cds, clone: NIASHv1006B03	probably inactive leucine-rich repeat receptor-like protein kinase at3g28040-like	3156	37	174	1.48285	5.58117	1.91219	Up	1.6e-16	1.47e-15
MLOC_53969.5	Serine/threonine-protein kinase (EC 2.7.11.1)	tpa: s-locus receptor-like protein kinase family protein	2439	20	94	1.03717	3.90148	1.91136	Up	1.56e-09	9.02e-09
MLOC_66828.2	Uncharacterized protein	glutamate receptor -like	1488	13	61	1.10503	4.14992	1.909	Up	1.32e-06	5.66e-06
MLOC_59481.1	-	2880100 40s ribosomal protein s30	186	238	1113	161.844	605.752	1.90412	Up	7.13e-97	3.17e-95
MLOC_67906.1	Uncharacterized protein	anthocyanin 5-aromatic acyltransferase-like	1431	36	168	3.18197	11.8845	1.90109	Up	6.86e-16	6.1e-15
AK357785	Hordeum vulgare subsp. vulgare mRNA for predicted protein, partial cds, clone: NIASHv1061M14	943562 protein	828	9	42	1.37482	5.1349	1.90109	Up	6.92e-05	0.000236889
MLOC_36919.1	Uncharacterized protein	4-hydroxyphenylacetaldehyde oxime monooxygenase-like	1236	21	98	2.14899	8.02639	1.90109	Up	8.01e-10	4.72e-09
MLOC_32569.1	Uncharacterized protein	ripening-related protein 6-like	510	154	718	38.193	142.517	1.89975	Up	6.35e-63	1.92e-61
MLOC_58456.1	Uncharacterized protein (Fragment)	2872129 os01g0800200	291	10566	49199	4592.52	17115	1.8979	Up	0	0
AK367273	Hordeum vulgare subsp. vulgare mRNA for predicted protein, complete cds, clone: NIASHv2053N14	aldehyde dehydrogenase family protein	2733	41	190	1.89748	7.03764	1.891	Up	1.13e-17	1.11e-16
AK374520	Hordeum vulgare subsp. vulgare mRNA for predicted protein, complete cds, clone: NIASHv3067M21	chromosome transmission fidelity protein 18 homolog	2817	32	148	1.4368	5.31848	1.88815	Up	4.77e-14	3.81e-13
MLOC_56820.1	Uncharacterized protein	1138909 at2g32980	792	64	296	10.2209	37.8338	1.88815	Up	1.14e-26	1.58e-25
MLOC_54963.1	Uncharacterized protein	abc transporter b family member 2-like	3999	205	948	6.4839	23.9977	1.88796	Up	7.34e-82	2.76e-80
MLOC_50162.7	Uncharacterized protein	sucrose synthase	2448	135	624	6.97519	25.8039	1.88729	Up	1.93e-54	5.04e-53
[truncated: 3,231 more rows]

## Sheet: Table S3
Table S3. Experimental validation using qRT-PCR and primer sequences for qRT-PCR expression analysis.
[truncated: 17 more rows]

[truncated: 2 more sheets: Table S4, Table S5]
